# Supplementary material for: Access to enantioenriched molecules with diverse fluorinated tetrasubstituted stereocenters using hydroxy as a kinetic resolution auxiliary group
Source: Royal Society of Chemistry journal article supplement (doi:10.1039/d1qo01493e), 2022-01-01
Supplement: d1qo01493e1.pdf [file d1qo01493e1.pdf]

# Access to Enantioenriched Molecules with Diverse Fluorinated Tetrasubstituted Stereocenters Using Hydroxy as Kinetic Resolution Auxiliary Group

Syeda Tazeen Zehra,<sup>a</sup> Shouang Lan,<sup>a</sup> Hao Zhang,<sup>a</sup> Jinggong Liu,<sup>\*b</sup> Shuang Yang,<sup>a</sup> and Xinqiang Fang<sup>\*a</sup>

<sup>a</sup>State Key Laboratory of Structural Chemistry, and Key Laboratory of Coal to Ethylene Glycol and Its Related Technology, Center for Excellence in Molecular Synthesis, Fujian Institute of Research on the Structure of Matter, University of Chinese Academy of Sciences, Fuzhou 350100, China.

<sup>b</sup>Orthopedics Department, Guangdong Provincial Hospital of Traditional Chinese Medicine, The Second Affiliated Hospital of Guangzhou University of Chinese Medicine, Guangzhou 510120, China.

\*xqfang@fjirsm.ac.cn

\*liujinggong001@163.com

## Table of Contents

|             |                                                                                                                                                                                                                                                                                                               |      |
|-------------|---------------------------------------------------------------------------------------------------------------------------------------------------------------------------------------------------------------------------------------------------------------------------------------------------------------|------|
| <b>I</b>    | General information                                                                                                                                                                                                                                                                                           | S1   |
| <b>II</b>   | X-ray crystallographic analysis                                                                                                                                                                                                                                                                               | S2   |
| <b>III</b>  | General procedures for the preparation of substrates<br>1. Typical procedure for the preparation of substrates <b>1a–1l</b> , and <b>1t</b><br>2. Typical procedure for the synthesis of substrates <b>1m–1r</b> , <b>1u</b> , and <b>1v</b><br>3. Typical procedure for the synthesis of substrate <b>1s</b> | S5   |
| <b>IV</b>   | Typical procedures for the kinetic resolution                                                                                                                                                                                                                                                                 | S7   |
| <b>V</b>    | Procedures for the derivatizations                                                                                                                                                                                                                                                                            | S7   |
| <b>VI</b>   | Characterizations of new compounds                                                                                                                                                                                                                                                                            | S10  |
| <b>VII</b>  | <sup>1</sup> H NMR, <sup>13</sup> C NMR, and <sup>19</sup> F NMR spectra of substrates and products                                                                                                                                                                                                           | S31  |
| <b>VIII</b> | HPLC spectra for <i>ee</i> determination                                                                                                                                                                                                                                                                      | S108 |

## I. General Information.

Commercially available materials were used as received, unless otherwise noted, all reactions and manipulations involving air- or moisture-sensitive compounds were performed using standard Schlenk technique. All solvents were purified and dried using standard procedures. Proton nuclear magnetic resonance (<sup>1</sup>H NMR) spectra were recorded on a Bruker AVANCE III HD400 (400 MHz) spectrometer. Chemical shifts were recorded in parts per million (ppm,  $\delta$ ) relative to tetramethylsilane ( $\delta = 0.00$  ppm) or chloroform ( $\delta = 7.26$  ppm). <sup>1</sup>H NMR splitting patterns are designated as singlet (s), doublet (d), triplet (t), quartet (q), dd (doublet of doublets);

m (multiplet), and etc. All first-order splitting patterns were assigned on the basis of the appearance of the multiplet. Splitting patterns that could not be easily interpreted are designated as multiplet (m) or broad (br). Carbon nuclear magnetic resonance ( $^{13}\text{C}$  NMR) spectra were recorded on a Bruker AVANCE III HD400 (400 MHz) (100 MHz) spectrometer. High resolution mass spectral analysis (HRMS) was performed on Thermo Fisher Scientific LTQ FT Ultra mass spectrometer. The determination of *e.e.* was performed via chiral HPLC analysis using Shimadzu LC-20AD HPLC workstation. X-ray crystallography analysis was performed on Agilent SuperNova X-ray diffractionmeter. Optical rotations were measured using a 1 mL cell with a 5dm path length on an INESA SGW-1 polarimeter and are reported as follows:  $[\alpha]_D^{25}$  (c in g per 100 mL solvent). Analytical thin-layer chromatography (TLC) was carried out on WFH-203 F254 pre-coated silica gel plate (0.2 mm thickness). Visualization was performed using a UV lamp or 2,4-Dinitrophenylhydrazine or potassium permanganate stain.

## II. X-ray crystallographic analysis

Method for single crystals cultivation: a pure solid sample (10–20 mg) was dissolved in dichloromethane/acetone/THF (2 mL) in a vial at room temperature, and petroleum ether/hexane (0.1 mL) was added into the above solution slowly while keeping the sample completely dissolved. The vial was properly sealed with parafilm and kept at room temperature to allow the slow evaporation of the solvents until a single crystal was obtained.

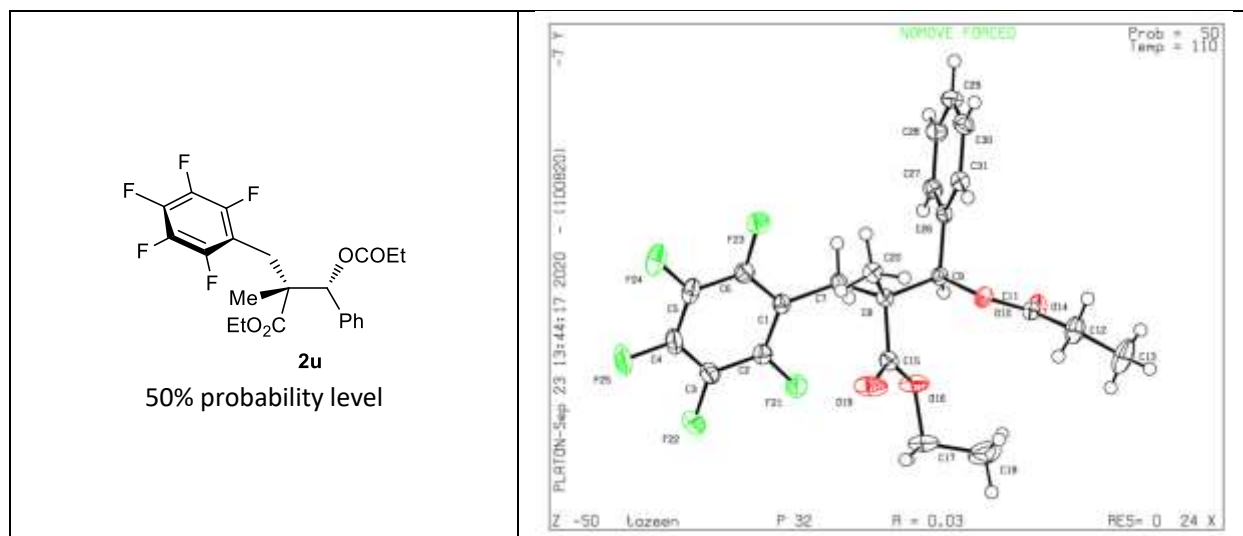

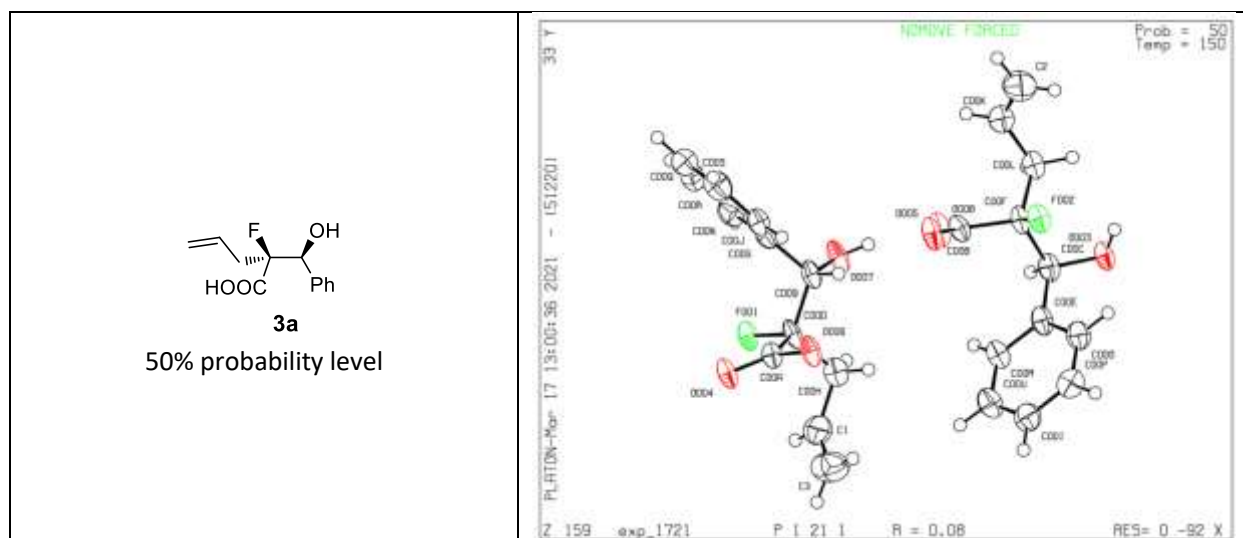

**Table 1 Crystal data and structure refinement for 2u.**

|                                    |                                                               |
|------------------------------------|---------------------------------------------------------------|
| Identification code                | 2u                                                            |
| Empirical formula                  | C <sub>22</sub> H <sub>21</sub> F <sub>5</sub> O <sub>4</sub> |
| Formula weight                     | 444.39                                                        |
| Temperature/K                      | 109.85(16)                                                    |
| Crystal system                     | trigonal                                                      |
| Space group                        | P3 <sub>2</sub>                                               |
| a/Å                                | 17.8769(9)                                                    |
| b/Å                                | 17.8769(9)                                                    |
| c/Å                                | 5.8193(6)                                                     |
| α/°                                | 90.00                                                         |
| β/°                                | 90.00                                                         |
| γ/°                                | 120.00                                                        |
| Volume/Å <sup>3</sup>              | 1610.58(19)                                                   |
| Z                                  | 3                                                             |
| ρ <sub>calc</sub> /cm <sup>3</sup> | 1.375                                                         |
| μ/mm <sup>-1</sup>                 | 0.676                                                         |
| F(000)                             | 690.0                                                         |
| Crystal size/mm <sup>3</sup>       | 0.15 × 0.01 × 0.01                                            |
| Radiation                          | Ga Kα (λ = 1.34050)                                           |
| 2θ range for data collection/°     | 4.96 to 120.98                                                |
| Index ranges                       | -23 ≤ h ≤ 23, -22 ≤ k ≤ 23, -4 ≤ l ≤ 7                        |
| Reflections collected              | 21941                                                         |
| Independent reflections            | 3736 [R <sub>int</sub> = 0.0424, R <sub>sigma</sub> = 0.0271] |
| Data/restraints/parameters         | 3736/1/284                                                    |
| Goodness-of-fit on F <sup>2</sup>  | 1.057                                                         |
| Final R indexes [I ≥ 2σ (I)]       | R <sub>1</sub> = 0.0277, wR <sub>2</sub> = 0.0705             |

Final R indexes [all data]  $R_1 = 0.0290$ ,  $wR_2 = 0.0713$   
 Largest diff. peak/hole /  $e \text{ \AA}^{-3}$  0.20/-0.17  
 Flack parameter 0.10(8)

**Table 1 Crystal data and structure refinement for 3a.**

|                                                |                                                                  |
|------------------------------------------------|------------------------------------------------------------------|
| Identification code                            | 3a                                                               |
| Empirical formula                              | $C_{12}H_{12}FO_3$                                               |
| Formula weight                                 | 223.226                                                          |
| Temperature/K                                  | 149.99(10)                                                       |
| Crystal system                                 | monoclinic                                                       |
| Space group                                    | $P2_1$                                                           |
| $a/\text{\AA}$                                 | 10.0078(5)                                                       |
| $b/\text{\AA}$                                 | 5.8787(2)                                                        |
| $c/\text{\AA}$                                 | 19.4922(10)                                                      |
| $\alpha/^\circ$                                | 90                                                               |
| $\beta/^\circ$                                 | 93.878(5)                                                        |
| $\gamma/^\circ$                                | 90                                                               |
| Volume/ $\text{\AA}^3$                         | 1144.15(9)                                                       |
| Z                                              | 4                                                                |
| $\rho_{\text{calc}}/\text{g/cm}^3$             | 1.296                                                            |
| $\mu/\text{mm}^{-1}$                           | 0.873                                                            |
| F(000)                                         | 469.8                                                            |
| Crystal size/ $\text{mm}^3$                    | $0.09 \times 0.05 \times 0.01$                                   |
| Radiation                                      | Cu $K\alpha$ ( $\lambda = 1.54184$ )                             |
| $2\Theta$ range for data collection/ $^\circ$  | 8.86 to 156.66                                                   |
| Index ranges                                   | $-11 \leq h \leq 12$ , $-7 \leq k \leq 7$ , $-24 \leq l \leq 22$ |
| Reflections collected                          | 9609                                                             |
| Independent reflections                        | 4335 [ $R_{\text{int}} = 0.0622$ , $R_{\text{sigma}} = 0.0742$ ] |
| Data/restraints/parameters                     | 4335/1/291                                                       |
| Goodness-of-fit on $F^2$                       | 1.036                                                            |
| Final R indexes [ $I \geq 2\sigma(I)$ ]        | $R_1 = 0.0821$ , $wR_2 = 0.2301$                                 |
| Final R indexes [all data]                     | $R_1 = 0.0930$ , $wR_2 = 0.2373$                                 |
| Largest diff. peak/hole / $e \text{ \AA}^{-3}$ | 0.56/-0.35                                                       |
| Flack parameter                                | 0.2(3)                                                           |

### III. General procedures for the preparation of substrates

#### 1. Typical procedure for the preparation of substrate 1a–1l, and 1t

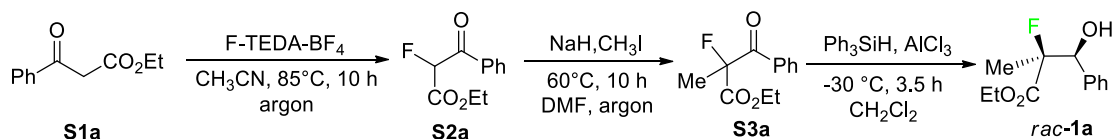

To a stirred suspension of F-TEDA-BF<sub>4</sub> (20 g, 57.2 mmol) in CH<sub>3</sub>CN (10 mL), β-ketoester **S1a** (10 g, 52.0 mmol) was introduced at room temperature under argon atmosphere. The reaction mixture was warmed to 85 °C and stirred for 10 h. The reaction mixture was filtered. The liquid phase concentrated and the residue was purified by chromatography on silica (petroleum ether/ethyl acetate, v:v = 100:1) to afford **S2a** (10.72 g, 99% yield).

To an oven dried flask sodium hydride (137 mg, 5.7 mmol) in DMF (15 mL) was added under argon at room temperature. After a few minutes stirring, **S2a** (1.0 g, 4.7 mmol) in DMF (5 mL) was added dropwise at the same temperature. After 10 min additional stirring, corresponding methyl iodide (1.35 g, 9.5 mmol) was introduced to the reaction mixture. The reaction mixture was warmed to 60 °C and stirred for 10 h. The reaction was quenched with water, and extracted with ethyl acetate (2 × 100 mL). The combined organic layers were dried over Na<sub>2</sub>SO<sub>4</sub> and concentrated under reduced pressure. The residue was purified by flash chromatography (petroleum ether/ethyl acetate, v:v = 20:1) to give **S3a** as yellow oil (0.76 g, 72% yield).

To the stirring solution of **S3a** (756 mg, 3.4 mmol) in CH<sub>2</sub>Cl<sub>2</sub> (15 mL) were added Ph<sub>3</sub>SiH (1.17 g, 4.5 mmol) and AlCl<sub>3</sub> at –30 °C. The reaction mixture was kept at this temperature for 3.5 h. The mixture was then diluted with Et<sub>2</sub>O (25 mL), and saturated NaHCO<sub>3</sub> was added. Aqueous layer was extracted with Et<sub>2</sub>O (2 × 100 mL), and the combine organic layer were washed with water and brine, and dried over Na<sub>2</sub>SO<sub>4</sub>. Purified by column chromatography (petroleum ether/ethyl acetate, v:v = 10:1) afforded *rac*-**1a** as colorless oil (0.64 g, 85% yield).

#### 2. Typical procedures for the synthesis of substrates 1m–1r, 1u, and 1v

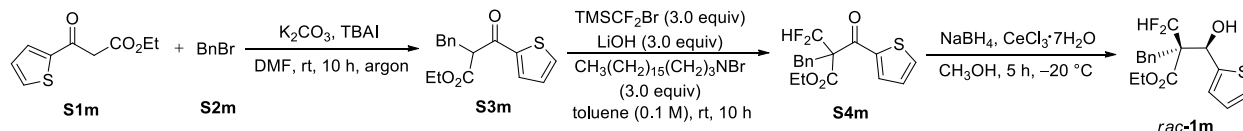

To the stirred suspension of potassium carbonate (1.04 g, 7.5 mmol) and tetra-*n*-butyl ammonium iodide (372 mg, 1.0 mmol) in DMF (10 mL), β-ketoester **S1m** (1.0 g, 5.0 mmol) was introduced at room temperature under argon atmosphere. After an additional 20 min stirring, benzyl bromide **S2m** (1.7 g, 10.1 mmol) was added at the same temperature. After stirring for 10 h, the reaction was quenched with water, and then extracted with ethyl acetate (2 × 20 mL). The organic layers were combined, dried over Na<sub>2</sub>SO<sub>4</sub> and concentrated under reduced pressure. The

residue was purified by flash column chromatography (petroleum ether/ethyl acetate, v:v = 20:1) to give the product **S3m** as a yellow oil (1.2 g, 85% yield).

The solution of **S3m** (1.2 g, 4.2 mmol), LiOH (0.3 g, 12.5 mmol), CH<sub>3</sub>(CH<sub>2</sub>)<sub>15</sub>(CH<sub>2</sub>)<sub>3</sub>NBr (3.03 g, 8.3 mmol) in 41 mL dry toluene was stirred at room temperature for 10 min. Then TMSCF<sub>2</sub>Br (2.53 g, 12.5 mmol) was added slowly, and the reaction mixture was stirred for 10 h at the same temperature. The reaction mixture was diluted with ethyl acetate, and washed with water and brine, dried over Na<sub>2</sub>SO<sub>4</sub> and concentrated under reduced pressure. Crude product was subjected to column chromatography on silica gel (petroleum ether/ethyl acetate, v:v = 20:1) to give **S4m** as a yellow oil (704 mg, 50% yield).

To the solution of **S4m** (704 mg, 1.8 mmol) in 3.5 mL methanol was added CeCl<sub>3</sub>·7H<sub>2</sub>O (1.01 g, 2.7 mmol) and the mixture was stirred at -20 °C for 10 min. Then NaBH<sub>4</sub> (75 mg, 1.99 mmol) was added in two batches. After stirring for 5 h, the reaction mixture was quenched with water and extracted with ethyl acetate (2 × 20 mL). The organic layers were combined, dried over Na<sub>2</sub>SO<sub>4</sub> and concentrated under reduced pressure. The residue was purified by flash column chromatography (petroleum ether/ethyl acetate, v:v = 10:1) to give the product *rac*-**1m** as a yellow oil (510 mg, 83% yield).

### 3. Typical procedures for the synthesis of substrate **1s**

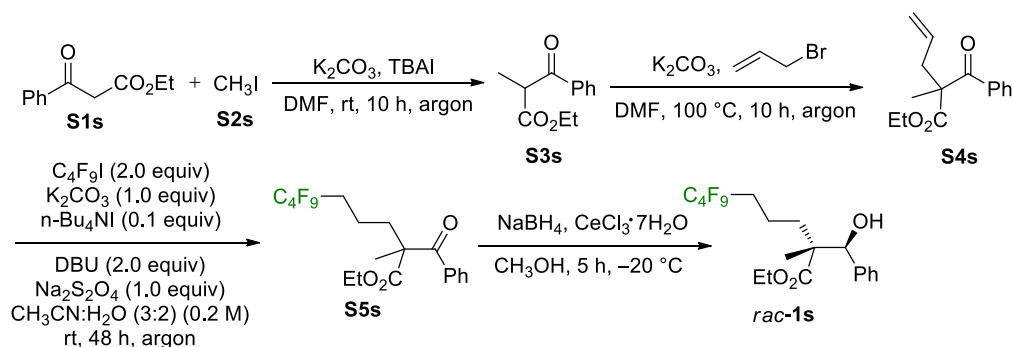

**S3s** was synthesized by the procedure of **S3m**. In an oven dried flask potassium carbonate (1.0 g, 7.2 mmol) and DMF (10 mL) was taken, then **S3s** (1.0 g, 4.8 mmol) was introduced to this suspension at room temperature under argon atmosphere. After an additional 20 min stirring, allyl bromide (0.7 g, 5.8 mmol) was added at the same temperature. The temperature was slowly rose up to 100 °C and continued stirring at this temperature for 10 h. Then the reaction was quenched with water, and extracted with ethyl acetate (2 × 20 mL). The organic layers were combined, dried over Na<sub>2</sub>SO<sub>4</sub> and concentrated under reduced pressure. The residue was purified by flash column chromatography (petroleum ether/ethyl acetate, v:v = 20:1) to give the product **S4s** as light brown oil (1.05 g, 88% yield).

In a sealed tube **S4s** (1.0 g, 4.06 mmol), C<sub>4</sub>F<sub>9</sub>I (2.8 g, 8.12 mmol), DBU (1.2 g, 8.12 mmol), K<sub>2</sub>CO<sub>3</sub> (0.56 g, 4.06 mmol), Na<sub>2</sub>S<sub>2</sub>O<sub>4</sub> (0.76 g, 4.06 mmol), and tetra-*n*-butyl ammonium iodide

(0.14 g, 0.406 mmol) was added to the mixture of 0.2 M solution of (3:2) acetonitrile and water. After stirring for 48 h at room temperature, the reaction mixture was diluted with water and extracted with ethyl acetate ( $2 \times 20$  mL) and washed with brine. The organic layers were combined, dried over  $\text{Na}_2\text{SO}_4$  and concentrated under reduced pressure. The residue was purified by flash column chromatography (petroleum ether/ethyl acetate, v:v = 20:1) to give the product **S5u** as dark brown (466 mg, 25% yield). Reduction procedure was same as **1m**.

#### IV. Typical procedures for the kinetic resolution.

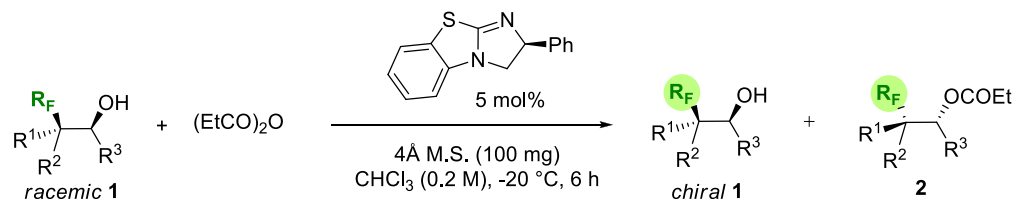

Under argon atmosphere, to a 50 mL Schlenk tube was taken substrate **1a** (452.5 mg, 2.0 mmol), 4 Å M.S (1000 mg) and catalyst (25.3 mg, 0.1 mmol). To this mixture 10 mL of  $\text{CHCl}_3$  was added and then propionic anhydride (0.13 mg, 1.0 mmol) was added dropwise via syringe and the resulting mixture was stirred for 6 h at  $-20^\circ\text{C}$ . After 6 h stirring the solvent was removed under reduced pressure and the residue was purified by flash chromatography with petroleum ether/ethyl acetate (v:v = 10:1) as eluent to afford the product **2a** (279 mg, 49% yield) and recovered chiral starting material **1a** (221 mg, 49% yield).

#### V. Procedures for the derivatizations.

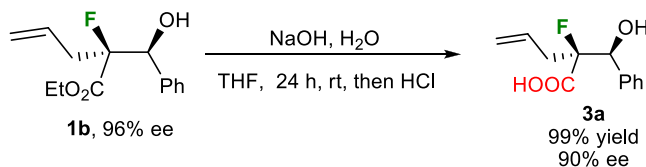

To the solution of **1b** (50.4 mg, 0.2 mmol) in alcohol and THF (0.4 mL), 1 M aqueous solution of NaOH was added to the reaction mixture. The reaction mixture was continued stirring for 24 h. After 24 h, the reaction was acidified with 2M HCl and extracted with  $\text{CH}_2\text{Cl}_2$ . The combine organic layer was washed with brine and dried over anhydrous  $\text{Na}_2\text{SO}_4$  and concentrated under reduce pressure to get **3a** (44.8 mg, 99% yield).

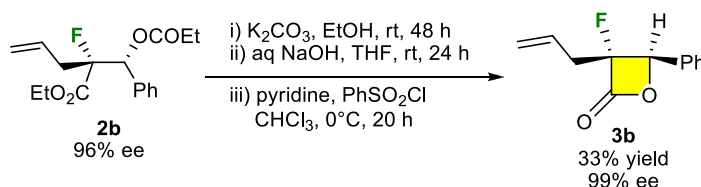

To the solution of **2b** (61.6 mg, 0.2 mmol) in EtOH (1 mL), K<sub>2</sub>CO<sub>3</sub> (138 mg, 1.0 mmol) was introduced at rt. After 48h, the solution was evaporated and the crude product was purified by flash chromatography with petroleum ether/ethyl acetate (v:v = 10:1) as eluent to afford the product (50.2 mg, 99% yield).

To the solution of  $\beta$ -hydroxy ester (50.2 mg, 0.2 mmol) in alcohol and THF (0.4 mL), 1M aqueous solution of NaOH was added to the reaction mixture. The reaction mixture was continued stirring for 24 h. After 24 h, the reaction was acidified with 2 M HCl and extracted with CH<sub>2</sub>Cl<sub>2</sub>. The combine organic layer was washed with brine and dried over anhydrous Na<sub>2</sub>SO<sub>4</sub> and concentrated under reduce pressure to get  $\beta$ -hydroxy acid (44.8 mg, 100% yield).

To the stirred solution of  $\beta$ -hydroxy acid **5b** (40.3 mg, 0.18 mmol) and pyridine (28.4 mg, 0.36 mmol) in CH<sub>2</sub>Cl<sub>2</sub> (0.2 M) at 0°C was slowly added benzenesulfonyl chloride (31.7 mg, 0.18 mmol). After 20 h, the mixture was evaporated and residue was extracted with hexane. Evaporation of hexane followed by recrystallization of impure lactone from hexane gave **3b** (12.5 mg, 33% yield).

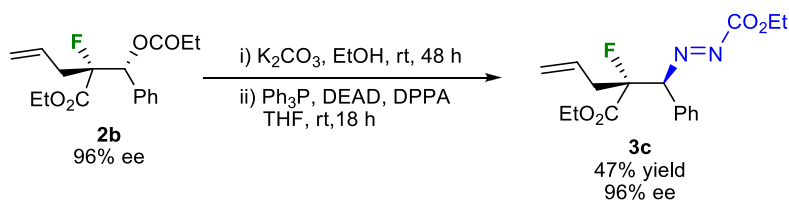

To the solution of **2b** (61.6 mg, 0.2 mmol) in EtOH (1 mL), K<sub>2</sub>CO<sub>3</sub> (138 mg, 1.0 mmol) was introduced at room temperature. After 48h, the solution was evaporated. The crude product was purified by flash chromatography with petroleum ether/ethyl acetate (v:v = 10:1) as eluent to afford the  $\beta$ -hydroxy ester (50.2 mg, 99% yield).  $\beta$ -Hydroxy ester (50.2 mg, 0.2 mmol) was dissolved in THF (0.5 mL). To this solution PPh<sub>3</sub> (86.5 mg, 0.33 mmol), DEAD (870 mg, 5.0 mmol) and DPPA (715 mg, 2.6 mmol) was successively added in this order. After stirring for 48 h at room temperature, the reaction was quenched by saturated NH<sub>4</sub>Cl and stirred for additional 5 min. The aqueous layer were extracted with Et<sub>2</sub>O and combine organic layer was dried over Na<sub>2</sub>SO<sub>4</sub>. After removal of solvent, the crude product was purified over column chromatography by using petroleum ether/ethyl acetate (v:v = 20:1) to give title compound **3c** (32.1 mg, 47% yield).

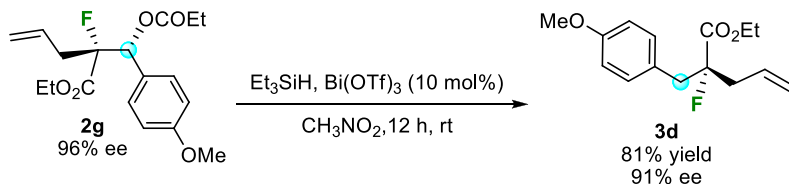

**2g** (169 mg, 0.5 mmol) and Et<sub>3</sub>SiH (580 mg, 5.0 mmol) were dissolved in nitromethane (2 mL). At ambient temperature Bi(OTf)<sub>3</sub> (32.8 mg, 0.05 mmol) was added in one portion and the



solution was stirred for the indicated time. After 12 h, the reaction was quenched by the addition of EtOAc/water (10:10 mL) and aqueous layer was extracted with ethyl acetate (2 × 20 mL). The combine organic layers were washed with water and brine, dried crude product over Na<sub>2</sub>SO<sub>4</sub> and solvent was removed under reduced pressure. The crude product was purified by flash column chromatography (cyclohexane/ethyl acetate 40:1) to get pure product **3d** (108 mg, 81% yield).

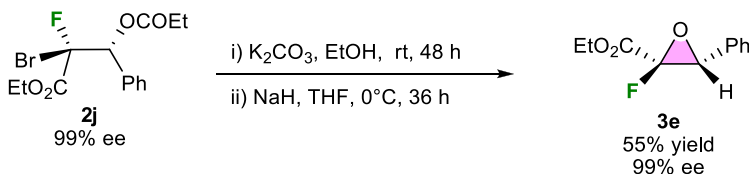

To the solution of **2j** (39.4 mg, 0.114 mmol) in EtOH (1 mL), K<sub>2</sub>CO<sub>3</sub> (138 mg, 1.0 mmol) was introduced at rt. After 48h, the solution was evaporated. The crude product was purified by flash chromatography with petroleum ether/ethyl acetate (v:v = 10:1) as eluent to afford the intermediate product (22.6 mg, 68.5% yield).

THF (1 mL) was added to NaH (1.6 mg, 0.065 mmol) at 0°C under argon atmosphere. β-Hydroxy ester (18.9 mg, 0.065 mmol) was dissolved in THF (0.9 mL) and added to the reaction flask. The reaction mixture was continued stirring for 36 h at the same temperature. After 36 h, the crude was directly subjected to the column chromatography by using petroleum ether/ethyl acetate (v:v = 20:1) to get pure epoxide **3e** (7.5 mg, 55% yield).

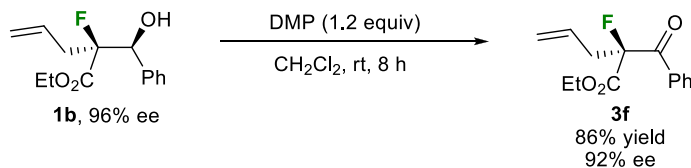

To the stirred solution of chiral **1b** (25.2 mg, 0.1 mmol) in CH<sub>2</sub>Cl<sub>2</sub> (0.5 mL), Dess-Martin periodinane (50.4 mg, 0.12 mmol) was added at room temperature. After stirring for 8 h at room temperature, the reaction mixture was quenched with saturated Na<sub>2</sub>S<sub>2</sub>O<sub>3</sub> and extracted with CH<sub>2</sub>Cl<sub>2</sub> (20 mL × 3). The combine organic layers were dried over Na<sub>2</sub>SO<sub>4</sub> and concentrated under reduced pressure. The residue was purified by flash column chromatography (petroleum ether/ethyl acetate, v:v = 20:1) to give product **3f** as a colorless oil (21.3 mg, 86% yield).

## VI. Characterizations of new compounds.

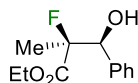

1a

**ethyl (2S,3S)-2-fluoro-3-hydroxy-2-methyl-3-phenylpropanoate (1a):** Purified by flash chromatography on silica gel (petroleum ether/ethyl acetate, v:v = 10:1), yellow oil, 221 mg, 49% yield. <sup>1</sup>H NMR (600 MHz, CDCl<sub>3</sub>) δ 7.44–7.30 (m, 5H), 4.96 (dd, *J* = 15.9, 5.0 Hz, 1H), 4.19–4.12 (m, 2H), 2.79 (d, *J* = 5.1 Hz, 1H), 1.61 (d, *J* = 22.2 Hz, 3H), 1.18 (t, *J* = 7.1 Hz, 3H); <sup>13</sup>C NMR (101 MHz, CDCl<sub>3</sub>) δ 170.9 (d, *J* = 23.9 Hz), 137.8, 128.7, 128.3, 127.7 (d, *J* = 1.6 Hz), 96.2 (d, *J* = 190.9 Hz), 76.4 (d, *J* = 22.8 Hz), 61.9, 19.5 (d, *J* = 23.7 Hz), 14.1; <sup>19</sup>F NMR (376 MHz, CDCl<sub>3</sub>) δ -165.3 (qd, *J* = 22.2, 15.9 Hz, 1F). HRMS (ESI-Quadrupole-Orbitrap) *m/z*: [M + Na]<sup>+</sup> Calcd for C<sub>12</sub>H<sub>15</sub>O<sub>3</sub>FNa 249.0897; Found 249.0895. [α]<sub>D</sub><sup>29</sup>: -382.6 (c 1.0, CHCl<sub>3</sub>); HPLC analysis: 99% *ee* (Chiralcel AD-H, 10:90 <sup>i</sup>PrOH/Hexanes, 1 mL/min), R<sub>t</sub> (major) = 15.4 min, R<sub>t</sub> (minor) = 18.0 min. IR (KBr thin film, cm<sup>-1</sup>): ν 3478, 2990, 2337, 1743, 1449, 1321, 1055, 699.

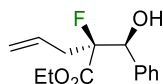

1b

**ethyl (S)-2-fluoro-2-((S)-hydroxy(phenyl)methyl)pent-4-enoate (1b):** Purified by flash chromatography on silica gel (petroleum ether/ethyl acetate, v:v = 10:1), yellow oil, 255 mg, 51% yield. <sup>1</sup>H NMR (600 MHz, CDCl<sub>3</sub>) δ 7.38–7.36 (m, 2H), 7.35–7.31 (m, 3H), 5.83–5.75 (m, 1H), 5.19–5.13 (m, 2H), 4.94 (d, *J* = 18.7 Hz, 1H), 4.12–4.05 (m, 2H), 2.91–2.84 (m, 1H), 2.80–2.64 (m, 2H), 1.11 (t, *J* = 7.2 Hz, 3H); <sup>13</sup>C NMR (101 MHz, CDCl<sub>3</sub>) δ 169.5 (d, *J* = 24.5 Hz), 137.7, 130.7 (d, *J* = 4.0 Hz), 128.7, 128.4, 127.7, 120.0, 98.5 (d, *J* = 196.7 Hz), 76.3 (d, *J* = 21.4 Hz), 61.7, 38.3 (d, *J* = 21.8 Hz), 14.1; <sup>19</sup>F NMR (376 MHz, CDCl<sub>3</sub>) δ -176.5 (ddd, *J* = 34.4, 18.8, 11.0 Hz, 1F). HRMS (ESI-Quadrupole-Orbitrap) *m/z*: [M + Na]<sup>+</sup> Calcd for C<sub>14</sub>H<sub>17</sub>O<sub>3</sub>FNa 275.1054; Found 275.1053. [α]<sub>D</sub><sup>29</sup>: -333.5 (c 1.0, CHCl<sub>3</sub>); HPLC analysis: 96% *ee* (Chiralcel AD-H, 10:90 <sup>i</sup>PrOH/Hexanes, 1 mL/min), R<sub>t</sub> (major) = 13.0 min, R<sub>t</sub> (minor) = 17.1 min. IR (KBr thin film, cm<sup>-1</sup>): ν 3692, 2921, 2351, 2351, 1739, 1460, 1218, 1017, 696, 606.

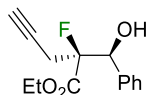

1c

**ethyl (S)-2-fluoro-2-((S)-hydroxy(phenyl)methyl)pent-4-ynoate (1c):** Purified by flash chromatography on silica gel (petroleum ether/ethyl acetate, v:v = 10:1), yellow oil, 262 mg, 52% yield. <sup>1</sup>H NMR (400 MHz, CDCl<sub>3</sub>) δ 7.42–7.28 (m, 5H), 5.00 (dd, *J* = 17.8, 2.0 Hz, 1H), 4.23–4.07 (m, 2H), 3.11–2.88 (m, 3H), 2.09 (d, *J* = 2.2 Hz, 1H), 1.14 (td, *J* = 7.1, 1.5 Hz, 3H); <sup>13</sup>C

NMR (151 MHz, CDCl<sub>3</sub>)  $\delta$  168.6 (d,  $J$  = 24.0 Hz), 137.1, 128.9, 128.5, 127.6, 96.9 (d,  $J$  = 200.5 Hz), 77.3 (d,  $J$  = 4.4 Hz), 75.7 (d,  $J$  = 20.8 Hz), 72.0, 62.2, 24.7 (d,  $J$  = 24.2 Hz), 14.1; <sup>19</sup>F NMR (376 MHz, CDCl<sub>3</sub>)  $\delta$  -176.3 – -176.4 (m, 1F). HRMS (ESI-Quadrupole-Orbitrap)  $m/z$ : [M + Na]<sup>+</sup> Calcd for C<sub>14</sub>H<sub>15</sub>O<sub>3</sub>FNa 273.0897; Found 273.0895. [ $\alpha$ ]<sub>D</sub><sup>29</sup>: -286.2 (c 1.0, CHCl<sub>3</sub>); HPLC analysis: 91% *ee* (Chiralcel AD-H, 10:90 *i*PrOH/Hexanes, 1 mL/min), R<sub>t</sub> (major) = 13.4 min, R<sub>t</sub> (minor) = 20.3 min. IR (KBr thin film, cm<sup>-1</sup>):  $\nu$  3647, 3305, 2987, 2323, 1736, 1335, 1221, 1035, 696.

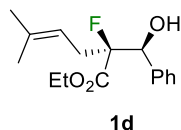

**ethyl (S)-2-fluoro-2-((S)-hydroxy(phenyl)methyl)-5-methylhex-4-enoate (1d):** Purified by flash chromatography on silica gel (petroleum ether/ethyl acetate, v:v = 10:1), yellow oil, 232 mg, 41% yield. <sup>1</sup>H NMR (600 MHz, CDCl<sub>3</sub>)  $\delta$  7.41–7.29 (m, 5H), 5.25 (t,  $J$  = 7.2 Hz, 1H), 4.95 (dd,  $J$  = 18.5, 4.8 Hz, 1H), 4.07 (q,  $J$  = 7.1 Hz, 2H), 2.82–2.70 (m, 3H), 1.70 (s, 3H), 1.61 (s, 3H), 1.11 (t,  $J$  = 7.2 Hz, 3H); <sup>13</sup>C NMR (151 MHz, CDCl<sub>3</sub>)  $\delta$  169.9 (d,  $J$  = 24.5 Hz), 137.9, 136.8, 128.7, 128.4, 127.8, 115.9 (d,  $J$  = 3.5 Hz), 98.9 (d,  $J$  = 196.3 Hz), 76.4 (d,  $J$  = 21.5 Hz), 61.7, 32.7 (d,  $J$  = 21.8 Hz), 26.1, 18.1, 14.1; <sup>19</sup>F NMR (376 MHz, CDCl<sub>3</sub>)  $\delta$  -176.2 – -176.5 (m, 1F). HRMS (ESI-Quadrupole-Orbitrap)  $m/z$ : [M + Na]<sup>+</sup> Calcd for C<sub>16</sub>H<sub>21</sub>O<sub>3</sub>FNa 303.1367; Found 303.1365. [ $\alpha$ ]<sub>D</sub><sup>29</sup>: -345.9 (c 1.0, CHCl<sub>3</sub>); HPLC analysis: 99% *ee* (Chiralcel AD-H, 10:90 *i*PrOH/Hexanes, 1 mL/min), R<sub>t</sub> (major) = 6.4 min, R<sub>t</sub> (minor) = 5.2 min. IR (KBr thin film, cm<sup>-1</sup>):  $\nu$  3650, 2925, 2966, 2361, 1743, 1466, 1048, 710, 572.

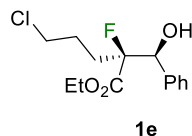

**ethyl (S)-5-chloro-2-fluoro-2-((S)-hydroxy(phenyl)methyl)pentanoate (1e):** Purified by flash chromatography on silica gel (petroleum ether/ethyl acetate, v:v = 10:1), white solid, mp 58–60 °C, 273 mg, 48% yield. <sup>1</sup>H NMR (400 MHz, CDCl<sub>3</sub>)  $\delta$  7.42–7.30 (m, 5H), 4.92 (dd,  $J$  = 19.1, 5.6 Hz, 1H), 4.20–4.05 (m, 2H), 3.60–3.46 (m, 2H), 2.64 (d,  $J$  = 5.3 Hz, 1H), 2.33–2.09 (m, 2H), 2.06–1.92 (m, 1H), 1.79–1.66 (m, 1H), 1.13 (t,  $J$  = 7.1 Hz, 3H); <sup>13</sup>C NMR (101 MHz, CDCl<sub>3</sub>)  $\delta$  169.7 (d,  $J$  = 24.5 Hz), 137.7, 128.9, 128.4, 127.7 (d,  $J$  = 7.3 Hz), 98.8 (d,  $J$  = 196.1 Hz), 76.6 (d,  $J$  = 21.1 Hz), 61.9, 44.6, 31.3 (d,  $J$  = 22.1 Hz), 26.7 (d,  $J$  = 3.5 Hz), 14.1; <sup>19</sup>F NMR (376 MHz, CDCl<sub>3</sub>)  $\delta$  -177.2 (ddd,  $J$  = 35.1, 19.1, 9.7 Hz, 1F). HRMS (ESI-Quadrupole-Orbitrap)  $m/z$ : [M + Na]<sup>+</sup> Calcd for C<sub>14</sub>H<sub>18</sub>O<sub>3</sub>ClFNa 311.0821; Found 311.0820. [ $\alpha$ ]<sub>D</sub><sup>29</sup>: -668.7 (c 1.0, CHCl<sub>3</sub>); HPLC analysis: 92% *ee* (Chiralcel AD-H, 10:90 *i*PrOH/Hexanes, 1 mL/min), R<sub>t</sub> (major) = 7.0 min, R<sub>t</sub> (minor) = 6.0 min. IR (KBr thin film, cm<sup>-1</sup>):  $\nu$  3668, 3301, 3142, 2973, 2368, 1746, 1536, 1266, 734, 706.

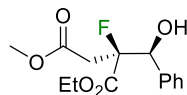

1f

**1-ethyl 4-methyl (S)-2-fluoro-2-((S)-hydroxy(phenyl)methyl)succinate (1f):** Purified by flash chromatography on silica gel (petroleum ether/ethyl acetate, v:v = 10:1), white solid, mp 120–122 °C, 275 mg, 49% yield. <sup>1</sup>H NMR (600 MHz, CDCl<sub>3</sub>) δ 7.42–7.30 (m, 5H), 4.93 (dd, *J* = 17.6, 5.1 Hz, 1H), 4.15 (qd, *J* = 7.1, 1.0 Hz, 2H), 3.68 (s, 3H), 3.21–3.05 (m, 2H), 3.02 (s, 1H), 1.14 (t, *J* = 7.1 Hz, 3H); <sup>13</sup>C NMR (151 MHz, CDCl<sub>3</sub>) δ 169.5, 169.4 (d, *J* = 26.1 Hz), 137.0, 129.0, 128.4, 127.6, 95.8 (d, *J* = 199.1 Hz), 76.1 (d, *J* = 20.1 Hz), 62.2, 52.3, 38.6 (d, *J* = 23.6 Hz), 13.9; <sup>19</sup>F NMR (376 MHz, CDCl<sub>3</sub>) δ -173.3 (ddd, *J* = 30.5, 17.5, 12.1 Hz, 1F). HRMS (ESI-Quadrupole-Orbitrap) *m/z*: [M + Na]<sup>+</sup> Calcd for C<sub>14</sub>H<sub>17</sub>O<sub>5</sub>FNa 307.0952; Found 307.0950. [α]<sub>D</sub><sup>29</sup>: -758.1 (c 1.0, CHCl<sub>3</sub>); HPLC analysis: 97% *ee* (Chiralcel AD-H, 10:90 *i*PrOH/Hexanes, 1 mL/min), R<sub>t</sub> (major) = 8.3 min, R<sub>t</sub> (minor) = 10.8 min. IR (KBr thin film, cm<sup>-1</sup>): ν 3650, 3298, 2939, 2361, 1743, 155, 1194, 751.

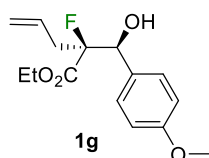

1g

**ethyl (S)-2-fluoro-2-((S)-hydroxy(4-methoxyphenyl)methyl)pent-4-enoate (1g):** Purified by flash chromatography on silica gel (petroleum ether/ethyl acetate, v:v = 10:1), colorless oil, 275 mg, 49% yield. <sup>1</sup>H NMR (400 MHz, CDCl<sub>3</sub>) δ 7.34–7.27 (m, 2H), 6.88 (d, *J* = 8.6 Hz, 2H), 5.75–5.63 (m, 1H), 5.15–5.02 (m, 2H), 4.87 (dd, *J* = 21.9, 6.7 Hz, 1H), 4.25 (q, *J* = 7.1 Hz, 2H), 3.79 (s, 3H), 3.00 (d, *J* = 6.8 Hz, 1H), 2.51 (ddd, *J* = 34.9, 14.6, 8.3 Hz, 1H), 2.31–2.18 (m, 1H), 1.28 (t, *J* = 7.1 Hz, 3H); <sup>13</sup>C NMR (101 MHz, CDCl<sub>3</sub>) δ 170.2 (d, *J* = 25.8 Hz), 159.8, 130.1 (d, *J* = 3.4 Hz), 129.9, 129.2 (d, *J* = 2.1 Hz), 119.8, 113.7, 98.8 (d, *J* = 197.4 Hz), 76.4 (d, *J* = 20.3 Hz), 61.9, 55.3, 38.9 (d, *J* = 21.3 Hz), 14.2; <sup>19</sup>F NMR (376 MHz, CDCl<sub>3</sub>) δ -180.5 (ddd, *J* = 34.1, 21.4, 12.0 Hz, 1F). HRMS (ESI-Quadrupole-Orbitrap) *m/z*: [M + Na]<sup>+</sup> Calcd for C<sub>15</sub>H<sub>19</sub>O<sub>4</sub>FNa 305.1160; Found 305.1154. [α]<sub>D</sub><sup>29</sup>: +233.4 (c 1.0, CHCl<sub>3</sub>); HPLC analysis: 99% *ee* (Chiralcel AD-H, 10:90 *i*PrOH/Hexanes, 1 mL/min), R<sub>t</sub> (major) = 10.3 min, R<sub>t</sub> (minor) = 13.2 min. IR (KBr thin film, cm<sup>-1</sup>): ν 3671, 2935, 2313, 1736, 1511, 1245, 1038, 748.

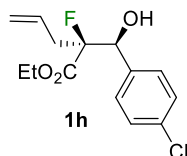

1h

**ethyl (S)-2-((S)-(4-chlorophenyl)(hydroxy)methyl)-2-fluoropent-4-enoate (1h):** Purified by flash chromatography on silica gel (petroleum ether/ethyl acetate, v:v = 10:1), colorless oil, 275

mg, 49% yield.  $^1\text{H}$  NMR (600 MHz,  $\text{CDCl}_3$ )  $\delta$  7.39–7.29 (m, 4H), 5.75–5.64 (m, 1H), 5.15–5.09 (m, 2H), 4.92 (dd,  $J = 19.9, 7.3$  Hz, 1H), 4.26 (qd,  $J = 7.1, 1.5$  Hz, 2H), 2.90 (dd,  $J = 32.7, 7.3$  Hz, 1H), 2.56 (ddd,  $J = 34.1, 14.5, 8.2$  Hz, 1H), 2.33–2.24 (m, 1H), 1.27 (td,  $J = 7.2, 1.0$  Hz, 3H);  $^{13}\text{C}$  NMR (151 MHz,  $\text{CDCl}_3$ )  $\delta$  170.0 (d,  $J = 25.2$  Hz), 136.2, 134.7, 129.8 (d,  $J = 2.3$  Hz), 129.3, 128.7, 120.4, 98.3 (d,  $J = 198.1$  Hz), 76.1 (d,  $J = 21.2$  Hz), 62.2, 38.9 (d,  $J = 21.5$  Hz), 14.3;  $^{19}\text{F}$  NMR (376 MHz,  $\text{CDCl}_3$ )  $\delta$  -178.4 (ddd,  $J = 32.9, 17.9, 14.0$  Hz, 1F). HRMS (ESI-Quadrupole-Orbitrap)  $m/z$ :  $[\text{M} + \text{Na}]^+$  Calcd for  $\text{C}_{14}\text{H}_{16}\text{O}_3\text{ClFNa}$  309.0664; Found 309.0663.  $[\alpha]_{\text{D}}^{29}$ : +118.7 (c 1.0,  $\text{CHCl}_3$ ); HPLC analysis: 93% *ee* (Chiralcel AD-H, 10:90 *i*PrOH/Hexanes, 1 mL/min),  $R_t$  (major) = 5.6 min,  $R_t$  (minor) = 6.2 min. IR (KBr thin film,  $\text{cm}^{-1}$ ):  $\nu$  3685, 2980, 2323, 1739, 1487, 1228, 1090, 1010, 737.

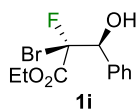

**ethyl (2*R*,3*R*)-2-bromo-2-fluoro-3-hydroxy-3-phenylpropanoate (1i):** Purified by flash chromatography on silica gel (petroleum ether/ethyl acetate, v:v = 10:1), white solid, mp 80–83 °C, 285 mg, 49% yield.  $^1\text{H}$  NMR (400 MHz,  $\text{CDCl}_3$ )  $\delta$  7.52–7.46 (m, 2H), 7.46–7.37 (m, 3H), 5.29 (dd,  $J = 20.5, 6.4$  Hz, 1H), 4.40 (q,  $J = 7.1$  Hz, 2H), 2.91 (d,  $J = 6.6$  Hz, 1H), 1.37 (t,  $J = 7.1$  Hz, 3H);  $^{13}\text{C}$  NMR (101 MHz,  $\text{CDCl}_3$ )  $\delta$  166.1 (d,  $J = 27.1$  Hz), 135.5, 129.3, 128.8 (d,  $J = 15.7$  Hz), 128.3, 98.1 (d,  $J = 275.1$  Hz), 78.1 (d,  $J = 20.3$  Hz), 63.6, 13.9;  $^{19}\text{F}$  NMR (376 MHz,  $\text{CDCl}_3$ )  $\delta$  -136.8 (d,  $J = 20.6$  Hz, 1F). HRMS (ESI-Quadrupole-Orbitrap)  $m/z$ :  $[\text{M} + \text{Na}]^+$  Calcd for  $\text{C}_{11}\text{H}_{12}\text{O}_3\text{BrFNa}$  312.9846; Found 312.9843.  $[\alpha]_{\text{D}}^{29}$ : +142.3 (c 1.0,  $\text{CHCl}_3$ ); HPLC analysis: 91% *ee* (Chiralcel AD-H, 10:90 *i*PrOH/Hexanes, 1 mL/min),  $R_t$  (major) = 20.3 min,  $R_t$  (minor) = 16.2 min. IR (KBr thin film,  $\text{cm}^{-1}$ ):  $\nu$  3671, 3315, 2310, 1760, 1584, 1270, 1031, 751, 692, 589.

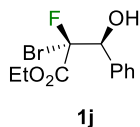

**ethyl (2*R*,3*S*)-2-bromo-2-fluoro-3-hydroxy-3-phenylpropanoate (1j):** Purified by flash chromatography on silica gel (petroleum ether/ethyl acetate, v:v = 10:1), colorless oil, 289 mg, 50% yield.  $^1\text{H}$  NMR (400 MHz,  $\text{CDCl}_3$ )  $\delta$  7.47–7.39 (m, 2H), 7.39–7.30 (m, 3H), 5.23 (dd,  $J = 18.9, 3.1$  Hz, 1H), 4.24 (q,  $J = 7.1$  Hz, 2H), 3.21 (d,  $J = 3.0$  Hz, 1H), 1.23 (t,  $J = 7.1$  Hz, 3H);  $^{13}\text{C}$  NMR (151 MHz,  $\text{CDCl}_3$ )  $\delta$  165.4 (d,  $J = 25.3$  Hz), 134.8, 129.4, 128.4, 128.3, 100.2 (d,  $J = 275.4$  Hz), 77.3 (d,  $J = 19.8$  Hz), 63.4, 13.8;  $^{19}\text{F}$  NMR (376 MHz,  $\text{CDCl}_3$ )  $\delta$  -131.1 (d,  $J = 18.9$  Hz, 1F). HRMS (ESI-Quadrupole-Orbitrap)  $m/z$ :  $[\text{M} + \text{Na}]^+$  Calcd for  $\text{C}_{11}\text{H}_{12}\text{O}_3\text{BrFNa}$  312.9846; Found 312.9843.  $[\alpha]_{\text{D}}^{29}$ : -125.2 (c 1.0,  $\text{CHCl}_3$ ); HPLC analysis: 94% *ee* (Chiralcel AD-H, 10:90 *i*PrOH/Hexanes, 1 mL/min),  $R_t$  (major) = 14.7 min,  $R_t$  (minor) = 15.5 min. IR (KBr thin film,  $\text{cm}^{-1}$ ):  $\nu$  3671, 3315, 2310, 1760, 1584, 1270, 1031, 751, 692, 589.

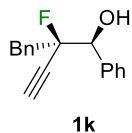

**(1S,2R)-2-benzyl-2-fluoro-1-phenylbut-3-yn-1-ol (1k):** Purified by flash chromatography on silica gel (petroleum ether/ethyl acetate, v:v = 10:1), yellow oil, 245 mg, 49% yield. <sup>1</sup>H NMR (600 MHz, CDCl<sub>3</sub>) δ 7.57–7.48 (m, 2H), 7.42–7.37 (m, 3H), 7.34–7.27 (m, 5H), 4.85 (d, *J* = 13.9 Hz, 1H), 3.15–3.01 (m, 2H), 2.69 (s, 1H), 2.68 (s, 1H); <sup>13</sup>C NMR (101 MHz, CDCl<sub>3</sub>) δ 137.6, 137.6, 134.6, 130.9, 128.8, 128.3, 128.2, 127.2, 94.8 (d, *J* = 178.2 Hz), 79.8 (d, *J* = 9.4 Hz), 79.5 (d, *J* = 29.3 Hz), 77.7 (d, *J* = 24.3 Hz), 41.9 (d, *J* = 23.7 Hz); <sup>19</sup>F NMR (376 MHz, CDCl<sub>3</sub>) δ -151.3 – -151.5 (m, 1F). HRMS (ESI-Quadrupole-Orbitrap) *m/z*: [M + Na]<sup>+</sup> Calcd for C<sub>17</sub>H<sub>15</sub>OFNa 277.0999; Found 277.0994. [α]<sub>D</sub><sup>29</sup>: -410.1 (c 1.0, CHCl<sub>3</sub>); HPLC analysis: 99% *ee* (Chiralcel AD-H, 10:90 *i*PrOH/Hexanes, 1 mL/min), R<sub>t</sub> (major) = 6.2 min, R<sub>t</sub> (minor) = 7.0 min. IR (KBr thin film, cm<sup>-1</sup>): ν 3675, 3294, 2379, 1726, 1539, 1263, 1021, 744, 696.

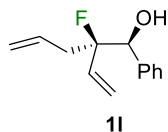

**(1S,2R)-2-fluoro-1-phenyl-2-vinylpent-4-en-1-ol (1l):** Purified by flash chromatography on silica gel (petroleum ether/ethyl acetate, v:v = 10:1), yellow oil, 192 mg, 47% yield. <sup>1</sup>H NMR (400 MHz, CDCl<sub>3</sub>) δ 7.43–7.29 (m, 5H), 5.83–5.67 (m, 2H), 5.41–5.28 (m, 2H), 5.13–5.05 (m, 2H), 4.76 (dd, *J* = 13.0, 2.5 Hz, 1H), 2.70 (ddd, *J* = 14.7, 14.7, 7.1 Hz, 1H), 2.47 (d, *J* = 2.5 Hz, 1H), 2.29 (ddd, *J* = 31.9, 14.7, 7.1 Hz, 1H); <sup>13</sup>C NMR (101 MHz, CDCl<sub>3</sub>) δ 138.4 (d, *J* = 3.7 Hz), 136.1 (d, *J* = 20.5 Hz), 132.0 (d, *J* = 4.5 Hz), 128.3, 128.1, 127.9 (d, *J* = 1.4 Hz), 118.8, 116.8 (d, *J* = 11.7 Hz), 98.9 (d, *J* = 182.1 Hz), 78.1 (d, *J* = 25.0 Hz), 38.3 (d, *J* = 21.9 Hz); <sup>19</sup>F NMR (376 MHz, CDCl<sub>3</sub>) δ -169.0 (ddd, *J* = 31.9, 14.7, 13.0 Hz, 1F). HRMS (ESI-Quadrupole-Orbitrap) *m/z*: [M + Na]<sup>+</sup> Calcd for C<sub>13</sub>H<sub>15</sub>OFNa 229.0999; Found 229.0996. [α]<sub>D</sub><sup>29</sup>: -565.3 (c 1.0, CHCl<sub>3</sub>); HPLC analysis: 99% *ee* (Chiralcel AD-H, 10:90 *i*PrOH/Hexanes, 1 mL/min), R<sub>t</sub> (major) = 13.1 min, R<sub>t</sub> (minor) = 17.1 min. IR (KBr thin film, cm<sup>-1</sup>): ν 3654, 3312, 2379, 1695, 1543, 1273, 755.

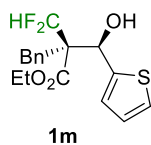

**ethyl (2S,3R)-2-benzyl-2-(difluoromethyl)-3-hydroxy-3-(thiophen-2-yl)propanoate (1m):** Purified by flash chromatography on silica gel (petroleum ether/ethyl acetate, v:v = 10:1), yellow oil, 342 mg, 49% yield. <sup>1</sup>H NMR (600 MHz, CDCl<sub>3</sub>) δ 7.34 (dd, *J* = 5.0, 1.1 Hz, 1H), 7.26–7.22 (m, 3H), 7.17–7.14 (m, 2H), 7.11–7.09 (m, 1H), 7.02–6.99 (m, 1H), 6.08 (t, *J* = 54.4 Hz, 1H), 5.52 (d, *J* = 4.9 Hz, 1H), 4.25–4.15 (m, 2H), 3.37 (dd, *J* = 4.9, 3.5 Hz, 1H), 3.24 (dd, *J* = 13.9,

2.5 Hz, 1H), 2.99 (d,  $J = 14.1$  Hz, 1H), 1.21 (t,  $J = 7.2$  Hz, 3H);  $^{13}\text{C}$  NMR (151 MHz,  $\text{CDCl}_3$ )  $\delta$  170.7 (d,  $J = 5.3$  Hz), 142.0, 135.1, 130.4, 128.5, 127.3, 127.1, 126.4, 126.1, 116.9 (dd,  $J = 246.7$ , 246.7 Hz), 70.6, 62.0, 59.4 (t,  $J = 17.7$  Hz), 35.7, 14.0;  $^{19}\text{F}$  NMR (376 MHz,  $\text{CDCl}_3$ )  $\delta$  -126.2 (dd,  $J = 283.3$ , 55.1 Hz, 1F), -127.2 (dd,  $J = 283.0$ , 54.2 Hz, 1H). HRMS (ESI-Quadrupole-Orbitrap)  $m/z$ :  $[\text{M} + \text{Na}]^+$  Calcd for  $\text{C}_{17}\text{H}_{18}\text{F}_2\text{O}_3\text{SNa}$  363.0837; Found 363.0840.  $[\alpha]_{\text{D}}^{29}$ : -219.3 (c 1.0,  $\text{CHCl}_3$ ); HPLC analysis: 98% *ee* (Chiralcel AD-H, 10:90  $i$ PrOH/Hexanes, 1 mL/min),  $R_t$  (major) = 29.9 min,  $R_t$  (minor) = 33.5 min. IR (KBr thin film,  $\text{cm}^{-1}$ ):  $\nu$  3650, 3308, 2935, 2310, 1736, 1543, 1270, 1024, 751.

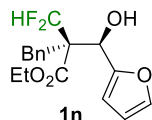

**ethyl (2*S*,3*R*)-2-benzyl-2-(difluoromethyl)-3-(furan-2-yl)-3-hydroxypropanoate (1n):**

Purified by flash chromatography on silica gel (petroleum ether/ethyl acetate, v:v = 10:1), yellow oil, 354 mg, 54% yield.  $^1\text{H}$  NMR (400 MHz,  $\text{CDCl}_3$ )  $\delta$  7.39–7.24 (m, 6H), 6.97–6.95 (m, 2H), 5.86 (dd,  $J = 54.0$ , 54.0 Hz, 1H), 5.21 (d,  $J = 6.4$  Hz, 1H), 4.20 (q,  $J = 7.1$  Hz, 2H), 3.97 (d,  $J = 6.5$  Hz, 1H), 3.45 (d,  $J = 14.0$  Hz, 1H), 3.35 (d,  $J = 14.0$  Hz, 1H), 1.19 (t,  $J = 7.2$  Hz, 3H);  $^{13}\text{C}$  NMR (101 MHz,  $\text{CDCl}_3$ )  $\delta$  171.6, 143.2, 135.3, 130.9, 128.4, 127.3, 126.7, 126.4, 125.7, 116.1 (t,  $J = 246.6$  Hz), 70.9 (d,  $J = 3.9$  Hz), 62.3, 59.3 (t,  $J = 18.2$  Hz), 35.8, 13.9;  $^{19}\text{F}$  NMR (376 MHz,  $\text{CDCl}_3$ )  $\delta$  -125.9 (dd,  $J = 285.1$ , 54.1 Hz, 1F), -127.2 (dd,  $J = 285.0$ , 54.1 Hz, 1H). HRMS (ESI-Quadrupole-Orbitrap)  $m/z$ :  $[\text{M} + \text{Na}]^+$  Calcd for  $\text{C}_{17}\text{H}_{18}\text{F}_2\text{O}_4\text{Na}$  347.3235; Found 347.3236.  $[\alpha]_{\text{D}}^{29}$ : -464.6 (c 1.0,  $\text{CHCl}_3$ ); HPLC analysis: 80% *ee* (Chiralcel AD-H, 10:90  $i$ PrOH/Hexanes, 1 mL/min),  $R_t$  (major) = 21.5 min,  $R_t$  (minor) = 23.6 min. IR (KBr thin film,  $\text{cm}^{-1}$ ):  $\nu$  3650, 3305, 2925, 2327, 1726, 1539, 1263, 1028, 751, 696.

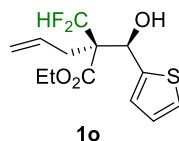

**ethyl (S)-2-(difluoromethyl)-2-((R)-hydroxy(thiophen-2-yl)methyl)pent-4-enoate (1o):**

Purified by flash chromatography on silica gel (petroleum ether/ethyl acetate, v:v = 10:1), yellow oil, 285 mg, 49% yield.  $^1\text{H}$  NMR (400 MHz,  $\text{CDCl}_3$ )  $\delta$  7.29 (d,  $J = 5.1$  Hz, 1H), 7.05–6.94 (m, 2H), 6.27 (dd,  $J = 55.0$ , 55.0 Hz, 1H), 5.99–5.82 (m, 1H), 5.33 (d,  $J = 7.1$  Hz, 1H), 5.16–5.06 (m, 2H), 4.33–4.19 (m, 2H), 3.41–3.33 (m, 1H), 2.79–2.60 (m, 1H), 2.43 (dd,  $J = 14.7$ , 8.2 Hz, 1H), 1.29 (t,  $J = 7.0$  Hz, 3H);  $^{13}\text{C}$  NMR (101 MHz,  $\text{CDCl}_3$ )  $\delta$  170.6 (d,  $J = 8.5$  Hz), 142.1, 132.6, 126.6 (d,  $J = 5.8$  Hz), 125.9, 119.3, 117.2 (t,  $J = 247.7$  Hz), 71.4, 62.3, 58.4, 33.2, 14.1;  $^{19}\text{F}$  NMR (376 MHz,  $\text{CDCl}_3$ )  $\delta$  -125.9 (dd,  $J = 284.4$ , 55.0 Hz, 1F), -127.7 (dd,  $J = 284.4$ , 54.8 Hz, 1F). HRMS (ESI-Quadrupole-Orbitrap)  $m/z$ :  $[\text{M} + \text{Na}]^+$  Calcd for  $\text{C}_{13}\text{H}_{16}\text{O}_3\text{F}_2\text{NaS}$  313.0680; Found 313.0677.  $[\alpha]_{\text{D}}^{29}$ : -114.8 (c 1.0,  $\text{CHCl}_3$ ); HPLC analysis: 99% *ee* (Chiralcel AD-H, 10:90



<sup>i</sup>PrOH/Hexanes, 1 mL/min), R<sub>t</sub> (major) = 6.2 min, R<sub>t</sub> (minor) = 6.8 min. IR (KBr thin film, cm<sup>-1</sup>): ν 3713, 2987, 2379, 1729, 1228, 1041, 696.

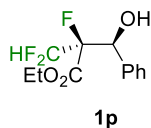

**ethyl (2*S*,3*S*)-2-(difluoromethyl)-2-fluoro-3-hydroxy-3-phenylpropanoate (1p):** Purified by flash chromatography on silica gel (petroleum ether/ethyl acetate, v:v = 10:1), colorless oil, 251 mg, 49% yield. <sup>1</sup>H NMR (400 MHz, CDCl<sub>3</sub>) δ 7.42–7.32 (m, 5H), 6.14 (ddd, *J* = 55.6, 52.2, 7.5 Hz, 1H), 5.25 (dd, *J* = 22.6, 2.8 Hz, 1H), 4.24–4.06 (m, 2H), 2.86 (s, 1H), 1.13 (t, *J* = 7.1 Hz, 3H); <sup>13</sup>C NMR (101 MHz, CDCl<sub>3</sub>) δ 164.3 (d, *J* = 27.1 Hz), 135.9, 129.4, 128.7, 127.8 (d, *J* = 1.4 Hz), 126.1 (d, *J* = 128.6 Hz), 112.8 (td, *J* = 250.0, 34.3 Hz), 95.9 (dt, *J* = 210.0, 21.9 Hz, 1F), 73.8 (d, *J* = 19.3 Hz), 62.7, 13.9; <sup>19</sup>F NMR (376 MHz, CDCl<sub>3</sub>) δδ -130.0 (ddd, *J* = 294.0, 52.1, 5.3 Hz), -134.7 (ddd, *J* = 294.0, 55.6, 12.7 Hz, 1F), -190.9 – -191.9 (m, 1F). HRMS (ESI-Quadrupole-Orbitrap) *m/z*: [M + Na]<sup>+</sup> Calcd for C<sub>12</sub>H<sub>13</sub>O<sub>3</sub>F<sub>3</sub>Na 285.0709; Found 285.0706. [α]<sub>D</sub><sup>29</sup>: -750.2 (c 1.0, CHCl<sub>3</sub>); HPLC analysis: 99% *ee* (Chiralcel AD-H, 10:90 <sup>i</sup>PrOH/Hexanes, 1 mL/min), R<sub>t</sub> (major) = 11.4 min, R<sub>t</sub> (minor) = 12.5 min. IR (KBr thin film, cm<sup>-1</sup>): ν 3498, 2983, 1757, 1294, 1107, 1028, 730, 703.

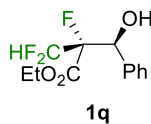

**ethyl (2*S*,3*R*)-2-(difluoromethyl)-2-fluoro-3-hydroxy-3-phenylpropanoate (1q):** Purified by flash chromatography on silica gel (petroleum ether/ethyl acetate, v:v = 10:1), colorless oil, 253 mg 49% yield. <sup>1</sup>H NMR (400 MHz, CDCl<sub>3</sub>) δ 7.43–7.36 (m, 5H), 5.94 (ddd, *J* = 52.8, 52.8, 9.6 Hz, 1H), 5.18 (d, *J* = 17.4 Hz, 1H), 4.25 (q, *J* = 7.2 Hz, 2H), 2.87 (s, 1H), 1.21 (t, *J* = 7.2 Hz, 3H); <sup>13</sup>C NMR (101 MHz, CDCl<sub>3</sub>) δ 164.3 (d, *J* = 27.1 Hz), 136.0, 129.4, 128.7, 127.7 (d, *J* = 1.4 Hz), 126.1 (d, *J* = 128.6 Hz), 112.8 (td, *J* = 250.0, 34.3 Hz), 95.9 (dt, *J* = 203.0, 21.9 Hz), 73.8 (d, *J* = 19.3 Hz), 62.7, 13.9; <sup>19</sup>F NMR (376 MHz, CDCl<sub>3</sub>) δ -132.4 (ddd, *J* = 292.6, 52.8, 10.4 Hz, 1F), -134.7 (ddd, *J* = 292.6, 52.8, 13.4 Hz, 1F), -189.8 – -191.2 (m, 1F). HRMS (ESI-Quadrupole-Orbitrap) *m/z*: [M + Na]<sup>+</sup> Calcd for C<sub>12</sub>H<sub>13</sub>O<sub>3</sub>F<sub>3</sub>Na 285.0709; Found 285.0706. [α]<sub>D</sub><sup>29</sup>: -268.4 (c 1.0, CHCl<sub>3</sub>); HPLC analysis: 90% *ee* (Chiralcel AD-H, 10:90 <sup>i</sup>PrOH/Hexanes, 1 mL/min), R<sub>t</sub> (major) = 11.9 min, R<sub>t</sub> (minor) = 13.3 min. IR (KBr thin film, cm<sup>-1</sup>): ν 3498, 2983, 1757, 1294, 1107, 1028, 730, 703.

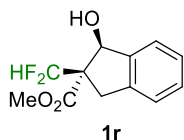



**methyl (1*R*,2*S*)-2-(difluoromethyl)-1-hydroxy-2,3-dihydro-1*H*-indene-2-carboxylate (1*r*):** Purified by flash chromatography on silica gel (petroleum ether/ethyl acetate, v:v = 10:1), colorless oil, 231 mg, 48% yield. <sup>1</sup>H NMR (400 MHz, CDCl<sub>3</sub>) δ 7.36 (d, *J* = 7.1 Hz, 1H), 7.32–7.22 (m, 3H), 6.38 (dd, *J* = 55.1, 55.1 Hz, 1H), 5.56 (d, *J* = 6.3 Hz, 1H), 3.80 (s, 3H), 3.53 (d, *J* = 17.0 Hz, 1H), 3.43 (d, *J* = 17.0 Hz, 1H), 2.58 (d, *J* = 6.5 Hz, 1H); <sup>13</sup>C NMR (101 MHz, CDCl<sub>3</sub>) δ 171.7 (dd, *J* = 8.2, 2.1 Hz), 141.1, 139.8, 129.4, 127.6, 124.6, 124.2, 116.3 (t, *J* = 244.7 Hz), 80.6 (dd, *J* = 4.4, 1.9 Hz), 61.4 (t, *J* = 19.2 Hz), 53.1, 33.1 (t, *J* = 3.8 Hz); <sup>19</sup>F NMR (376 MHz, CDCl<sub>3</sub>) δ -125.6 (dd, *J* = 285.9, 55.1 Hz, 1F), -127.4 (dd, *J* = 285.8, 55.1 Hz, 1F). HRMS (ESI-Quadrupole-Orbitrap) *m/z*: [M + Na]<sup>+</sup> Calcd for C<sub>12</sub>H<sub>12</sub>O<sub>3</sub>F<sub>2</sub>Na 265.0647; Found 265.0645. [α]<sub>D</sub><sup>29</sup>: -197.3 (c 1.0, CHCl<sub>3</sub>); HPLC analysis: 99% *ee* (Chiralcel AD-H, 10:90 *i*PrOH/Hexanes, 1 mL/min), R<sub>t</sub> (major) = 6.8 min, R<sub>t</sub> (minor) = 8.1 min. IR (KBr thin film, cm<sup>-1</sup>): ν 3654, 3301, 2320, 1729, 1543, 1263, 1059, 755.

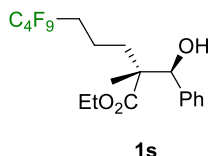

**ethyl (S)-6,6,7,7,8,8,9,9,9-nonafluoro-2-((*R*)-hydroxy(phenyl)methyl)-2-methylnonanoate (1*s*):** Purified by flash chromatography on silica gel (petroleum ether/ethyl acetate, v:v = 10:1), colorless oil, 445 mg, 48% yield. <sup>1</sup>H NMR (400 MHz, CDCl<sub>3</sub>) δ 7.75 (d, *J* = 7.3 Hz, 1H), 7.32–7.22 (m, 3H), 7.11 (d, *J* = 7.2 Hz, 1H), 4.49 (d, *J* = 11.7 Hz, 1H), 4.12–4.00 (m, 2H), 3.71 (d, *J* = 11.7 Hz, 1H), 3.54–3.44 (m, 1H), 2.72 (ddd, *J* = 23.2, 14.3, 6.8 Hz, 2H), 2.27–2.09 (m, 1H), 1.64–1.55 (m, 2H), 1.51 (s, 3H), 1.12 (t, *J* = 7.1 Hz, 3H); <sup>13</sup>C NMR (101 MHz, CDCl<sub>3</sub>) δ 176.4, 140.5, 136.4, 127.8, 127.2, 127.1, 126.4, 118.7, 75.5, 61.0, 47.3, 40.1 (d, *J* = 2.7 Hz), 39.3, 29.9 (d, *J* = 2.8 Hz), 23.9, 14.0; <sup>19</sup>F NMR (376 MHz, CDCl<sub>3</sub>) δ -81.0 (t, *J* = 10.3 Hz, 3F), -110.5 (dd, *J* = 272.2, 43.0 Hz, 1F), -114.5 (dd, *J* = 271.0, 42.5 Hz, 1F), -124.0 – -124.5 (m, 2F), -125.4 – -125.9 (m, 2F). HRMS (ESI-Quadrupole-Orbitrap) *m/z*: [M + Na]<sup>+</sup> Calcd for C<sub>19</sub>H<sub>21</sub>F<sub>9</sub>O<sub>3</sub>Na 491.3596; Found 492.3598. [α]<sub>D</sub><sup>29</sup>: -148.4 (c 1.0, CHCl<sub>3</sub>); HPLC analysis: 95% *ee* (Chiralcel AD-H, 10:90 *i*PrOH/Hexanes, 1 mL/min), R<sub>t</sub> (major) = 8.2 min, R<sub>t</sub> (minor) = 10.8 min. IR (KBr thin film, cm<sup>-1</sup>): ν 3675, 3301, 2320, 1736, 1567, 1263, 1017, 765.

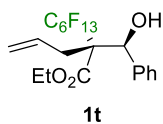

**ethyl (S)-2-allyl-3,3,4,4,5,5,6,6,7,7,8,8,8-tridecafluoro-2-((*R*)-hydroxy(phenyl)methyl)octanoate (1*t*):** Purified by flash chromatography on silica gel (petroleum ether/ethyl acetate, v:v = 10:1), colorless oil, 528 mg, 48% yield. <sup>1</sup>H NMR (600 MHz, CDCl<sub>3</sub>) δ 7.40–7.28 (m, 5H), 5.83–5.74 (m, 1H), 5.20–5.12 (m, 2H), 4.92 (dd, *J* = 19.1, 0.6 Hz, 1H), 4.13–4.01 (m, 2H), 2.92–2.65 (m, 3H), 1.10 (t, *J* = 6.8 Hz, 3H); <sup>13</sup>C NMR (151 MHz,

CDCl<sub>3</sub>)  $\delta$  169.5 (d,  $J$  = 24.4 Hz), 137.8, 130.6, 129.0 (d,  $J$  = 4.3 Hz), 128.7 (d,  $J$  = 9.0 Hz), 128.3 (d,  $J$  = 3.9 Hz), 128.0, 127.7 (d,  $J$  = 12.8 Hz), 127.4 (d,  $J$  = 11.5 Hz), 121.0–118.9 (m), 98.6 (d,  $J$  = 196.8 Hz), 76.4 (d,  $J$  = 23.8 Hz), 76.1 (d,  $J$  = 17.8 Hz), 61.7, 38.3, 14.1; <sup>19</sup>F NMR (376 MHz, CDCl<sub>3</sub>)  $\delta$  -58.5 – -61.5 (m, 2F), -80.1 – -83.4 (m, 3F), -112.6 – -115.0 (m, 2F), -120.6 – -122.6 (m, 2F), -122.8 – -124.6 (m, 2F), -125.6 – -128.0 (m, 2F). HRMS (ESI-Quadrupole-Orbitrap)  $m/z$ : [M + Na]<sup>+</sup> Calcd for C<sub>20</sub>H<sub>17</sub>O<sub>3</sub>F<sub>13</sub>Na 575.0862; Found 575.0859. [ $\alpha$ ]<sub>D</sub><sup>29</sup>: -125.2 (c 1.0, CHCl<sub>3</sub>); HPLC analysis: 99% *ee* (Chiralcel AD-H, 10:90 <sup>i</sup>PrOH/Hexanes, 1 mL/min), R<sub>t</sub> (major) = 15.8 min, R<sub>t</sub> (minor) = 18.4 min. IR (KBr thin film, cm<sup>-1</sup>):  $\nu$  2977, 2341, 1746, 1449, 1266, 1024, 855, 696.

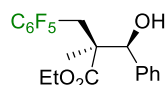

1u

**ethyl (2R,3S)-3-hydroxy-2-methyl-2-((perfluorophenyl)methyl)-3-phenylpropanoate (1u):**

Purified by flash chromatography on silica gel (petroleum ether/ethyl acetate, v:v = 10:1), white solid, mp 89–91 °C, 372 mg, 49% yield. <sup>1</sup>H NMR (400 MHz, CDCl<sub>3</sub>)  $\delta$  7.39–7.28 (m, 5H), 4.93 (d,  $J$  = 6.7 Hz, 1H), 4.24–4.09 (m, 2H), 3.48 (d,  $J$  = 6.9 Hz, 1H), 3.37 (d,  $J$  = 13.9 Hz, 1H), 2.75 (d,  $J$  = 13.8 Hz, 1H), 1.22 (t,  $J$  = 7.1 Hz, 3H), 0.99 (s, 3H); <sup>13</sup>C NMR (101 MHz, CDCl<sub>3</sub>)  $\delta$  175.2, 145.6 (d,  $J$  = 246.5 Hz), 140.1 (d,  $J$  = 253.4 Hz), 139.9, 138.3 (t,  $J$  = 16.4 Hz), 136.6 (t,  $J$  = 13.4 Hz), 128.2 (d,  $J$  = 12.9 Hz), 127.9, 111.1 (t,  $J$  = 18.7 Hz), 79.6, 61.7, 51.8, 30.2, 15.8, 13.9; <sup>19</sup>F NMR (376 MHz, CDCl<sub>3</sub>)  $\delta$  -140.1 (dd,  $J$  = 24.5, 9.2 Hz, 2F), -154.9 – -156.6 (m, 1F), -160.9 – -163.2 (m, 2F). HRMS (ESI-Quadrupole-Orbitrap)  $m/z$ : [M + Na]<sup>+</sup> Calcd for C<sub>19</sub>H<sub>17</sub>O<sub>3</sub>F<sub>5</sub>Na 411.0990; Found 411.0988. [ $\alpha$ ]<sub>D</sub><sup>29</sup>: -309.8 (c 1.0, CHCl<sub>3</sub>); HPLC analysis: 95% *ee* (Chiralcel AD-H, 10:90 <sup>i</sup>PrOH/Hexanes, 1 mL/min), R<sub>t</sub> (major) = 18.4 min, R<sub>t</sub> (minor) = 11.9 min. IR (KBr thin film, cm<sup>-1</sup>):  $\nu$  3509, 2925, 1729, 1525, 1501, 1214, 1100, 990, 699.

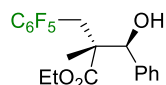

1v

**ethyl (2S,3S)-3-hydroxy-2-methyl-2-((perfluorophenyl)methyl)-3-phenylpropanoate (1v):**

Purified by flash chromatography on silica gel (petroleum ether/ethyl acetate, v:v = 10:1), colorless oil, 370 mg, 49% yield. <sup>1</sup>H NMR (400 MHz, CDCl<sub>3</sub>)  $\delta$  7.41–7.26 (m, 5H), 5.09 (s, 1H), 4.06 (q,  $J$  = 7.2 Hz, 2H), 3.39 (d,  $J$  = 12.9 Hz, 2H), 3.12 (d,  $J$  = 14.0 Hz, 1H), 1.17 (t,  $J$  = 7.2 Hz, 3H), 1.01 (s, 3H); <sup>13</sup>C NMR (101 MHz, CDCl<sub>3</sub>)  $\delta$  175.2, 147.2–146.9 (m), 144.7–144.5 (m), 141.5–141.1 (m), 139.6, 138.9–138.4 (m), 136.3–135.9 (m), 128.2, 128.0 (d,  $J$  = 12.6 Hz), 111.7 (t,  $J$  = 15.7 Hz), 77.4, 61.5, 52.0, 27.6, 16.1, 13.8; <sup>19</sup>F NMR (376 MHz, CDCl<sub>3</sub>)  $\delta$  -140.2 (dd,  $J$  = 23.1, 8.6 Hz, 2F), -155.8 – -156.8 (m, 1F), -162.1 – -163.9 (m, 2F). HRMS (ESI-Quadrupole-Orbitrap)  $m/z$ : [M + Na]<sup>+</sup> Calcd for C<sub>19</sub>H<sub>17</sub>O<sub>3</sub>F<sub>5</sub>Na 411.0990; Found 411.0981. [ $\alpha$ ]<sub>D</sub><sup>29</sup>: -215.1 (c 1.0, CHCl<sub>3</sub>); HPLC analysis: 99% *ee* (Chiralcel AD-H, 10:90 <sup>i</sup>PrOH/Hexanes, 1 mL/min), R<sub>t</sub>

(major) = 9.5 min,  $R_t$  (minor) = 10.7 min. IR (KBr thin film,  $\text{cm}^{-1}$ ):  $\nu$  3509, 2925, 1729, 1525, 1501, 1214, 1100, 990, 699.

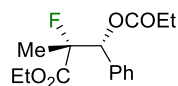

**2a**

**ethyl (2*S*,3*S*)-2-fluoro-2-methyl-3-phenyl-3-(propionyloxy)propanoate (2a):** Purified by flash chromatography on silica gel (petroleum ether/ethyl acetate, v:v = 10:1), yellow oil, 279 mg, 49% yield.  $^1\text{H}$  NMR (400 MHz,  $\text{CDCl}_3$ )  $\delta$  7.39–7.34 (m, 2H), 7.34–7.30 (m, 3H), 6.10 (d,  $J = 22.1$  Hz, 1H), 4.20–4.05 (m, 2H), 2.52–2.37 (m, 2H), 1.62 (d,  $J = 21.4$  Hz, 3H), 1.20–1.12 (m, 6H);  $^{13}\text{C}$  NMR (101 MHz,  $\text{CDCl}_3$ )  $\delta$  173.2, 169.6 (d,  $J = 24.1$  Hz), 134.9, 128.9, 128.3, 128.3 (d,  $J = 1.8$  Hz), 95.5 (d,  $J = 195.4$  Hz), 76.2 (d,  $J = 20.7$  Hz), 62.1, 27.7, 20.5 (d,  $J = 24.2$  Hz), 14.1, 9.2;  $^{19}\text{F}$  NMR (376 MHz,  $\text{CDCl}_3$ )  $\delta$  -166.7 (qd,  $J = 21.6, 21.5$  Hz, 3F). HRMS (ESI-Quadrupole-Orbitrap)  $m/z$ :  $[\text{M} + \text{Na}]^+$  Calcd for  $\text{C}_{15}\text{H}_{19}\text{O}_4\text{FNa}$  305.1160; Found 305.1163.  $[\alpha]_D^{29}$ :  $-495.1$  (c 1.0,  $\text{CHCl}_3$ ); HPLC analysis: 96% *ee* (Chiralcel AD-H, 10:90 *i*PrOH/Hexanes, 1 mL/min),  $R_t$  (major) = 4.7 min,  $R_t$  (minor) = 5.8 min. IR (KBr thin film,  $\text{cm}^{-1}$ ):  $\nu$  3637, 2928, 2845, 2368, 2334, 1657, 1553, 1266, 1017, 751, 668.

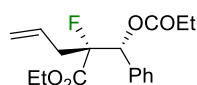

**2b**

**ethyl (*S*)-2-fluoro-2-((*S*)-phenyl(propionyloxy)methyl)pent-4-enoate (2b):** Purified by flash chromatography on silica gel (petroleum ether/ethyl acetate, v:v = 10:1), colorless oil, 298 mg, 49% yield.  $^1\text{H}$  NMR (400 MHz,  $\text{CDCl}_3$ )  $\delta$  7.40–7.34 (m, 2H), 7.34–7.28 (m, 3H), 6.11 (d,  $J = 24.0$  Hz, 1H), 5.86–5.71 (m, 1H), 5.20–5.10 (m, 2H), 4.15–4.00 (m, 2H), 2.84–2.59 (m, 2H), 2.54–2.37 (m, 2H), 1.16 (t,  $J = 7.3$  Hz, 3H), 1.13 (t,  $J = 7.3$  Hz, 3H);  $^{13}\text{C}$  NMR (101 MHz,  $\text{CDCl}_3$ )  $\delta$  173.1, 168.2 (d,  $J = 24.4$  Hz), 134.4, 130.2 (d,  $J = 3.9$  Hz), 129.0, 128.4, 128.4, 120.2, 97.8 (d,  $J = 200.7$  Hz), 75.9 (d,  $J = 18.9$  Hz), 61.8, 38.9 (d,  $J = 22.3$  Hz), 27.7, 14.2, 9.1;  $^{19}\text{F}$  NMR (376 MHz,  $\text{CDCl}_3$ )  $\delta$  -176.0 (qd,  $J = 34.2, 24.0, 10.9$  Hz, 3F). HRMS (ESI-Quadrupole-Orbitrap)  $m/z$ :  $[\text{M} + \text{Na}]^+$  Calcd for  $\text{C}_{17}\text{H}_{21}\text{O}_4\text{FNa}$  331.1316; Found 331.1314.  $[\alpha]_D^{29}$ :  $-281.2$  (c 1.0,  $\text{CHCl}_3$ ); HPLC analysis: 96% *ee* (Chiralcel AD-H, 10:90 *i*PrOH/Hexanes, 1 mL/min),  $R_t$  (major) = 4.5 min,  $R_t$  (minor) = 5.4 min. IR (KBr thin film,  $\text{cm}^{-1}$ ):  $\nu$  3671, 3298, 2987, 2945, 2355, 1750, 1543, 1166, 1024, 737, 699.

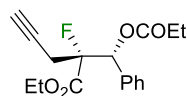

**2c**

**ethyl (S)-2-fluoro-2-((S)-phenyl(propionyloxy)methyl)pent-4-ynoate (2c):** Purified by flash chromatography on silica gel (petroleum ether/ethyl acetate, v:v = 10:1), yellow oil, 290 mg, 46% yield.  $^1\text{H NMR}$  (400 MHz,  $\text{CDCl}_3$ )  $\delta$  7.39–7.35 (m, 2H), 7.34–7.31 (m, 3H), 6.15 (d,  $J = 22.5$  Hz, 1H), 4.29–4.02 (m, 2H), 3.04–2.81 (m, 2H), 2.50–2.34 (m, 2H), 2.09 (t,  $J = 2.6$  Hz, 1H), 1.17 (t,  $J = 7.2$  Hz, 3H), 1.16 (t,  $J = 7.2$  Hz, 3H);  $^{13}\text{C NMR}$  (101 MHz,  $\text{CDCl}_3$ )  $\delta$  172.9, 167.5 (d,  $J = 24.4$  Hz), 134.3, 129.2, 128.6, 128.5, 128.3 (d,  $J = 1.7$  Hz), 96.1 (d,  $J = 203.9$  Hz), 76.6 (d,  $J = 4.9$  Hz), 75.5 (d,  $J = 19.4$  Hz), 72.2, 62.4, 27.7, 25.3 (d,  $J = 25.3$  Hz), 14.1, 9.1;  $^{19}\text{F NMR}$  (376 MHz,  $\text{CDCl}_3$ )  $\delta$  -173.3 (ddd,  $J = 27.3, 22.9, 13.0$  Hz, 1F). HRMS (ESI-Quadrupole-Orbitrap)  $m/z$ :  $[\text{M} + \text{Na}]^+$  Calcd for  $\text{C}_{17}\text{H}_{19}\text{O}_4\text{FNa}$  329.1160; Found 329.1156.  $[\alpha]_{\text{D}}^{29}$ : +96.5 (c 1.0,  $\text{CHCl}_3$ ); HPLC analysis: 99% *ee* (Chiralcel AD-H, 10:90  $i$ PrOH/Hexanes, 1 mL/min),  $R_t$  (major) = 9.5 min,  $R_t$  (minor) = 11.4 min. IR (KBr thin film,  $\text{cm}^{-1}$ ):  $\nu$  3675, 3294, 2987, 2939, 2348, 1743, 1546, 1169, 1090, 1031, 748, 696.

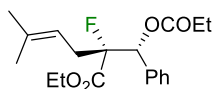

2d

**ethyl (S)-2-fluoro-5-methyl-2-((S)-phenyl(propionyloxy)methyl)hex-4-enoate (2d):** Purified by flash chromatography on silica gel (petroleum ether/ethyl acetate, v:v = 10:1), yellow oil, 330 mg, 49% yield.  $^1\text{H NMR}$  (400 MHz,  $\text{CDCl}_3$ )  $\delta$  7.42–7.35 (m, 2H), 7.33–7.27 (m, 3H), 6.11 (d,  $J = 24.0$  Hz, 1H), 5.19–5.09 (m, 1H), 4.06 (q,  $J = 7.1$  Hz, 2H), 2.74–2.65 (m, 2H), 2.52–2.37 (m, 2H), 1.60 (s, 3H), 1.57 (s, 3H), 1.16 (t,  $J = 7.4$  Hz, 3H), 1.12 (t,  $J = 7.4$  Hz, 3H);  $^{13}\text{C NMR}$  (151 MHz,  $\text{CDCl}_3$ )  $\delta$  173.2, 168.6 (d,  $J = 24.6$  Hz), 136.9, 135.0, 129.0, 128.4, 128.3, 115.5, 97.9 (d,  $J = 200.4$  Hz), 76.2 (d,  $J = 18.8$  Hz), 61.8, 33.4 (d,  $J = 22.5$  Hz), 27.8, 26.0, 18.1, 14.1, 9.2;  $^{19}\text{F NMR}$  (376 MHz,  $\text{CDCl}_3$ )  $\delta$  -175.8 – -176.2 (m, 1F). HRMS (ESI-Quadrupole-Orbitrap)  $m/z$ :  $[\text{M} + \text{H}]^+$  Calcd for  $\text{C}_{19}\text{H}_{26}\text{O}_4\text{F}$  337.1810; Found 337.1805.  $[\alpha]_{\text{D}}^{29}$ : -345.9 (c 1.0,  $\text{CHCl}_3$ ); HPLC analysis: 90% *ee* (Chiralcel AD-H, 10:90  $i$ PrOH/Hexanes, 1 mL/min),  $R_t$  (major) = 6.4 min,  $R_t$  (minor) = 4.7 min. IR (KBr thin film,  $\text{cm}^{-1}$ ):  $\nu$  3654, 2987, 2928, 2368, 1760, 1456, 1162, 1076, 1024, 768, 696.

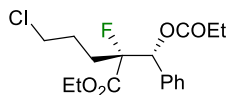

2e

**ethyl (S)-5-chloro-2-fluoro-2-((S)-phenyl(propionyloxy)methyl)pentanoate (2e):** Purified by flash chromatography on silica gel (petroleum ether/ethyl acetate, v:v = 10:1), colorless oil, 312 mg, 47% yield.  $^1\text{H NMR}$  (400 MHz,  $\text{CDCl}_3$ )  $\delta$  7.45–7.28 (m, 5H), 6.08 (d,  $J = 23.6$  Hz, 1H), 4.11 (dd,  $J = 9.8, 7.4$  Hz, 2H), 3.68–3.46 (m, 2H), 2.56–2.34 (m, 2H), 2.23–2.07 (m, 1H), 2.09–1.93 (m, 1H), 1.71 (dd,  $J = 12.9, 6.8$  Hz, 1H), 1.65–1.54 (m, 1H), 1.23–1.06 (m, 6H);  $^{13}\text{C NMR}$  (101 MHz,  $\text{CDCl}_3$ )  $\delta$  173.1, 168.5 (d,  $J = 24.8$  Hz), 134.7, 129.1, 128.4, 97.9 (d,  $J = 199.7$  Hz), 76.2 (d,  $J = 19.2$  Hz), 62.1, 44.4, 31.6 (d,  $J = 22.6$  Hz), 27.7, 26.6 (d,  $J = 3.1$  Hz), 14.1, 9.1;  $^{19}\text{F}$

NMR (376 MHz, CDCl<sub>3</sub>)  $\delta$  -176.3 (dd,  $J$  = 43.2, 23.7 Hz, 1F). HRMS (ESI-Quadrupole-Orbitrap)  $m/z$ : [M + Na]<sup>+</sup> Calcd for C<sub>17</sub>H<sub>22</sub>O<sub>4</sub>ClFNa 367.1083; Found 367.1080; [ $\alpha$ ]<sub>D</sub><sup>29</sup>: -345.9 (c 1.0, CHCl<sub>3</sub>). HPLC analysis: 95% *ee* (Chiralcel AD-H, 10:90 <sup>i</sup>PrOH/Hexanes, 1 mL/min), R<sub>t</sub> (major) = 4.1 min, R<sub>t</sub> (minor) = 3.6 min. IR (KBr thin film, cm<sup>-1</sup>):  $\nu$  3664, 3298, 2987, 2932, 2856, 2368, 1750, 1560, 1259, 1166, 1017, 758, 696.

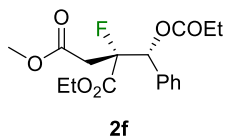

**1-ethyl 4-methyl (S)-2-fluoro-2-((S)-phenyl(propionyloxy)methyl)succinate (2f):** Purified by flash chromatography on silica gel (petroleum ether/ethyl acetate, v:v = 10:1), colorless oil, 338 mg, 50% yield. <sup>1</sup>H NMR (600 MHz, CDCl<sub>3</sub>)  $\delta$  7.37–7.30 (m, 5H), 6.03 (d,  $J$  = 21.5 Hz, 1H), 4.18–4.07 (m, 2H), 3.68 (s, 3H), 3.16 (dd,  $J$  = 36.5, 16.5 Hz, 1H), 2.99 (dd,  $J$  = 16.5, 8.2 Hz, 1H), 2.54–2.37 (m, 2H), 1.16 (t,  $J$  = 7.3 Hz, 3H), 1.12 (t,  $J$  = 7.3 Hz, 3H); <sup>13</sup>C NMR (151 MHz, CDCl<sub>3</sub>)  $\delta$  172.9, 168.7, 168.2 (d,  $J$  = 23.3 Hz), 134.0, 129.3, 128.5, 128.3, 94.9 (d,  $J$  = 203.3 Hz), 75.8 (d,  $J$  = 20.1 Hz), 62.3, 52.3, 39.1 (d,  $J$  = 24.1 Hz), 27.7, 13.9, 9.1; <sup>19</sup>F NMR (376 MHz, CDCl<sub>3</sub>)  $\delta$  -173.9 (ddd,  $J$  = 37.0, 21.6, 8.8 Hz, 1F). HRMS (ESI-Quadrupole-Orbitrap)  $m/z$ : [M + Na]<sup>+</sup> Calcd for C<sub>17</sub>H<sub>21</sub>O<sub>6</sub>FNa 363.1214; Found 363.1210. [ $\alpha$ ]<sub>D</sub><sup>29</sup>: +91.7 (c 1.0, CHCl<sub>3</sub>); HPLC analysis: 96% *ee* (Chiralcel AD-H, 10:90 <sup>i</sup>PrOH/Hexanes, 1 mL/min), R<sub>t</sub> (major) = 8.4 min, R<sub>t</sub> (minor) = 11.1 min. IR (KBr thin film, cm<sup>-1</sup>):  $\nu$  3681, 2987, 2939, 2852, 2351, 1746, 1449, 1173, 1010, 703.

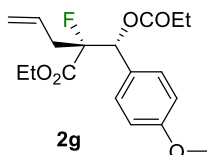

**ethyl (S)-2-fluoro-2-((S)-(4-methoxyphenyl)(propionyloxy)methyl)pent-4-enoate (2g):** Purified by flash chromatography on silica gel (petroleum ether/ethyl acetate, v:v = 10:1), colorless oil, 344 mg, 50% yield. <sup>1</sup>H NMR (400 MHz, CDCl<sub>3</sub>)  $\delta$  7.36 (d,  $J$  = 7.8 Hz, 2H), 6.88 (d,  $J$  = 8.7 Hz, 2H), 6.00 (d,  $J$  = 25.5 Hz, 1H), 5.73–5.60 (m, 1H), 5.13–5.02 (m, 2H), 4.25 (qd,  $J$  = 7.1, 2.5 Hz, 2H), 3.79 (s, 3H), 2.49 (ddd,  $J$  = 34.2, 14.5, 8.4 Hz, 1H), 2.37–2.18 (m, 3H), 1.28 (t,  $J$  = 7.1 Hz, 3H), 1.07 (t,  $J$  = 7.6 Hz, 3H); <sup>13</sup>C NMR (101 MHz, CDCl<sub>3</sub>)  $\delta$  172.7, 168.8 (d,  $J$  = 27.0 Hz), 160.2, 130.2 (d,  $J$  = 2.1 Hz), 129.7 (d,  $J$  = 3.8 Hz), 126.4, 120.2, 113.9, 97.6 (d,  $J$  = 198.9 Hz), 76.7 (d,  $J$  = 17.3 Hz), 61.9, 55.3, 38.9 (d,  $J$  = 21.5 Hz), 27.6, 14.4, 9.1; <sup>19</sup>F NMR (376 MHz, CDCl<sub>3</sub>)  $\delta$  -178.8 (ddd,  $J$  = 34.9, 25.5, 10.4 Hz, 1F). HRMS (ESI-Quadrupole-Orbitrap)  $m/z$ : [M + Na]<sup>+</sup> Calcd for C<sub>18</sub>H<sub>23</sub>O<sub>5</sub>FNa 361.1422; Found 361.1419. [ $\alpha$ ]<sub>D</sub><sup>29</sup>: -333.8 (c 1.0, CHCl<sub>3</sub>); HPLC analysis: 96% *ee* (Chiralcel AD-H, 10:90 <sup>i</sup>PrOH/Hexanes, 1 mL/min), R<sub>t</sub> (major) = 4.0 min, R<sub>t</sub> (minor) = 3.5 min. IR (KBr thin film, cm<sup>-1</sup>):  $\nu$  3681, 3315, 2987, 2945, 2838, 2313, 1753, 1605, 1511, 1256, 1176, 1031, 907, 748.

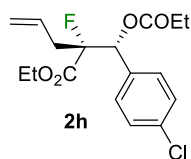

**ethyl (S)-2-((S)-(4-chlorophenyl)(propionyloxy)methyl)-2-fluoropent-4-enoate (2h):** Purified by flash chromatography on silica gel (petroleum ether/ethyl acetate, v:v = 10:1), colorless oil, 325 mg, 49% yield.  $^1\text{H}$  NMR (400 MHz,  $\text{CDCl}_3$ )  $\delta$  7.42–7.32 (m, 4H), 5.97 (d,  $J = 24.9$  Hz, 1H), 5.71–5.60 (m, 1H), 5.15–5.03 (m, 2H), 4.32–4.20 (m, 2H), 2.60–2.41 (m, 1H), 2.38–2.28 (m, 2H), 2.27–2.18 (m, 1H), 1.29 (t,  $J = 7.1$  Hz, 3H), 1.08 (t,  $J = 7.6$  Hz, 3H);  $^{13}\text{C}$  NMR (101 MHz,  $\text{CDCl}_3$ )  $\delta$  172.6, 168.5 (d,  $J = 26.8$  Hz), 135.2, 132.8, 130.3 (d,  $J = 3.1$  Hz), 129.4 (d,  $J = 3.8$  Hz), 128.8, 120.5, 97.2 (d,  $J = 199.5$  Hz), 76.4 (d,  $J = 18.4$  Hz), 62.1, 38.8 (d,  $J = 21.5$  Hz), 27.5, 14.4, 9.1;  $^{19}\text{F}$  NMR (376 MHz,  $\text{CDCl}_3$ )  $\delta$  -178.4 (ddd,  $J = 34.6, 24.9, 10.6$  Hz, 1F). HRMS (ESI-Quadrupole-Orbitrap)  $m/z$ :  $[\text{M} + \text{Na}]^+$  Calcd for  $\text{C}_{17}\text{H}_{20}\text{O}_4\text{ClFNa}$  365.0926; Found 365.0924.  $[\alpha]_{\text{D}}^{29}$ : -363.1 (c 1.0,  $\text{CHCl}_3$ ); HPLC analysis: 91% *ee* (Chiralcel AD-H, 10:90  $i$ PrOH/Hexanes, 1 mL/min),  $R_t$  (major) = 3.0 min,  $R_t$  (minor) = 2.7 min. IR (KBr thin film,  $\text{cm}^{-1}$ ):  $\nu$  3685, 3319, 2997, 2317, 1760, 1587, 1491, 1166, 1014, 914, 751.

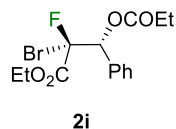

**ethyl (2R,3S)-2-bromo-2-fluoro-3-phenyl-3-(propionyloxy)propanoate (2i):** Purified by flash chromatography on silica gel (petroleum ether/ethyl acetate, v:v = 10:1), colorless oil. 320 mg, 48% yield.  $^1\text{H}$  NMR (400 MHz,  $\text{CDCl}_3$ )  $\delta$  7.55–7.50 (m, 2H), 7.43–7.36 (m, 3H), 6.33 (d,  $J = 23.8$  Hz, 1H), 4.44–4.28 (m, 2H), 2.34 (q,  $J = 7.6$  Hz, 2H), 1.35 (t,  $J = 7.1$  Hz, 3H), 1.10 (t,  $J = 7.6$  Hz, 3H);  $^{13}\text{C}$  NMR (101 MHz,  $\text{CDCl}_3$ )  $\delta$  171.8, 164.8 (d,  $J = 28.3$  Hz), 132.5, 129.7 (d,  $J = 1.9$  Hz), 129.6 (d,  $J = 1.8$  Hz), 128.3, 96.1 (d,  $J = 273.9$  Hz), 77.6 (d,  $J = 18.8$  Hz), 63.5, 27.5, 14.0, 9.0;  $^{19}\text{F}$  NMR (376 MHz,  $\text{CDCl}_3$ )  $\delta$  -134.5 (d,  $J = 23.8$  Hz, 1F). HRMS (ESI-Quadrupole-Orbitrap)  $m/z$ :  $[\text{M} + \text{Na}]^+$  Calcd for  $\text{C}_{14}\text{H}_{16}\text{O}_4\text{FBrNa}$  369.0108; Found 369.0109.  $[\alpha]_{\text{D}}^{29}$ : -249.4 (c 1.0,  $\text{CHCl}_3$ ); HPLC analysis: 93% *ee* (Chiralcel AD-H, 10:90  $i$ PrOH/Hexanes, 1 mL/min),  $R_t$  (major) = 12.6 min,  $R_t$  (minor) = 11.5 min. IR (KBr thin film,  $\text{cm}^{-1}$ ):  $\nu$  3685, 3319, 2997, 2317, 1760, 1587, 1491, 1166, 1014, 914, 751.

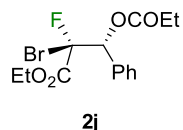

**ethyl (2R,3R)-2-bromo-2-fluoro-3-phenyl-3-(propionyloxy)propanoate (2j):** Purified by flash chromatography on silica gel (petroleum ether/ethyl acetate, v:v = 10:1), colorless oil, 320 mg, 48% yield.  $^1\text{H}$  NMR (400 MHz,  $\text{CDCl}_3$ )  $\delta$  7.47–7.39 (m, 2H), 7.37–7.31 (m, 3H), 6.42 (d,  $J =$

23.2 Hz, 1H), 4.21 (qd,  $J = 7.1, 2.4$  Hz, 2H), 2.63–2.40 (m, 2H), 1.22 (t,  $J = 7.3$  Hz, 3H), 1.20 (t,  $J = 7.3$  Hz, 3H);  $^{13}\text{C}$  NMR (101 MHz,  $\text{CDCl}_3$ )  $\delta$  172.7, 164.2 (d,  $J = 25.9$  Hz), 132.6, 129.7, 128.9 (d,  $J = 1.8$  Hz), 128.7, 96.9 (d,  $J = 275.0$  Hz), 76.8 (d,  $J = 17.1$  Hz), 63.5, 27.7, 13.8, 9.1;  $^{19}\text{F}$  NMR (376 MHz,  $\text{CDCl}_3$ )  $\delta$  -130.6 (d,  $J = 23.2$  Hz, 1F). HRMS (ESI-Quadrupole-Orbitrap)  $m/z$ :  $[\text{M} + \text{Na}]^+$  Calcd for  $\text{C}_{14}\text{H}_{16}\text{O}_4\text{FBrNa}$  369.0108; Found 369.0109.  $[\alpha]_{\text{D}}^{29}$ : -1252.0 (c 1.0,  $\text{CHCl}_3$ ); HPLC analysis: 99% *ee* (Chiralcel AD-H, 10:90 *i*PrOH/Hexanes, 1 mL/min),  $R_t$  (major) = 6.6 min,  $R_t$  (minor) = 7.8 min. IR (KBr thin film,  $\text{cm}^{-1}$ ):  $\nu$  3668, 3315, 2980, 2320, 1760, 1598, 1276, 1162, 1031, 744, 692.

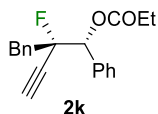

**(1S,2R)-2-benzyl-2-fluoro-1-phenylbut-3-yn-1-yl propionate (2k):** Purified by flash chromatography on silica gel (petroleum ether/ethyl acetate, v:v = 10:1), colorless oil, 302 mg, 49% yield.  $^1\text{H}$  NMR (600 MHz,  $\text{CDCl}_3$ )  $\delta$  7.53–7.47 (m, 2H), 7.41–7.33 (m, 3H), 7.32–7.22 (m, 5H), 5.96 (d,  $J = 16.1$  Hz, 1H), 3.20 (dd,  $J = 14.1, 11.8$  Hz, 1H), 2.98 (dd,  $J = 29.5, 14.1$  Hz, 1H), 2.65 (d,  $J = 5.1$  Hz, 1H), 2.58–2.41 (m, 2H), 1.19 (t,  $J = 7.6$  Hz, 3H);  $^{13}\text{C}$  NMR (151 MHz,  $\text{CDCl}_3$ )  $\delta$  173.0, 135.1, 134.1, 130.8, 129.0, 128.7, 128.2 (d,  $J = 2.4$  Hz), 127.3, 92.7 (d,  $J = 183.3$  Hz), 79.7 (d,  $J = 8.9$  Hz), 78.9 (d,  $J = 28.8$  Hz), 77.4 (d,  $J = 23.7$  Hz), 42.6 (d,  $J = 23.6$  Hz), 27.9, 9.2;  $^{19}\text{F}$  NMR (376 MHz,  $\text{CDCl}_3$ )  $\delta$  -151.2 – -151.6 (m, 1F). HRMS (ESI-Quadrupole-Orbitrap)  $m/z$ :  $[\text{M} + \text{Na}]^+$  Calcd. for  $\text{C}_{20}\text{H}_{19}\text{O}_2\text{FNa}$  333.1261; Found 333.1258.  $[\alpha]_{\text{D}}^{29}$ : -512 (c 1.0,  $\text{CHCl}_3$ ); HPLC analysis: 95% *ee* (Chiralcel AD-H, 10:90 *i*PrOH/Hexanes, 1 mL/min),  $R_t$  (major) = 3.7 min,  $R_t$  (minor) = 4.2 min. IR (KBr thin film,  $\text{cm}^{-1}$ ):  $\nu$  3671, 3294, 3153, 2313, 1753, 1549, 1456, 1266, 1173, 755, 692.

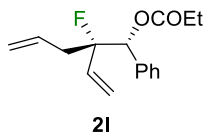

**(1S,2R)-2-fluoro-1-phenyl-2-vinylpent-4-en-1-yl propionate (2l):** Purified by flash chromatography on silica gel (petroleum ether/ethyl acetate, v:v = 10:1), yellow oil, 256 mg, 51% yield.  $^1\text{H}$  NMR (600 MHz,  $\text{CDCl}_3$ )  $\delta$  7.34–7.31 (m, 2H), 7.31–7.27 (m, 3H), 5.82 (d,  $J = 16.8$  Hz, 1H), 5.77–5.61 (m, 2H), 5.27 (dd,  $J = 17.3, 1.2$  Hz, 1H), 5.22 (dt,  $J = 11.1, 1.3$  Hz, 1H), 5.07 (dd,  $J = 10.0, 0.8$  Hz, 1H), 5.00 (dd,  $J = 17.0, 1.4$  Hz, 1H), 2.47 (td,  $J = 14.3, 6.9$  Hz, 1H), 2.43–2.27 (m, 3H), 1.10 (t,  $J = 7.6$  Hz, 3H);  $^{13}\text{C}$  NMR (151 MHz,  $\text{CDCl}_3$ )  $\delta$  173.1, 135.7 (d,  $J = 6.5$  Hz), 135.6, 131.4 (d,  $J = 4.5$  Hz), 128.6, 128.2, 119.2, 116.8 (d,  $J = 11.5$  Hz), 97.3 (d,  $J = 186.1$  Hz), 40.0 (d,  $J = 22.3$  Hz), 27.8, 9.2;  $^{19}\text{F}$  NMR (376 MHz,  $\text{CDCl}_3$ )  $\delta$  -168.8 – -169.2 (m, 1F). HRMS (ESI-Quadrupole-Orbitrap)  $m/z$ :  $[\text{M} + \text{Na}]^+$  Calcd. for  $\text{C}_{16}\text{H}_{19}\text{O}_2\text{FNa}$  285.1261; Found 285.1265.  $[\alpha]_{\text{D}}^{29}$ : -725.0 (c 1.0,  $\text{CHCl}_3$ ); HPLC analysis: 99% *ee* (Chiralcel AD-H, 10:90 *i*PrOH/Hexanes, 1



mL/min),  $R_t$  (major) = 5.5 min,  $R_t$  (minor) = 7.6 min. IR (KBr thin film,  $\text{cm}^{-1}$ ):  $\nu$  3650, 3326, 3160, 2365, 1708, 1556, 1411, 1266, 1010, 748.

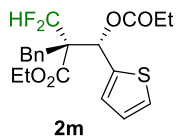

**ethyl (2S,3R)-2-benzyl-2-(difluoromethyl)-3-(propionyloxy)-3-(thiophen-2-yl)propanoate (2m):** Purified by flash chromatography on silica gel (petroleum ether/ethyl acetate, v:v = 10:1), yellow oil, 390 mg, 49% yield.  $^1\text{H}$  NMR (600 MHz,  $\text{CDCl}_3$ )  $\delta$  7.31 (dd,  $J$  = 5.0, 1.1 Hz, 1H), 7.26–7.20 (m, 5H), 7.11–7.08 (m, 1H), 6.99 (dd,  $J$  = 5.0, 3.6 Hz, 1H), 6.56 (s, 1H), 5.99 (t,  $J$  = 53.7 Hz, 1H), 4.26–4.14 (m, 2H), 3.33 (d,  $J$  = 13.9 Hz, 1H), 3.23 (d,  $J$  = 13.9 Hz, 1H), 2.35 (q,  $J$  = 7.6 Hz, 2H), 1.25 (t,  $J$  = 7.1 Hz, 3H), 1.13 (t,  $J$  = 7.6 Hz, 3H);  $^{13}\text{C}$  NMR (151 MHz,  $\text{CDCl}_3$ )  $\delta$  172.4, 168.8, 138.4, 134.9, 130.7, 128.4, 127.7, 127.3, 126.6, 126.2, 116.4 (dd,  $J$  = 248.1, 248.1 Hz), 72.0, 61.9, 59.0 (t,  $J$  = 18.9 Hz), 35.7, 27.8, 14.1, 9.1;  $^{19}\text{F}$  NMR (376 MHz,  $\text{CDCl}_3$ )  $\delta$  -124.9 (dd,  $J$  = 283.8, 53.7 Hz, 1F), -127.7 (dd,  $J$  = 284.0, 54.0 Hz, 1F). HRMS (ESI-Quadrupole-Orbitrap)  $m/z$ :  $[\text{M} + \text{Na}]^+$  Calcd. for  $\text{C}_{20}\text{H}_{22}\text{O}_4\text{F}_2\text{SNa}$  419.1099; Found 419.1096.  $[\alpha]_{\text{D}}^{29}$ : -237.0 (c 1.0,  $\text{CHCl}_3$ ); HPLC analysis: 99% *ee* (Chiralcel AD-H, 10:90 *i*PrOH/Hexanes, 1 mL/min),  $R_t$  (major) = 5.8 min,  $R_t$  (minor) = 5.2 min. IR (KBr thin film,  $\text{cm}^{-1}$ ):  $\nu$  3650, 3315, 3101, 2382, 1736, 1539, 1453, 1380, 1263, 1038, 755.

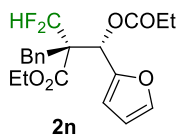

**ethyl (2S,3R)-2-benzyl-2-(difluoromethyl)-3-(furan-2-yl)-3-(propionyloxy)propanoate (2n):** Purified by flash chromatography on silica gel (petroleum ether/ethyl acetate, v:v = 10:1), yellow oil, 320 mg, 43% yield.  $^1\text{H}$  NMR (400 MHz,  $\text{CDCl}_3$ )  $\delta$  7.42 (d,  $J$  = 4.3 Hz, 1H), 7.29–7.19 (m, 3H), 7.19–7.12 (m, 2H), 6.47–6.31 (m, 3H), 6.03 (dd,  $J$  = 54.0, 54.0 Hz, 1H), 4.22 (q,  $J$  = 7.1 Hz, 2H), 3.08 (s, 2H), 2.35 (dt,  $J$  = 7.5, 5.9 Hz, 2H), 1.25 (t,  $J$  = 7.1 Hz, 3H), 1.13 (t,  $J$  = 7.6 Hz, 3H);  $^{13}\text{C}$  NMR (101 MHz,  $\text{CDCl}_3$ )  $\delta$  172.5, 168.7 (d,  $J$  = 4.3 Hz), 149.7, 142.7, 134.8, 130.4, 128.5, 127.3, 116.0 (dd,  $J$  = 250.3, 245.8 Hz), 110.6, 110.4, 67.9, 61.7, 58.1 (t,  $J$  = 17.8 Hz), 36.0, 27.7, 14.1, 9.0;  $^{19}\text{F}$  NMR (376 MHz,  $\text{CDCl}_3$ )  $\delta$  -126.7 (dd,  $J$  = 279.4, 54.2 Hz, 1F), -128.2 (ddd,  $J$  = 279.1, 54.1, 1.3 Hz, 1F). HRMS (ESI-Quadrupole-Orbitrap)  $m/z$ :  $[\text{M} + \text{Na}]^+$  Calcd. for  $\text{C}_{20}\text{H}_{22}\text{O}_5\text{F}_2\text{Na}$  403.1328; Found 403.1324.  $[\alpha]_{\text{D}}^{29}$ : -372.0 (c 1.0,  $\text{CHCl}_3$ ); HPLC analysis: 94% *ee* (Chiralcel IA, 02:98 *i*PrOH/Hexanes, 1 mL/min),  $R_t$  (major) = 16.9 min,  $R_t$  (minor) = 20.0 min. IR (KBr thin film,  $\text{cm}^{-1}$ ):  $\nu$  3650, 3298, 3149, 2323, 1746, 1539, 1380, 1263, 1024, 758.



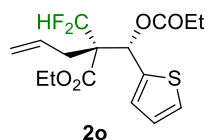

**ethyl (S)-2-(difluoromethyl)-2-((R)-(propionyloxy)(thiophen-2-yl)methyl)pent-4-enoate (2o):**

Purified by flash chromatography on silica gel (petroleum ether/ethyl acetate, v:v = 10:1), colorless oil, 349 mg, 51% yield. <sup>1</sup>H NMR (400 MHz, CDCl<sub>3</sub>) δ 7.32–7.24 (m, 1H), 7.07 (d, *J* = 3.4 Hz, 1H), 6.97 (dd, *J* = 5.0, 3.6 Hz, 1H), 6.52 (s, 1H), 6.13 (dd, *J* = 54.6, 54.6 Hz, 1H), 5.90–5.74 (m, 1H), 5.18–5.08 (m, 2H), 4.30–4.20 (m, 2H), 2.66–2.45 (m, 2H), 2.40–2.32 (m, 2H), 1.30 (t, *J* = 7.2 Hz, 3H), 1.13 (t, *J* = 7.6 Hz, 3H); <sup>13</sup>C NMR (101 MHz, CDCl<sub>3</sub>) δ 172.2, 168.5, 138.2, 131.9, 127.7, 126.5, 126.3, 119.4, 116.2 (t, *J* = 249.2 Hz), 70.7, 61.8, 57.5 (t, *J* = 18.7 Hz), 33.8, 27.6, 14.1, 8.9; <sup>19</sup>F NMR (376 MHz, CDCl<sub>3</sub>) δ -126.4 (dd, *J* = 284.7, 54.5 Hz, 1F), -128.8 (dd, *J* = 284.7, 54.5 Hz, 1F). HRMS (ESI-Quadrupole-Orbitrap) *m/z*: [M + Na]<sup>+</sup> Calcd. for C<sub>16</sub>H<sub>20</sub>O<sub>4</sub>F<sub>2</sub>SNa 369.0943; Found 369.0940. [α]<sub>D</sub><sup>29</sup>: -273.0 (c 1.0, CHCl<sub>3</sub>); HPLC analysis: 91% *ee* (Chiralcel IA, 02:98 <sup>i</sup>PrOH/Hexanes, 1 mL/min), R<sub>t</sub> (major) = 4.9 min, R<sub>t</sub> (minor) = 6.5 min. IR (KBr thin film, cm<sup>-1</sup>): ν 3661, 2962, 1748, 1451, 1236, 1088, 1022, 918, 707.

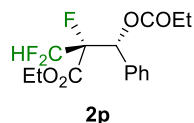

**ethyl (2S,3S)-2-(difluoromethyl)-2-fluoro-3-phenyl-3-(propionyloxy)propanoate (2p):**

Purified by flash chromatography on silica gel (petroleum ether/ethyl acetate, v:v = 10:1), colorless oil, 301 mg, 49% yield. <sup>1</sup>H NMR (400 MHz, CDCl<sub>3</sub>) δ 7.42–7.30 (m, 5H), 6.34 (d, *J* = 24.6 Hz, 1H), 6.09 (ddd, *J* = 52.5, 52.5, 8.4 Hz, 1H), 4.26–4.12 (m, 2H), 2.51–2.32 (m, 2H), 1.17 (t, *J* = 7.4 Hz, 3H), 1.15 (t, *J* = 7.4 Hz, 3H); <sup>13</sup>C NMR (101 MHz, CDCl<sub>3</sub>) δ 172.5, 163.6 (dd, *J* = 24.2, 4.1 Hz), 132.9, 129.7, 128.7, 128.4 (d, *J* = 1.5 Hz), 112.6 (td, *J* = 252.0, 33.0 Hz), 96.2 (d, *J* = 23.0 Hz), 73.6 (dt, *J* = 18.3, 3.4 Hz), 63.0, 27.6, 14.0, 8.9; <sup>19</sup>F NMR (376 MHz, CDCl<sub>3</sub>) δ -129.1 (ddd, *J* = 194.4, 52.4, 4.7 Hz, 1F), -133.5 (dd, *J* = 194.4, 52.4, 11.1 Hz, 1F), -189.8 – 190.0 (m, 1F). HRMS (ESI-Quadrupole-Orbitrap) *m/z*: [M + Na]<sup>+</sup> Calcd. for C<sub>15</sub>H<sub>17</sub>O<sub>4</sub>F<sub>3</sub>Na 341.0971; Found 341.0972. [α]<sub>D</sub><sup>29</sup>: -305.0 (c 1.0, CHCl<sub>3</sub>); HPLC analysis: 99% *ee* (Chiralcel IA, 02:98 <sup>i</sup>PrOH/Hexanes, 1 mL/min), R<sub>t</sub> (major) = 3.1 min, R<sub>t</sub> (minor) = 4.8 min. IR (KBr thin film, cm<sup>-1</sup>): ν 3685, 3319, 2990, 1760, 1567, 1266, 1169, 1093, 1024, 751, 696.

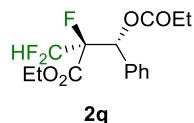

**ethyl (2S,3R)-2-(difluoromethyl)-2-fluoro-3-phenyl-3-(propionyloxy)propanoate (2q):**

Purified by flash chromatography on silica gel (petroleum ether/ethyl acetate, v:v = 10:1), colorless oil, 312 mg, 49% yield. <sup>1</sup>H NMR (400 MHz, CDCl<sub>3</sub>) δ 7.45–7.41 (m, 2H), 7.40–7.36

(m, 3H), 6.28 (dd,  $J = 24.0, 2.1$  Hz, 1H), 5.59 (ddd,  $J = 52.4, 52.4, 6.8$  Hz, 1H), 4.42–4.23 (m, 2H), 2.38 (q,  $J = 7.6$  Hz, 2H), 1.30 (t,  $J = 7.1$  Hz, 3H), 1.12 (t,  $J = 7.5$  Hz, 3H);  $^{13}\text{C}$  NMR (101 MHz,  $\text{CDCl}_3$ )  $\delta$  172.1, 164.0 (dd,  $J = 26.4, 3.8$  Hz), 133.0, 129.7, 128.9, 128.3 (d,  $J = 1.4$  Hz), 112.2 (ddd,  $J = 251.9, 249.9, 32.5$  Hz), 94.5 (dt,  $J = 203.2, 23.6$  Hz), 73.6 (ddd,  $J = 19.8, 5.2, 1.6$  Hz), 63.1, 27.5, 14.1, 9.0;  $^{19}\text{F}$  NMR (376 MHz,  $\text{CDCl}_3$ )  $\delta$  -129.1 (ddd,  $J = 297.8, 52.3, 9.8$  Hz, 1F), -134.6 (dd,  $J = 297.8, 52.3, 12.8$  Hz, 1F), -187.6 – -188.8 (m, 1F). HRMS (ESI-Quadrupole-Orbitrap)  $m/z$ :  $[\text{M} + \text{Na}]^+$  Calcd. for  $\text{C}_{15}\text{H}_{17}\text{O}_4\text{F}_3\text{Na}$  341.0971; Found 341.0970.  $[\alpha]_{\text{D}}^{29}$ : -118.0 (c 1.0,  $\text{CHCl}_3$ ); HPLC analysis: 91% *ee* (Chiralcel IA, 02:98 *i*PrOH/Hexanes, 1 mL/min),  $R_t$  (major) = 5.1 min,  $R_t$  (minor) = 6.2 min. IR (KBr thin film,  $\text{cm}^{-1}$ ):  $\nu$  3685, 3319, 2990, 1760, 1567, 1266, 1169, 1093, 1024, 751. 696.

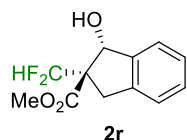

**methyl (1R,2S)-2-(difluoromethyl)-1-(propionyloxy)-2,3-dihydro-1H-indene-2-carboxylate (2r):** Purified by flash chromatography on silica gel (petroleum ether/ethyl acetate, v:v = 10:1), colorless oil, 289 mg, 49% yield.  $^1\text{H}$  NMR (400 MHz,  $\text{CDCl}_3$ )  $\delta$  7.34–7.21 (m, 4H), 6.70 (s, 1H), 6.26 (dd,  $J = 54.9, 54.9$  Hz, 1H), 3.79 (s, 3H), 3.60 (d,  $J = 16.7$  Hz, 1H), 3.46 (d,  $J = 16.7$  Hz, 1H), 2.42 (q,  $J = 7.6$  Hz, 2H), 1.19 (t,  $J = 7.5$  Hz, 3H);  $^{13}\text{C}$  NMR (101 MHz,  $\text{CDCl}_3$ )  $\delta$  173.8, 170.4 (d,  $J = 6.9$  Hz), 140.6, 138.4, 129.8, 127.6, 125.1, 124.6, 115.4 (dd,  $J = 248.8, 245.4$  Hz), 79.5, 60.6 (t,  $J = 20.2$  Hz), 53.3, 34.1, 27.7, 9.2;  $^{19}\text{F}$  NMR (376 MHz,  $\text{CDCl}_3$ )  $\delta$  -124.3 (dd,  $J = 285.7, 54.9$  Hz, 1F), -126.9 (dd,  $J = 285.6, 54.9$  Hz, 1F). HRMS (ESI-Quadrupole-Orbitrap)  $m/z$ :  $[\text{M} + \text{Na}]^+$  Calcd. for  $\text{C}_{15}\text{H}_{16}\text{O}_4\text{F}_2\text{Na}$  321.0909; Found 321.0912.  $[\alpha]_{\text{D}}^{29}$ : -1096.0 (c 1.0,  $\text{CHCl}_3$ ); HPLC analysis: 99% *ee* (Chiralcel IA, 02:98 *i*PrOH/Hexanes, 1 mL/min),  $R_t$  (major) = 6.2 min,  $R_t$  (minor) = 5.5 min. IR (KBr thin film,  $\text{cm}^{-1}$ ):  $\nu$  3668, 3291, 3118, 2317, 1746, 1539, 1259, 751.

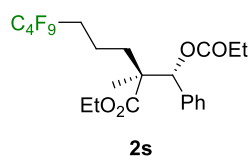

**ethyl (S)-6,6,7,7,8,8,9,9,9-nonafluoro-2-methyl-2-((R)-phenyl(propionyloxy)methyl)nonanoate (2s):** Purified by flash chromatography on silica gel (petroleum ether/ethyl acetate, v:v = 10:1), colorless oil, 514 mg, 49% yield.  $^1\text{H}$  NMR (400 MHz,  $\text{CDCl}_3$ )  $\delta$  7.37–7.30 (m, 2H), 7.30–7.16 (m, 3H), 6.10 (s, 1H), 4.12 (q,  $J = 7.1$  Hz, 2H), 3.62 (d,  $J = 7.0$  Hz, 1H), 2.83 (dd,  $J = 14.5, 7.4$  Hz, 1H), 2.76–2.57 (m, 1H), 2.49–2.26 (m, 3H), 1.83 (dd,  $J = 14.5, 6.2$  Hz, 1H), 1.62–1.58 (m, 1H), 1.24 (s, 3H), 1.18 (t,  $J = 7.2$  Hz, 3H), 1.12 (t,  $J = 7.5$  Hz, 3H);  $^{13}\text{C}$  NMR (100 MHz,  $\text{CDCl}_3$ )  $\delta$  173.1, 168.5 (d,  $J = 24.7$  Hz), 134.7, 129.1, 128.4 (d,  $J = 2.4$  Hz), 119.0–118.3 (m), 116.2–115.4 (m), 108.6–107.4 (m), 97.9 (d,  $J = 199.6$  Hz), 96.4, 93.6–92.7 (m), 90.5–89.5 (m), 76.2 (d,  $J = 19.0$  Hz), 62.1, 44.4, 31.6 (d,  $J = 22.6$  Hz), 27.7, 26.6, 14.1,

9.1;  $^{19}\text{F}$  NMR (376 MHz,  $\text{CDCl}_3$ )  $\delta$  -81.0 (t,  $J$  = 9.6 Hz, 3F), -111.8 (dd,  $J$  = 267.9, 36.6 Hz, 1F), -114.4 (dd,  $J$  = 267.1, 34.1 Hz, 1F), -124.2 – -124.5 (m, 2F), -125.7 – -125.9 (m). HRMS (ESI-Quadrupole-Orbitrap)  $m/z$ :  $[\text{M} + \text{Na}]^+$  Calcd. for  $\text{C}_{22}\text{H}_{25}\text{O}_4\text{F}_9\text{Na}$  547.4237; Found 547.4238.  $[\alpha]_{\text{D}}^{29}$ : -140.5 (c 1.0,  $\text{CHCl}_3$ ); HPLC analysis: 99% *ee* (Chiralcel IA, 02:98  $i$ PrOH/Hexanes, 1 mL/min),  $R_t$  (major) = 3.5 min,  $R_t$  (minor) = 3.0 min. IR (KBr thin film,  $\text{cm}^{-1}$ ):  $\nu$  3688, 3318, 3166, 2308, 1745, 1579, 1261, 1015, 752.

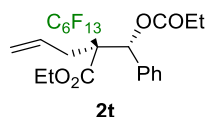

**ethyl (S)-2-allyl-3,3,4,4,5,5,6,6,7,7,8,8,8-tridecafluoro-2-((R)-phenyl(propionyloxy)methyl)octanoate (2t):** Purified by flash chromatography on silica gel (petroleum ether/ethyl acetate, v:v = 10:1), colorless oil, 595 mg, 49% yield.  $^1\text{H}$  NMR (600 MHz,  $\text{CDCl}_3$ )  $\delta$  7.39–7.35 (m, 2H), 7.33–7.30 (m, 3H), 6.11 (d,  $J$  = 23.9 Hz, 1H), 5.83–5.73 (m, 1H), 5.19–5.13 (m, 2H), 4.14–3.98 (m, 2H), 2.83–2.76 (m, 1H), 2.73–2.62 (m, 1H), 2.50–2.37 (m, 2H), 1.16 (t,  $J$  = 7.6 Hz, 3H), 1.13 (t,  $J$  = 7.2 Hz, 3H);  $^{13}\text{C}$  NMR (151 MHz,  $\text{CDCl}_3$ )  $\delta$  173.1, 168.2 (d,  $J$  = 24.7 Hz), 134.8, 130.2 (d,  $J$  = 3.2 Hz), 129.1, 128.5 (d,  $J$  = 8.4 Hz), 120.2, 118.2 (t,  $J$  = 33.1 Hz), 116.3 (t,  $J$  = 33.3 Hz), 110.0 (t,  $J$  = 31.4 Hz), 108.5–107.4 (m), 106.5 (t,  $J$  = 31.5 Hz), 97.8 (d,  $J$  = 200.6 Hz), 95.3 (t,  $J$  = 41.9 Hz), 93.2 (t,  $J$  = 41.6 Hz), 91.1 (t,  $J$  = 41.7 Hz), 76.0 (d,  $J$  = 18.9 Hz), 61.9, 39.1 (d,  $J$  = 36.4 Hz), 27.8, 14.2, 9.1;  $^{19}\text{F}$  NMR (376 MHz,  $\text{CDCl}_3$ )  $\delta$  -67.5 – -69.5 (m, 2F), -84.8 – -86.2 (m, 3F), -121.6 – -122.7 (m, 2F), -125.4 – -126.7 (m, 2F), -127.0 – -128.2 (m, 2F), -130.3 – -131.5 (m, 2F). HRMS (ESI-Quadrupole-Orbitrap)  $m/z$ :  $[\text{M} + \text{Na}]^+$  Calcd. for  $\text{C}_{23}\text{H}_{21}\text{F}_{13}\text{O}_4\text{Na}$  631.1124; Found 631.1120.  $[\alpha]_{\text{D}}^{29}$ : -150.8 (c 1.0,  $\text{CHCl}_3$ ); HPLC analysis: 96% *ee* (Chiralcel IA, 02:98  $i$ PrOH/Hexanes, 1 mL/min),  $R_t$  (major) = 6.6 min,  $R_t$  (minor) = 7.7 min. IR (KBr thin film,  $\text{cm}^{-1}$ ):  $\nu$  3674, 2986, 1755, 1458, 1257, 1160, 1074, 756, 696.

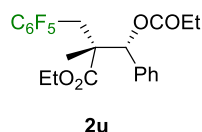

**ethyl (2R,3S)-2-methyl-2-((perfluorophenyl)methyl)-3-phenyl-(propionyloxy)propanoate (2u):** Purified by flash chromatography on silica gel (petroleum ether/ethyl acetate, v:v = 10:1), colorless oil, 422 mg, 49% yield.  $^1\text{H}$  NMR (400 MHz,  $\text{CDCl}_3$ )  $\delta$  7.42–7.32 (m, 5H), 6.25 (s, 1H), 4.28–4.19 (m, 1H), 4.14–4.05 (m, 1H), 3.19 (d,  $J$  = 13.6 Hz, 1H), 2.61 (d,  $J$  = 13.6 Hz, 1H), 2.33 (q,  $J$  = 7.6 Hz, 2H), 1.27 (t,  $J$  = 7.1 Hz, 3H), 1.11 (t,  $J$  = 7.5 Hz, 6H);  $^{13}\text{C}$  NMR (101 MHz,  $\text{CDCl}_3$ )  $\delta$  173.2, 172.7, 146.6–146.3 (m), 144.8–144.6 (m), 138.4–138.1 (m), 136.7–136.3 (m), 136.1, 128.8, 128.3 (d,  $J$  = 32.0 Hz), 110.1, 78.9, 61.6, 51.3, 29.1, 27.8, 15.0, 14.1, 9.2;  $^{19}\text{F}$  NMR (376 MHz,  $\text{CDCl}_3$ )  $\delta$  -140.2 (dd,  $J$  = 24.0, 9.2 Hz, 2F), -155.3 (t,  $J$  = 21.4 Hz, 1F), -160.7 – -163.1 (m, 2F). HRMS (ESI-Quadrupole-Orbitrap)  $m/z$ :  $[\text{M} + \text{Na}]^+$  Calcd. for  $\text{C}_{22}\text{H}_{21}\text{O}_4\text{F}_5\text{Na}$

467.1252; Found 467.1251.  $[\alpha]_D^{29}$ :  $-152.0$  (c 1.0,  $\text{CHCl}_3$ ); HPLC analysis: 94% *ee* (Chiralcel IA, 02:98 *i*PrOH/Hexanes, 1 mL/min),  $R_t$  (major) = 4.4 min,  $R_t$  (minor) = 4.1 min. IR (KBr thin film,  $\text{cm}^{-1}$ ):  $\nu$  3654, 3291, 2986, 1741, 1530, 1506, 1468, 1261, 1167, 1119, 1008, 967, 752, 693.

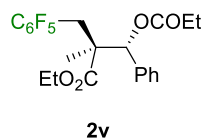

**ethyl (2*S*,3*S*)-2-methyl-2-((perfluorophenyl)methyl)-3-phenyl-3-(propionyloxy)propanoate**

**(2v):** Purified by flash chromatography on silica gel (petroleum ether/ethyl acetate, v:v = 10:1), colorless oil, 421 mg, 49% yield.  $^1\text{H}$  NMR (400 MHz,  $\text{CDCl}_3$ )  $\delta$  7.26–7.15 (m, 5H), 6.15 (s, 1H), 3.99 (q,  $J = 7.1$  Hz, 2H), 3.25 (d,  $J = 13.9$  Hz, 1H), 3.00 (d,  $J = 13.9$  Hz, 1H), 2.44–2.31 (m, 2H), 1.18 (t,  $J = 7.2$  Hz, 3H), 1.13 (t,  $J = 7.6$  Hz, 3H), 1.07 (s, 3H);  $^{13}\text{C}$  NMR (101 MHz,  $\text{CDCl}_3$ )  $\delta$  173.1, 172.6, 146.7–146.5 (m), 145.1–144.8 (m), 138.4–138.2 (m), 136.9, 136.8–136.5 (m), 128.5, 128.0 (d,  $J = 40.5$  Hz), 110.9 (t,  $J = 15.6$  Hz), 77.6, 61.6, 52.1, 29.7 (d,  $J = 40.5$  Hz), 28.0, 15.2, 13.9, 9.2;  $^{19}\text{F}$  NMR (376 MHz,  $\text{CDCl}_3$ )  $\delta$  -140.2 (dd,  $J = 23.2, 8.7$  Hz, 2F), -155.5 (t,  $J = 21.4$  Hz, 1F), -161.0 – -163.7 (m, 2F). HRMS (ESI-Quadrupole-Orbitrap)  $m/z$ :  $[\text{M} + \text{Na}]^+$  Calcd. for  $\text{C}_{22}\text{H}_{21}\text{O}_4\text{F}_5\text{Na}$  467.1252; Found 467.1248.  $[\alpha]_D^{29}$ :  $-309.7$  (c 1.0,  $\text{CHCl}_3$ ); HPLC analysis: 98% *ee* (Chiralcel IA, 02:98 *i*PrOH/Hexanes, 1 mL/min),  $R_t$  (major) = 7.1 min,  $R_t$  (minor) = 3.5 min. IR (KBr thin film,  $\text{cm}^{-1}$ ):  $\nu$  3654, 3291, 2986, 1741, 1530, 1506, 1468, 1261, 1167, 1119, 1008, 967, 752, 693.

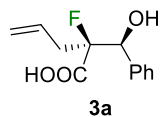

**(*S*)-2-fluoro-2-((*S*)-hydroxy(phenyl)methyl)pent-4-enoic acid (3a):** Purified by flash chromatography on silica gel (petroleum ether/ethyl acetate, v:v = 1:1), white solid, mp 80–82 °C, 45 mg, 99% yield.  $^1\text{H}$  NMR (400 MHz,  $\text{CDCl}_3$ )  $\delta$  7.42–7.30 (m, 5H), 5.92–5.60 (m, 3H), 5.13 (s, 1H), 5.09 (d,  $J = 7.2$  Hz, 1H), 5.01 (d,  $J = 23.5$  Hz, 1H), 2.56 (ddd,  $J = 35.8, 14.6, 8.0$  Hz, 1H), 2.30–2.04 (m, 1H);  $^{13}\text{C}$  NMR (101 MHz,  $\text{CDCl}_3$ )  $\delta$  175.1 (d,  $J = 27.2$  Hz), 137.3, 129.9 (d,  $J = 2.9$  Hz), 128.7, 128.5, 128.2, 120.3, 98.9 (d,  $J = 196.7$  Hz), 76.6 (d,  $J = 18.6$  Hz), 38.5 (d,  $J = 21.3$  Hz);  $^{19}\text{F}$  NMR (376 MHz,  $\text{CDCl}_3$ )  $\delta$  -180.7 – 181.3 (m, 1F). HRMS (ESI-Quadrupole-Orbitrap)  $m/z$ :  $[\text{M} + \text{Na}]^+$  Calcd. for  $\text{C}_{12}\text{H}_{13}\text{O}_3\text{FNa}$  247.0741; Found 247.0740.  $[\alpha]_D^{29}$ :  $+146.2$  (c 1.0,  $\text{CHCl}_3$ ); HPLC analysis: 90% *ee* (Chiralcel AD-H, 10:90 *i*PrOH/Hexanes, 1 mL/min),  $R_t$  (major) = 18.2 min,  $R_t$  (minor) = 19.4 min. IR (KBr thin film,  $\text{cm}^{-1}$ ):  $\nu$  3692, 2921, 2351, 2351, 1739, 1460, 1017, 696, 606.

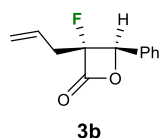

**(3R,4S)-3-allyl-3-fluoro-4-phenyloxetan-2-one (3b):** Purified by flash chromatography on silica gel (petroleum ether/ethyl acetate, v:v = 5:1), white solid, 125 mg, 33% yield. <sup>1</sup>H NMR (600 MHz, CDCl<sub>3</sub>) δ 7.46–7.34 (m, 2H), 7.35–7.26 (m, 3H), 5.83–5.71 (m, 1H), 5.25–5.15 (m, 2H), 5.11 (d, *J* = 25.2 Hz, 1H), 3.15–3.03 (m, 1H), 2.71 (ddd, *J* = 33.3, 14.4, 8.5 Hz, 1H); <sup>13</sup>C NMR (151 MHz, CDCl<sub>3</sub>) δ 172.2 (d, *J* = 26.6 Hz), 135.6 (d, *J* = 8.1 Hz), 129.5 (d, *J* = 4.3 Hz), 129.4, 128.9, 128.6, 121.4–121.1 (m), 98.1 (d, *J* = 201.7 Hz), 64.4–63.7 (m), 40.6–40.2 (m); <sup>19</sup>F NMR (376 MHz, CDCl<sub>3</sub>) δ -160.1 – -164.5 (m, 1F). HRMS (ESI-Quadrupole-Orbitrap) *m/z*: [M + Na]<sup>+</sup> Calcd. for C<sub>12</sub>H<sub>11</sub>O<sub>2</sub>FNa 229.2163; Found 229.2168. [α]<sub>D</sub><sup>29</sup>: -222.8 (c 1.0, CHCl<sub>3</sub>); HPLC analysis: 99% *ee* (Chiralcel AD-H, 10:90 <sup>i</sup>PrOH/Hexanes, 1 mL/min), R<sub>t</sub> (major) = 23.1 min, R<sub>t</sub> (minor) = 26.0 min. IR (KBr thin film, cm<sup>-1</sup>): ν 3692, 3315, 3111, 2319, 1727, 1458, 1274, 756.

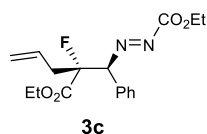

**ethyl (Z)-2-((1S,2S)-2-(ethoxycarbonyl)-2-fluoro-1-phenylpent-4-en-1-yl)diazene-1-carboxylate (3c):** Purified by flash chromatography on silica gel (petroleum ether/ethyl acetate, v:v = 3:1), colorless oil, 32.1 mg, 47% yield. <sup>1</sup>H NMR (400 MHz, CDCl<sub>3</sub>) δ 7.48–7.42 (m, 2H), 7.42–7.35 (m, 3H), 5.86 (d, *J* = 24.3 Hz, 1H), 5.75–5.59 (m, 1H), 5.15–5.04 (m, 2H), 4.37–4.23 (m, 2H), 4.20–4.05 (m, 2H), 2.52 (ddd, *J* = 33.5, 14.4, 8.4 Hz, 1H), 2.31–2.16 (m, 1H), 1.30 (t, *J* = 7.1 Hz, 3H), 1.24 (t, *J* = 7.1 Hz, 3H); <sup>13</sup>C NMR (101 MHz, CDCl<sub>3</sub>) δ 168.7 (d, *J* = 26.5 Hz), 154.0, 133.7, 129.5 (d, *J* = 3.9 Hz), 129.4, 128.9 (d, *J* = 1.9 Hz), 128.6, 120.5, 97.2 (d, *J* = 200.9 Hz), 80.6 (d, *J* = 18.5 Hz), 77.4, 64.6, 62.1 38.8 (d, *J* = 21.4 Hz), 14.3 (d, *J* = 7.4 Hz); <sup>19</sup>F NMR (376 MHz, CDCl<sub>3</sub>) δ -178.8 (ddd, *J* = 33.7, 21.1, 12.7 Hz, 1F). HRMS (ESI-Quadrupole-Orbitrap) *m/z*: [M + Na]<sup>+</sup> Calcd. for C<sub>17</sub>H<sub>21</sub>O<sub>4</sub>FN<sub>2</sub>Na 337.1378; Found 337.1370. [α]<sub>D</sub><sup>29</sup>: +146.2 (c 1.0, CHCl<sub>3</sub>); HPLC analysis: 99% *ee* (Chiralcel AD-H, 10:90 <sup>i</sup>PrOH/Hexanes, 1 mL/min), R<sub>t</sub> (major) = 3.4 min, R<sub>t</sub> (minor) = 4.1 min. IR (KBr thin film, cm<sup>-1</sup>): ν 3678, 3311, 3145, 2160, 1759, 1458, 1261, 749.

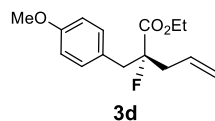

**ethyl (S)-2-fluoro-2-(4-methoxybenzyl)pent-4-enoate (3d):** Purified by flash chromatography on silica gel (petroleum ether/ethyl acetate, v:v = 3:1), colorless oil, 108 mg, 81% yield. <sup>1</sup>H NMR (600 MHz, CDCl<sub>3</sub>) δ 7.13 (d, *J* = 8.3 Hz, 2H), 6.83–6.80 (m, 2H), 5.85–5.77 (m, 1H), 5.18–5.13 (m, 2H), 4.19–4.08 (m, 2H), 3.78 (s, 3H), 3.09 (ddd, *J* = 30.2, 24.4, 14.6 Hz, 2H), 2.74–2.51 (m, 2H); <sup>13</sup>C NMR (151 MHz, CDCl<sub>3</sub>) δ 170.7 (d, *J* = 24.9 Hz), 158.8, 131.4, 130.9 (d, *J* = 3.0 Hz), 126.6, 119.8, 113.4, 97.2 (d, *J* = 191.9 Hz), 61.6, 55.3, 42.2 (d, *J* = 21.5 Hz), 41.5 (d, *J* = 21.5 Hz), 14.2; <sup>19</sup>F NMR (376 MHz, CDCl<sub>3</sub>) δ -164.3 – -164.6 (m, 1F). HRMS (ESI-Quadrupole-Orbitrap) *m/z*: [M + Na]<sup>+</sup> Calcd. for C<sub>15</sub>H<sub>19</sub>O<sub>3</sub>FNa 289.1210; Found 289.1208. [α]<sub>D</sub><sup>29</sup>: +146.2 (c 1.0, CHCl<sub>3</sub>); HPLC analysis: 96% *ee* (Chiralcel AD-H, 10:90 <sup>i</sup>PrOH/Hexanes,

1 mL/min),  $R_t$  (major) = 9.5 min,  $R_t$  (minor) = 8.0 min. IR (KBr thin film,  $\text{cm}^{-1}$ ):  $\nu$  3678, 3304, 2927, 2308, 1727, 1520, 1458, 1257, 1036, 756.

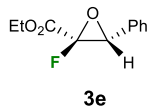

**ethyl (2*S*,3*S*)-2-fluoro-3-phenyloxirane-2-carboxylate (33)**: Purified by flash chromatography on silica gel (petroleum ether/ethyl acetate, v:v = 3:1), colorless oil, 7.5 mg, 55% yield.  $^1\text{H}$  NMR (600 MHz,  $\text{CDCl}_3$ )  $\delta$  7.38–7.34 (m, 5H), 4.49 (d,  $J$  = 1.9 Hz, 1H), 4.19–4.11 (m, 2H), 1.11 (t,  $J$  = 7.2 Hz, 3H);  $^{13}\text{C}$  NMR (151 MHz,  $\text{CDCl}_3$ )  $\delta$  161.8 (d,  $J$  = 39.6 Hz), 130.3 (d,  $J$  = 2.4 Hz), 129.2, 128.4, 126.6 (d,  $J$  = 278.7 Hz), 62.8, 13.8;  $^{19}\text{F}$  NMR (376 MHz,  $\text{CDCl}_3$ )  $\delta$  -139.6 (d,  $J$  = 1.7 Hz, 1F). HRMS (ESI-Quadrupole-Orbitrap)  $m/z$ :  $[\text{M} + \text{Na}]^+$  Calcd. for  $\text{C}_{11}\text{H}_{11}\text{O}_3\text{FNa}$  233.0584; Found 233.0585.  $[\alpha]_{\text{D}}^{29}$ : +146.2 (c 1.0,  $\text{CHCl}_3$ ); HPLC analysis: 99% *ee* (Chiralcel AD-H, 10:90 *i*PrOH/Hexanes, 1 mL/min),  $R_t$  (major) = 15.2 min,  $R_t$  (minor) = 18.1 min. IR (KBr thin film,  $\text{cm}^{-1}$ ):  $\nu$  3688, 3315, 3135, 2326, 1762, 1458, 1264, 763.

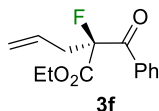

**ethyl (S)-2-benzoyl-2-fluoropent-4-enoate (3f)**: Purified by flash chromatography on silica gel (petroleum ether/ethyl acetate, v:v = 20:1), colorless oil, 21.3 mg, 86% yield.  $^1\text{H}$  NMR (400 MHz,  $\text{CDCl}_3$ )  $\delta$  8.04 (d,  $J$  = 7.8 Hz, 2H), 7.59 (t,  $J$  = 7.1 Hz, 1H), 7.46 (t,  $J$  = 7.8 Hz, 2H), 5.89–5.77 (m, 1H), 5.26–5.19 (m, 2H), 4.33–4.17 (m, 2H), 3.13–2.96 (m, 2H), 1.21 (t,  $J$  = 7.1 Hz, 3H).  $^{13}\text{C}$  NMR (101 MHz,  $\text{CDCl}_3$ )  $\delta$  191.6 (d,  $J$  = 25.6 Hz), 167.4 (d,  $J$  = 25.9 Hz), 134.0, 133.8 (d,  $J$  = 3.5 Hz), 129.9 (d,  $J$  = 5.6 Hz), 129.8 (d,  $J$  = 3.4 Hz), 128.7, 120.7, 100.0 (d,  $J$  = 200.1 Hz), 62.7, 39.0 (d,  $J$  = 21.4 Hz), 14.1.  $^{19}\text{F}$  NMR (376 MHz,  $\text{CDCl}_3$ )  $\delta$  -160.3 (dd,  $J$  = 28.9, 20.1 Hz).  $[\alpha]_{\text{D}}^{29}$ : -883.1 (c 1.0,  $\text{CHCl}_3$ ); HPLC analysis: 92% *ee* (Chiralcel OJ-H, 05:95 *i*PrOH/Hexanes, 1 mL/min),  $R_t$  (major) = 4.1 min,  $R_t$  (minor) = 4.8 min.

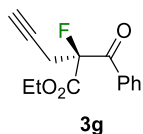

**ethyl (S)-2-benzoyl-2-fluoropent-4-ynoate (3g)**: Purified by flash chromatography on silica gel (petroleum ether/ethyl acetate, v:v = 20:1), colorless oil, 14.8 mg, 60% yield.  $^1\text{H}$  NMR (400 MHz,  $\text{CDCl}_3$ )  $\delta$  8.09 (d,  $J$  = 8.0 Hz, 2H), 7.61 (t,  $J$  = 7.4 Hz, 1H), 7.48 (t,  $J$  = 7.8 Hz, 2H), 4.37–4.21 (m, 2H), 3.33 (ddd,  $J$  = 28.7, 17.5, 2.7 Hz, 1H), 3.13 (td,  $J$  = 17.3, 2.6 Hz, 1H), 2.12 (t,  $J$  = 2.6 Hz, 1H), 1.24 (t,  $J$  = 7.1 Hz, 3H).  $^{13}\text{C}$  NMR (101 MHz,  $\text{CDCl}_3$ )  $\delta$  190.3 (d,  $J$  = 25.0 Hz), 166.3 (d,  $J$  = 25.8 Hz), 134.4, 133.4 (d,  $J$  = 3.3 Hz), 130.1 (d,  $J$  = 5.6 Hz), 128.8, 97.7 (d,  $J$  = 204.6 Hz), 76.4 (d,  $J$  = 2.2 Hz), 72.4, 63.2, 25.6 (d,  $J$  = 22.5 Hz), 14.1.  $^{19}\text{F}$  NMR (376 MHz,  $\text{CDCl}_3$ )  $\delta$  -158.9 (dd,  $J$  = 28.7, 17.1 Hz).  $[\alpha]_{\text{D}}^{29}$ : -529.4 (c 1.0,  $\text{CHCl}_3$ ); HPLC analysis: 99% *ee* (Chiralcel OJ-H, 05:95 *i*PrOH/Hexanes, 1 mL/min),  $R_t$  (major) = 6.8 min,  $R_t$  (minor) = 8.1 min.

## VII. $^1\text{H}$ NMR and $^{13}\text{C}$ NMR spectra of substrates and products.

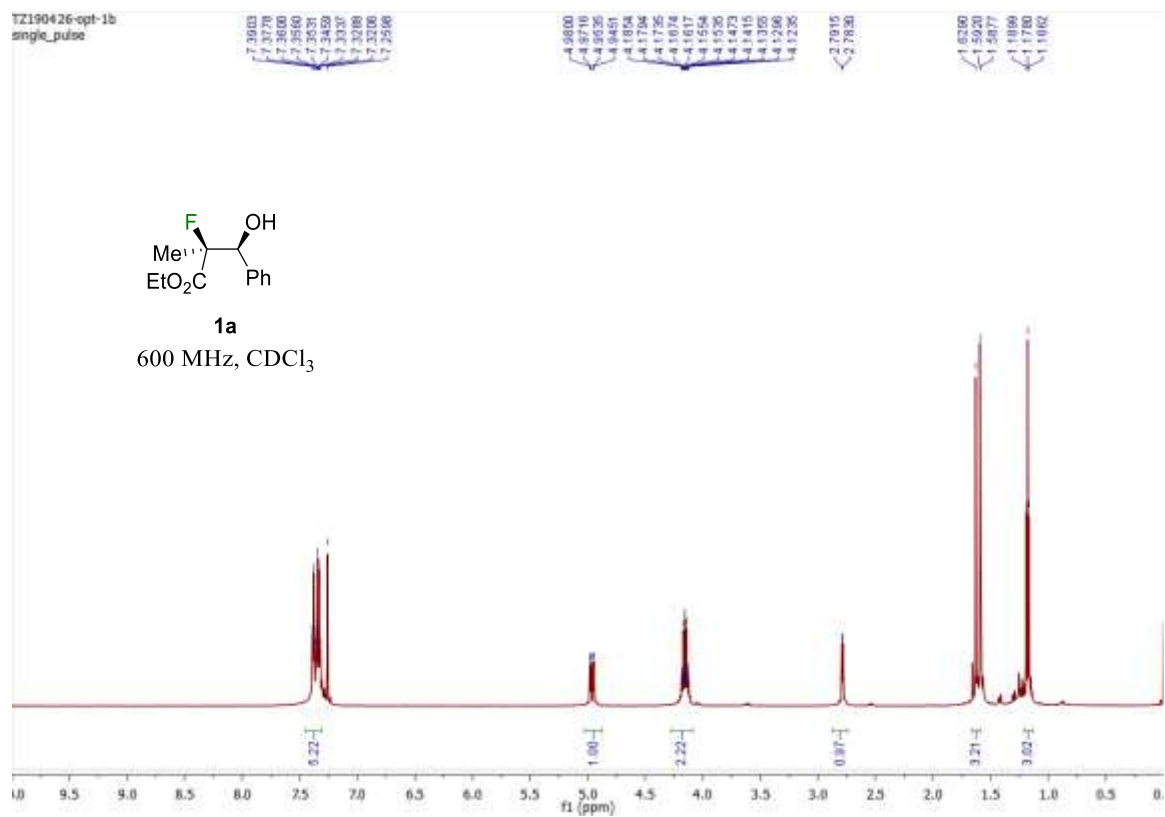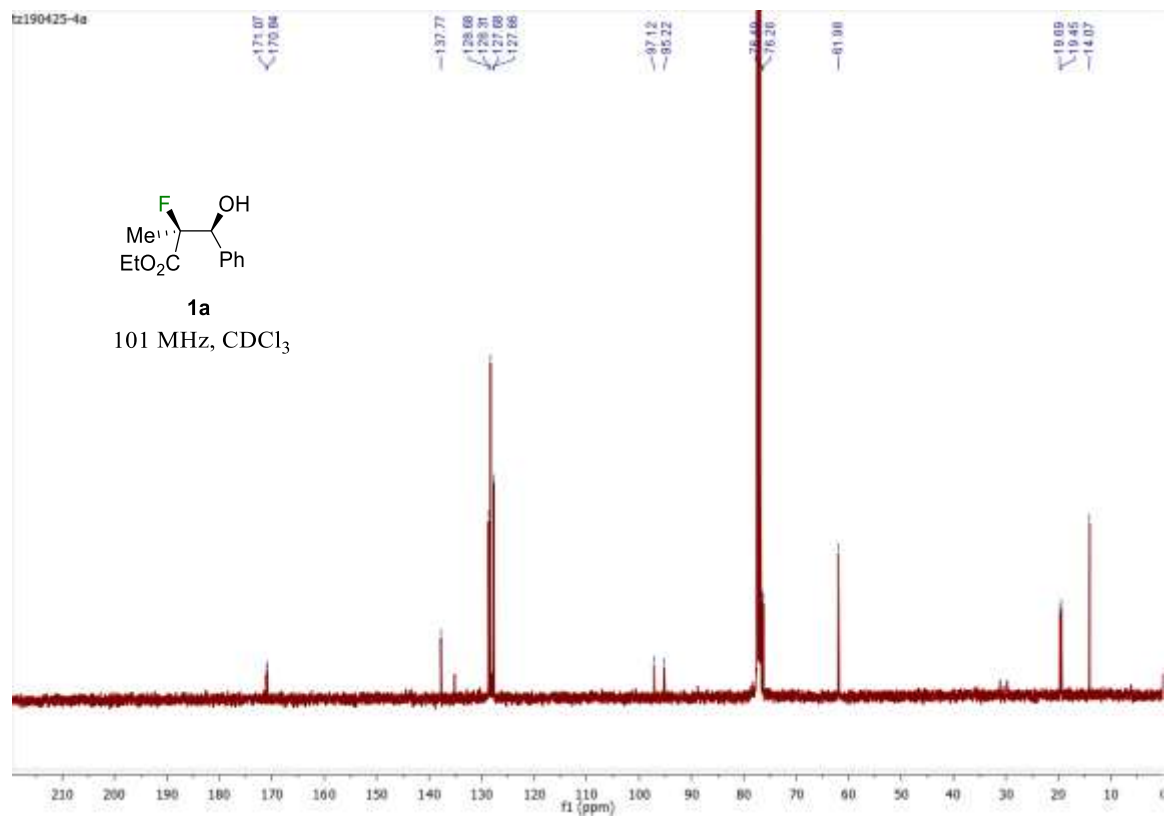

tz190425-4a

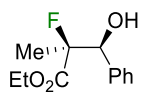

1a

376 MHz, CDCl<sub>3</sub>

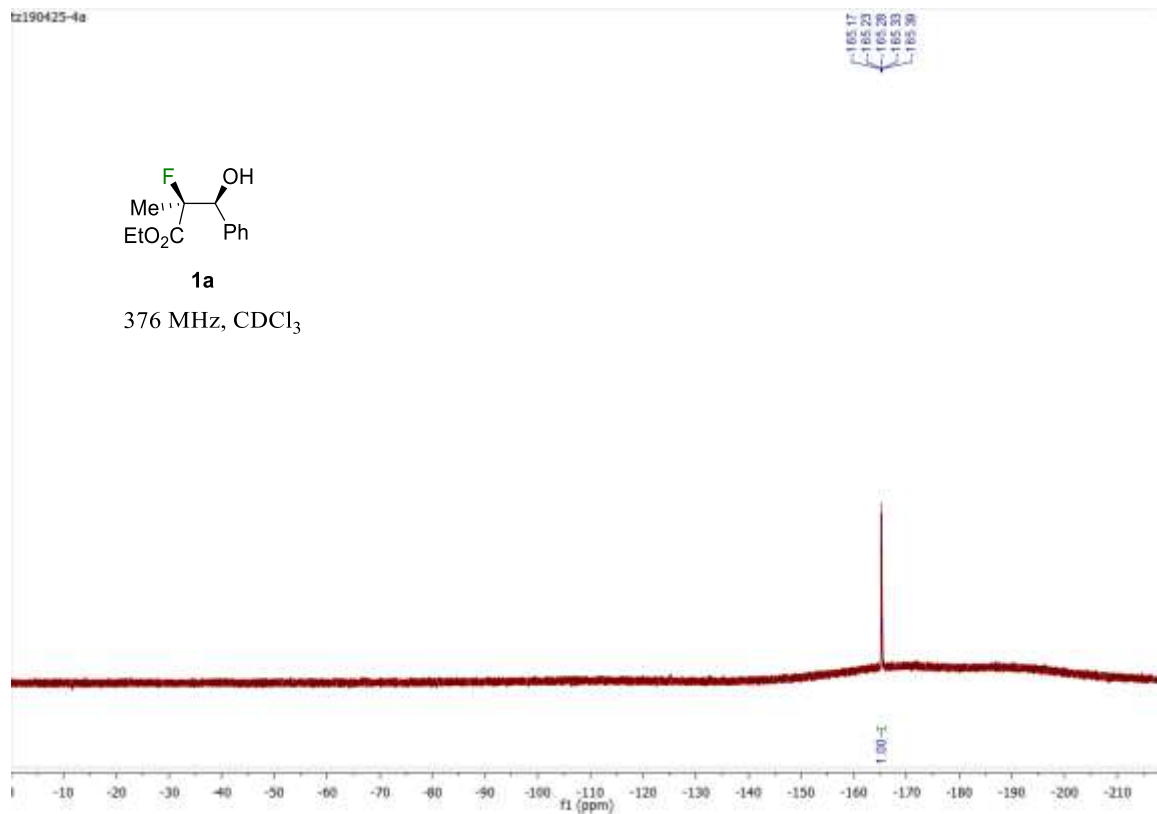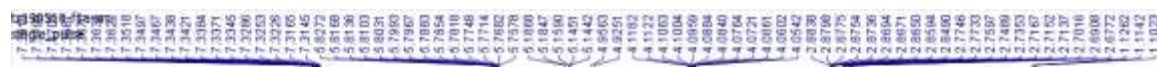



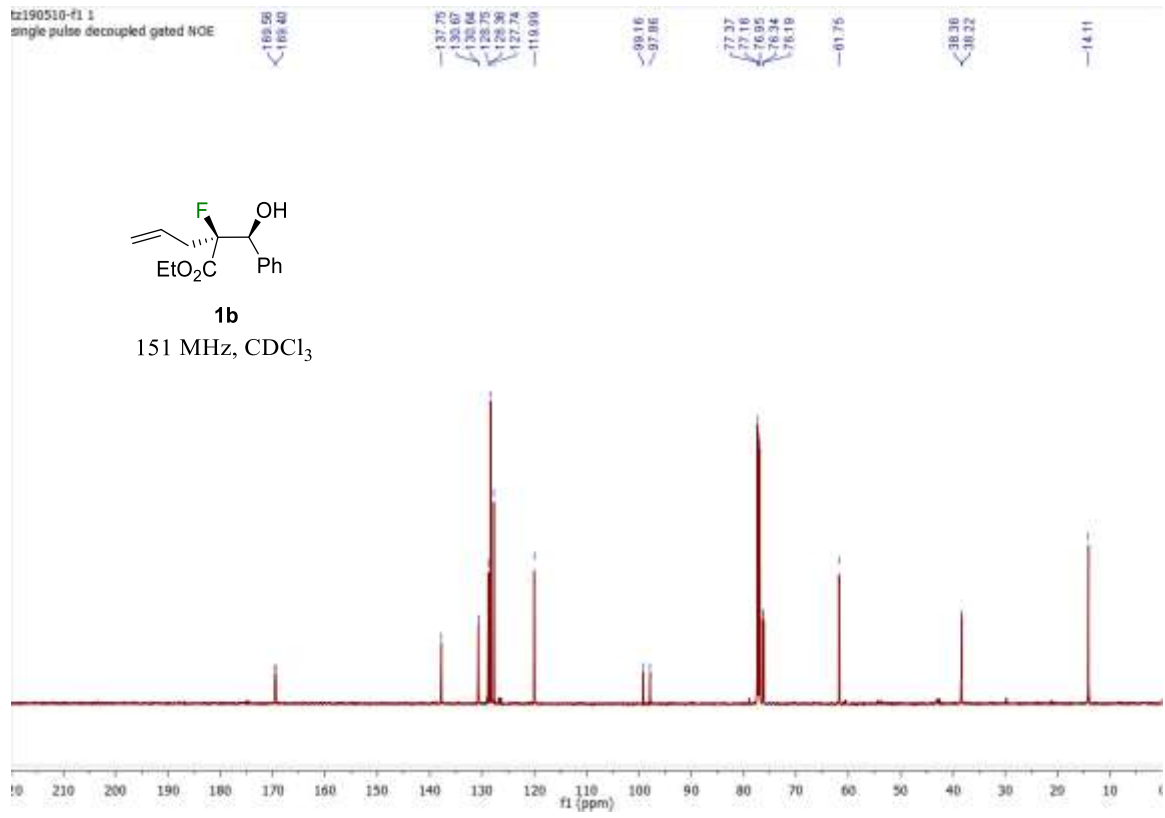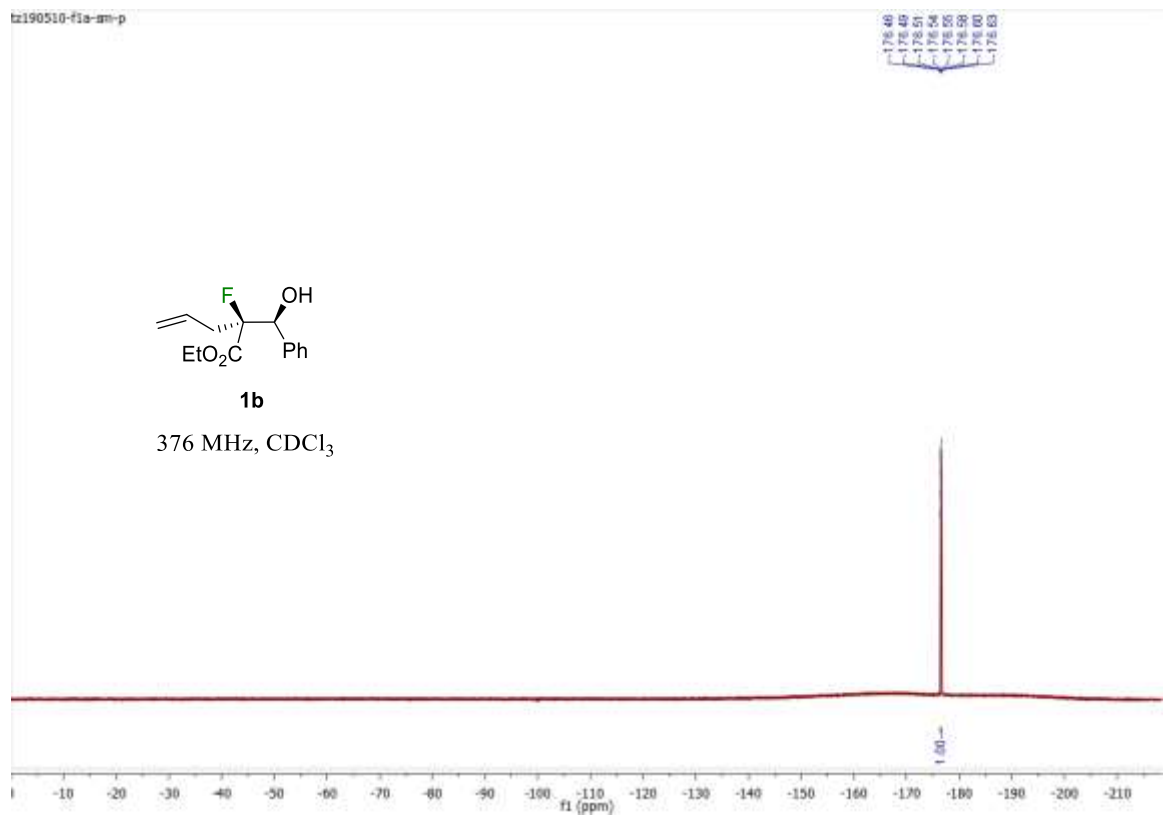

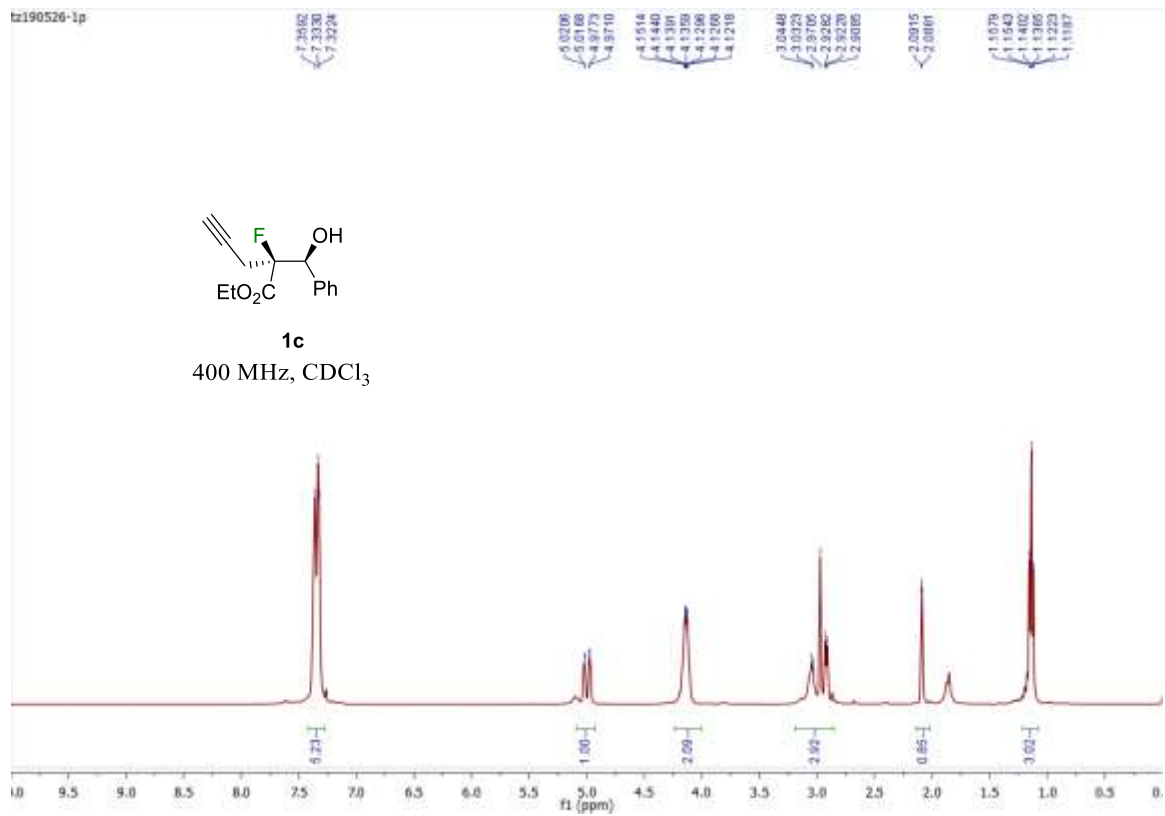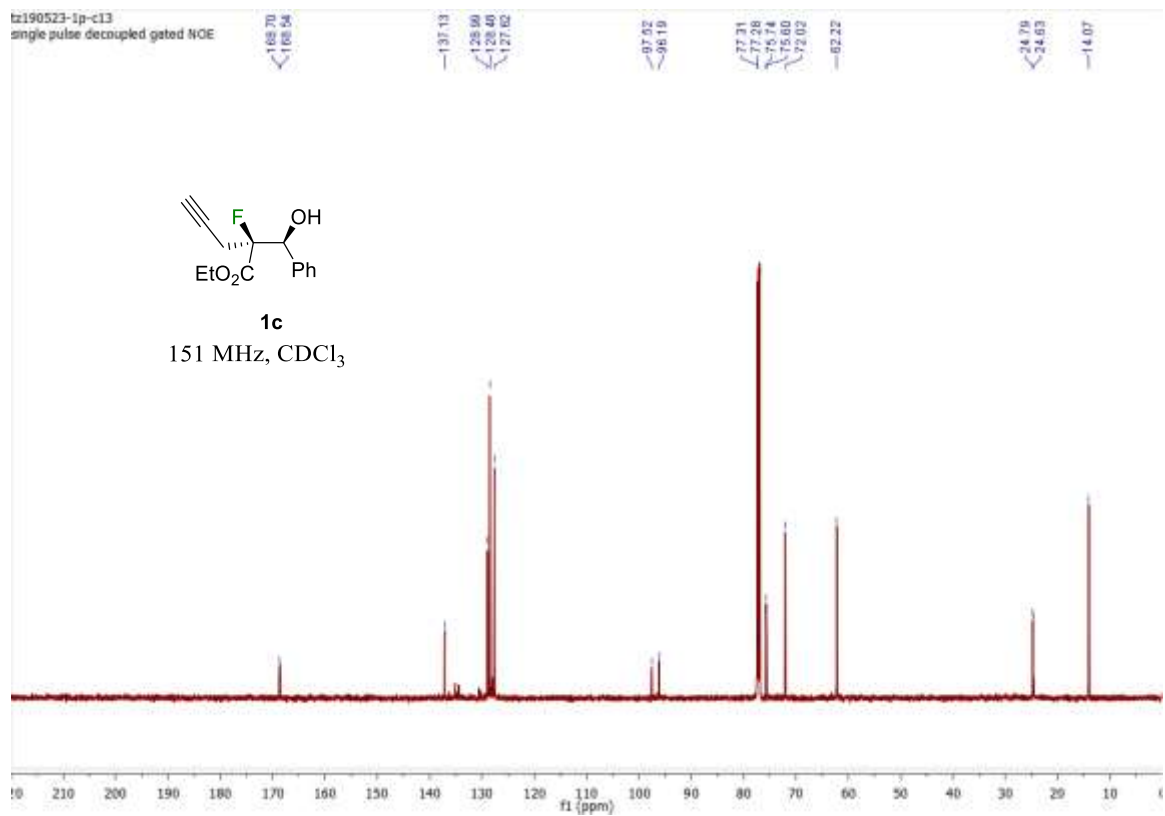

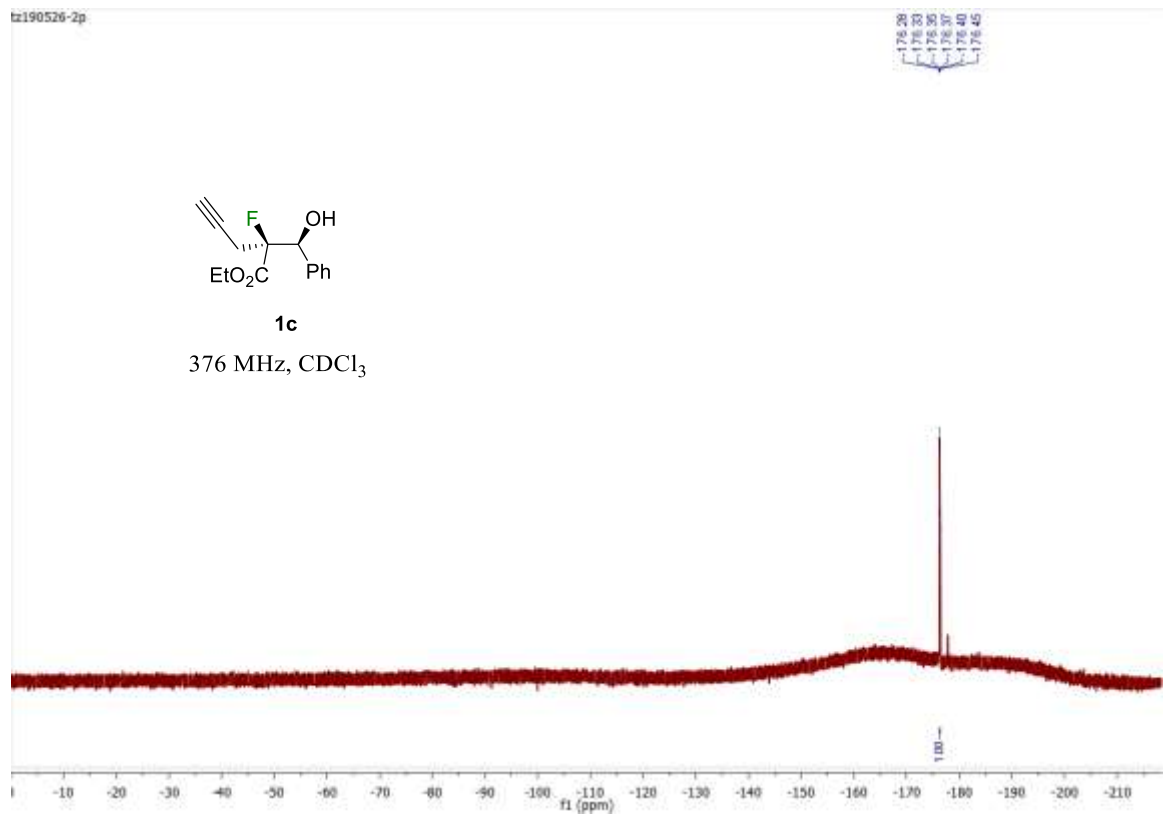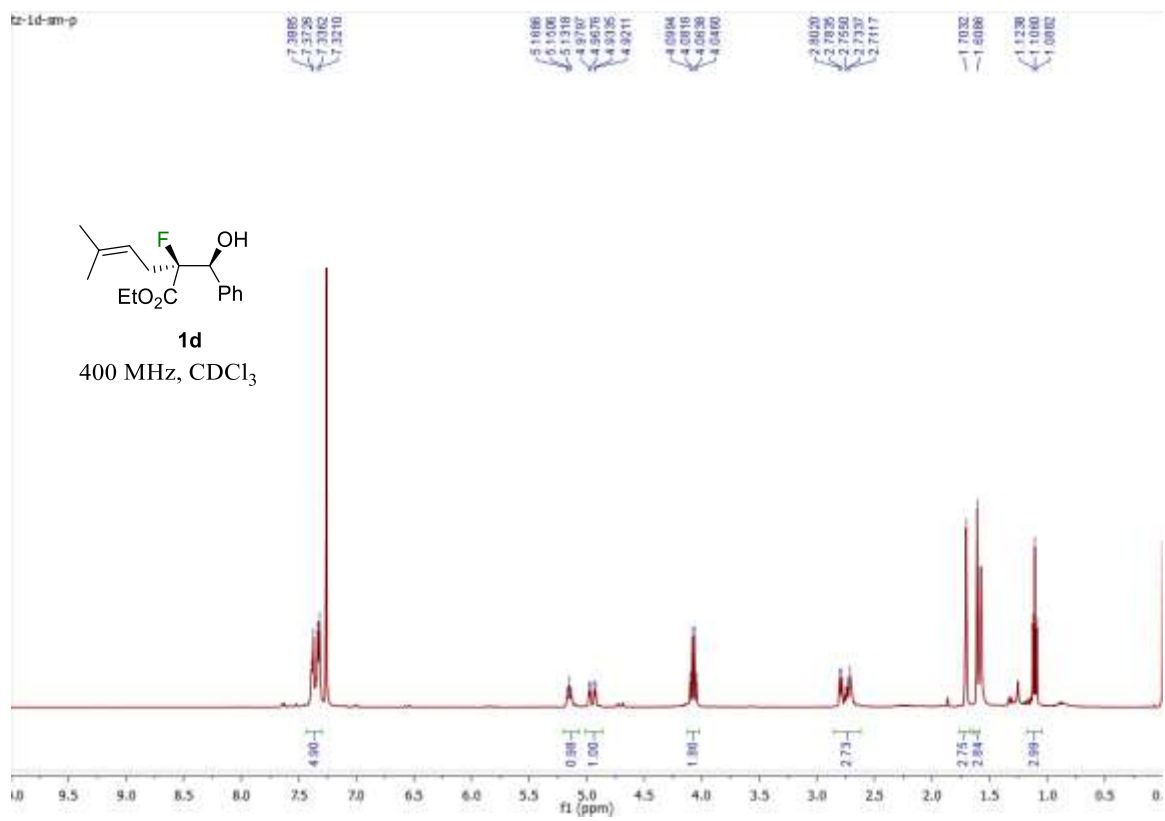

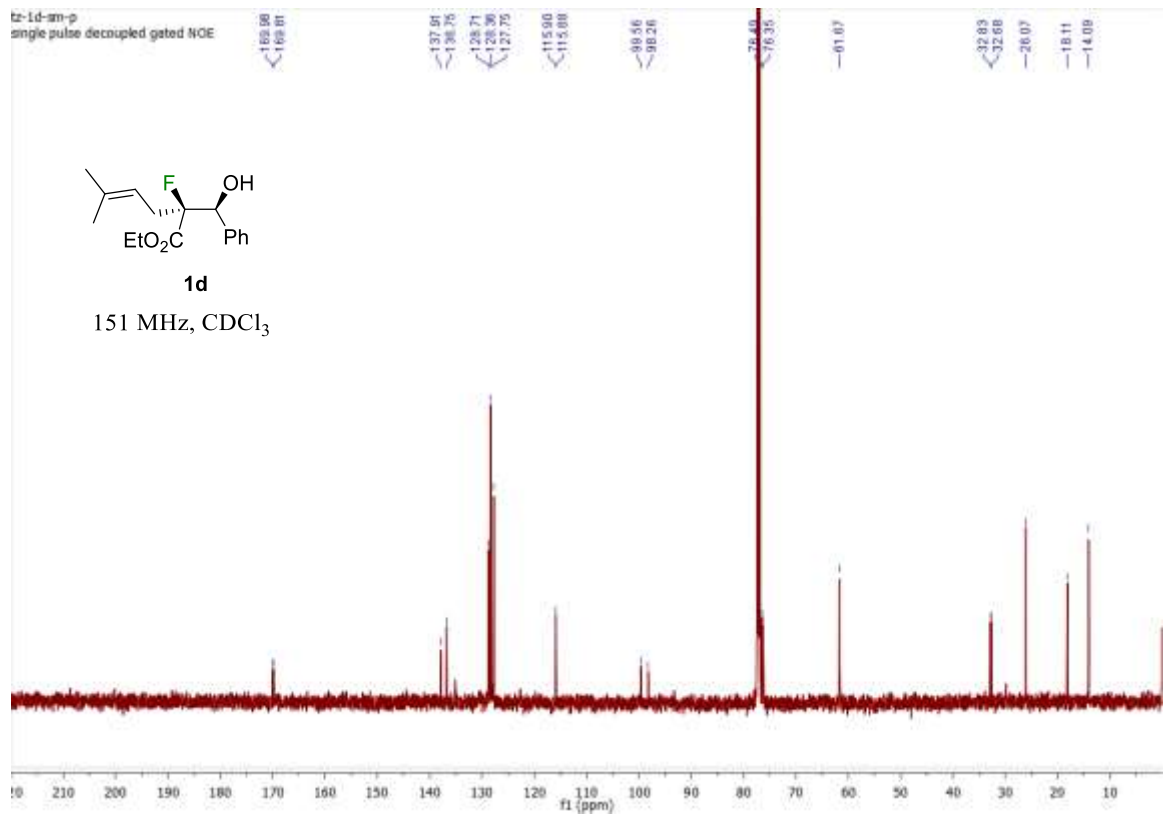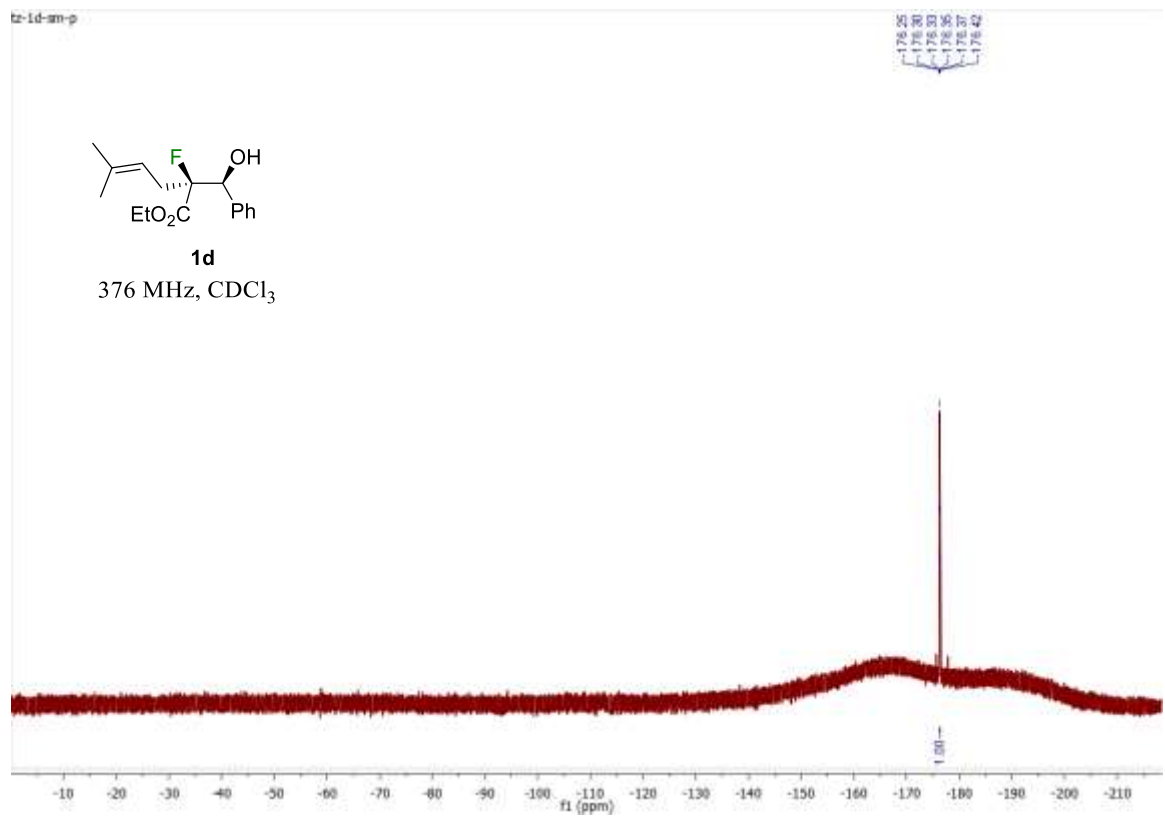

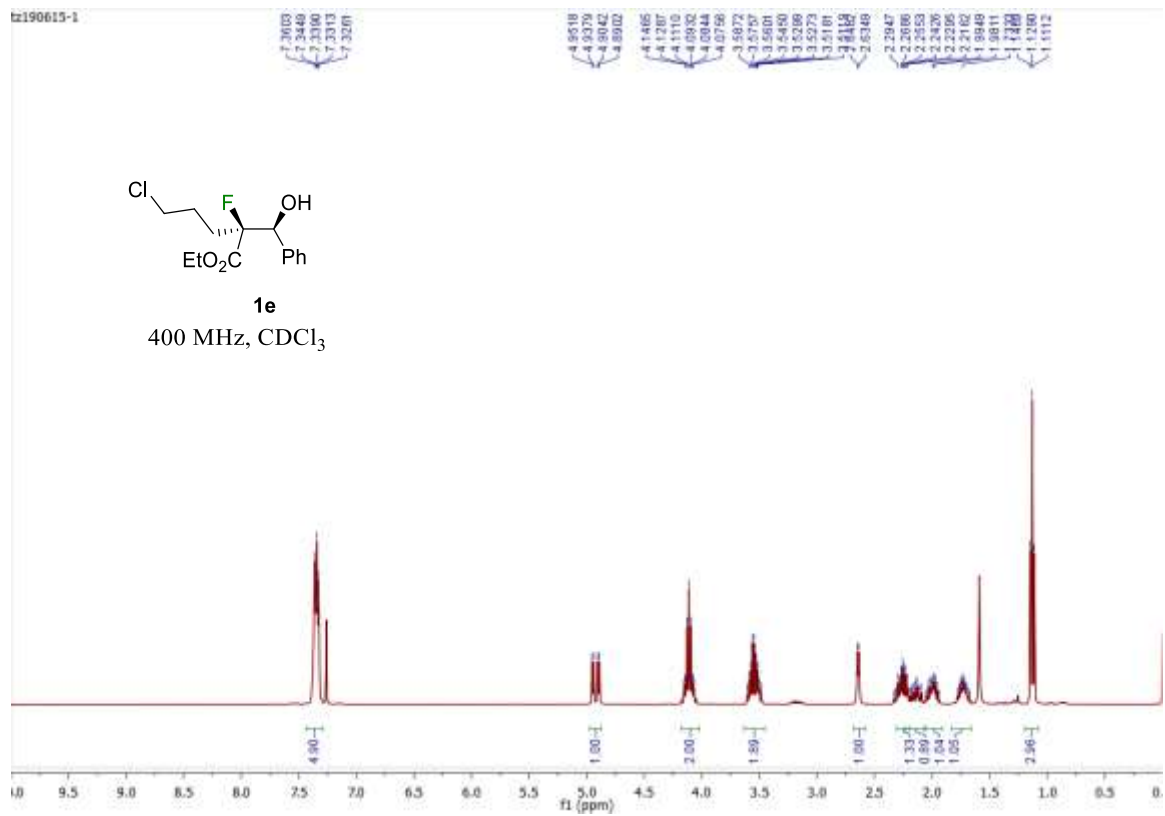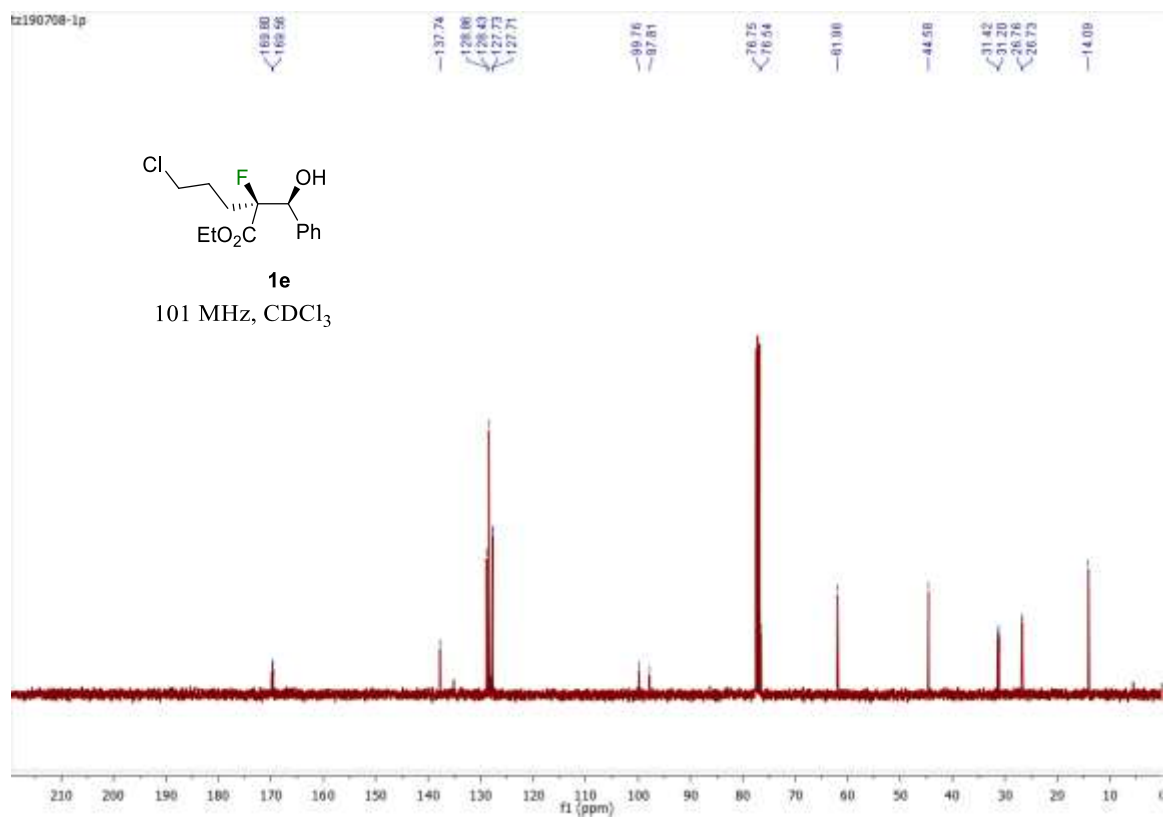

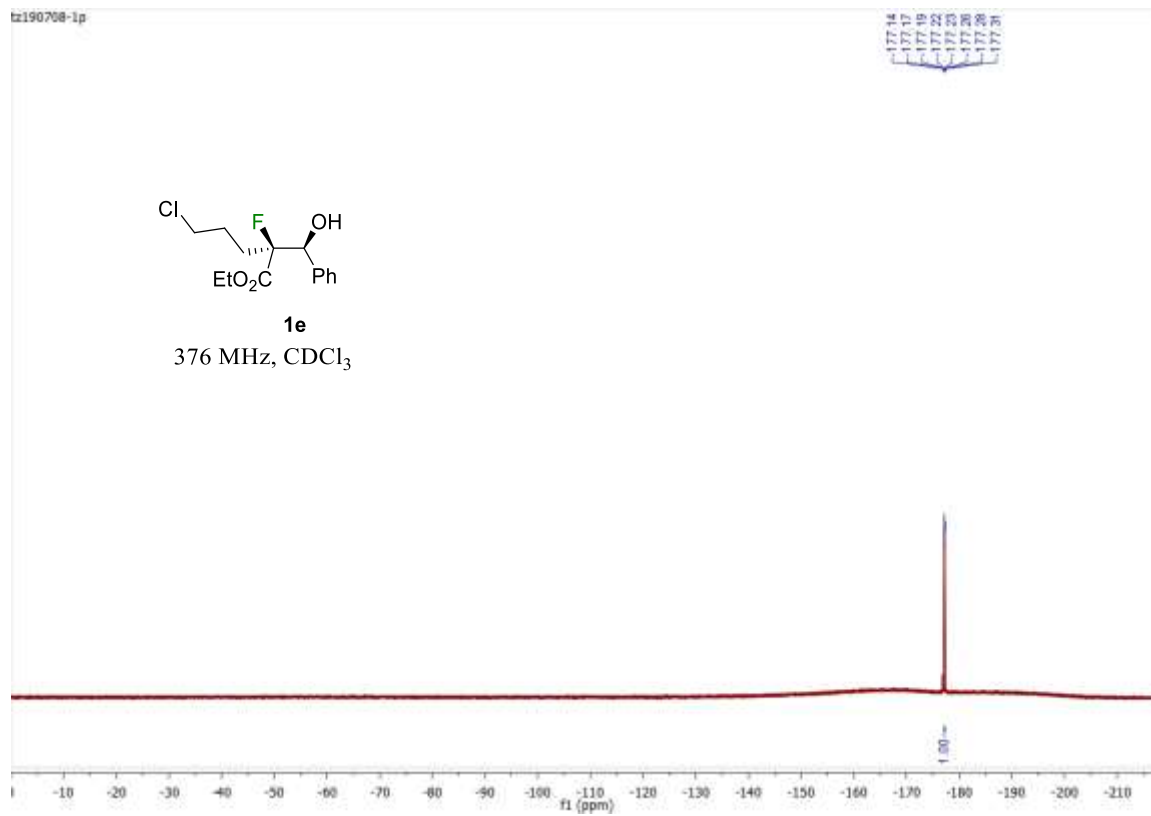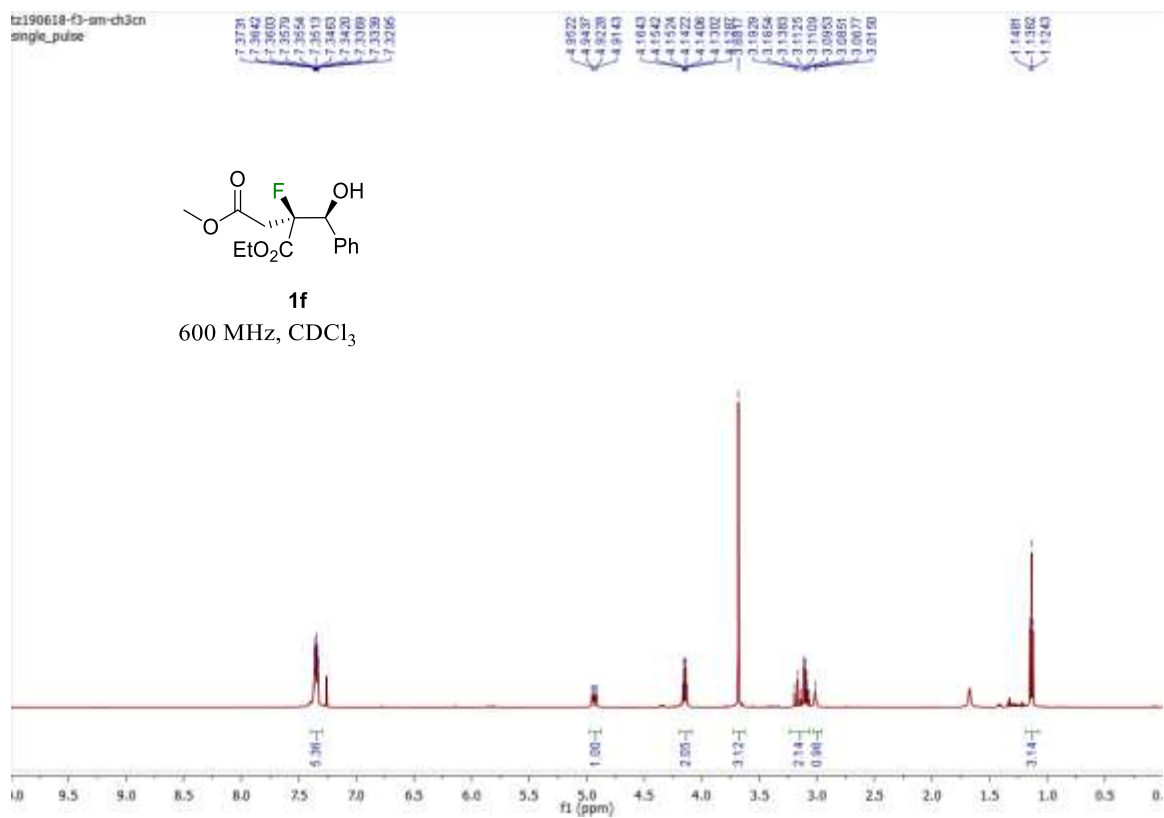

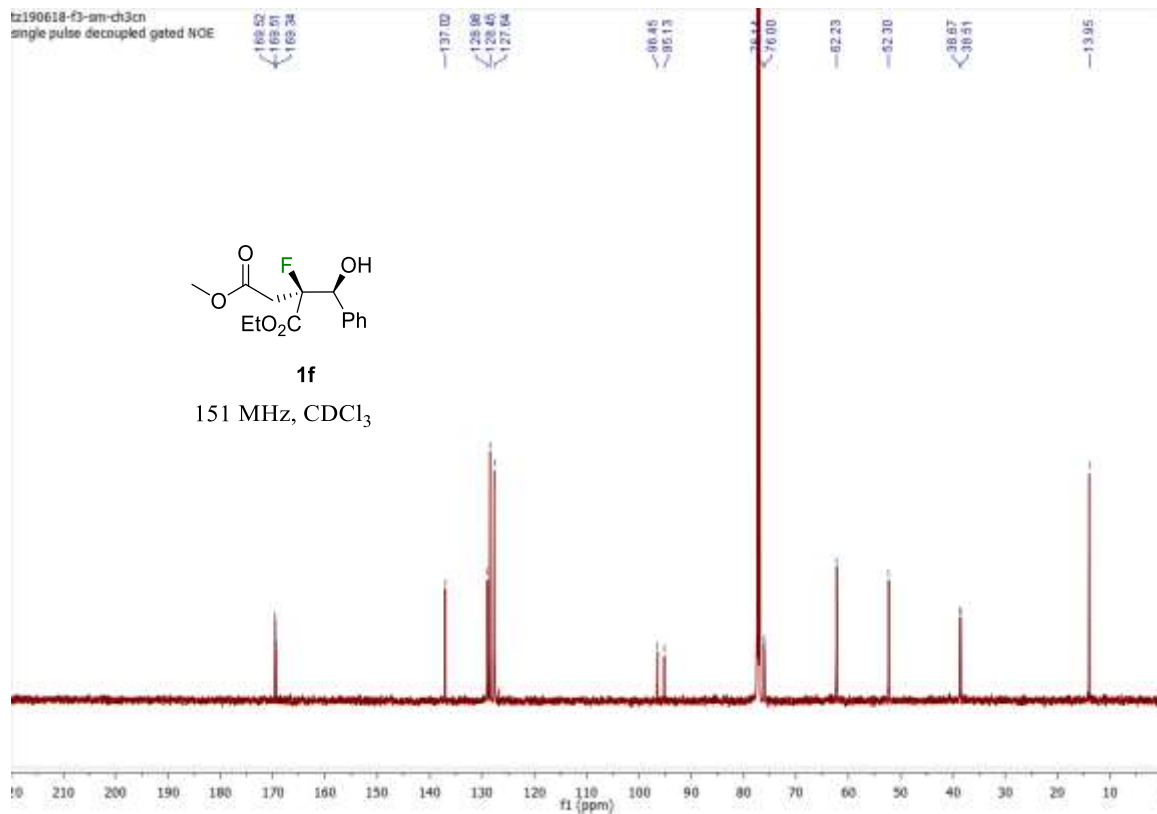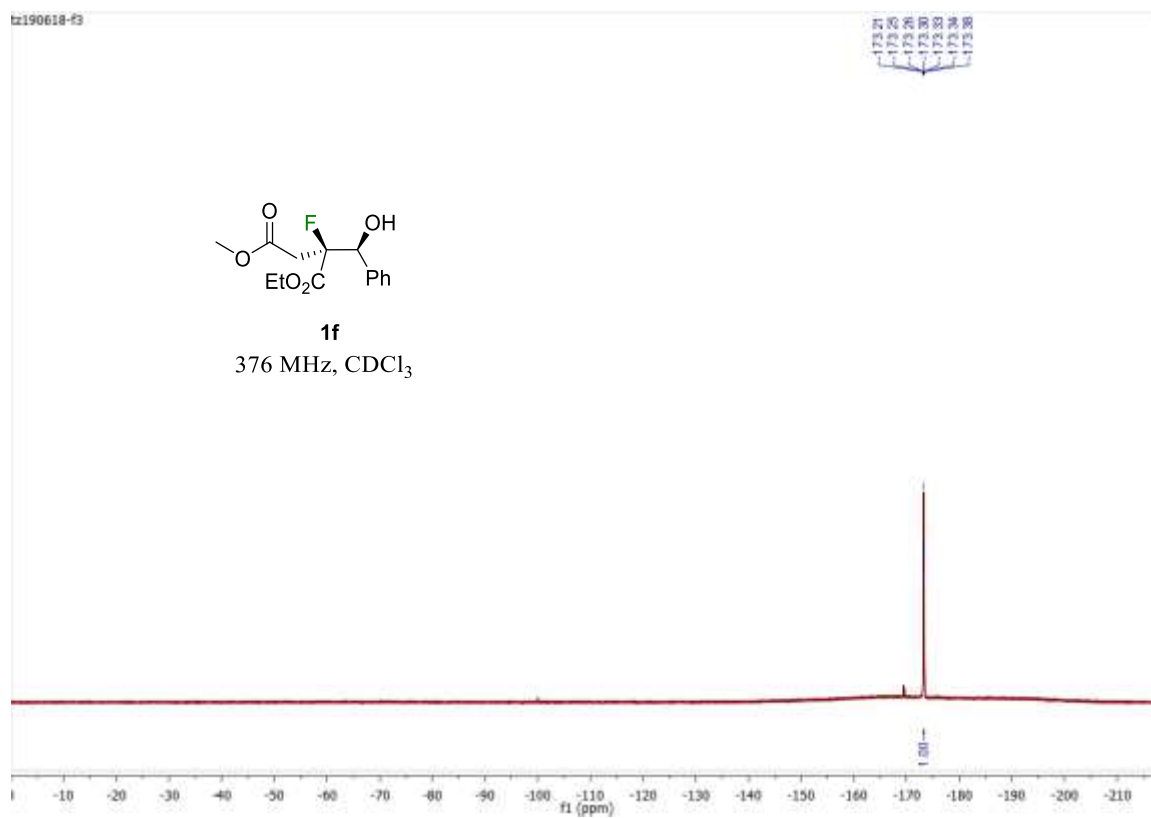

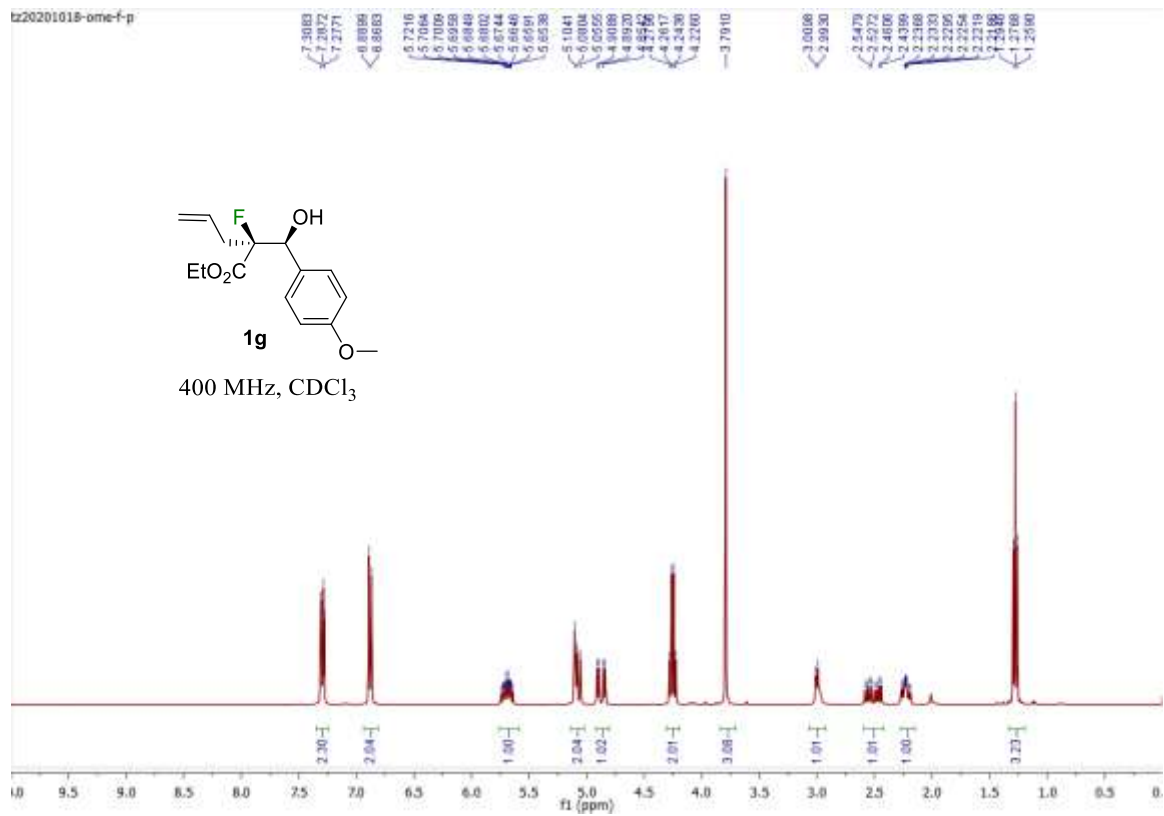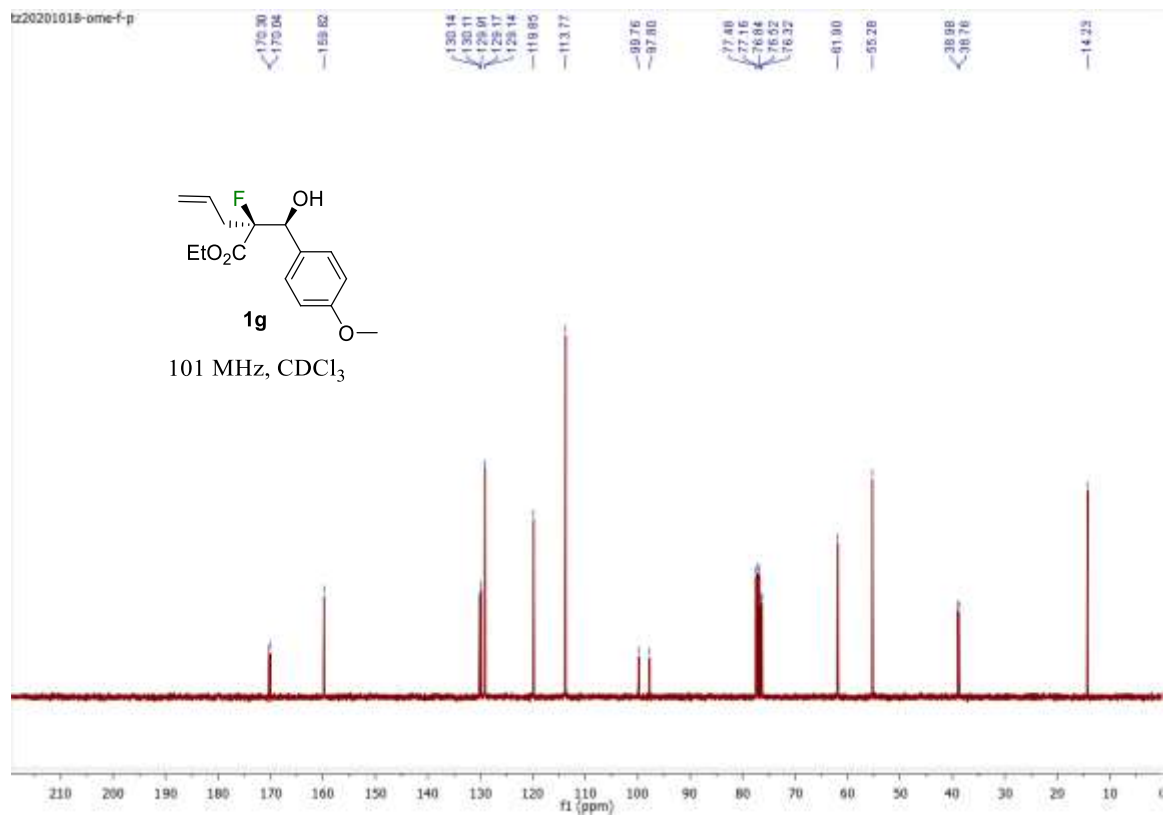



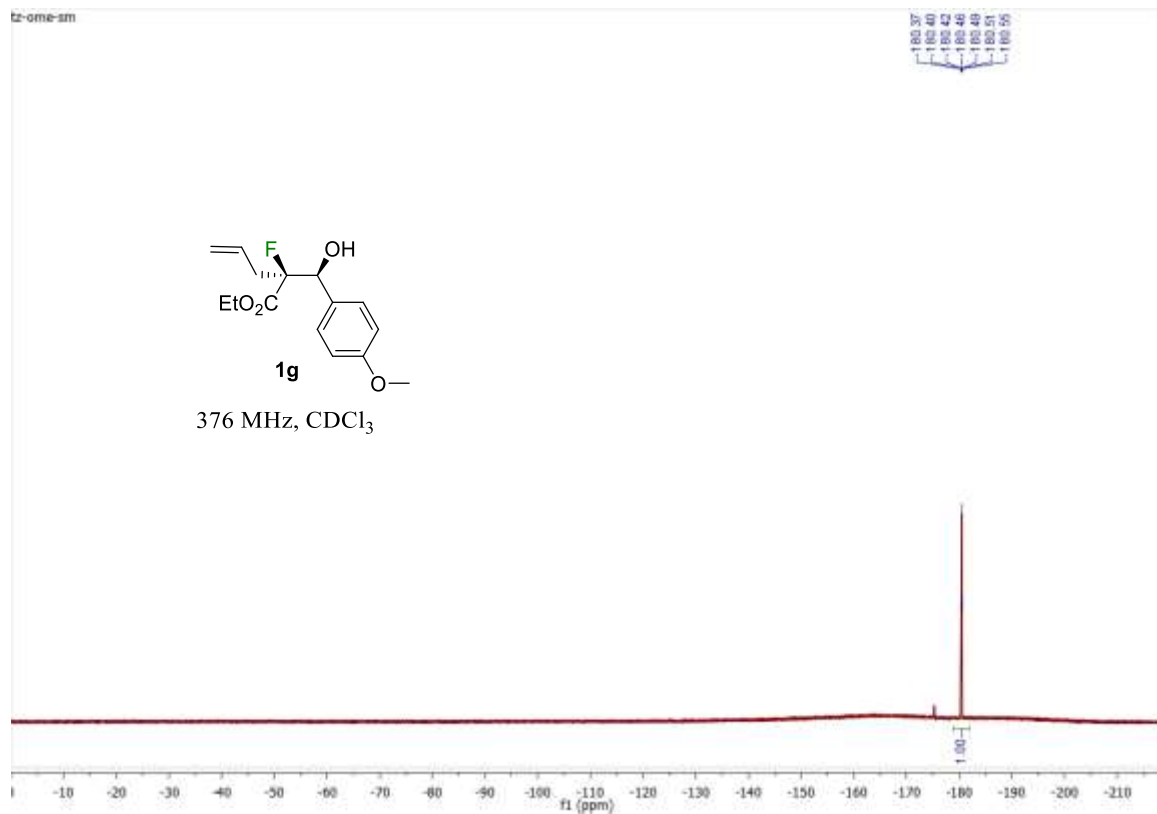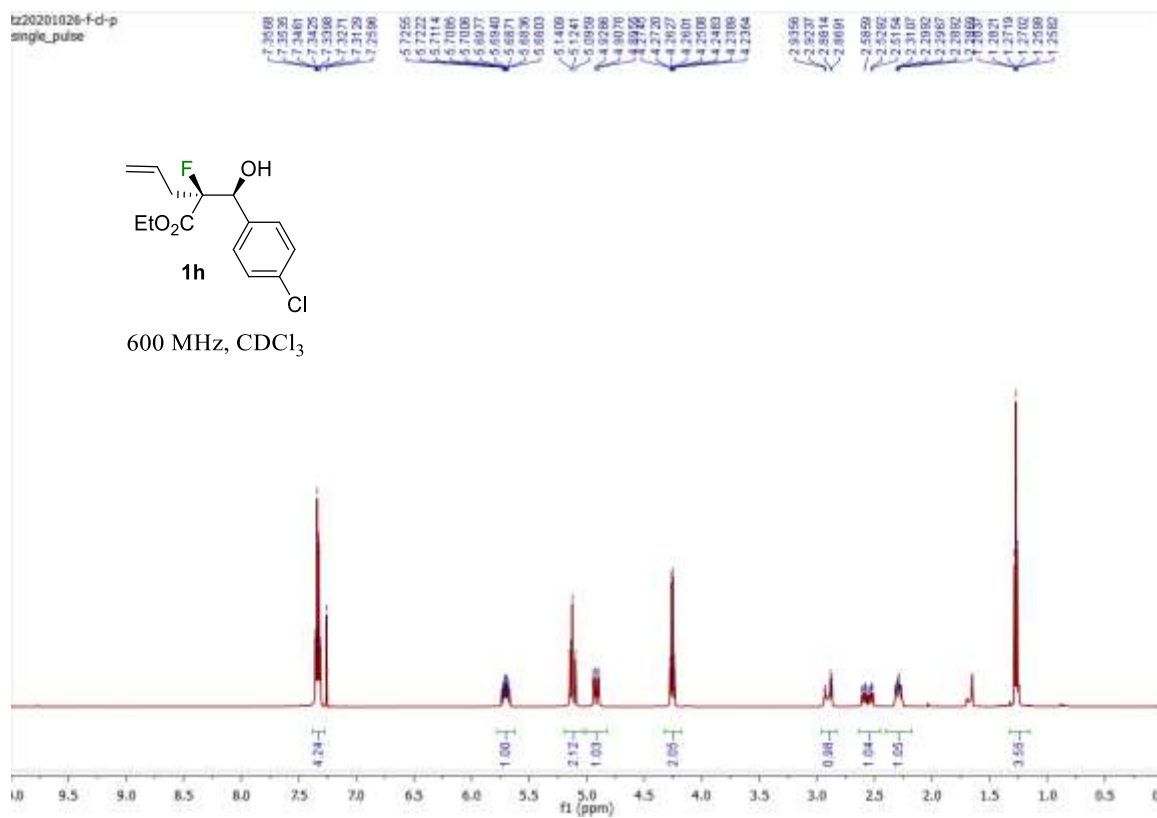

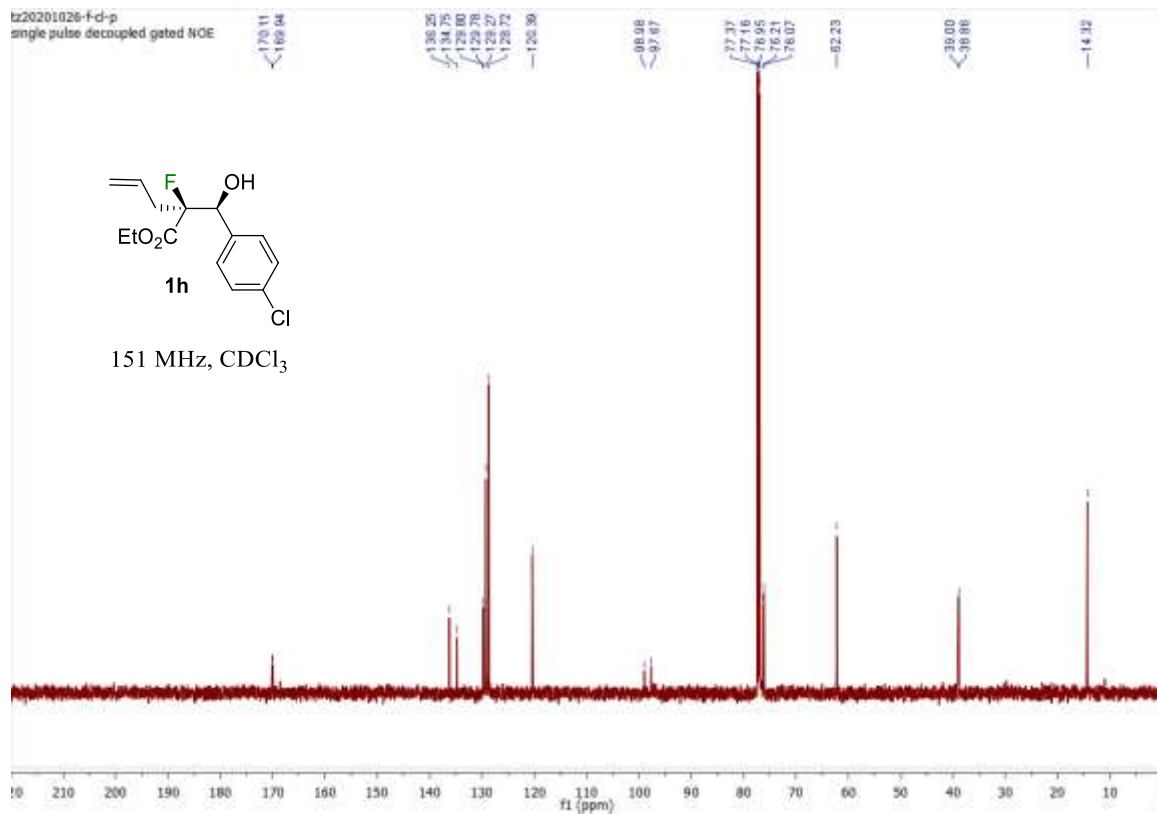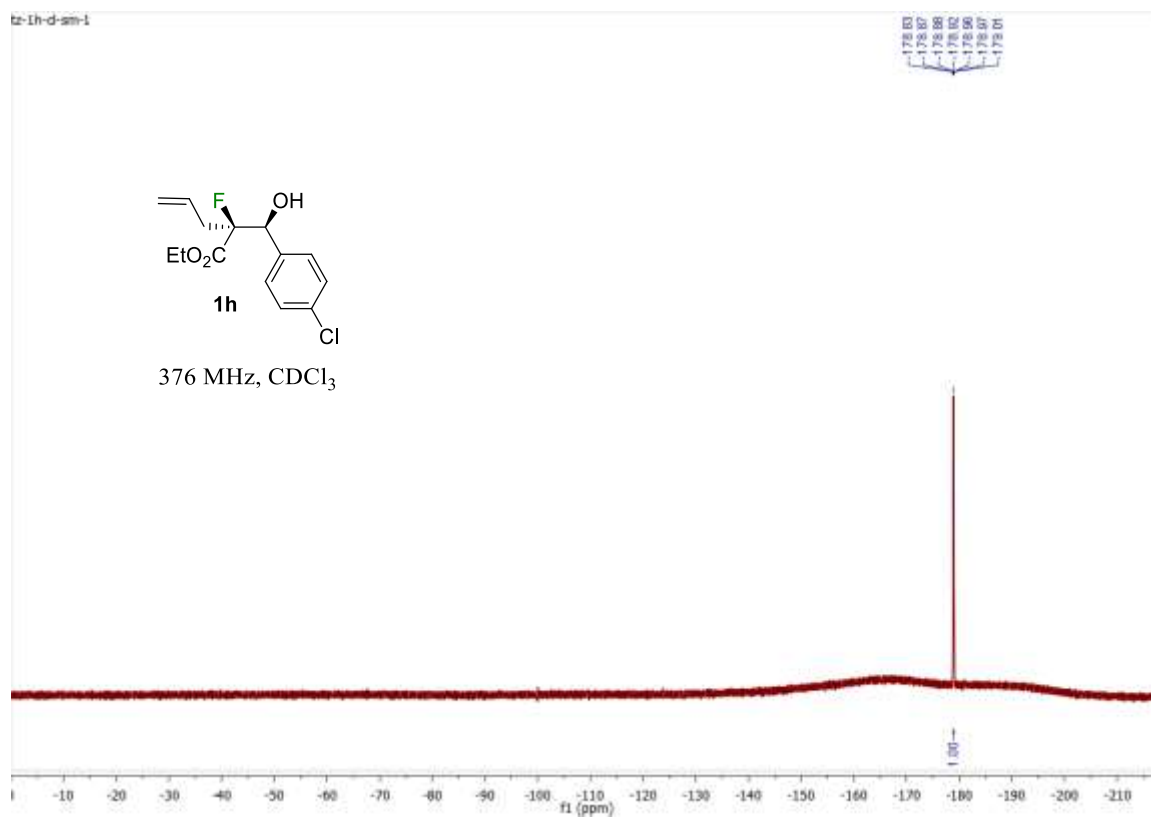

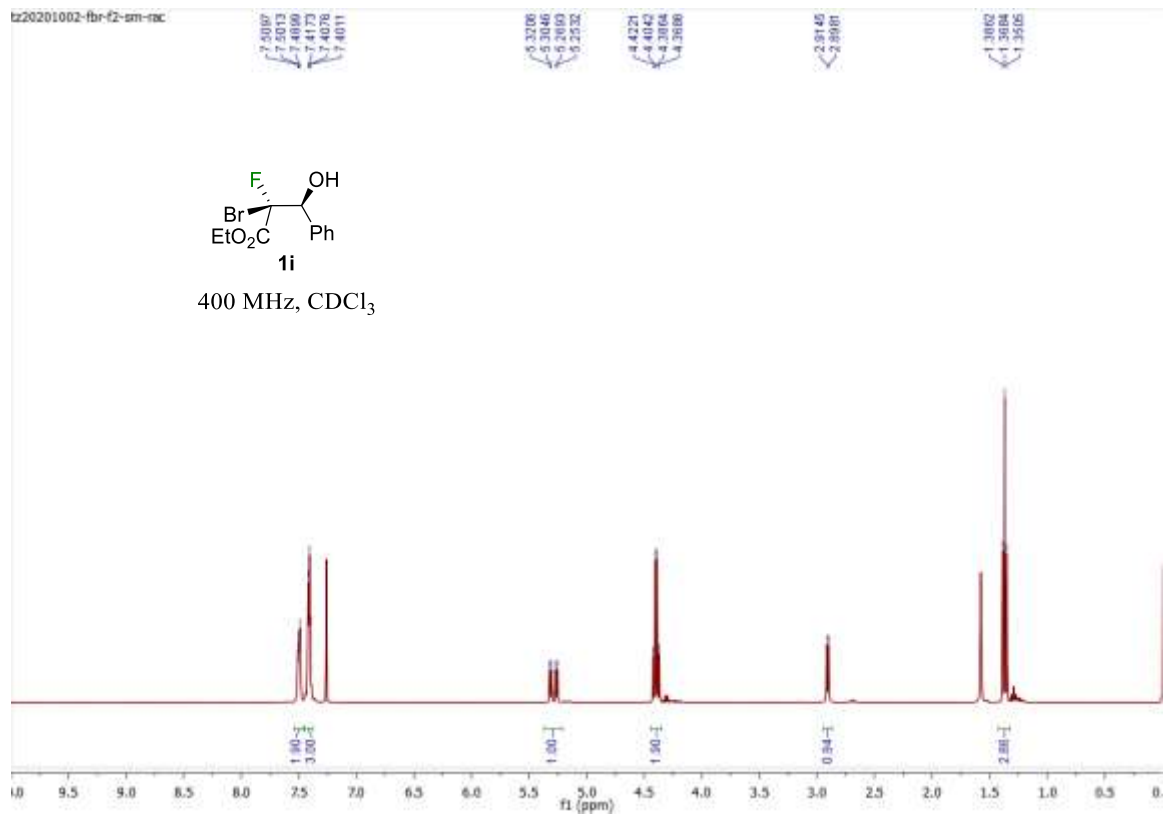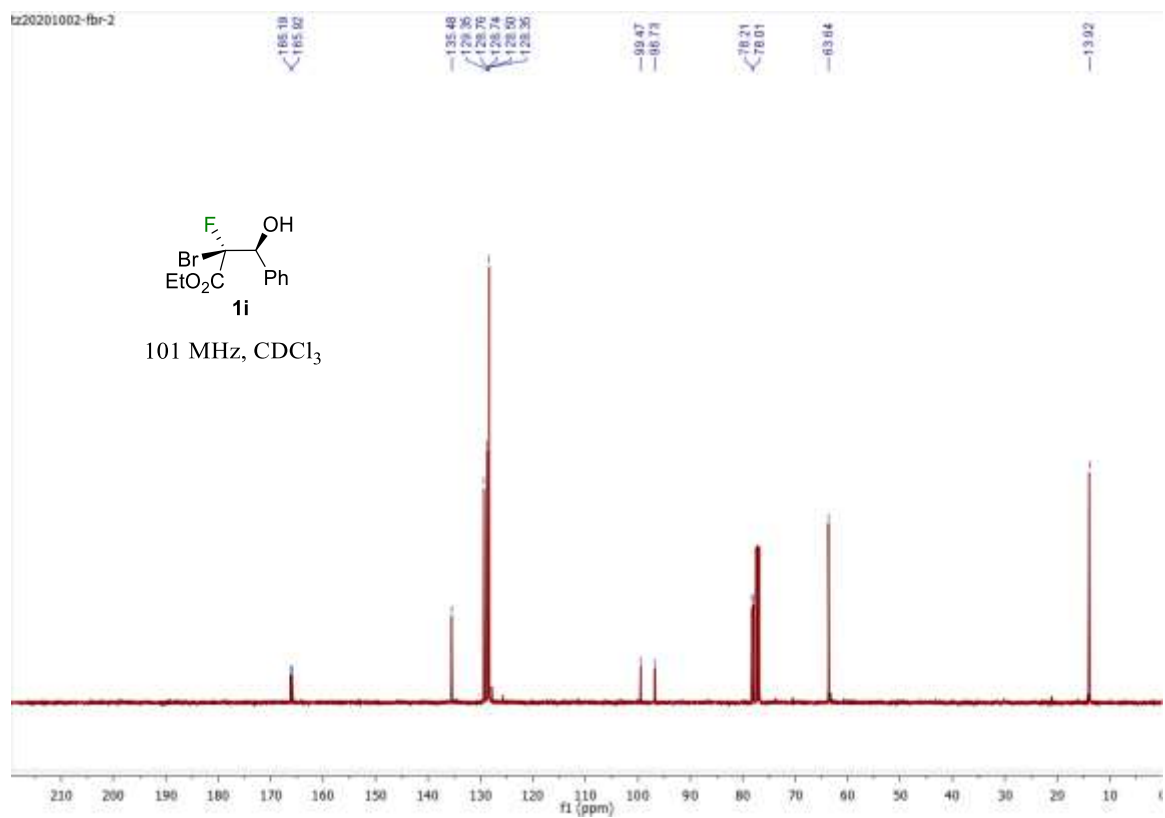

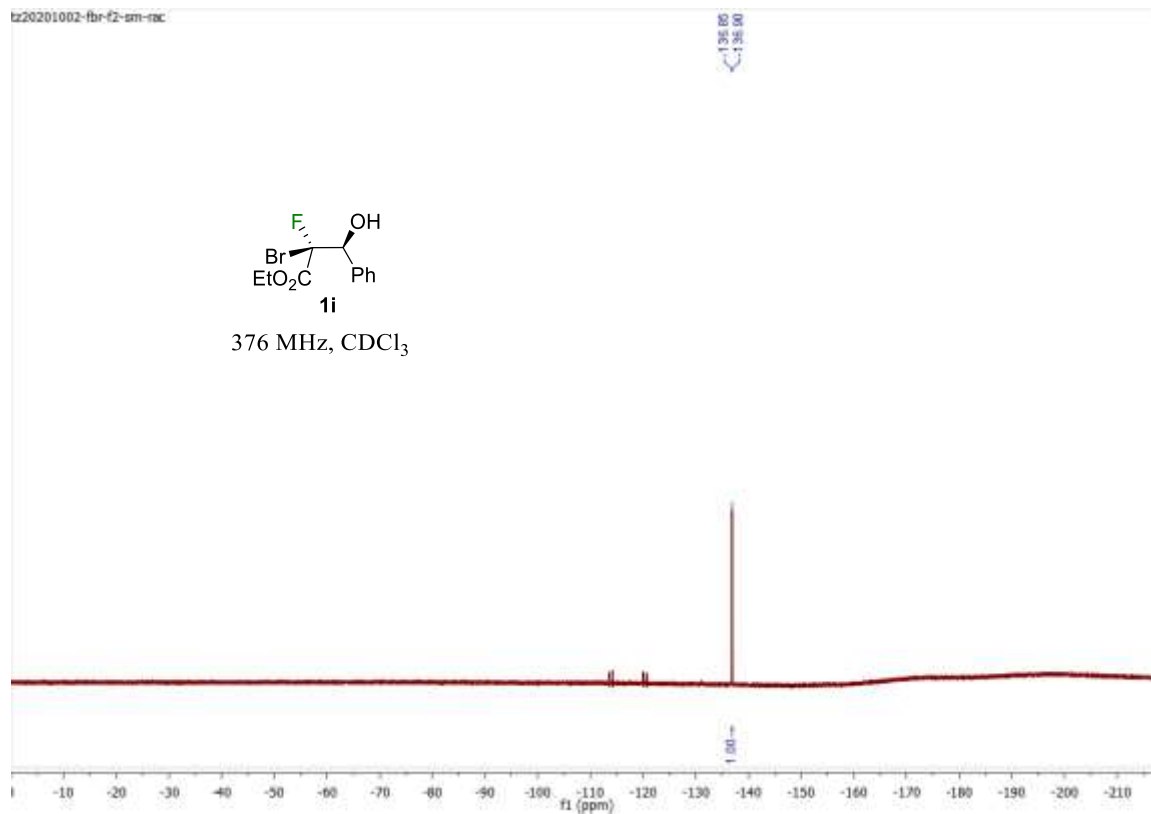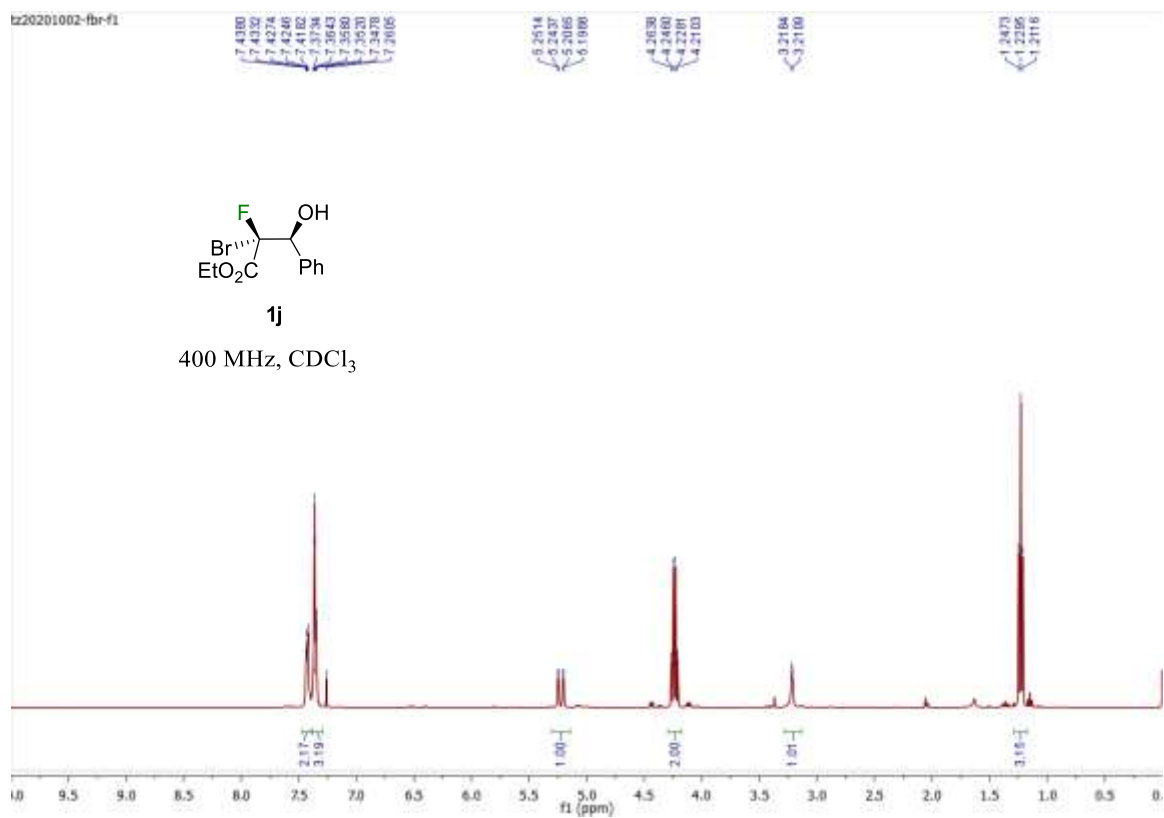

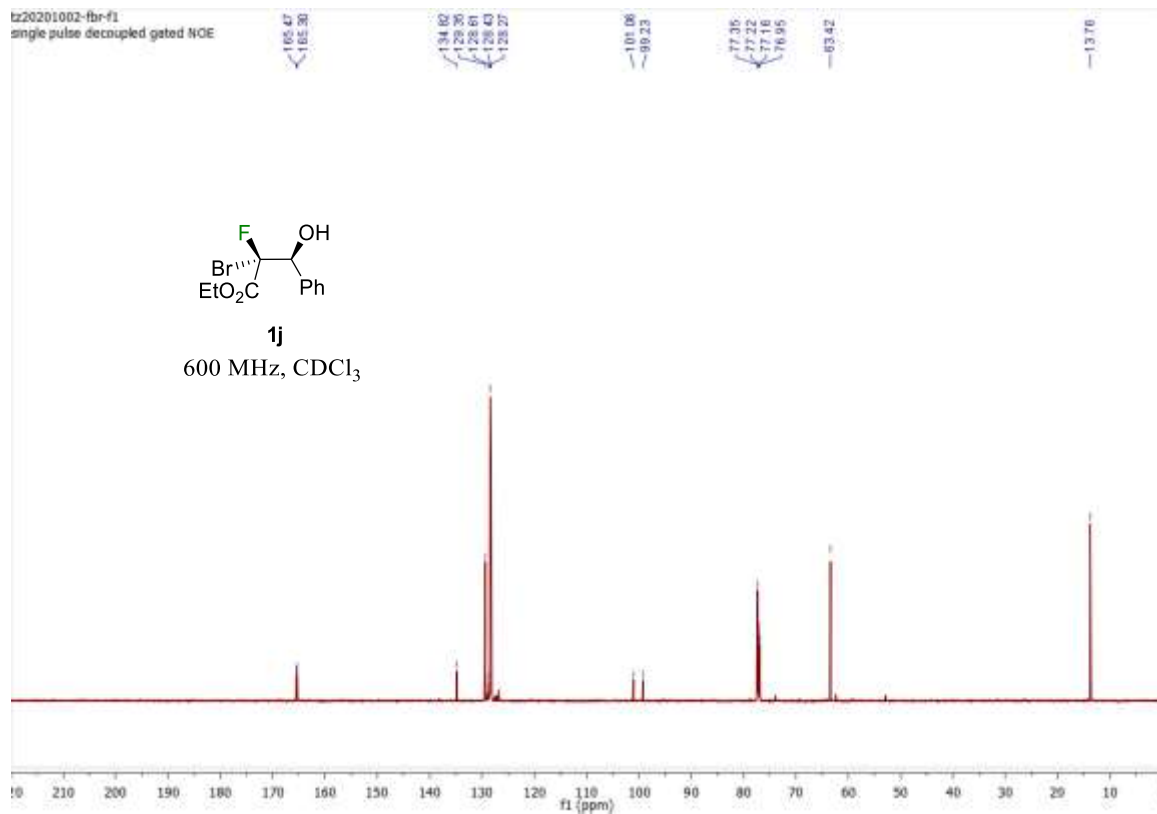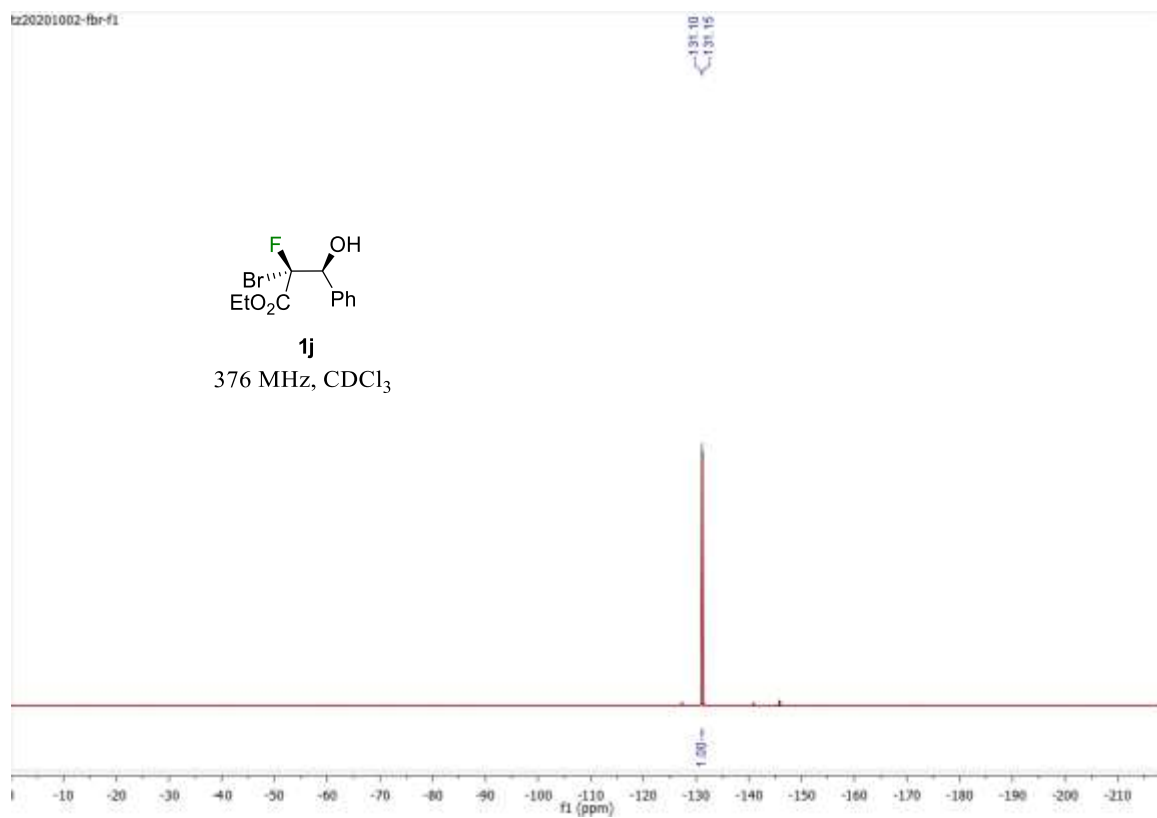

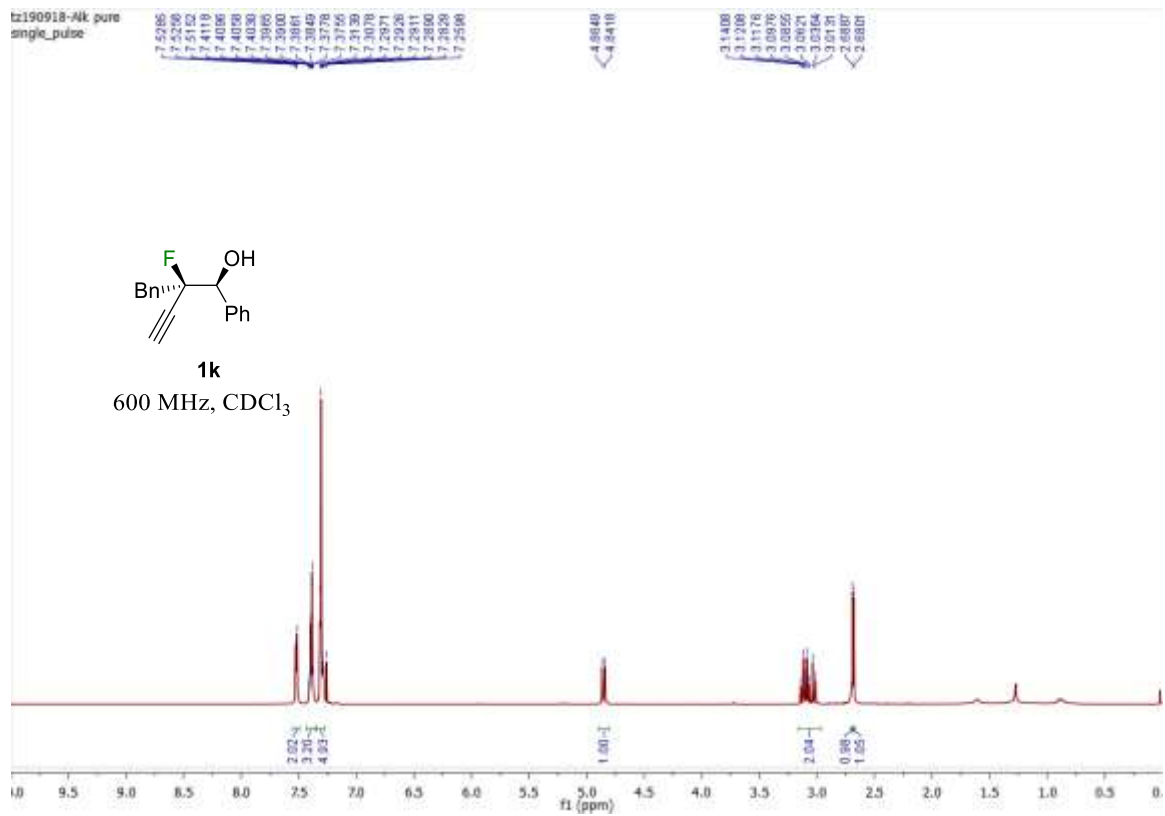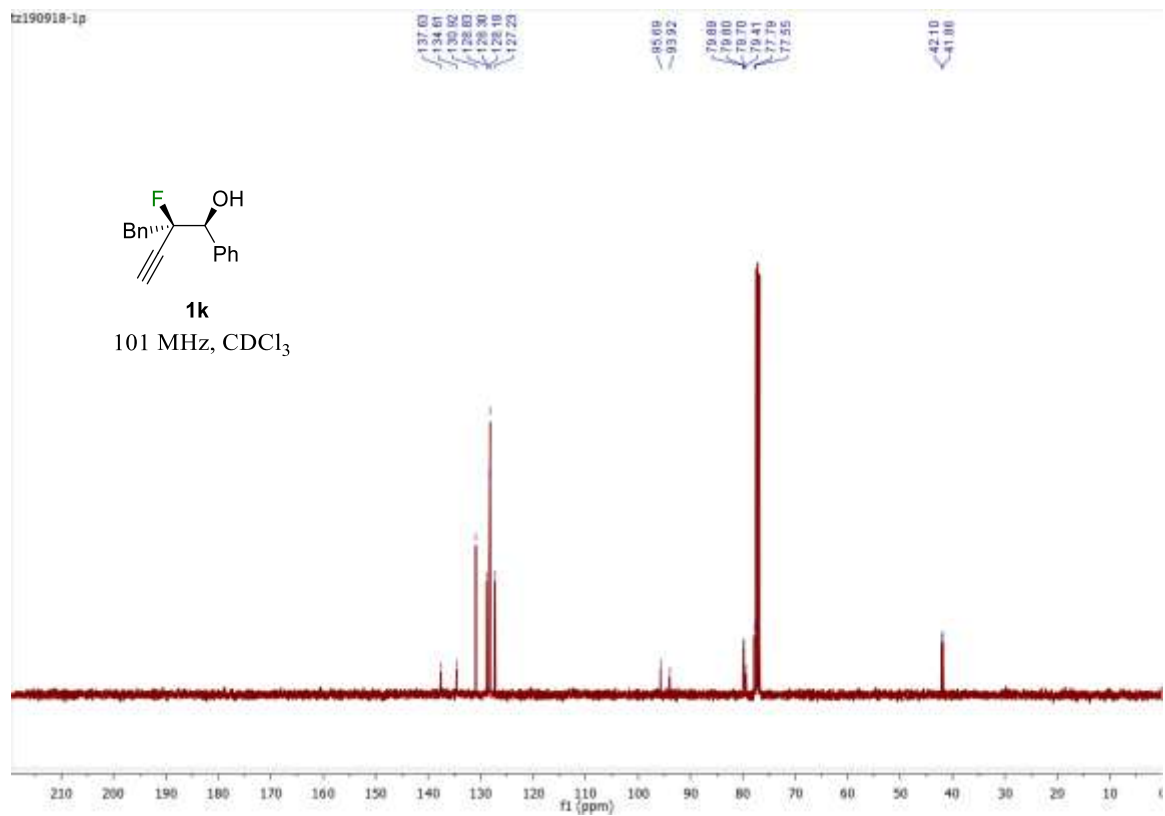

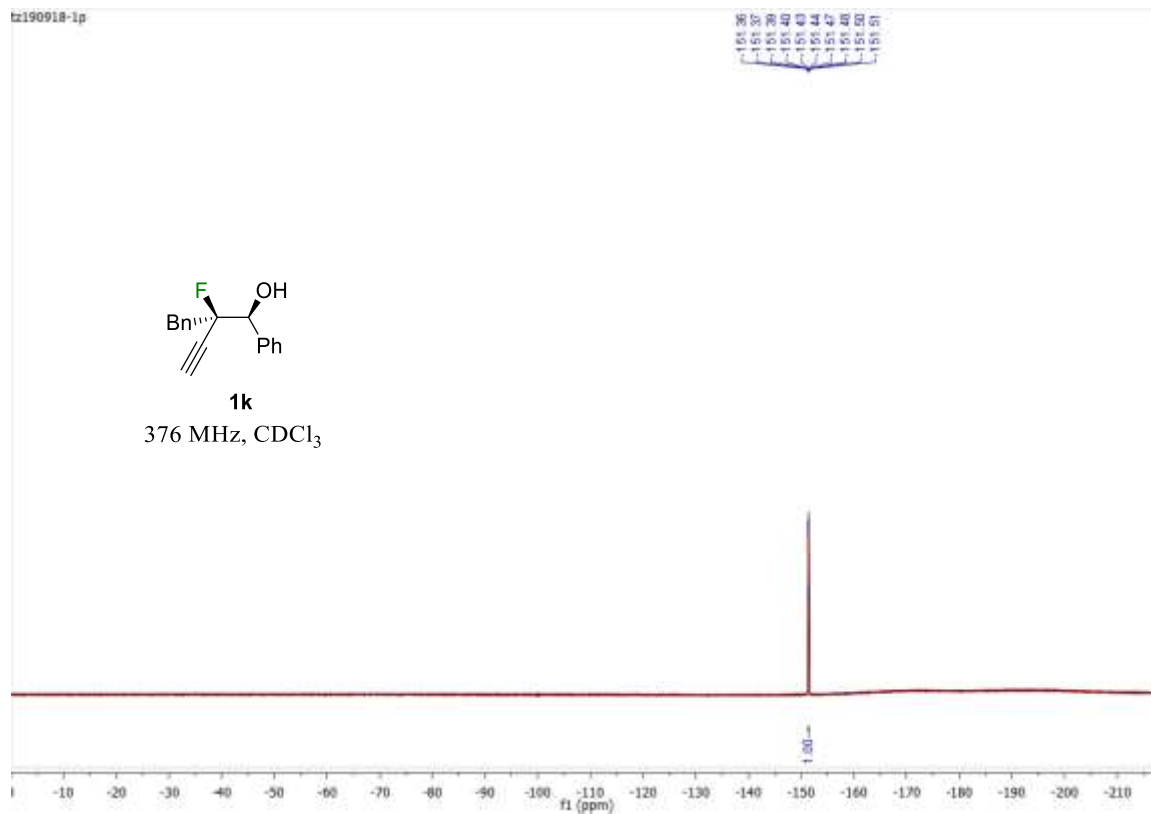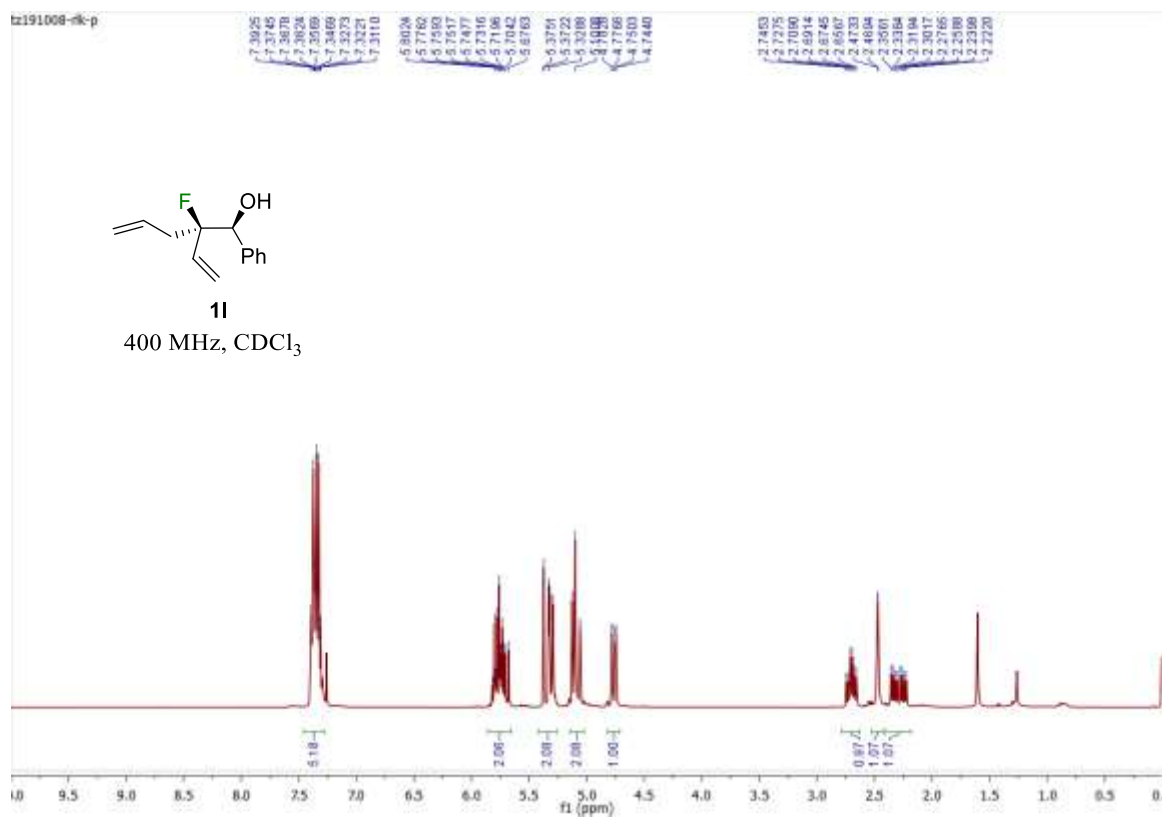

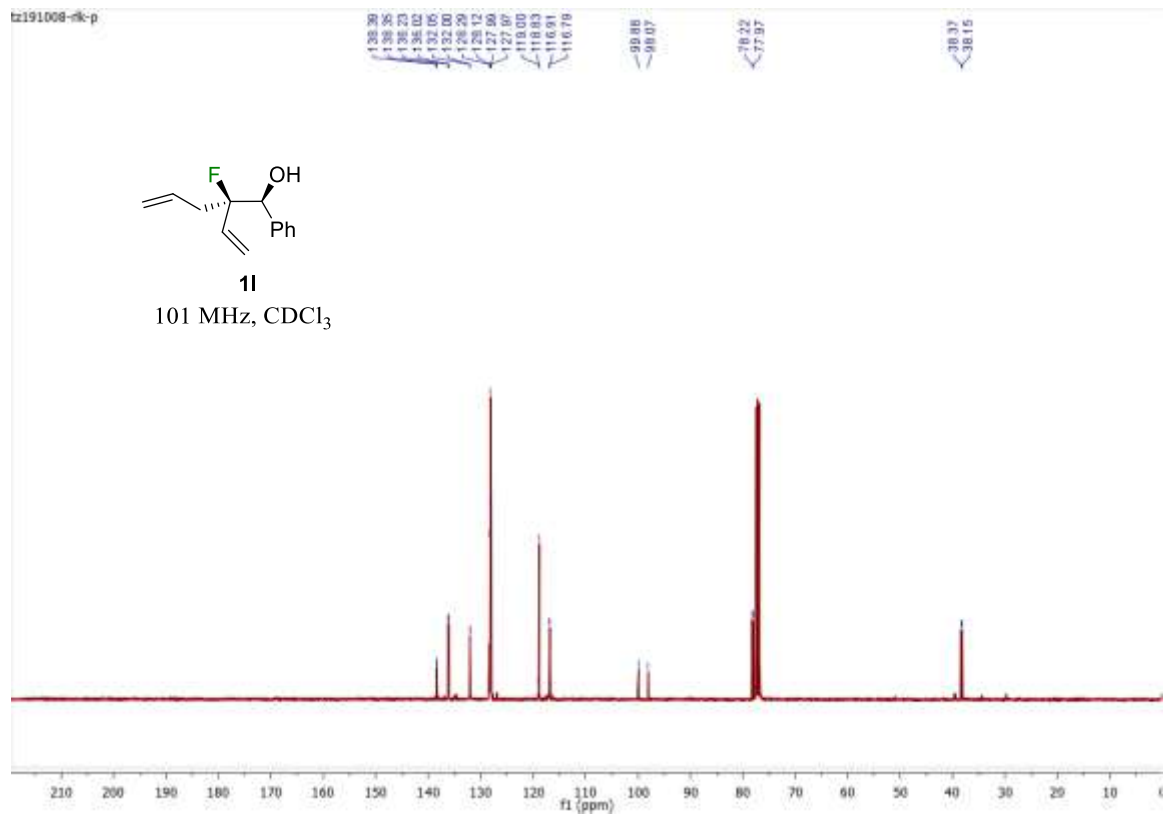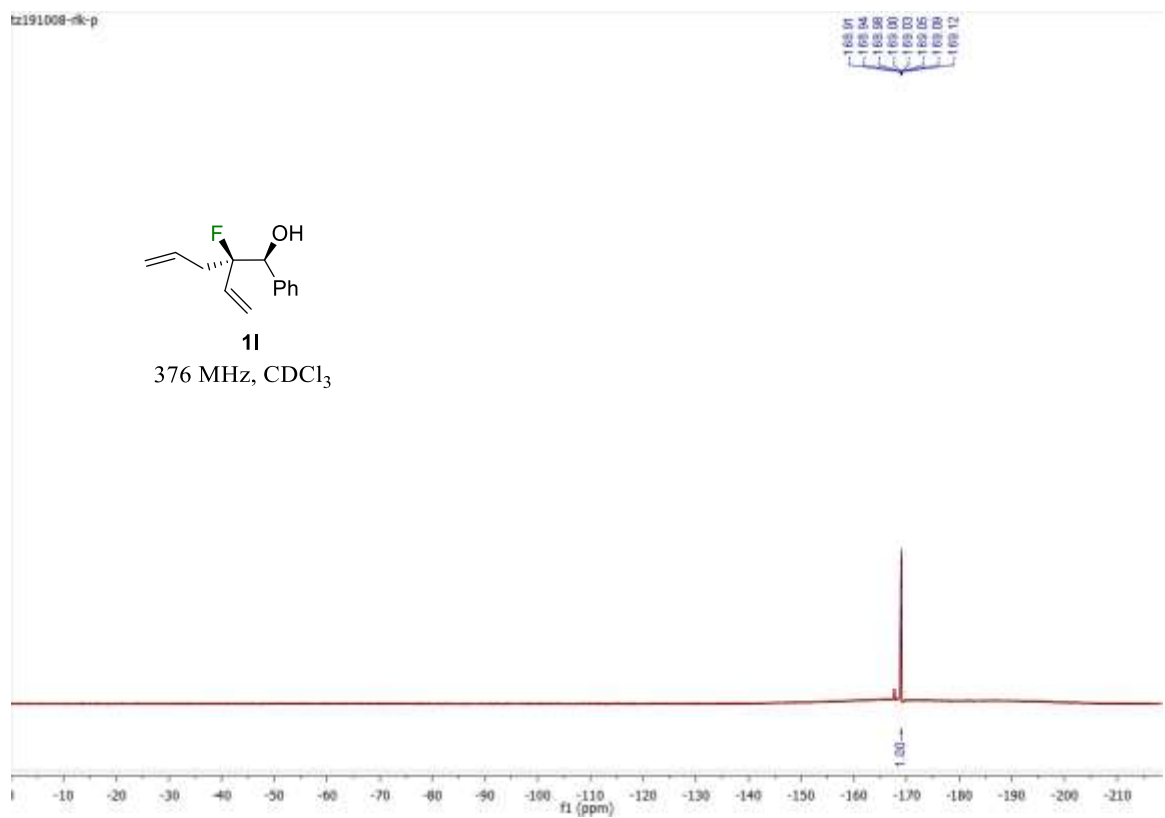





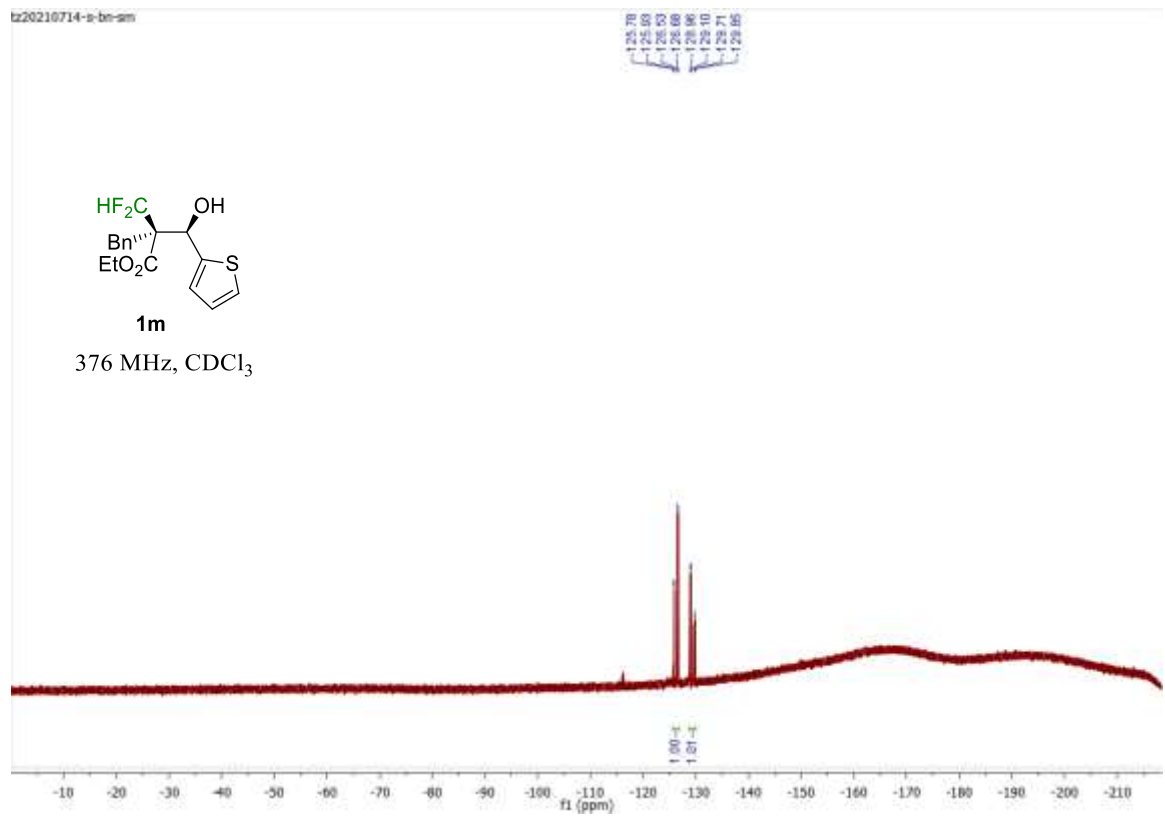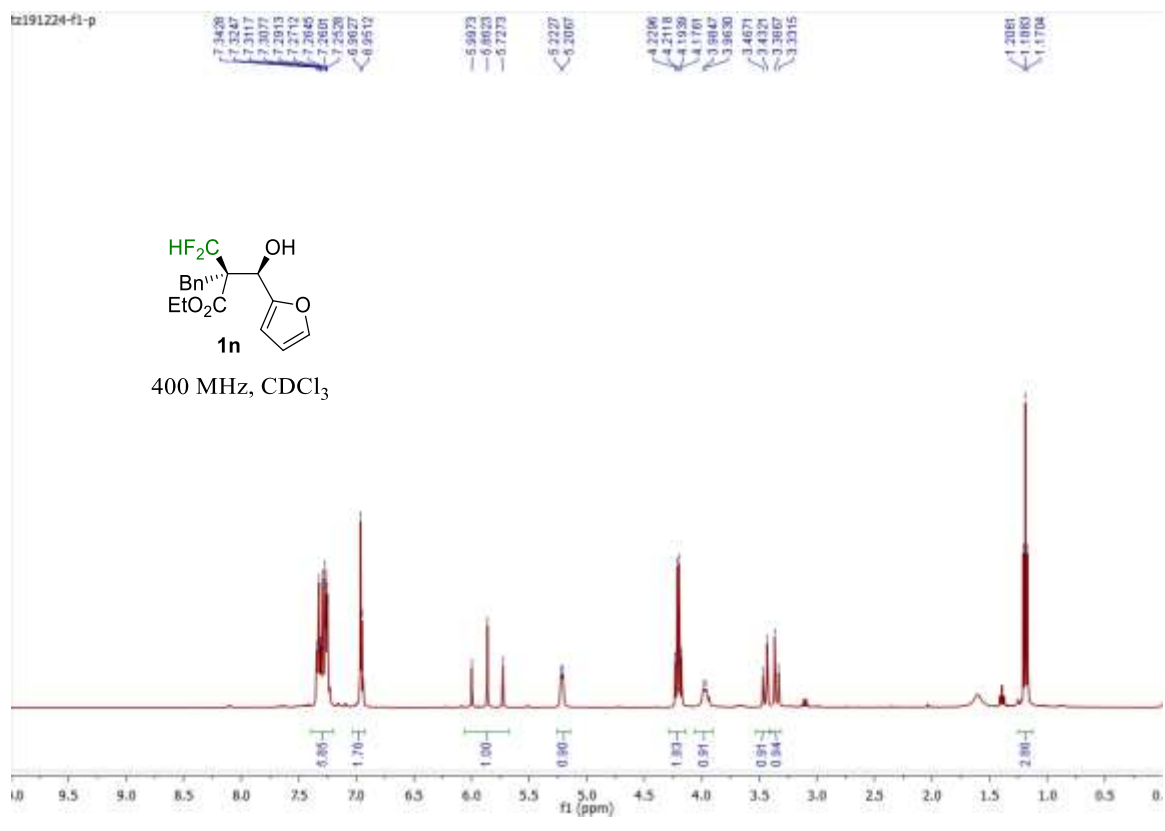



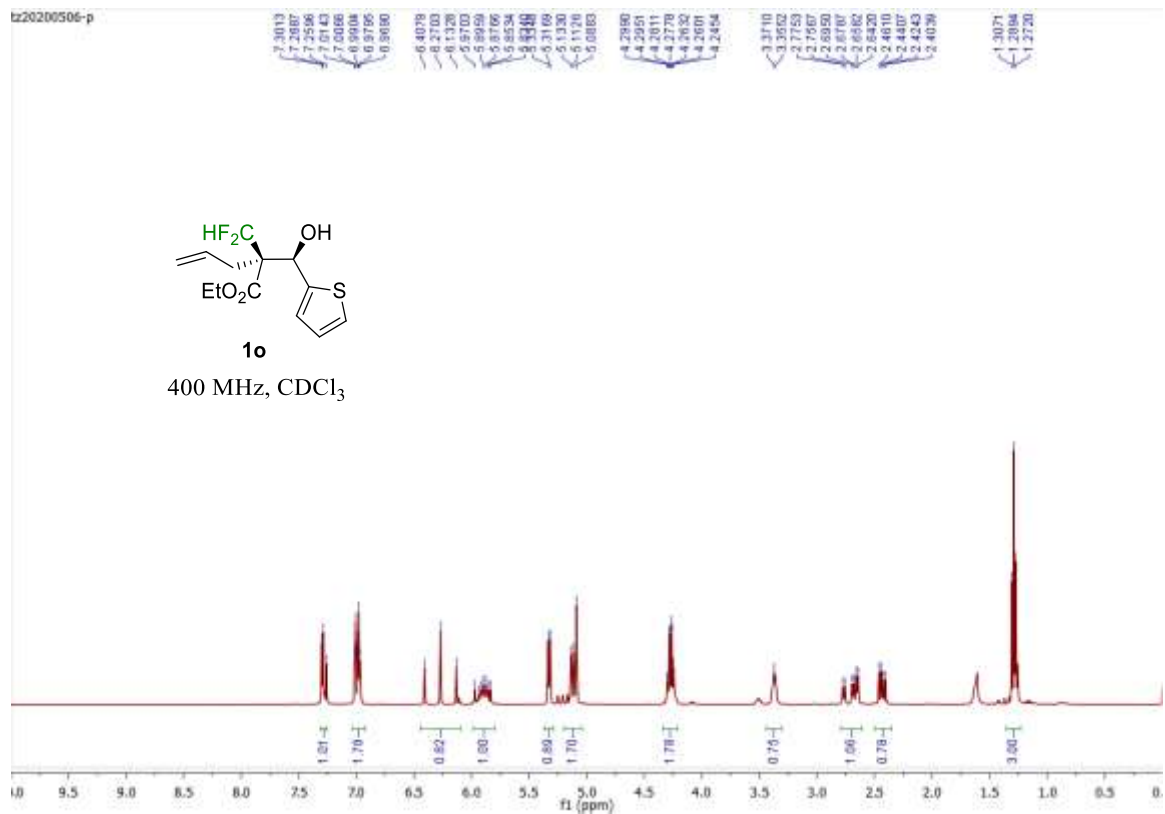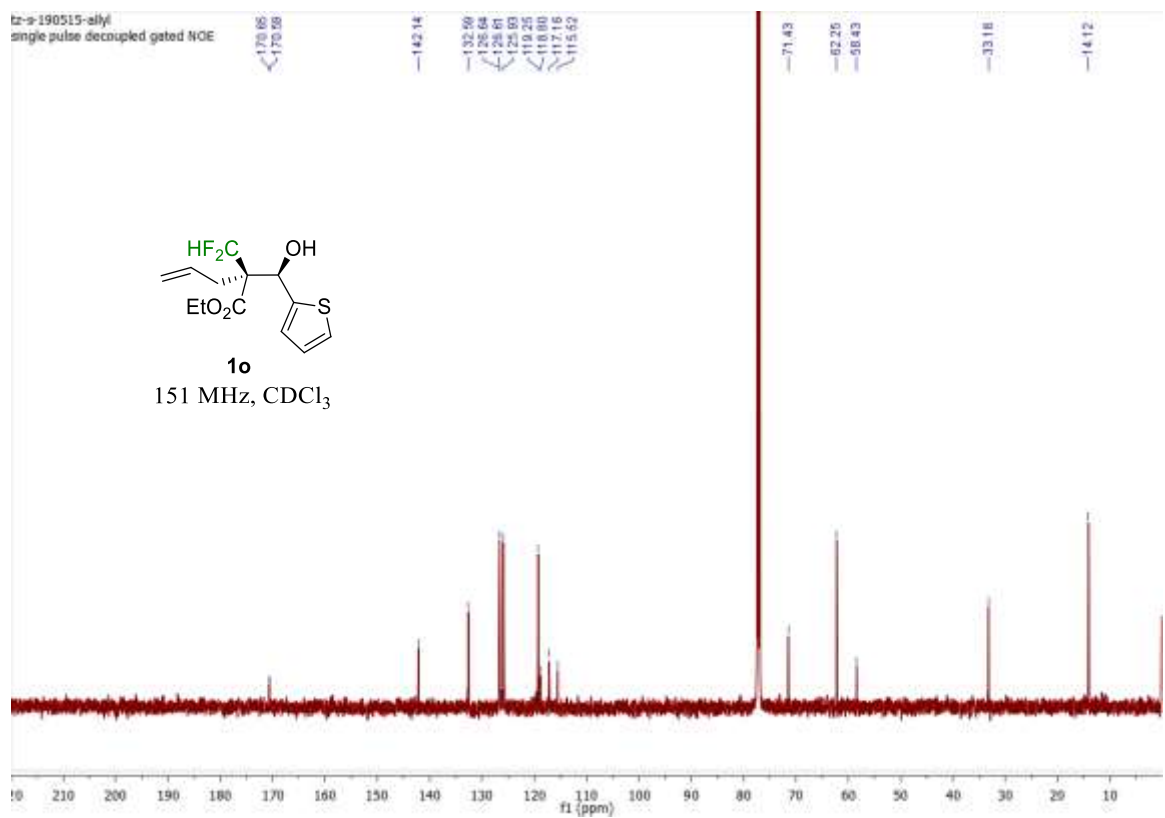

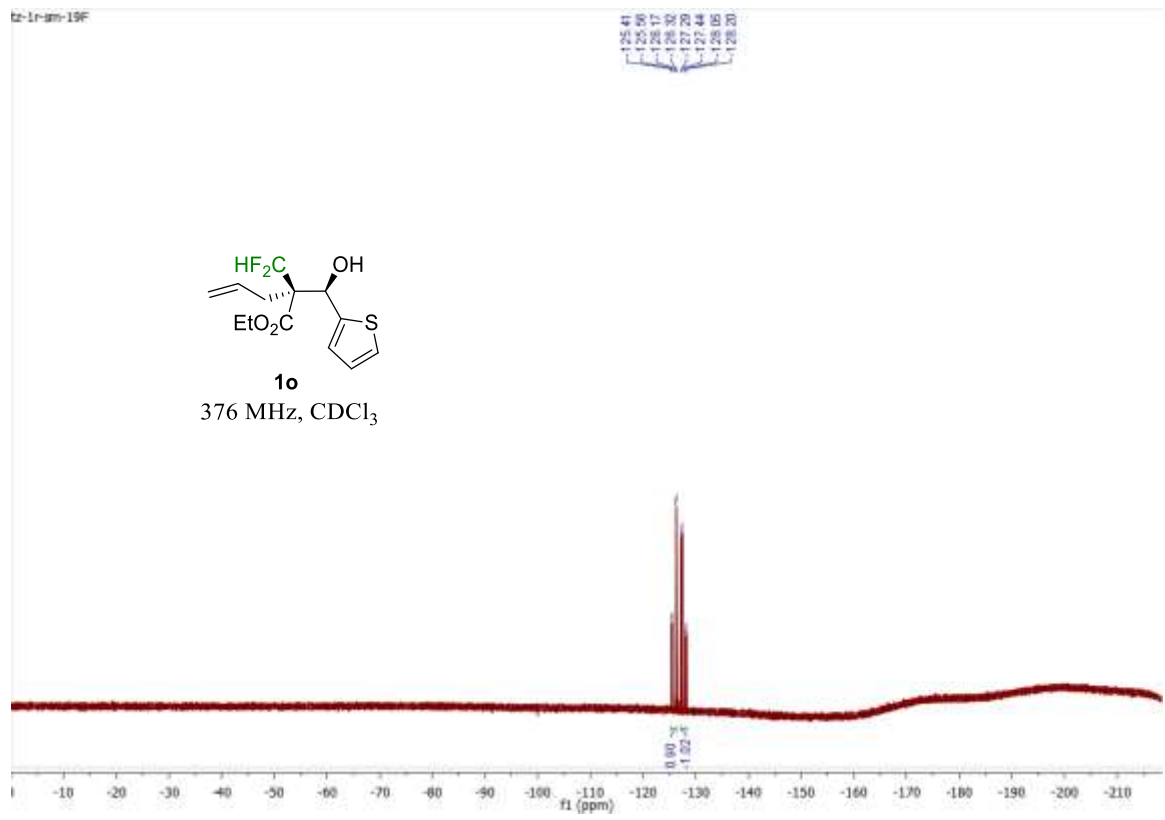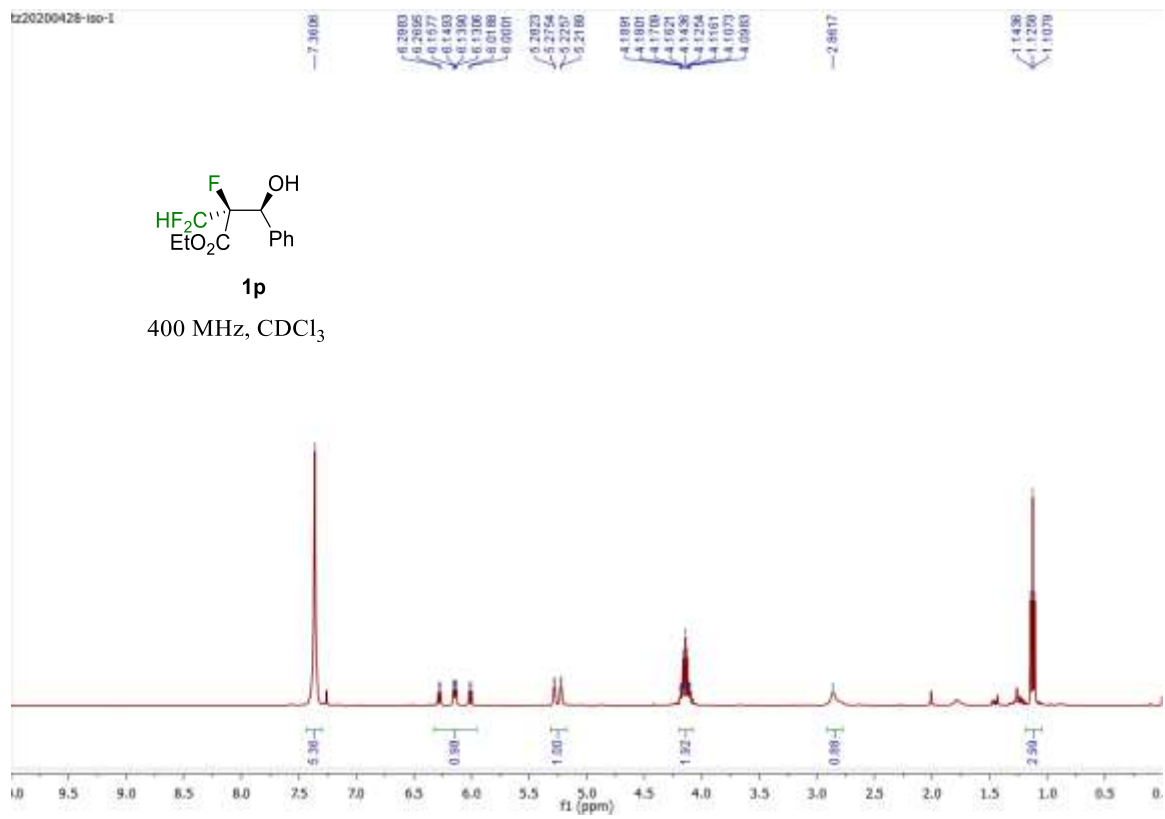



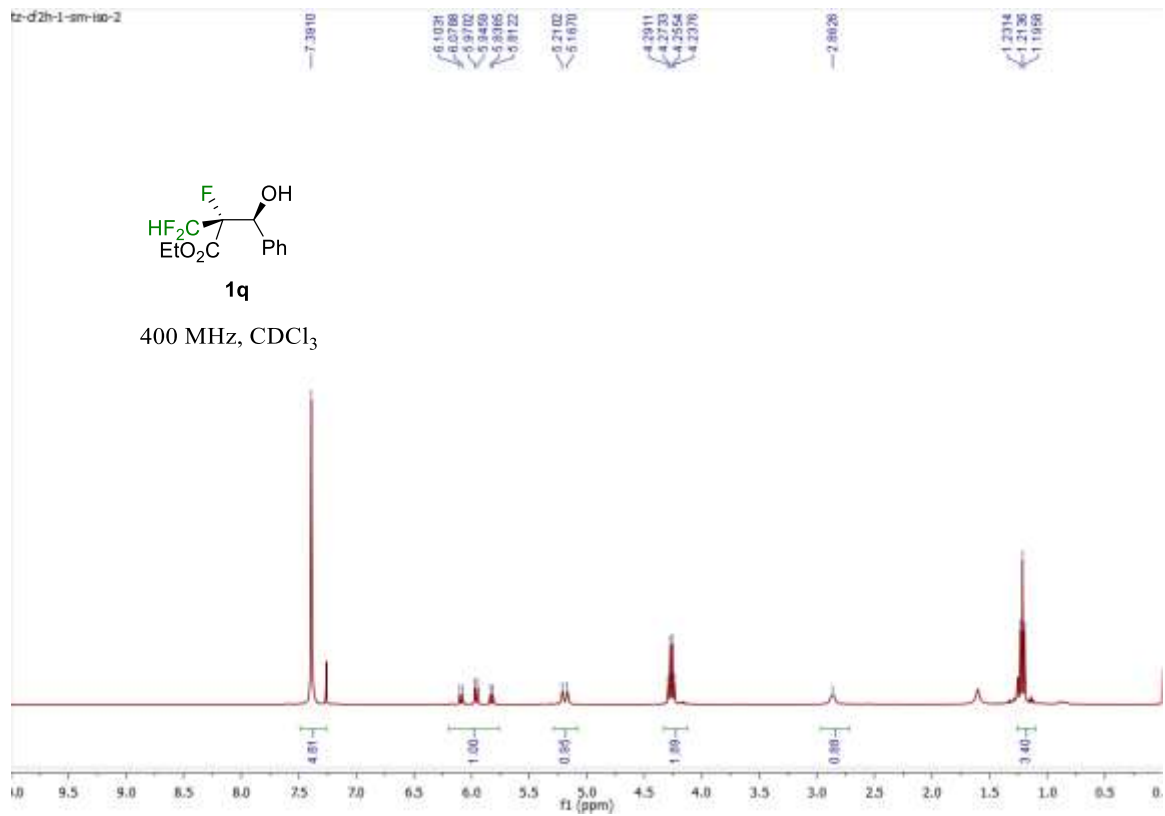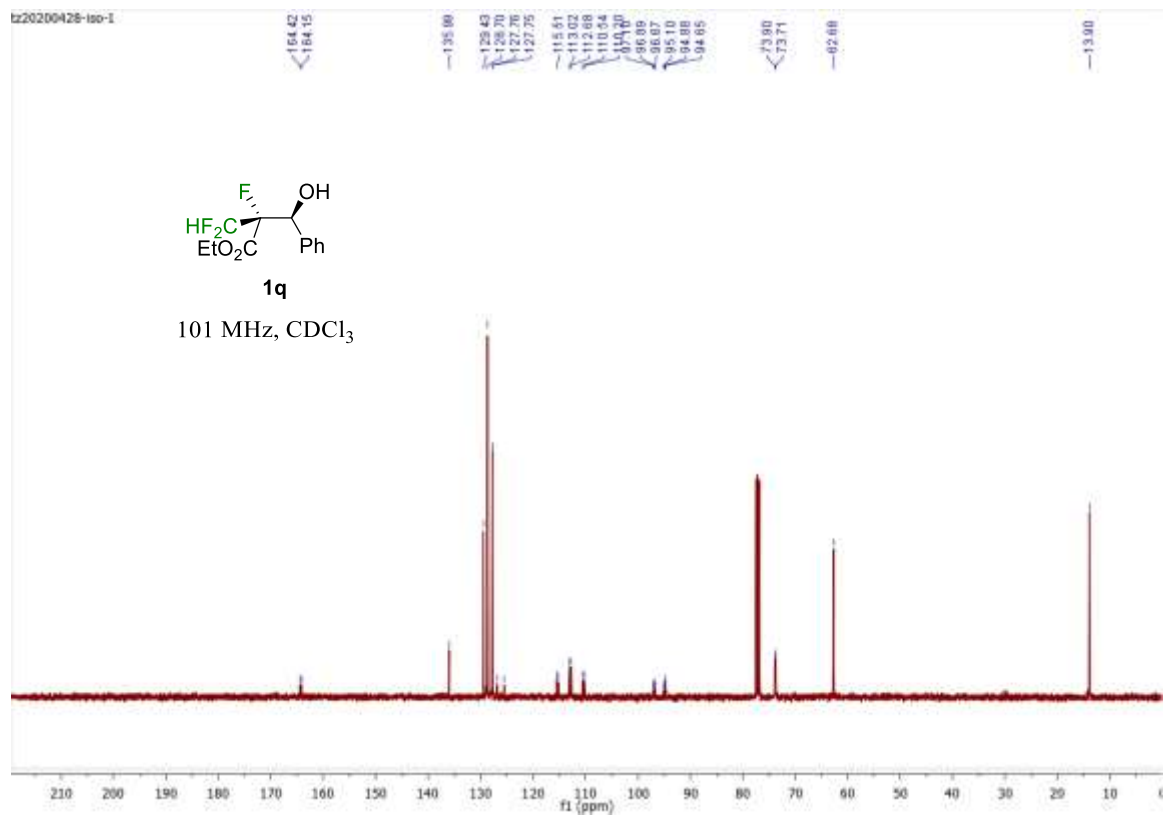

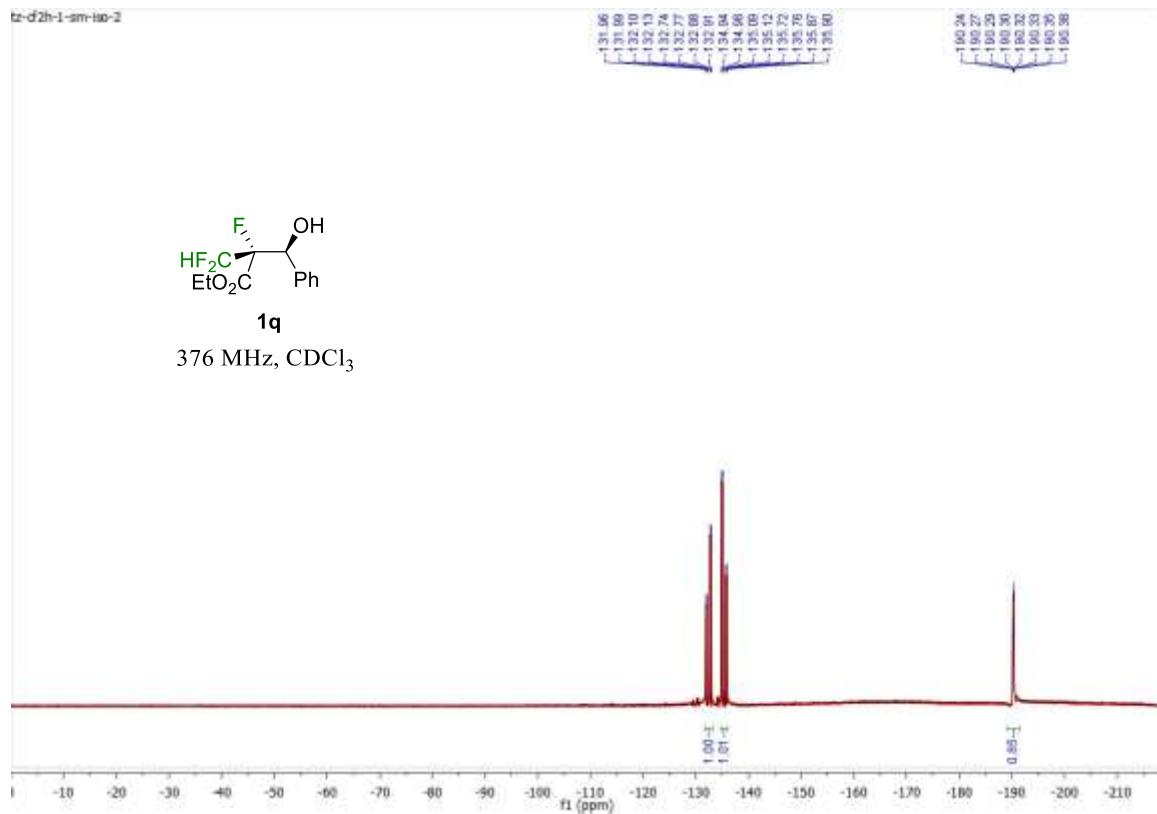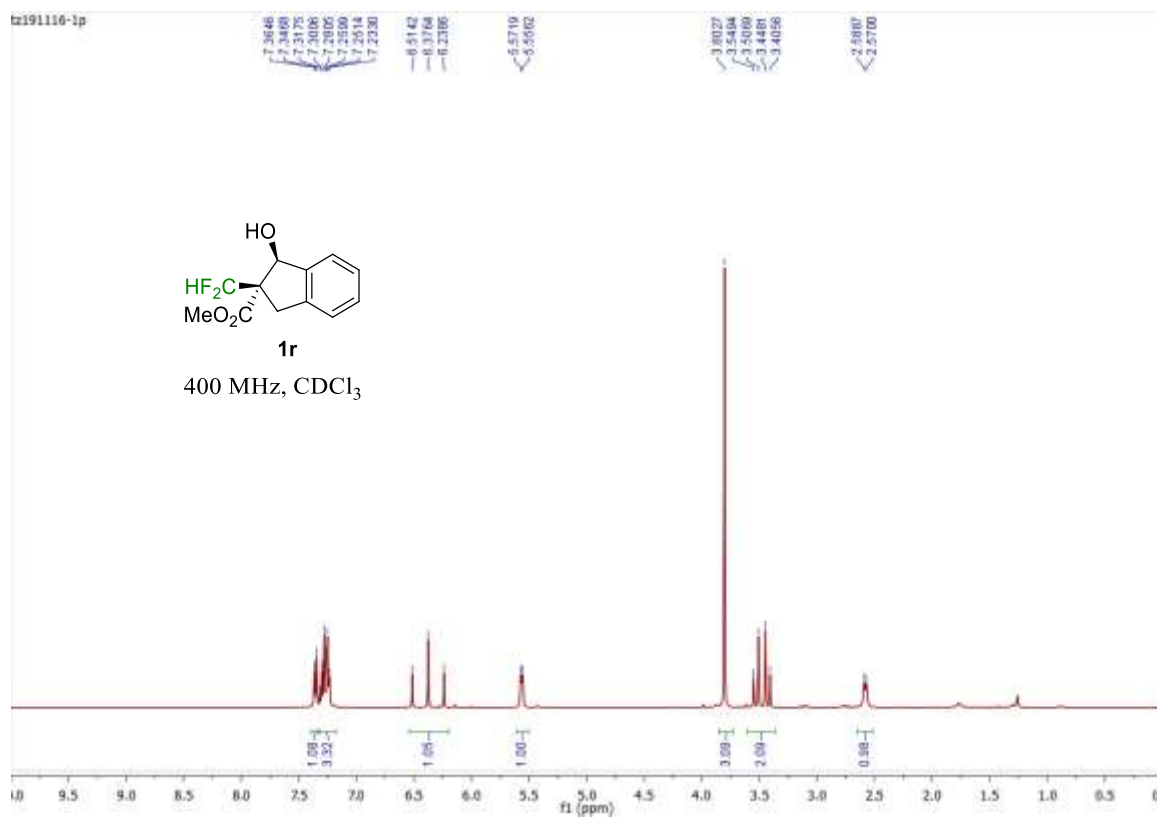





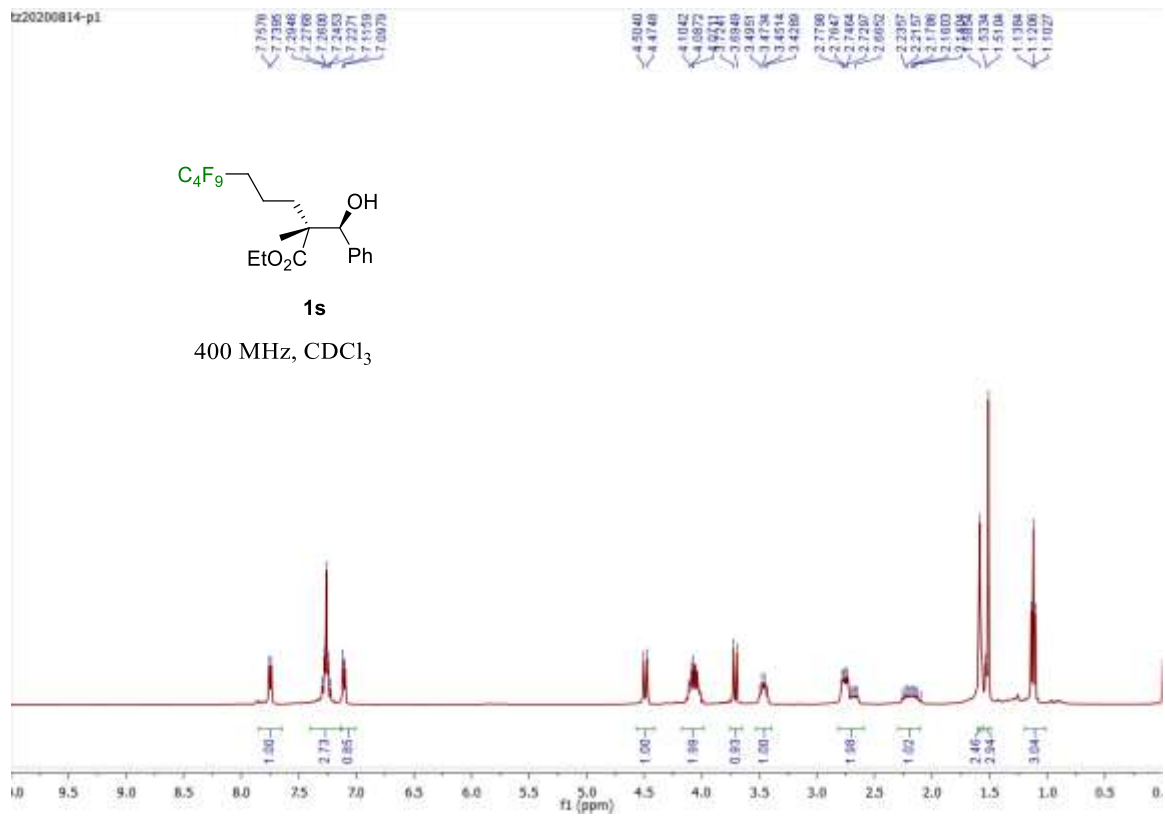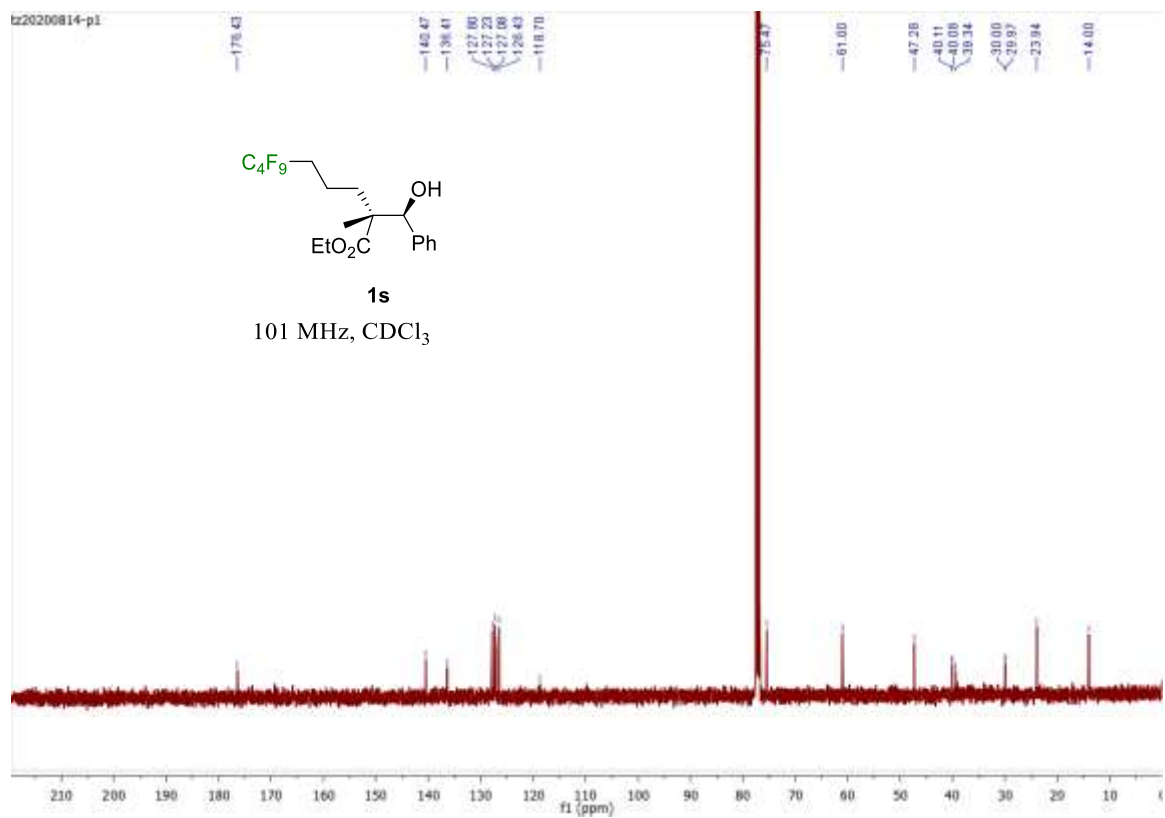

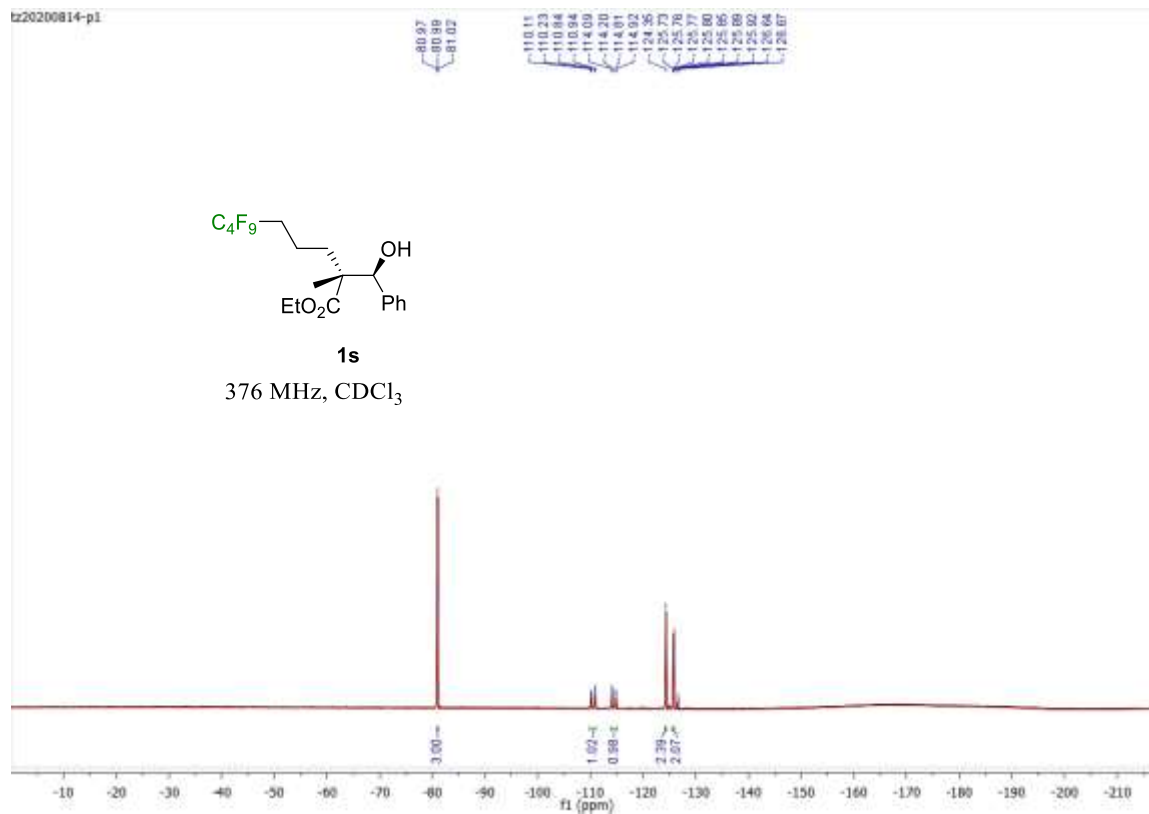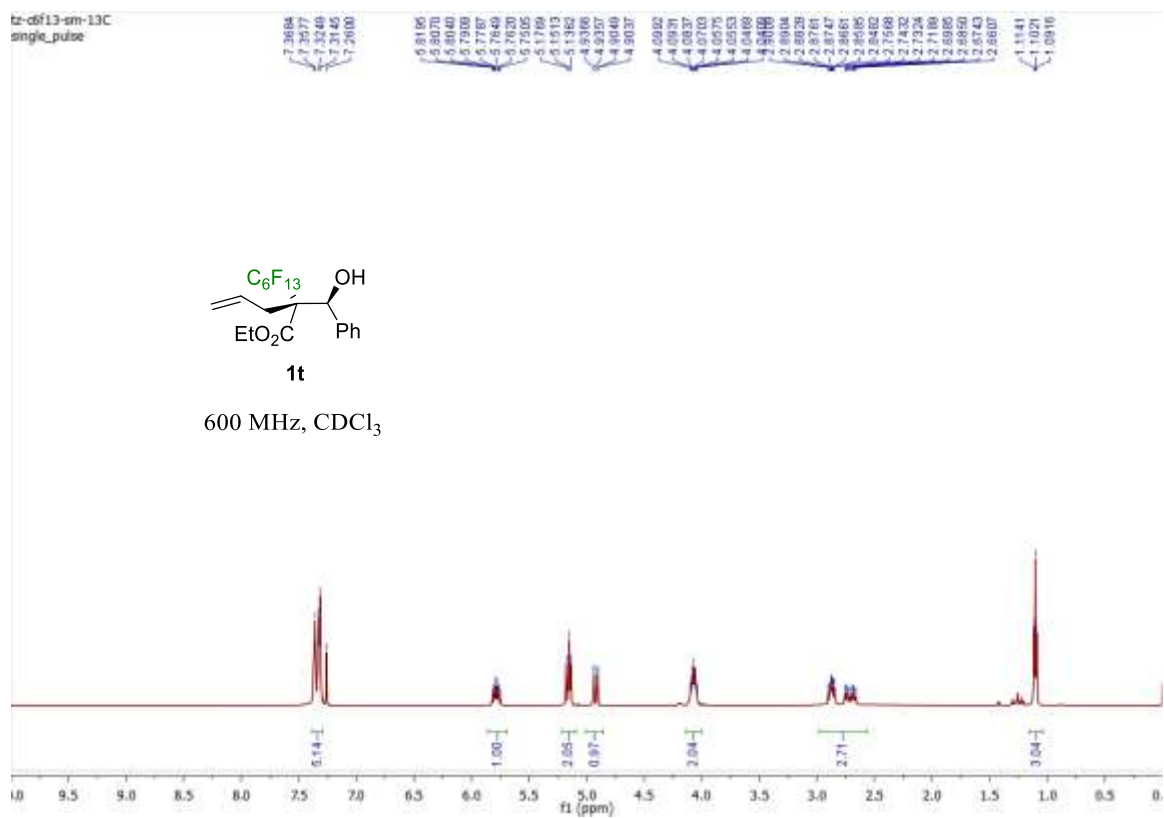

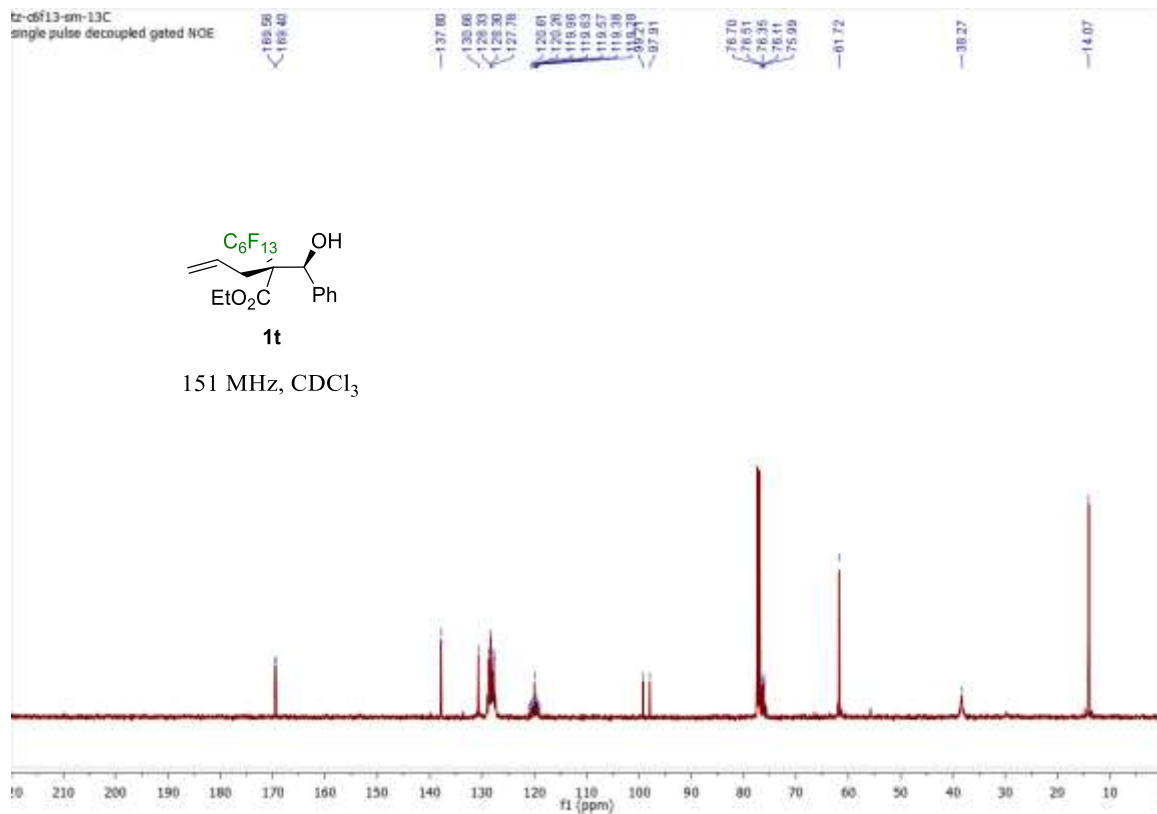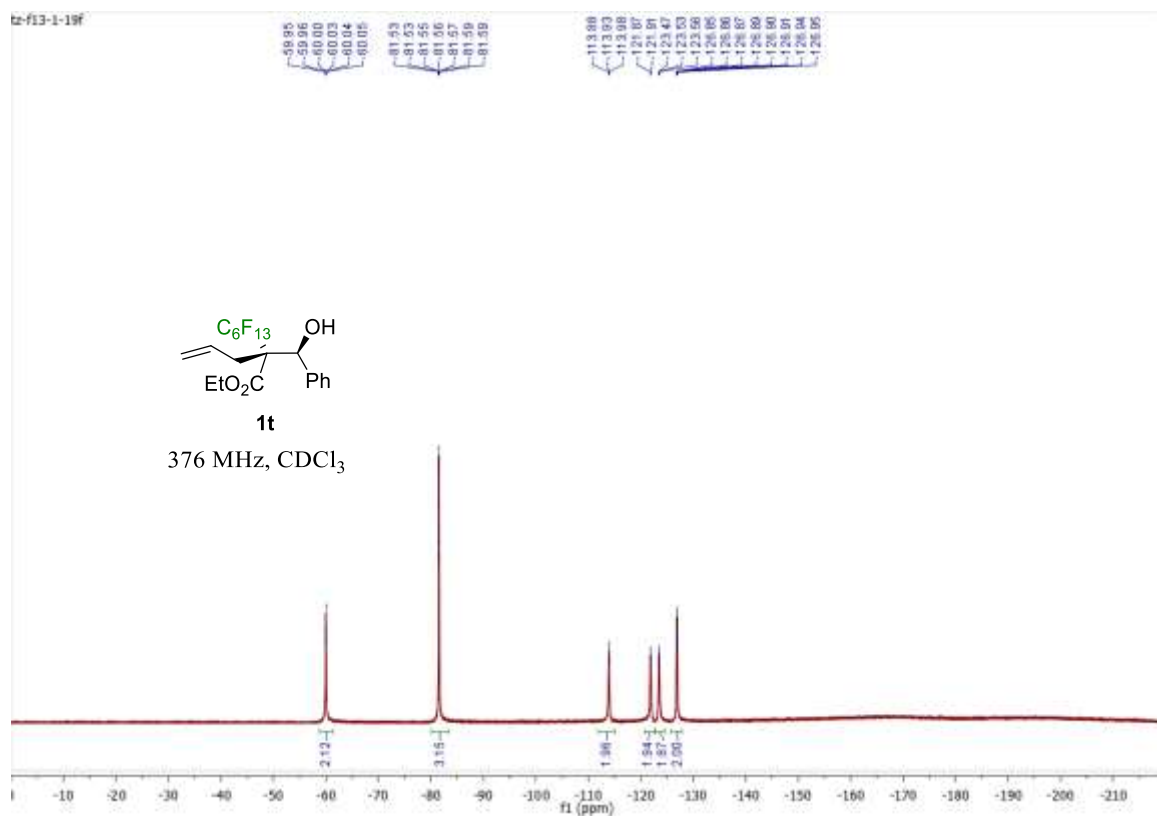

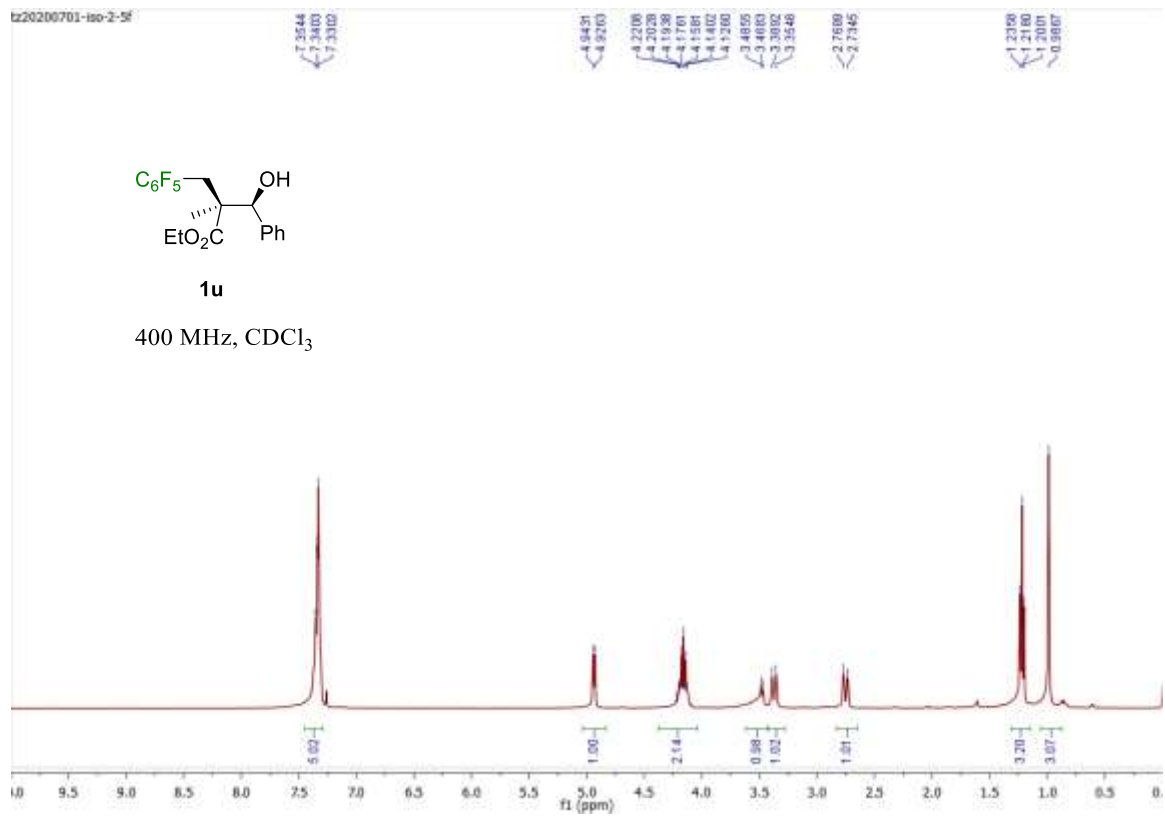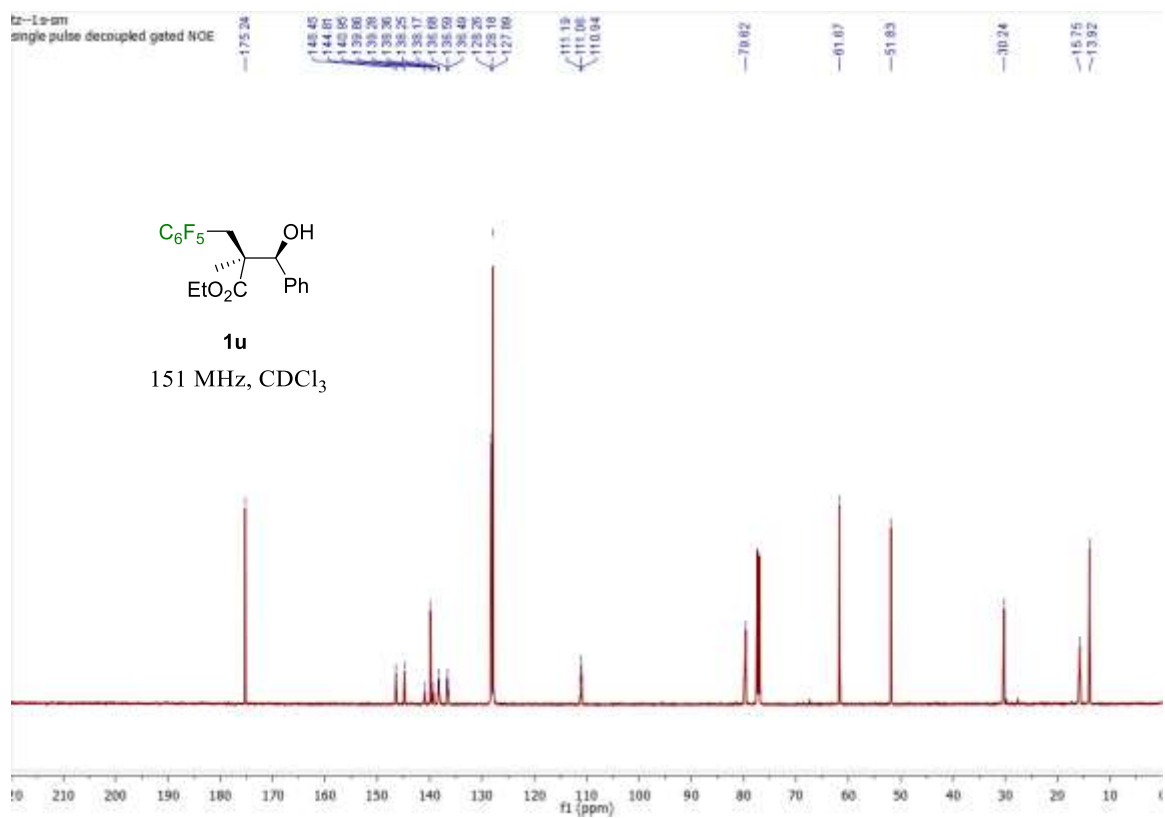

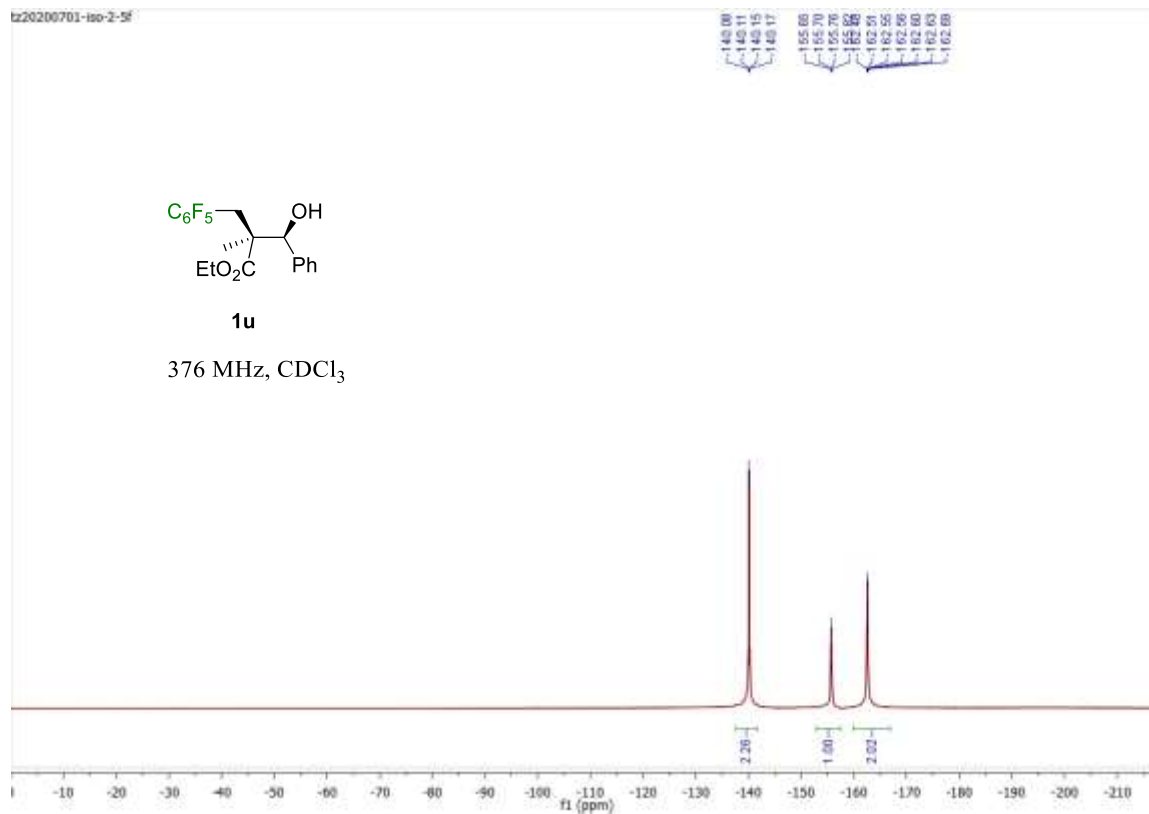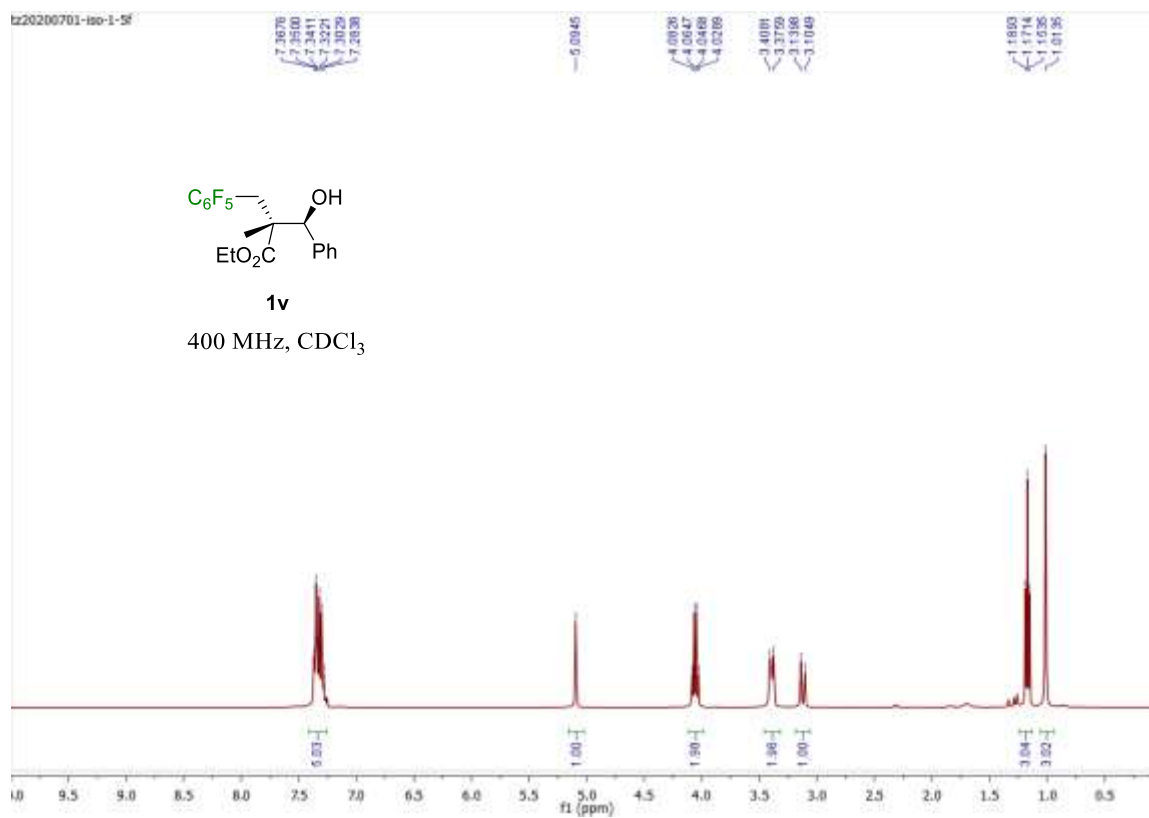



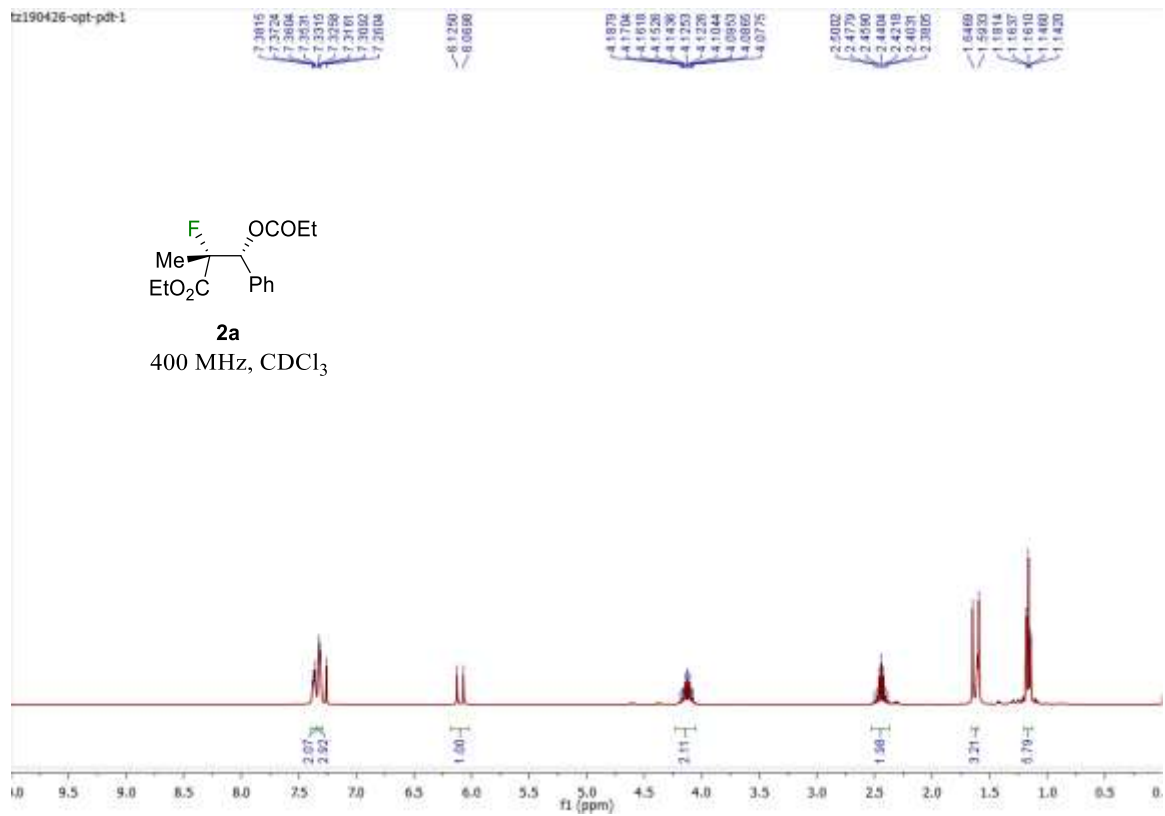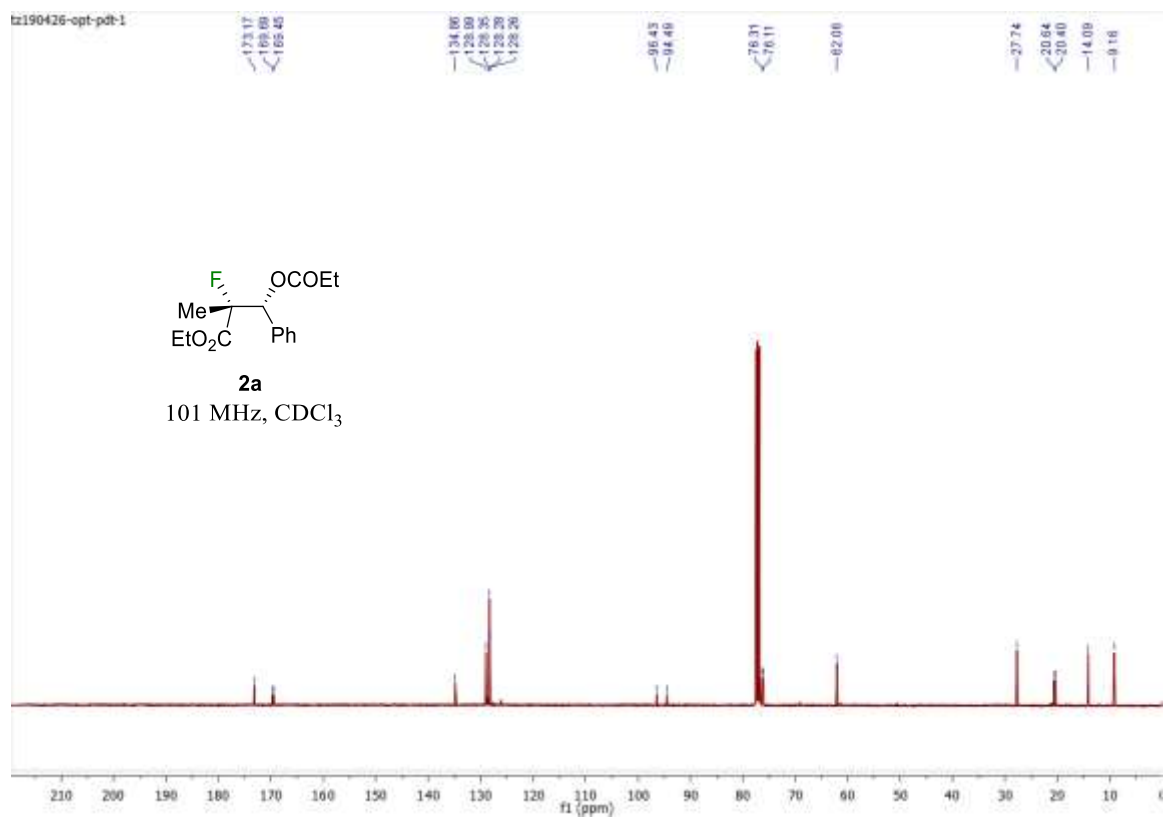



tz190426-opt-pdt-1

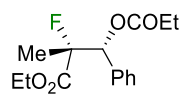

**2a**

376 MHz, CDCl<sub>3</sub>

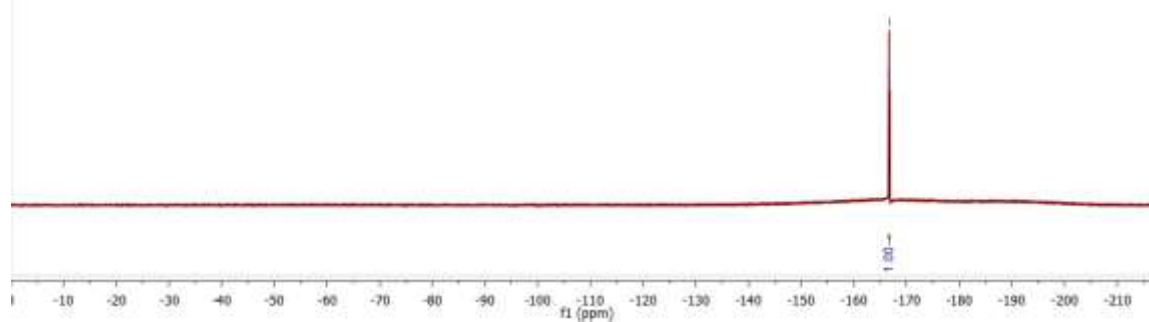

tz190511-1p

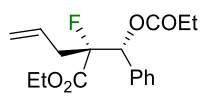

**2b**

400 MHz, CDCl<sub>3</sub>

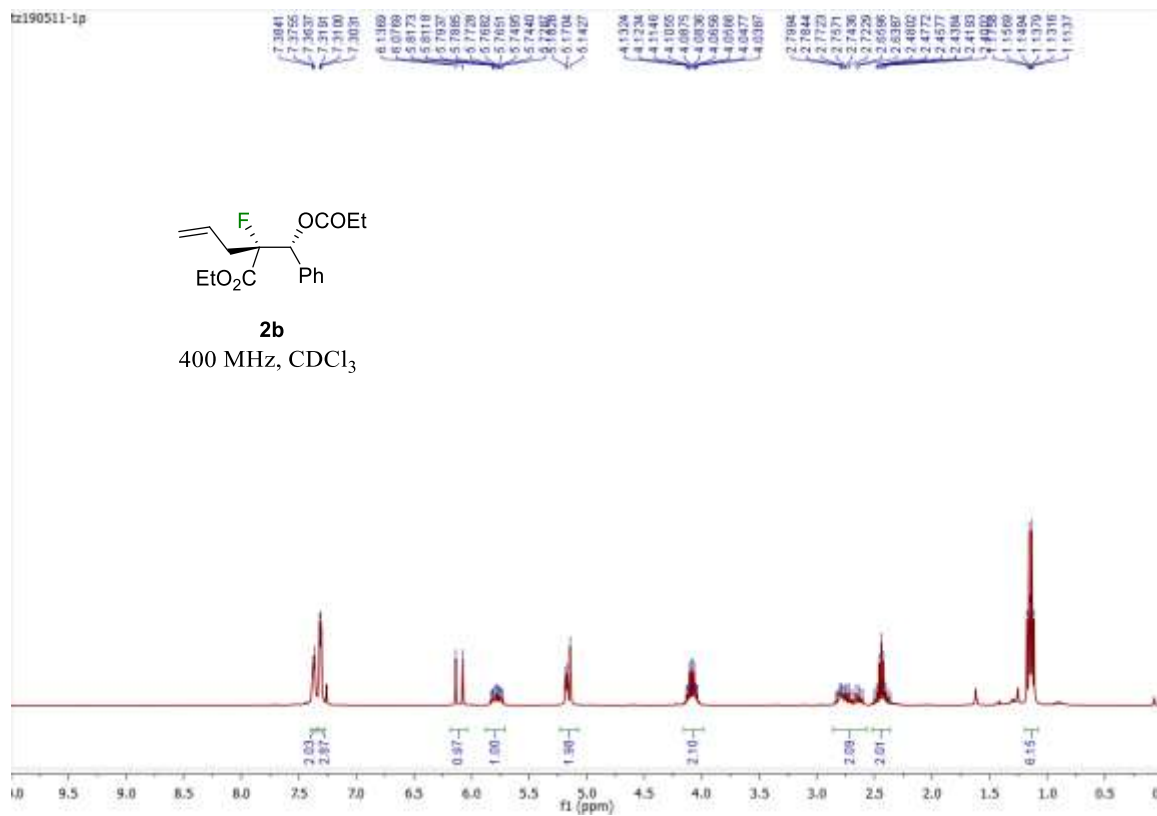

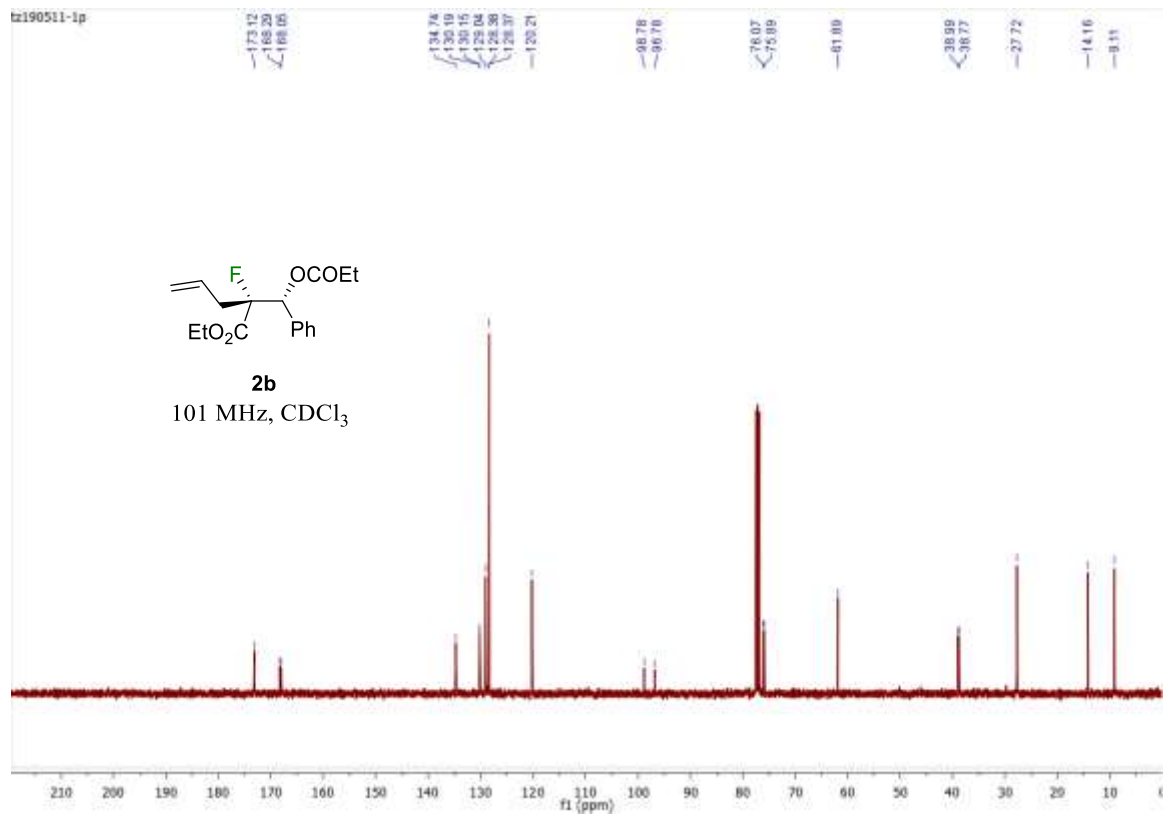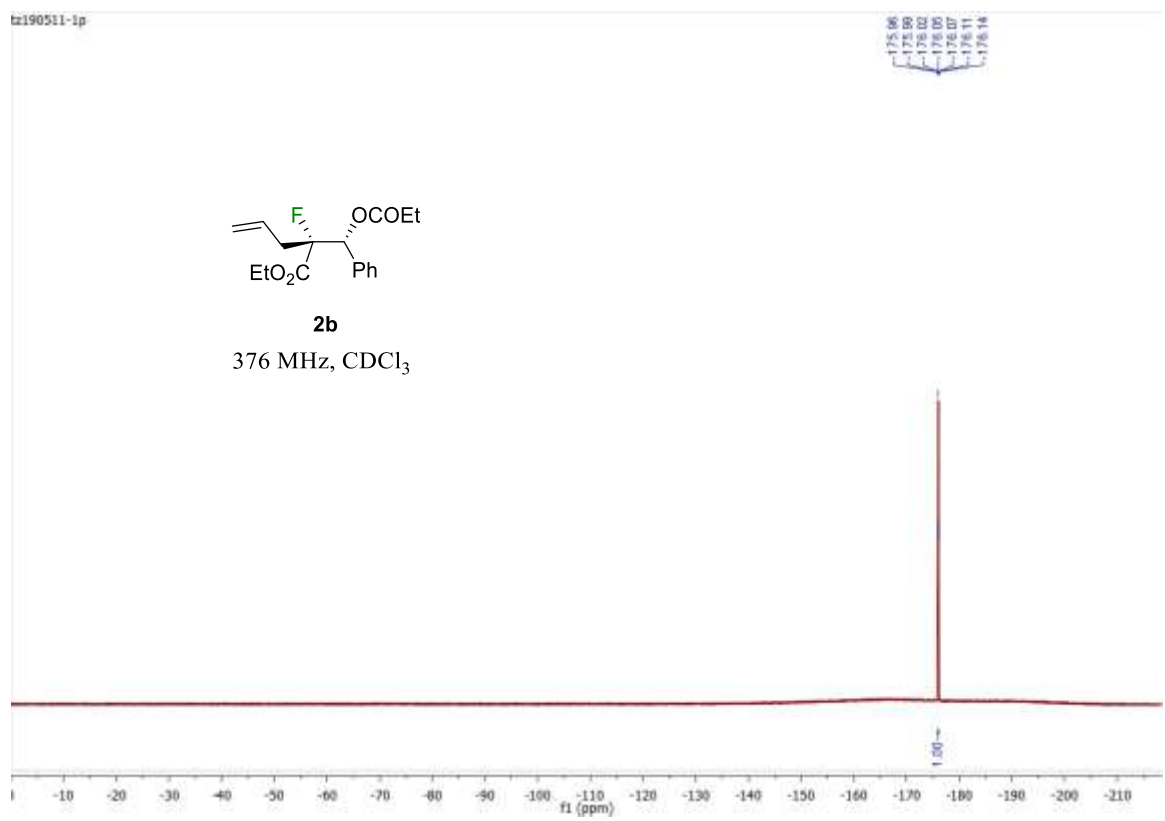

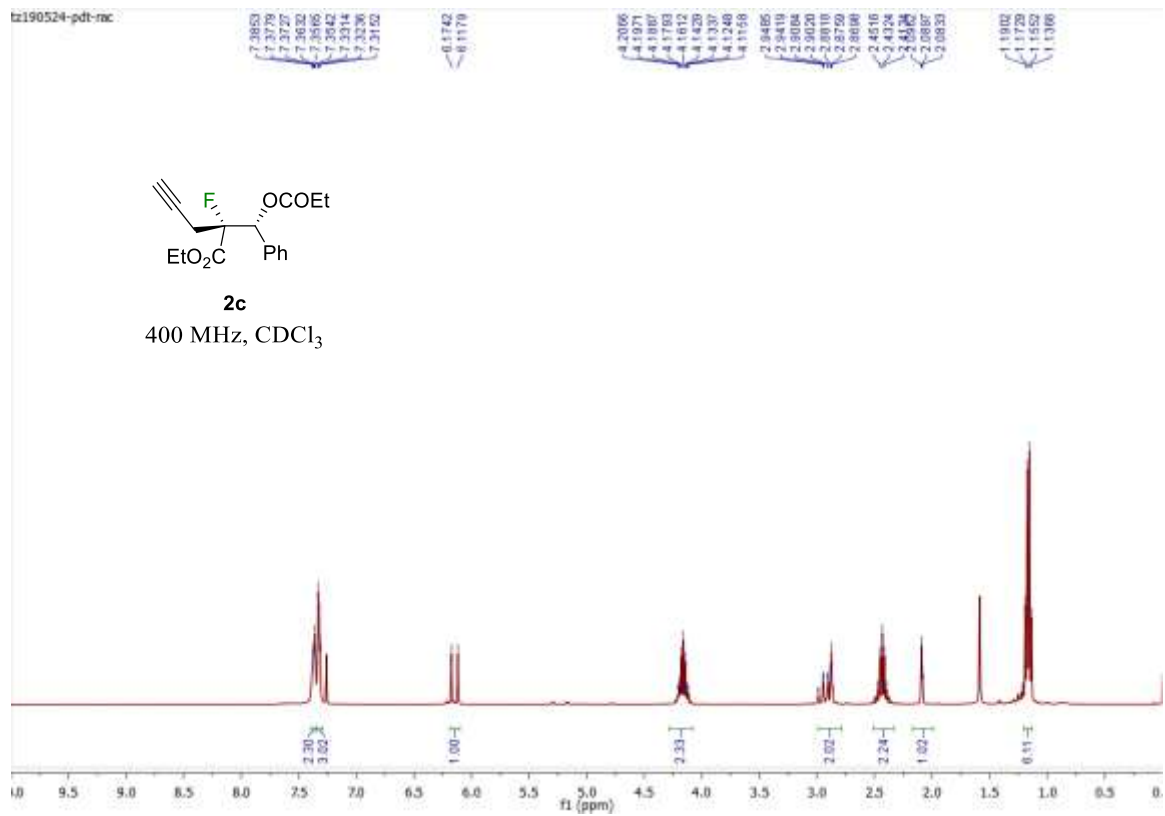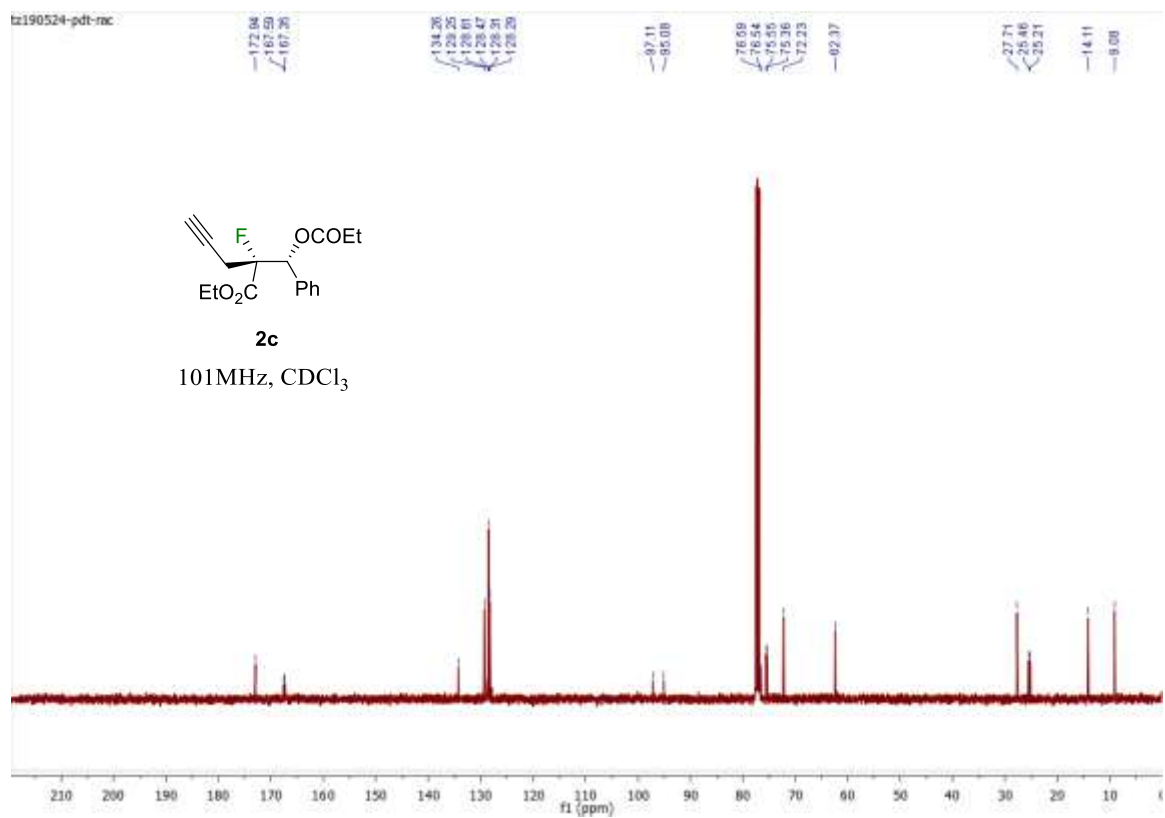

tz190524-pdt-rac

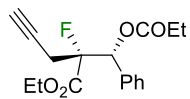

**2c**

376 MHz, CDCl<sub>3</sub>

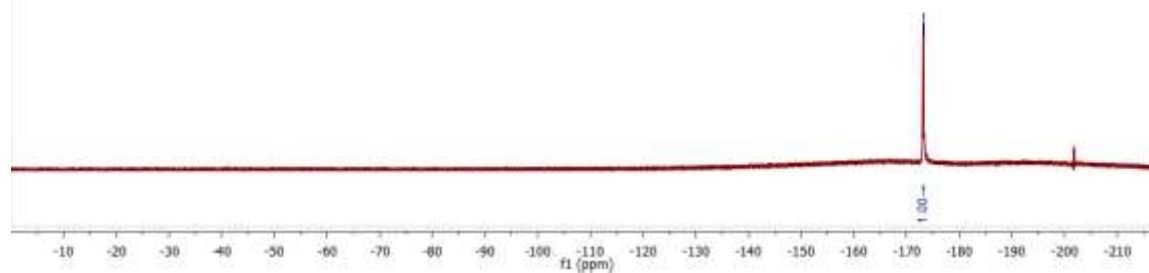

tz-2d-pdt-a

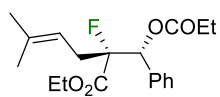

**2d**

400 MHz, CDCl<sub>3</sub>

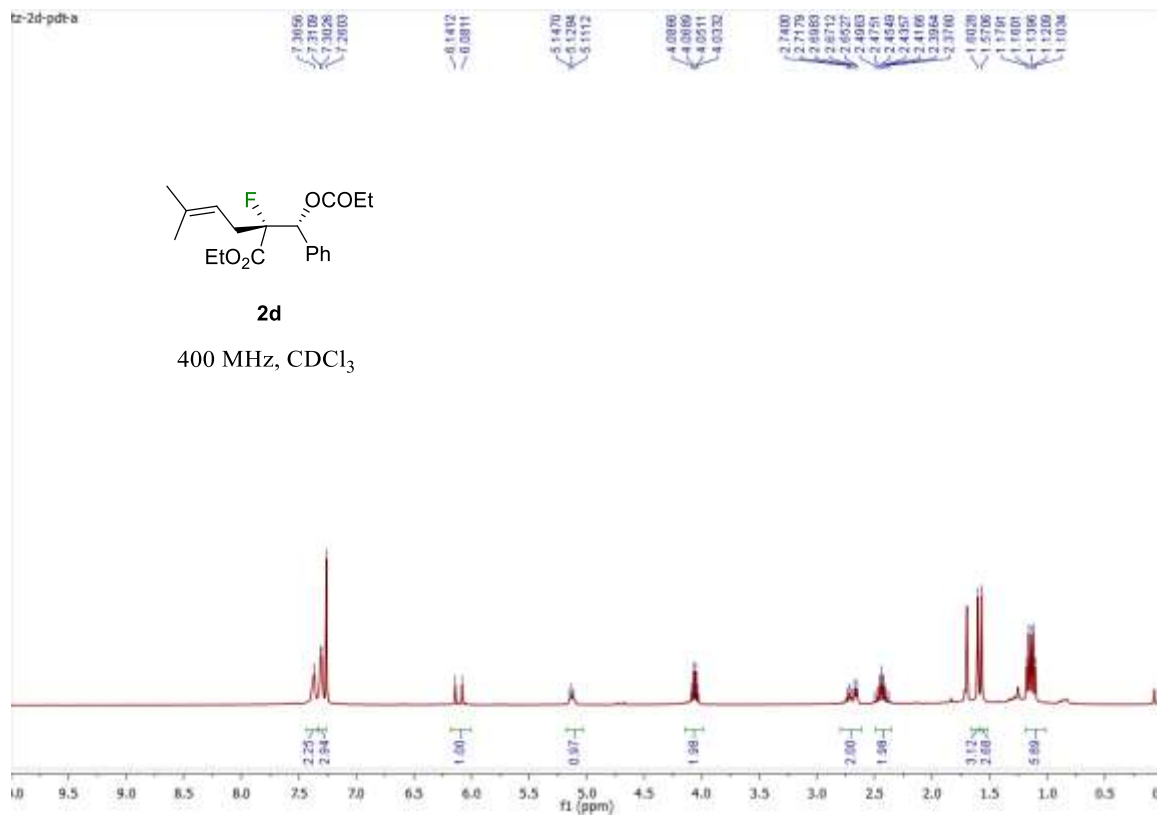

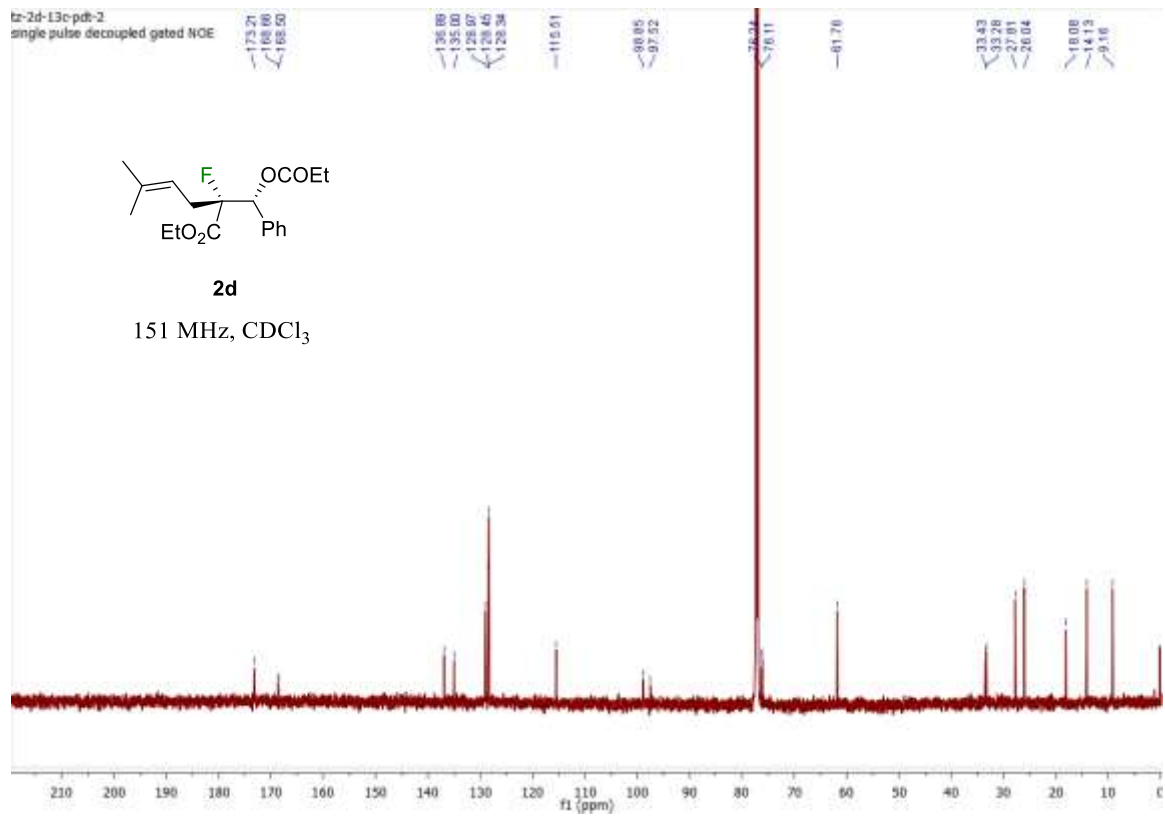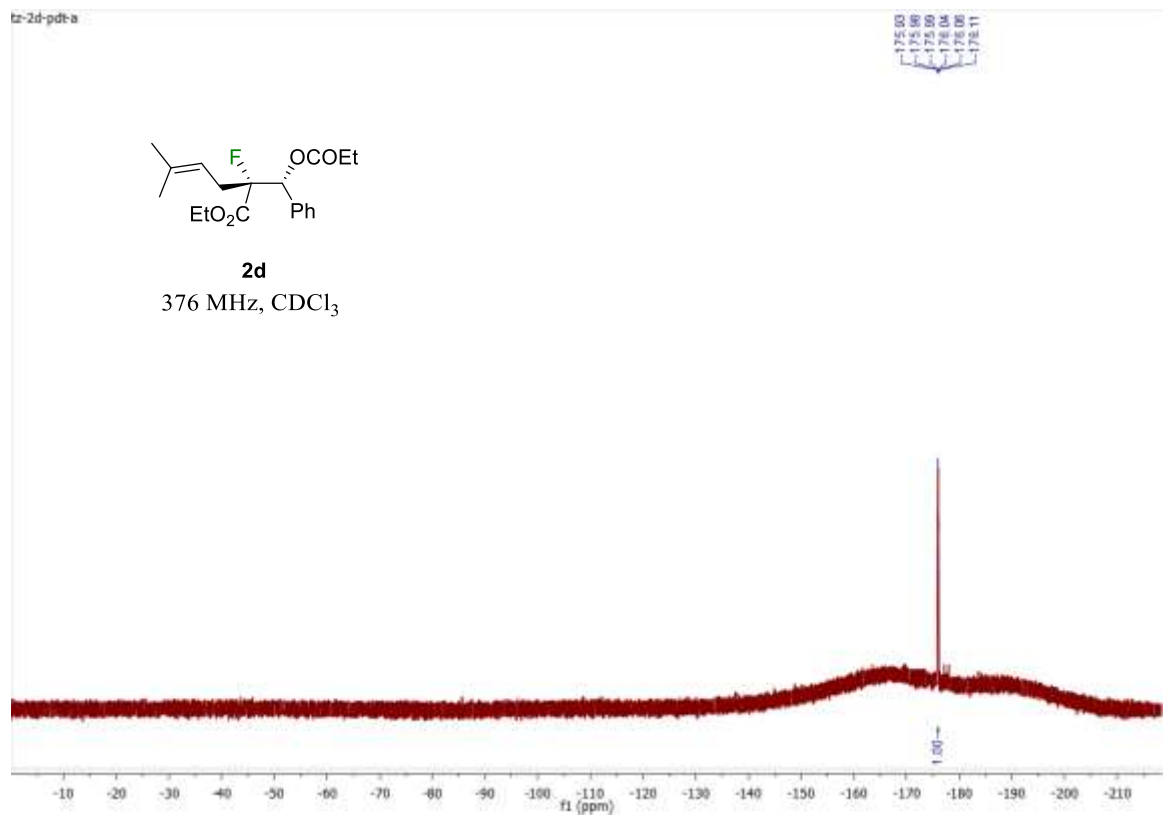

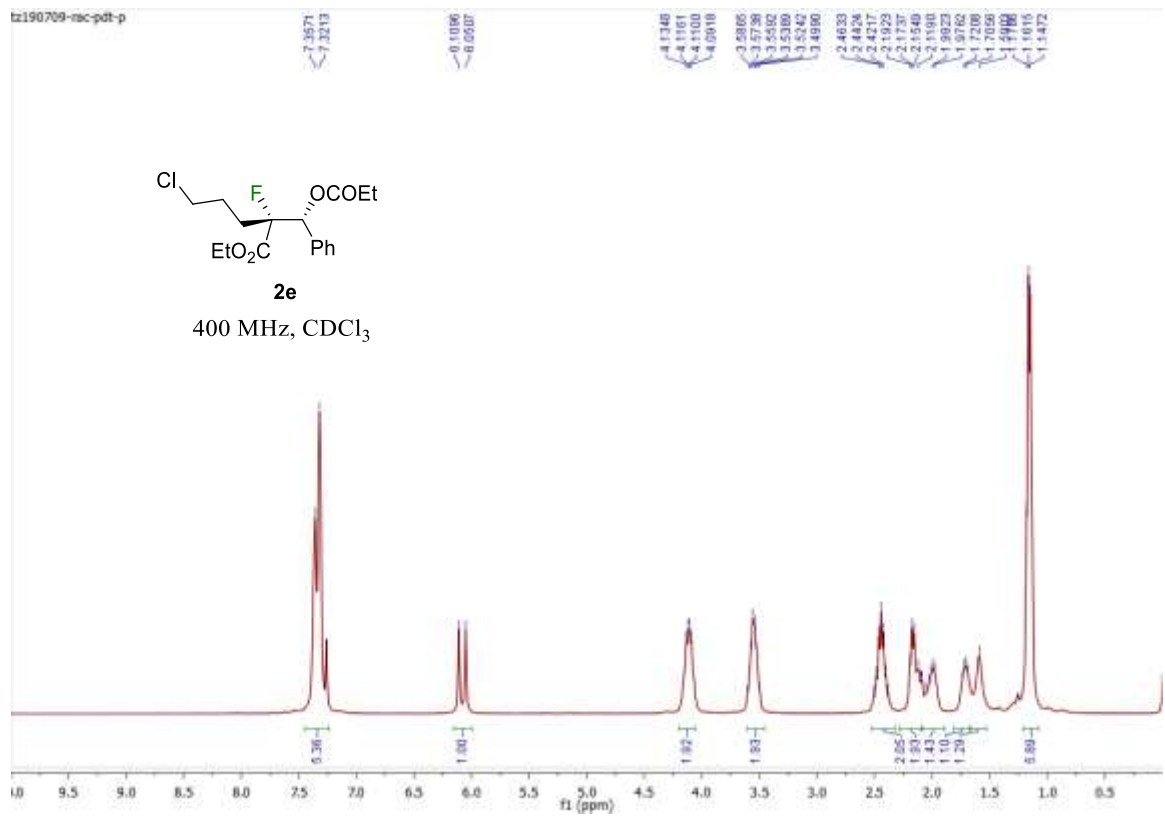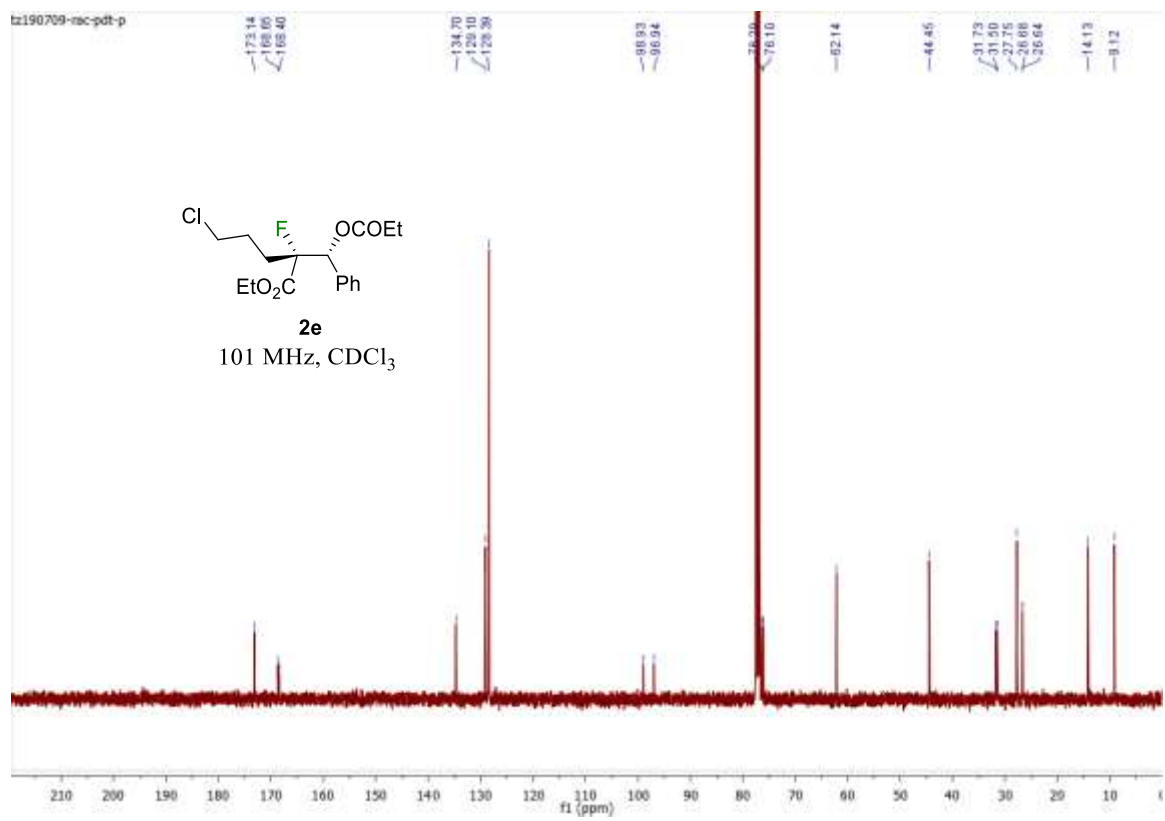

tz190709-rec-pdt-p

1776.21  
1775.28  
1774.33  
1773.39

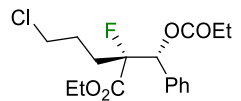

**2e**

376 MHz, CDCl<sub>3</sub>

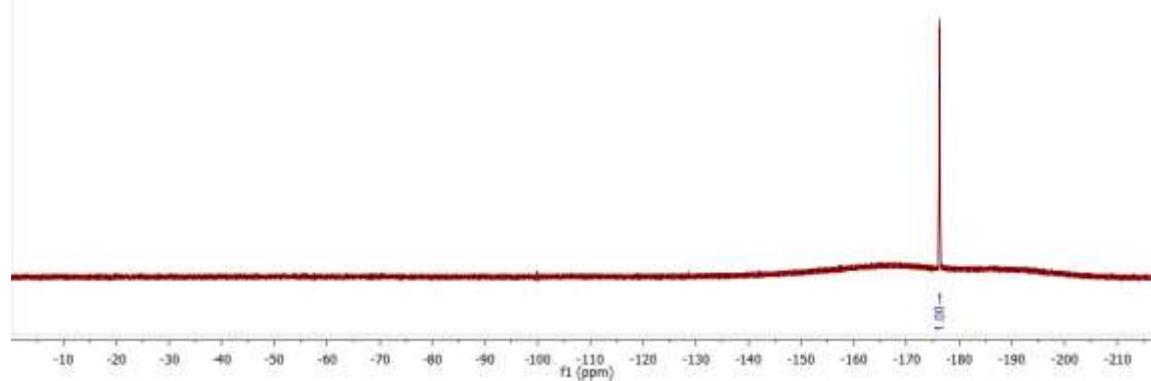

tz190620-pdt-CH3CN  
single\_pulse

7.3550  
7.3550  
7.3440  
7.3440  
7.3330  
7.3330  
7.3267  
7.3267

6.0186  
6.0126

4.1427  
4.1412  
4.1356  
4.1260  
4.1239  
4.1174  
4.1121  
4.1056  
4.1002  
3.6843

3.2027  
3.1752  
3.1545  
3.0086  
2.9953  
2.9814

2.4868  
2.4741  
2.4717  
2.4589  
2.4463  
2.4336  
2.4210  
2.4084  
1.9980  
1.9980  
1.1575  
1.1449  
1.1314  
1.1185  
1.1076

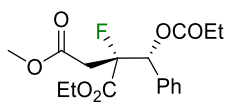

**2f**

600 MHz, CDCl<sub>3</sub>

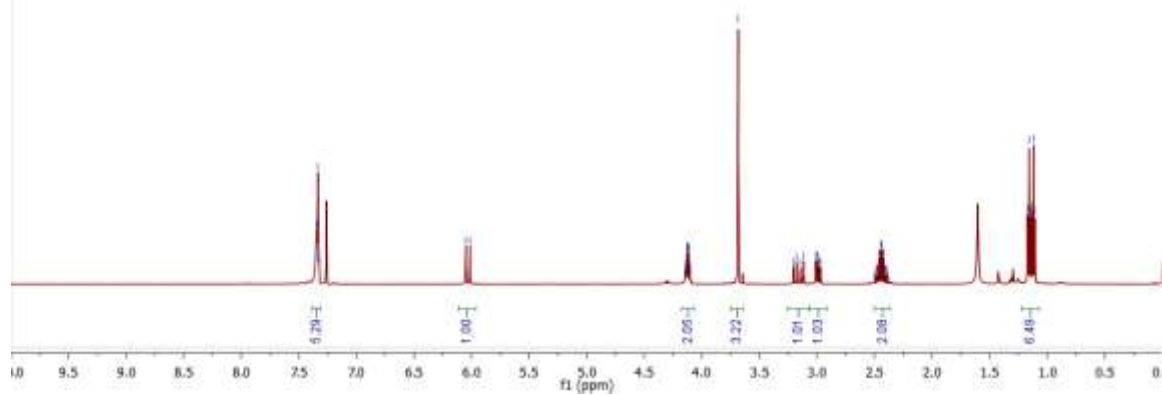

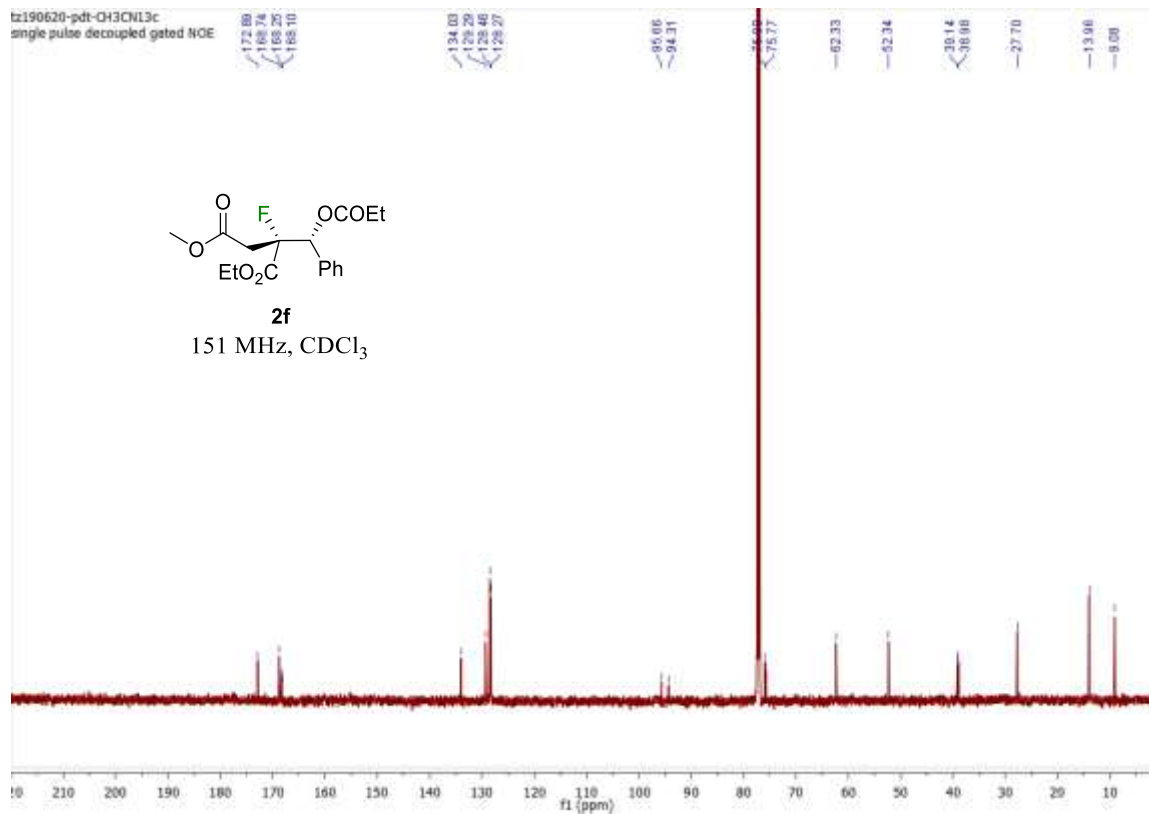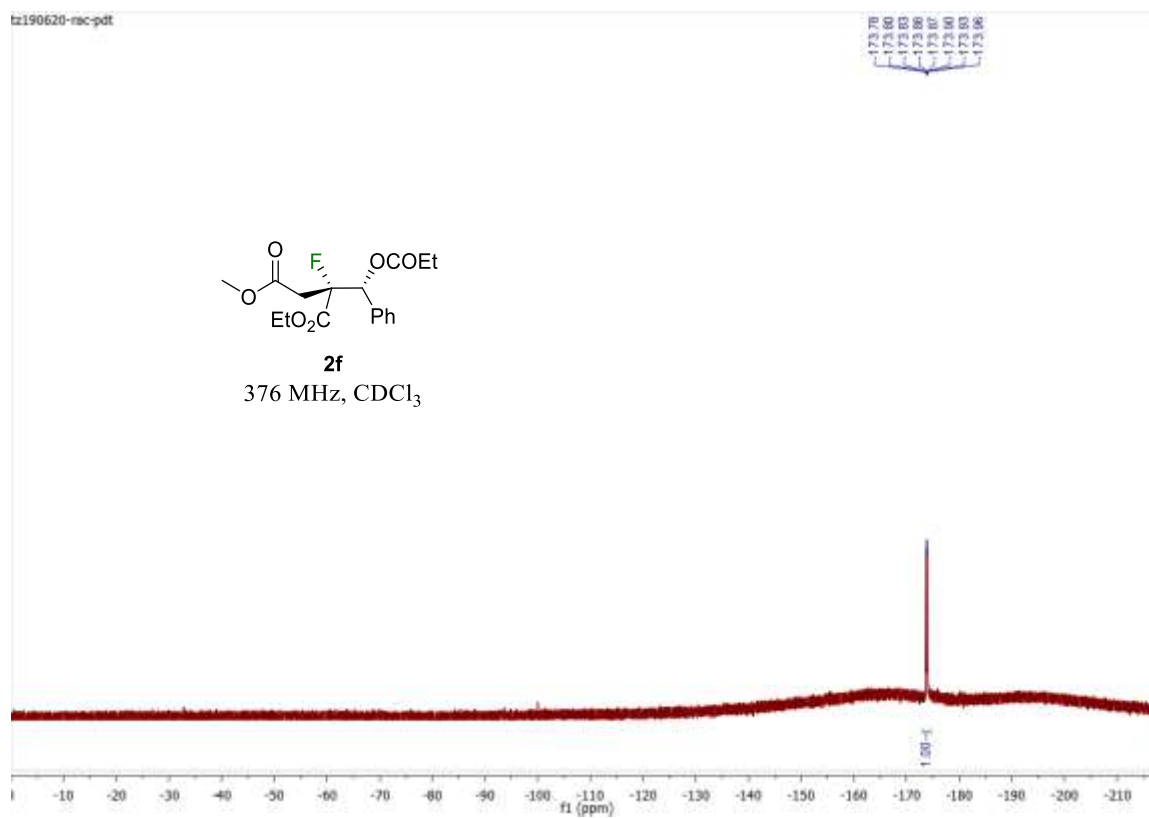



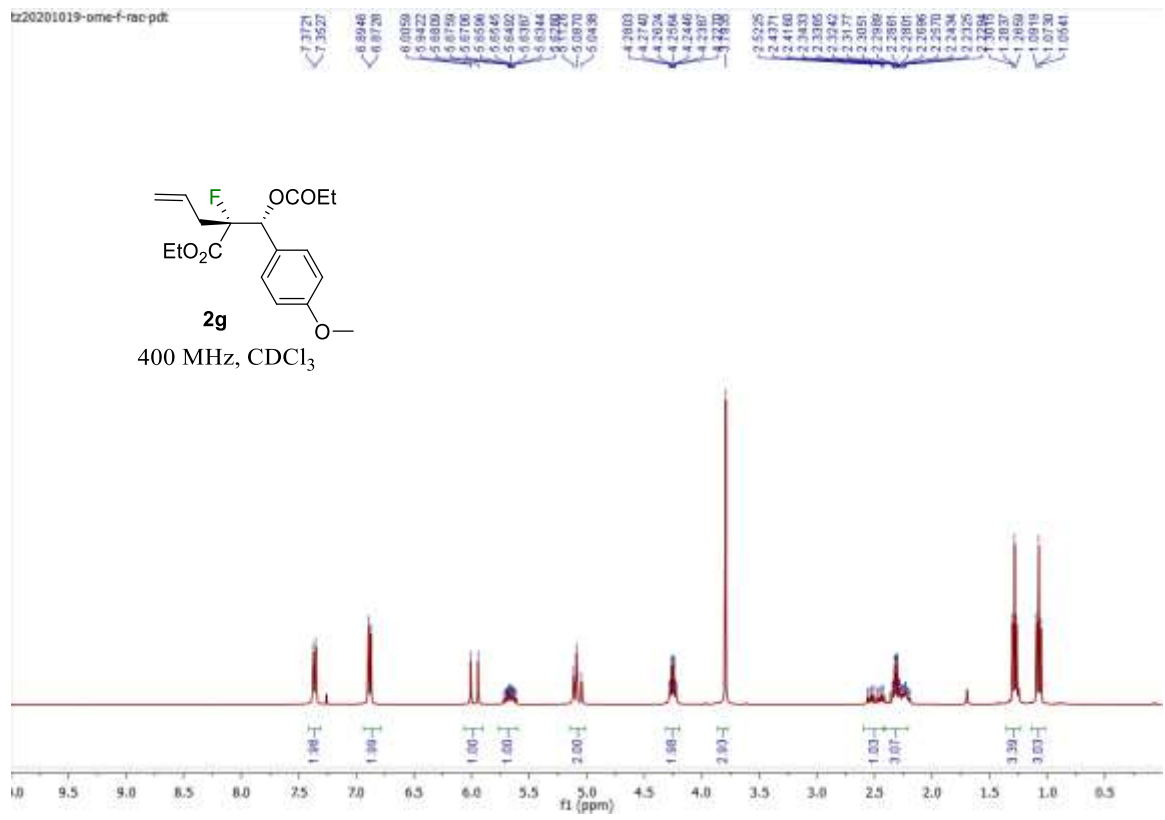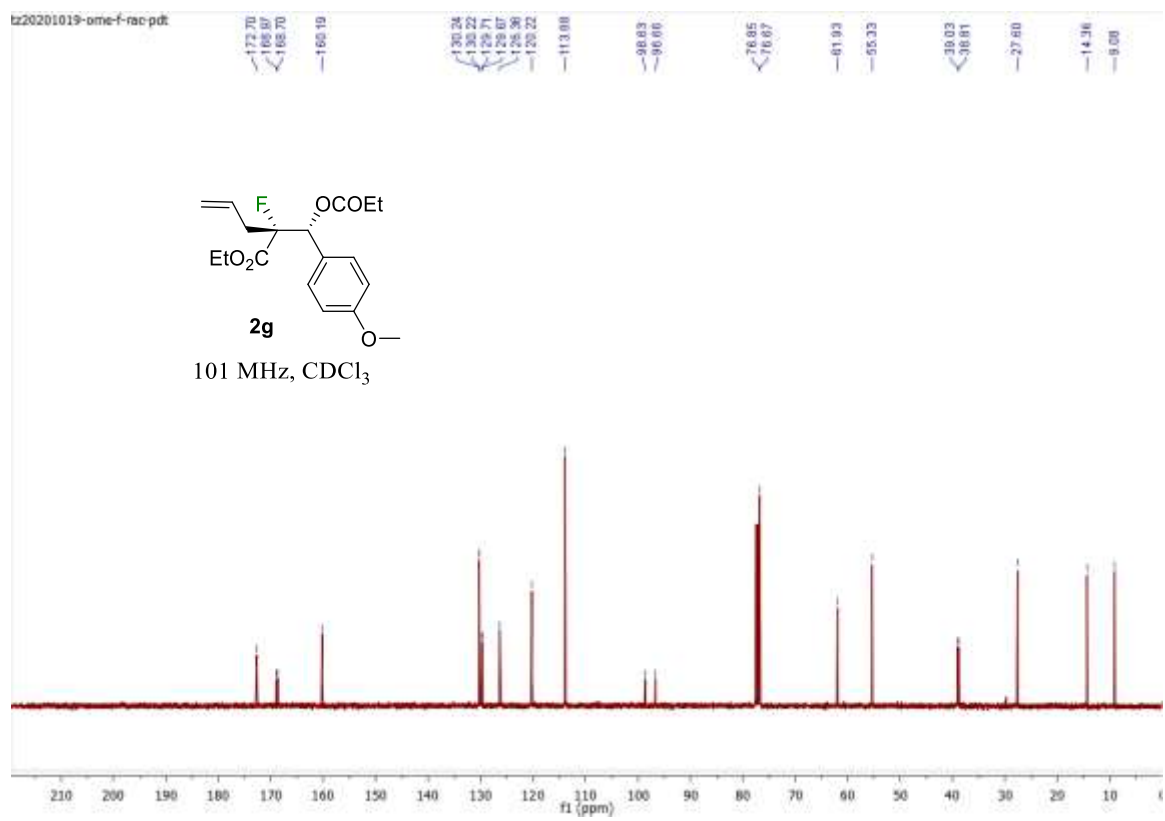



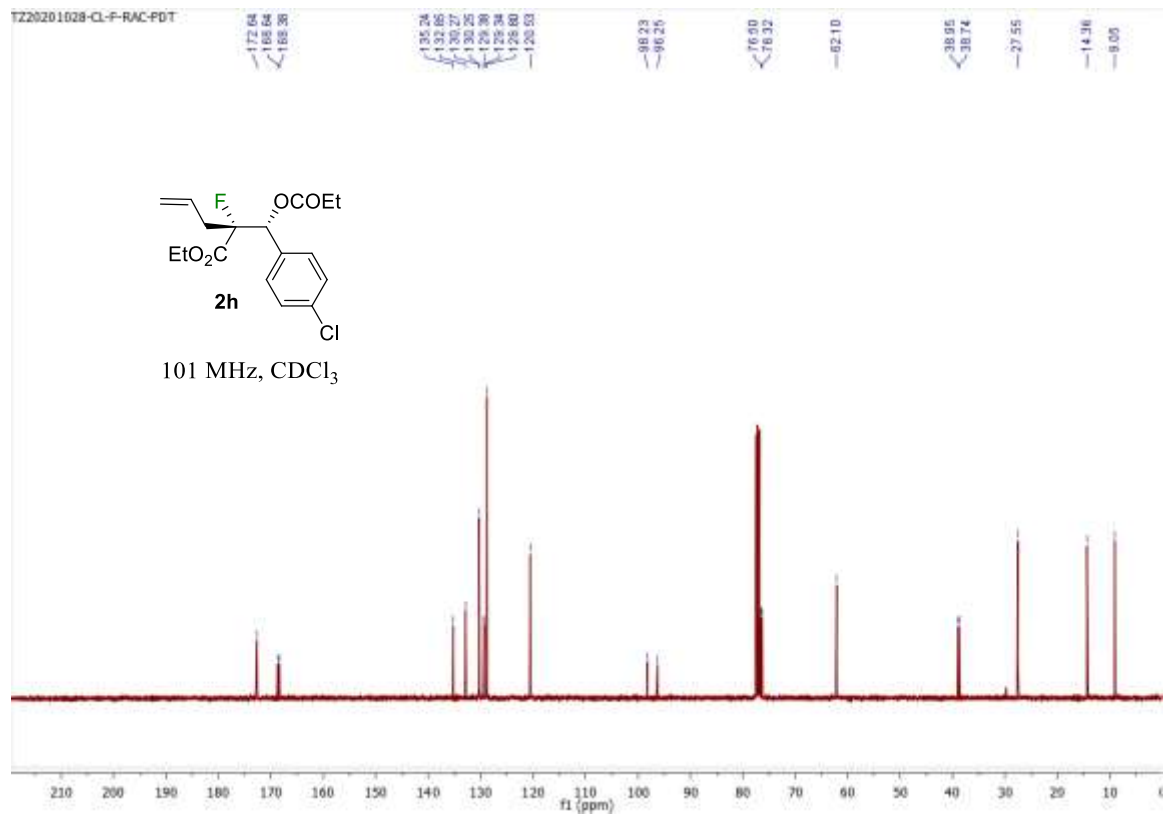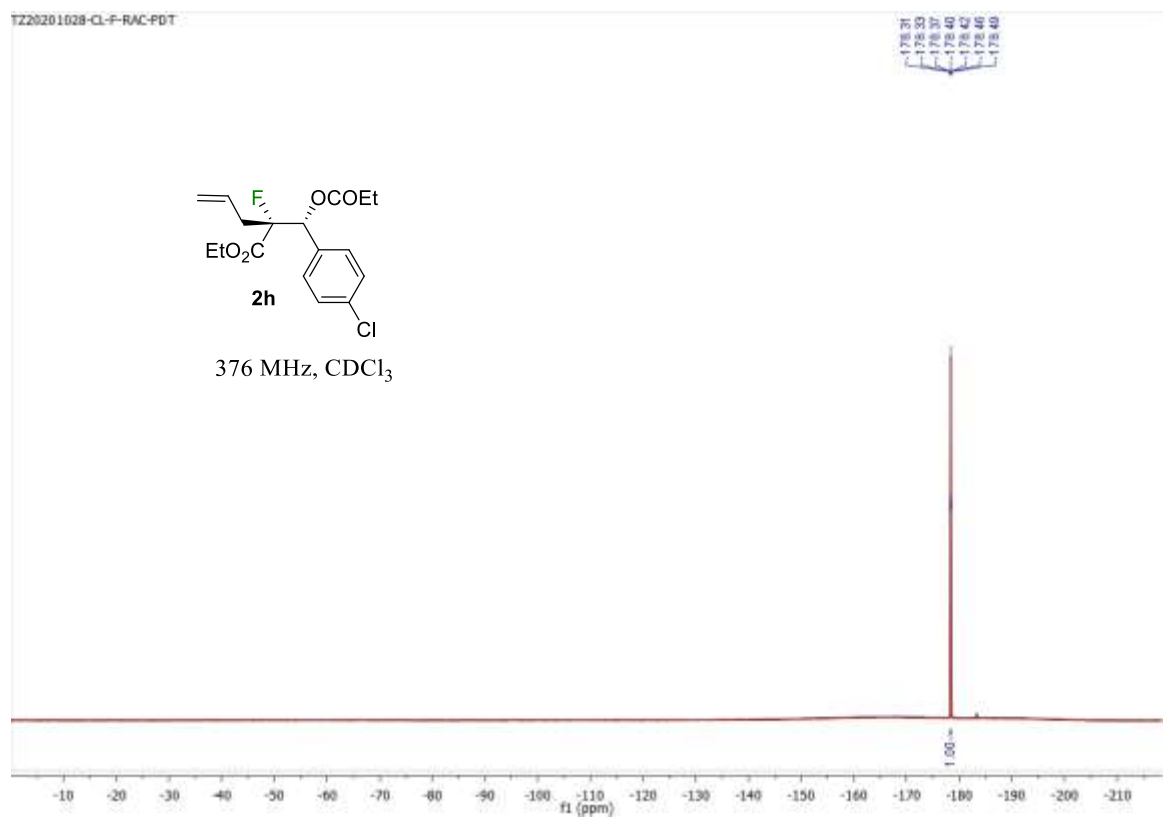

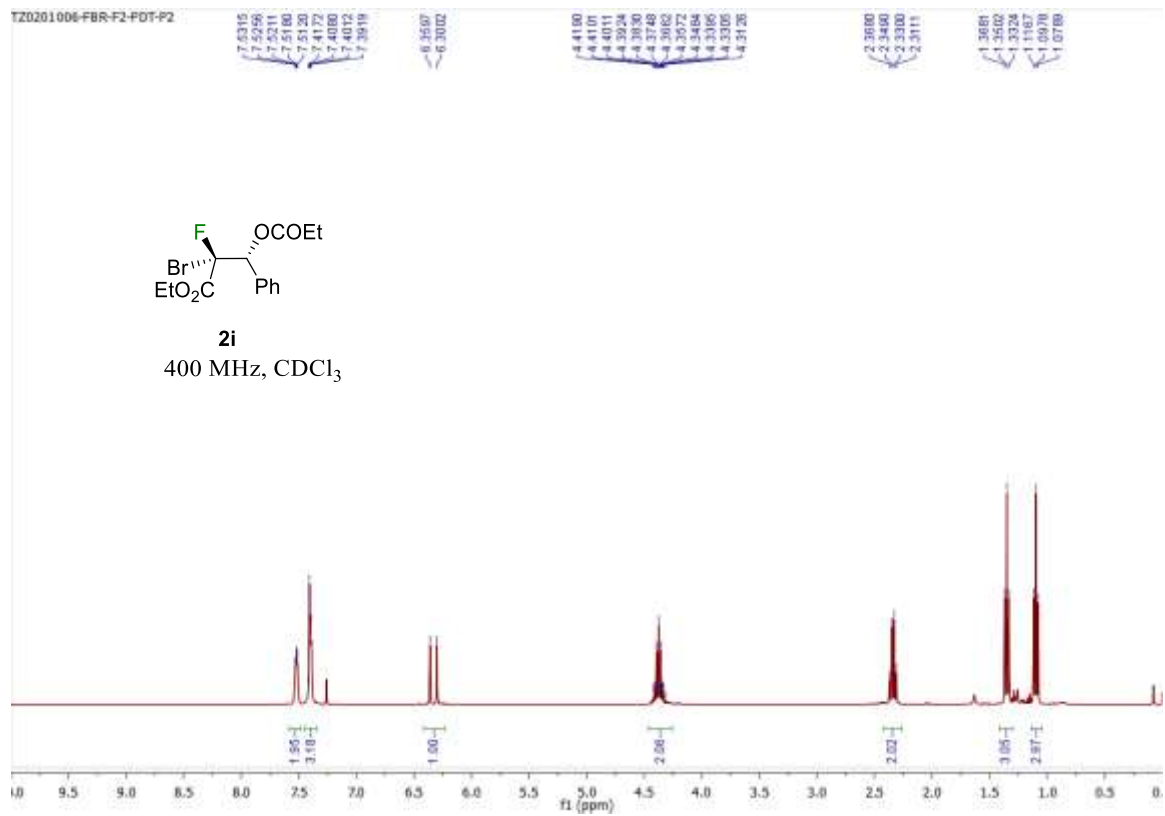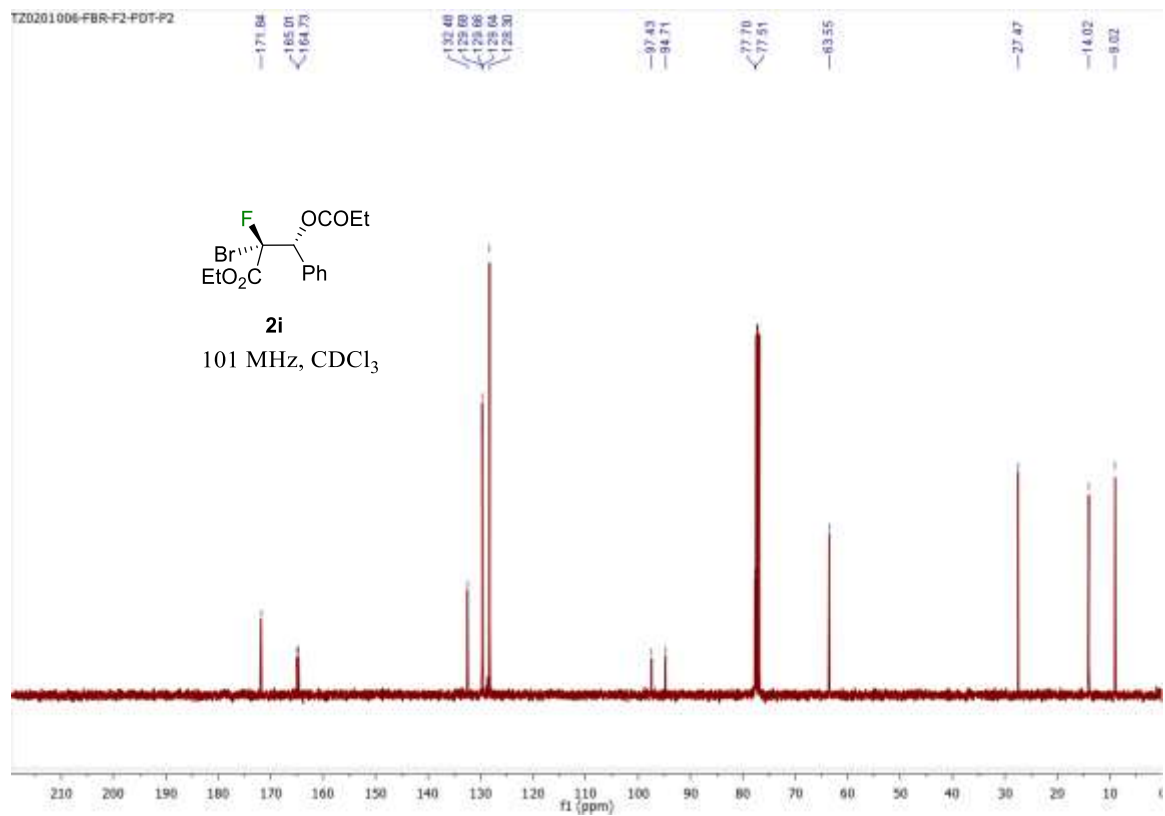

TZ0201006-FBR-F2-PDT-P2

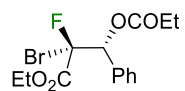

2i

376 MHz, CDCl<sub>3</sub>

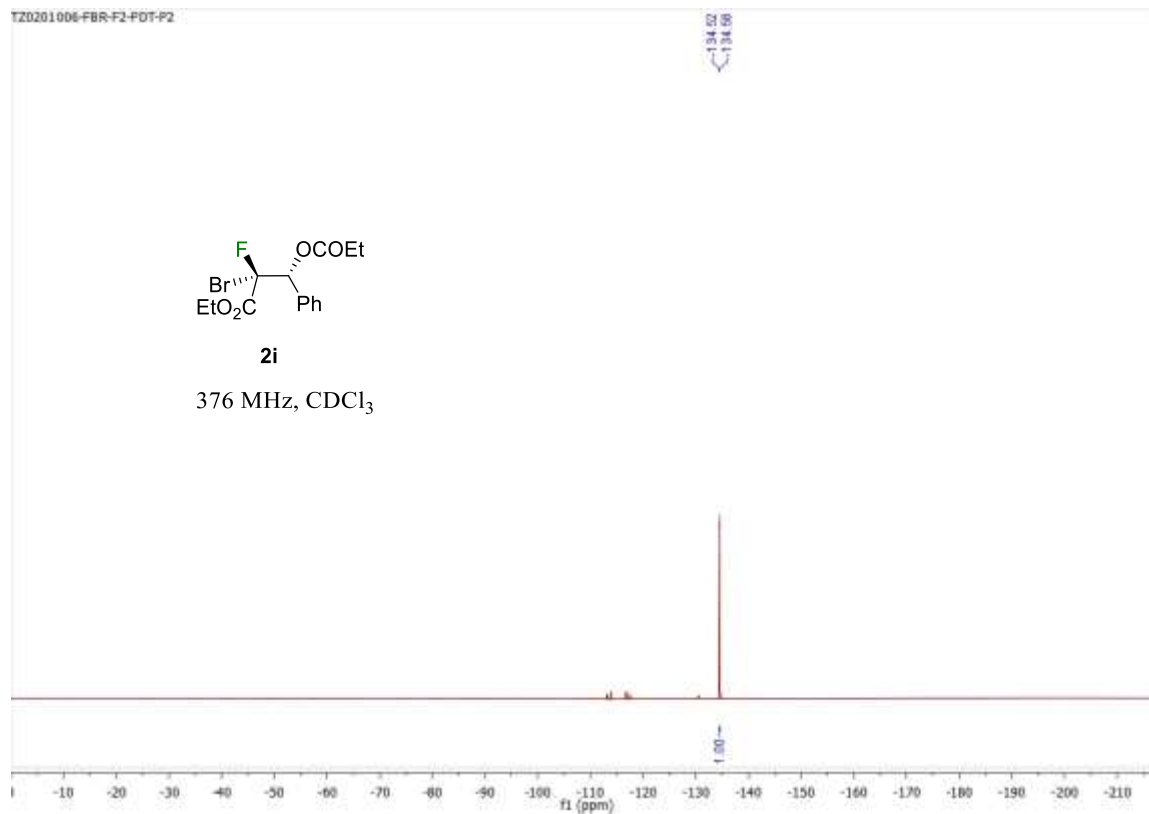

tz20201008-fbr-f1-pdt

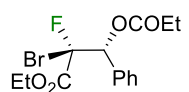

2j

400 MHz, CDCl<sub>3</sub>

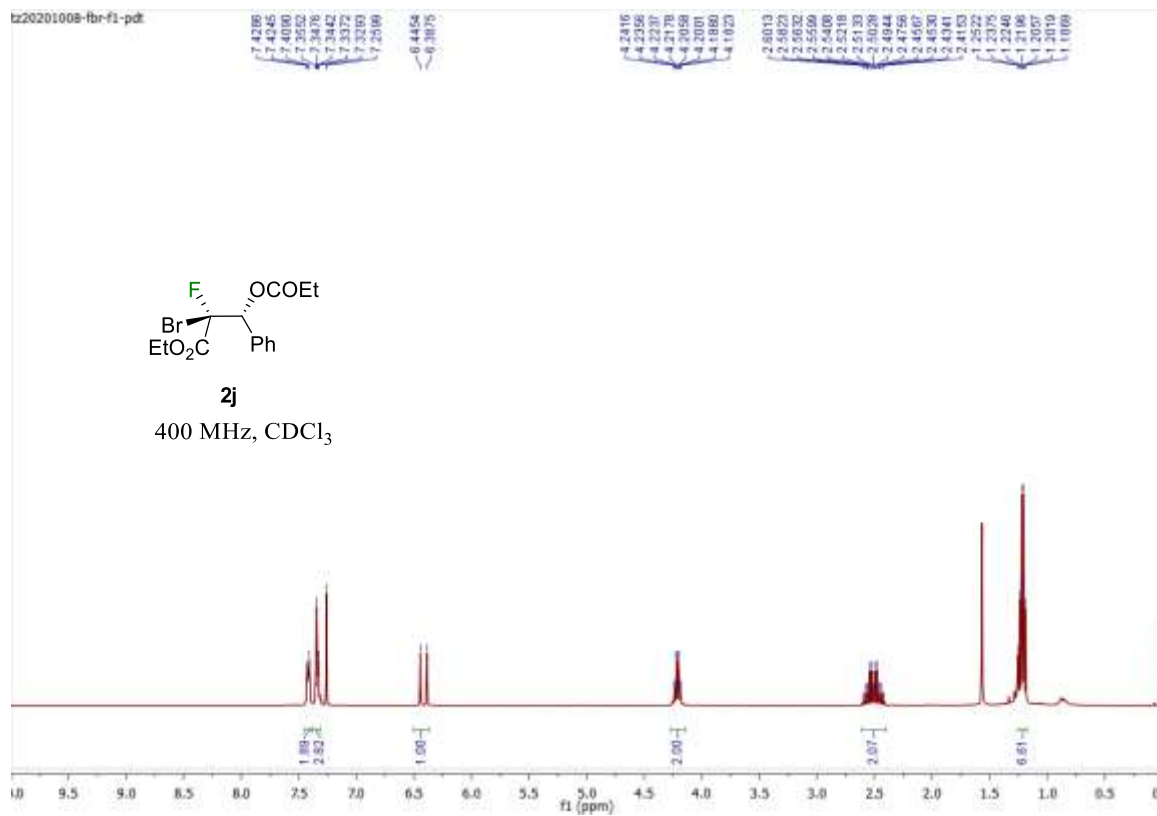

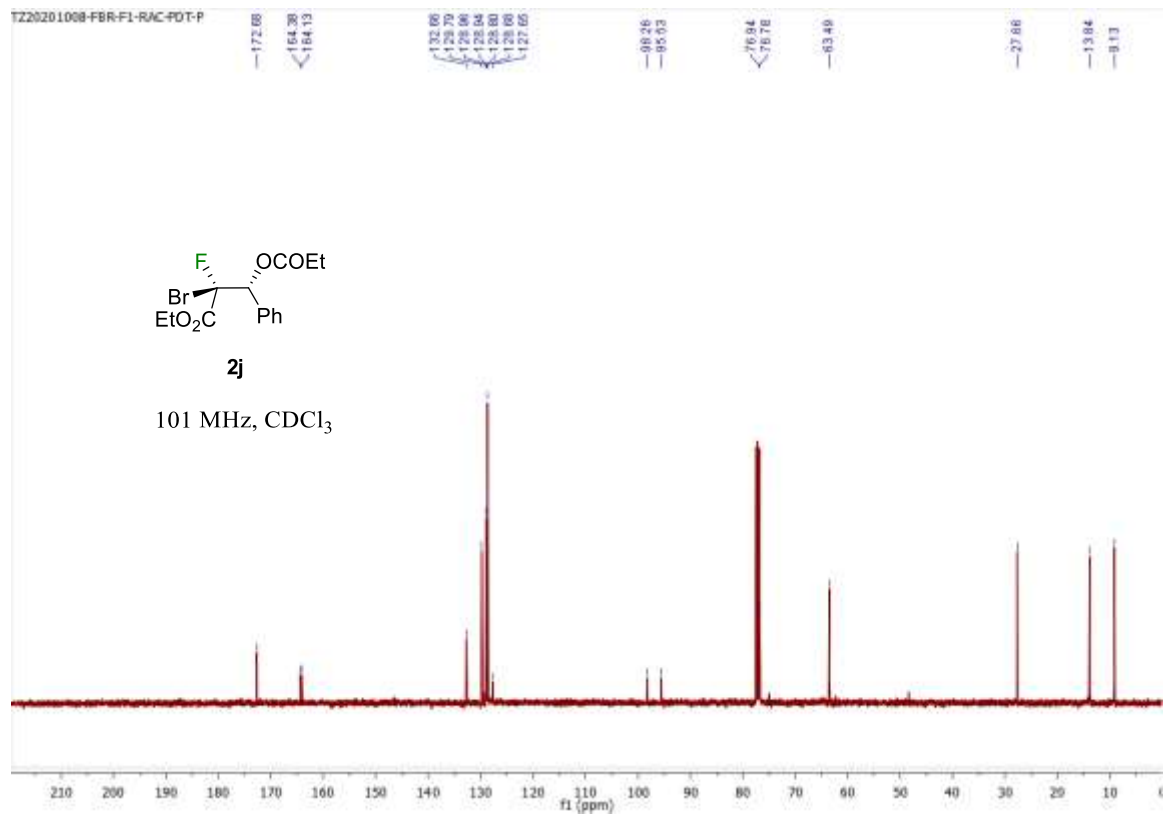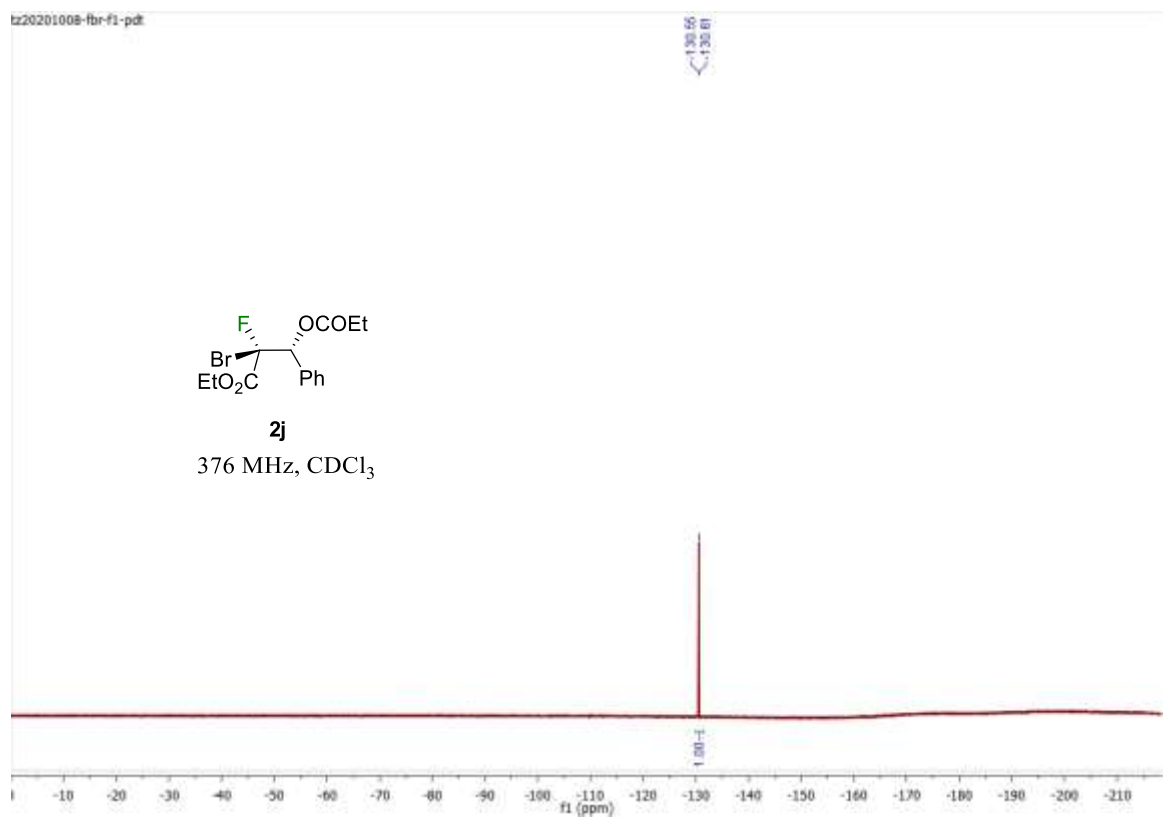

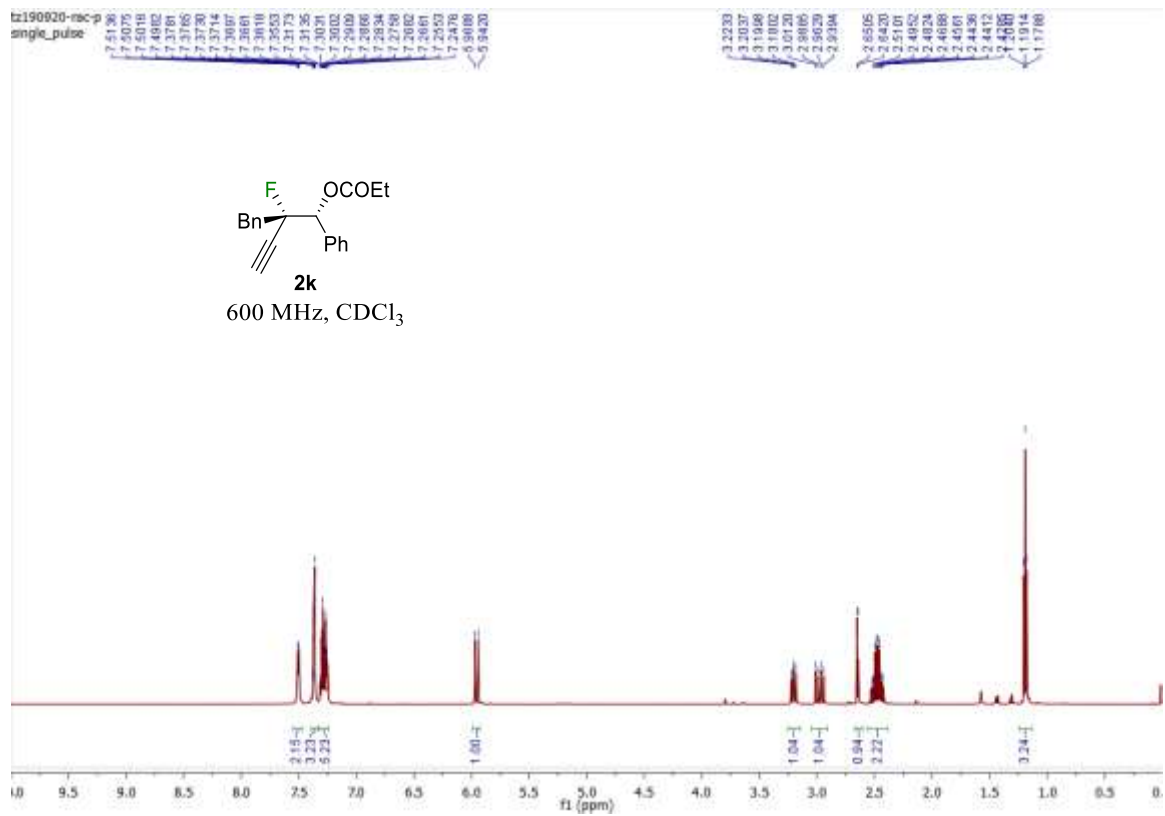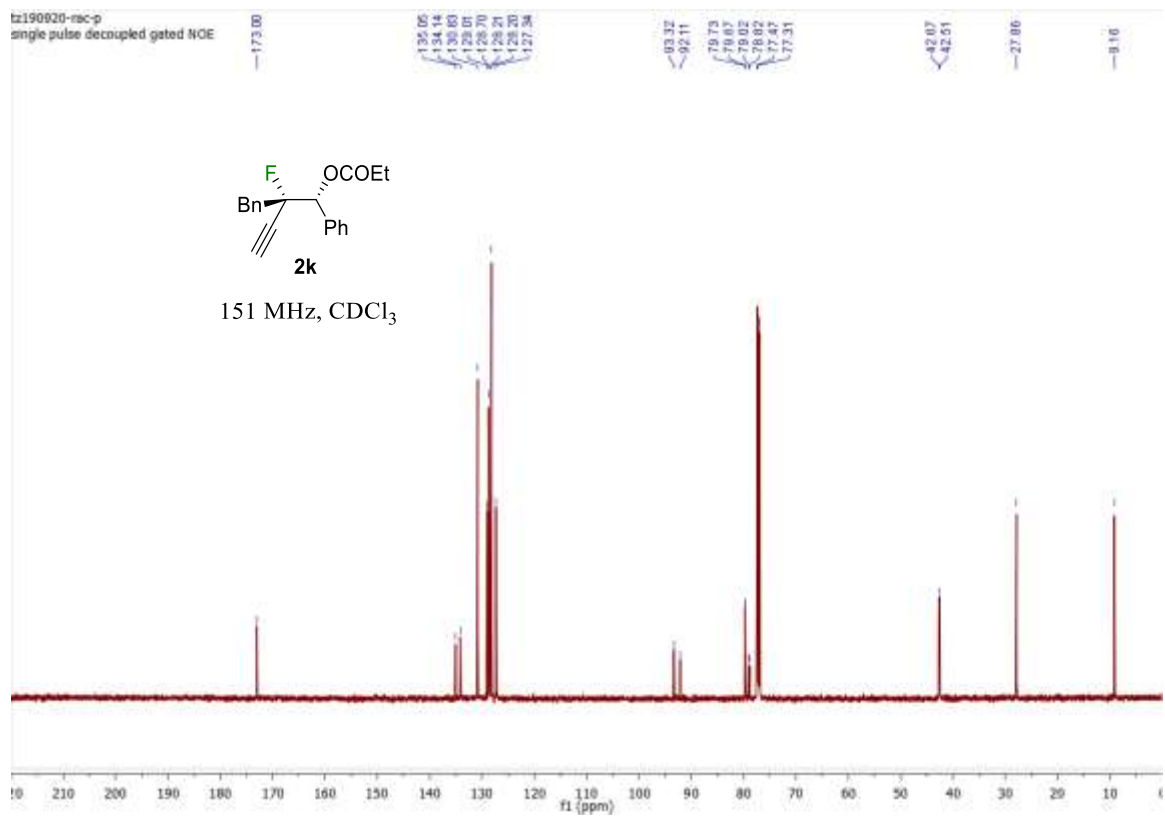

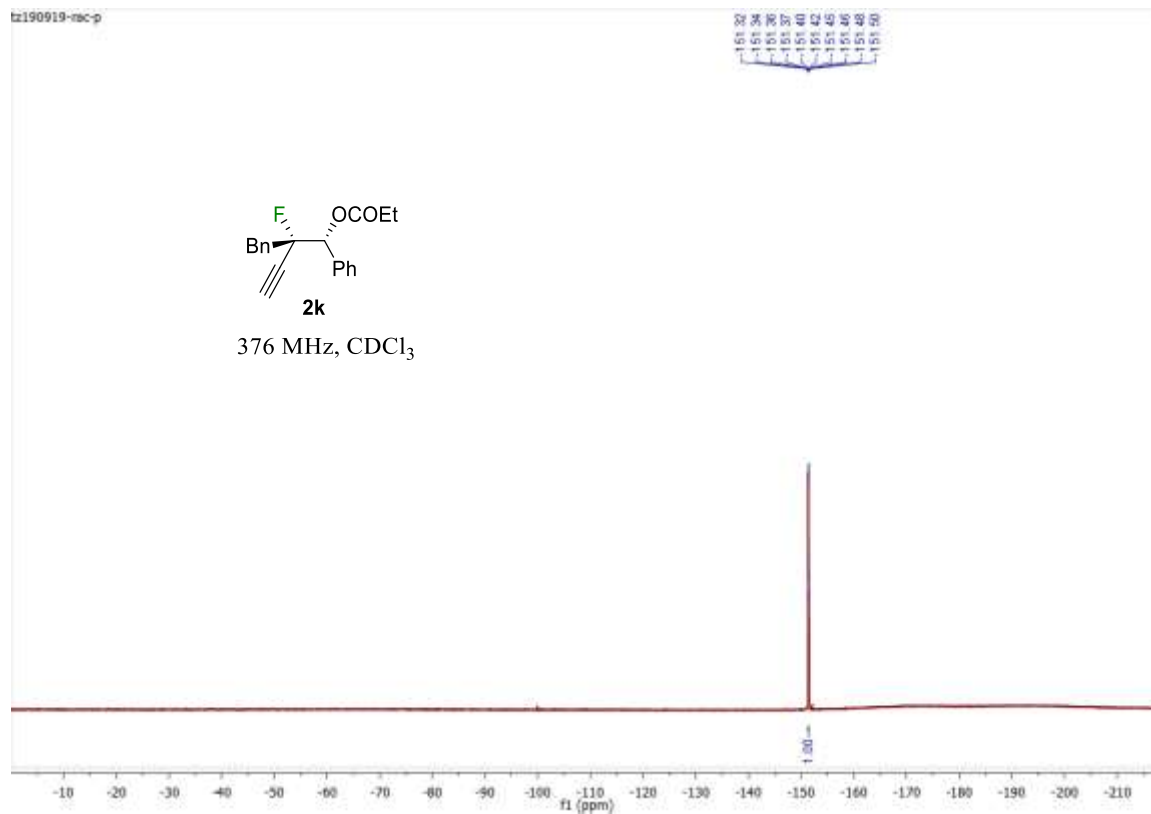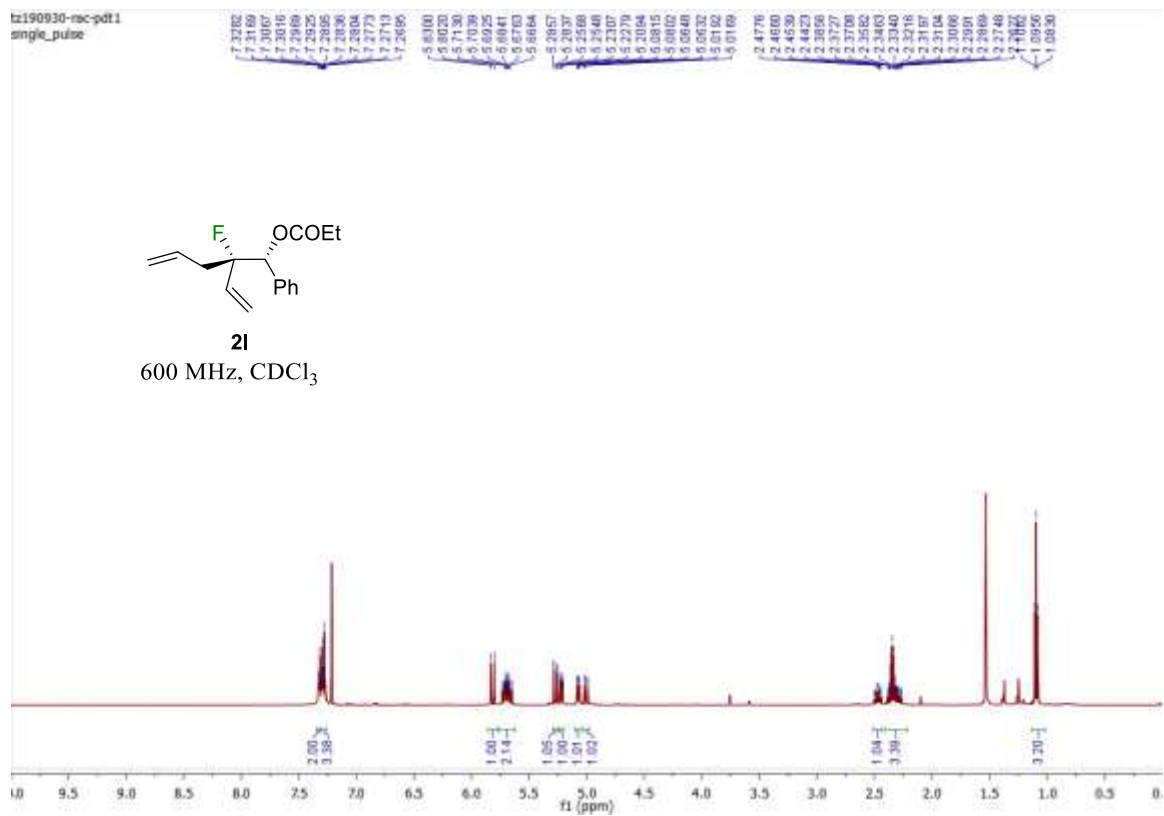



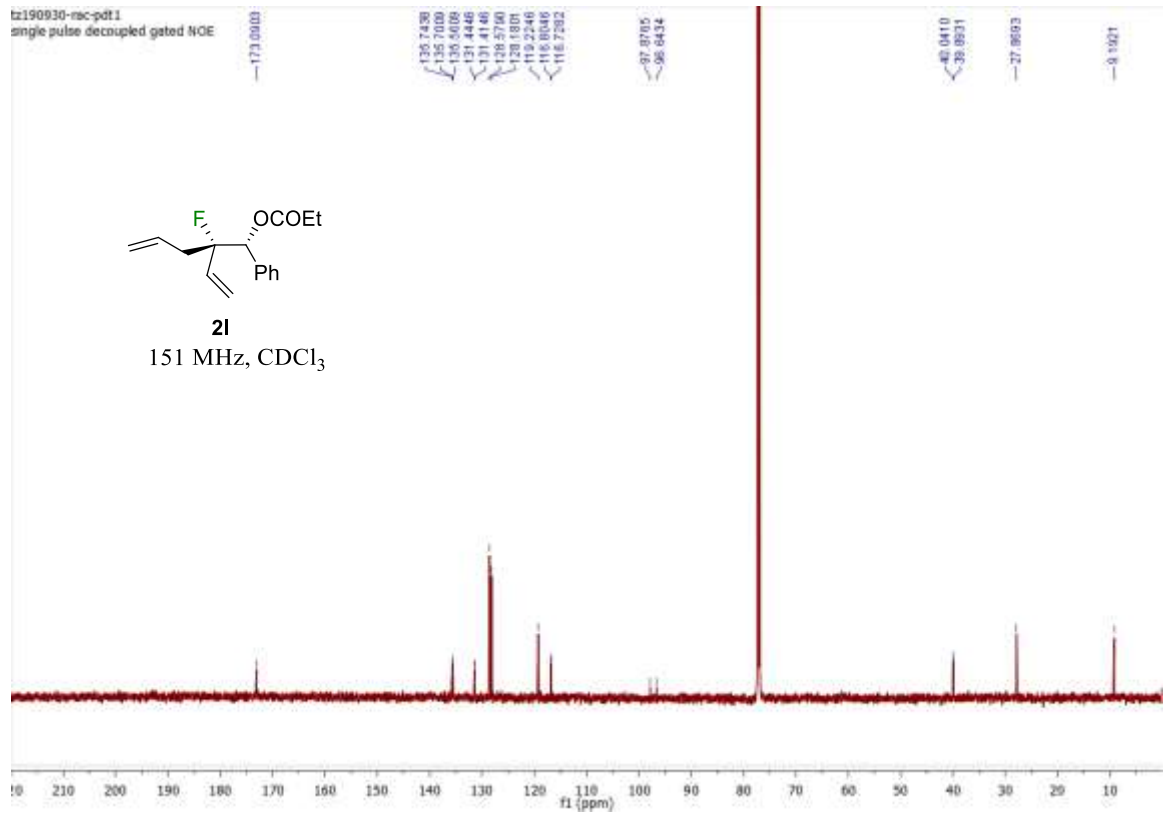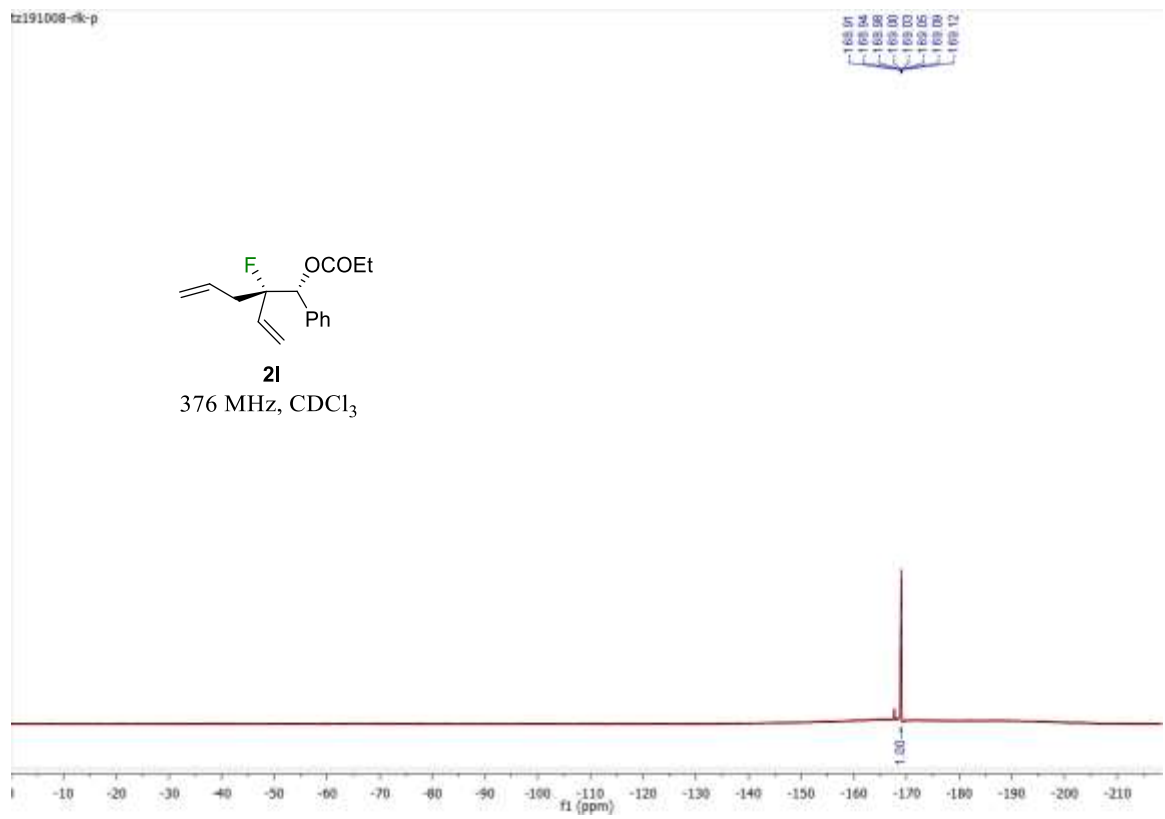

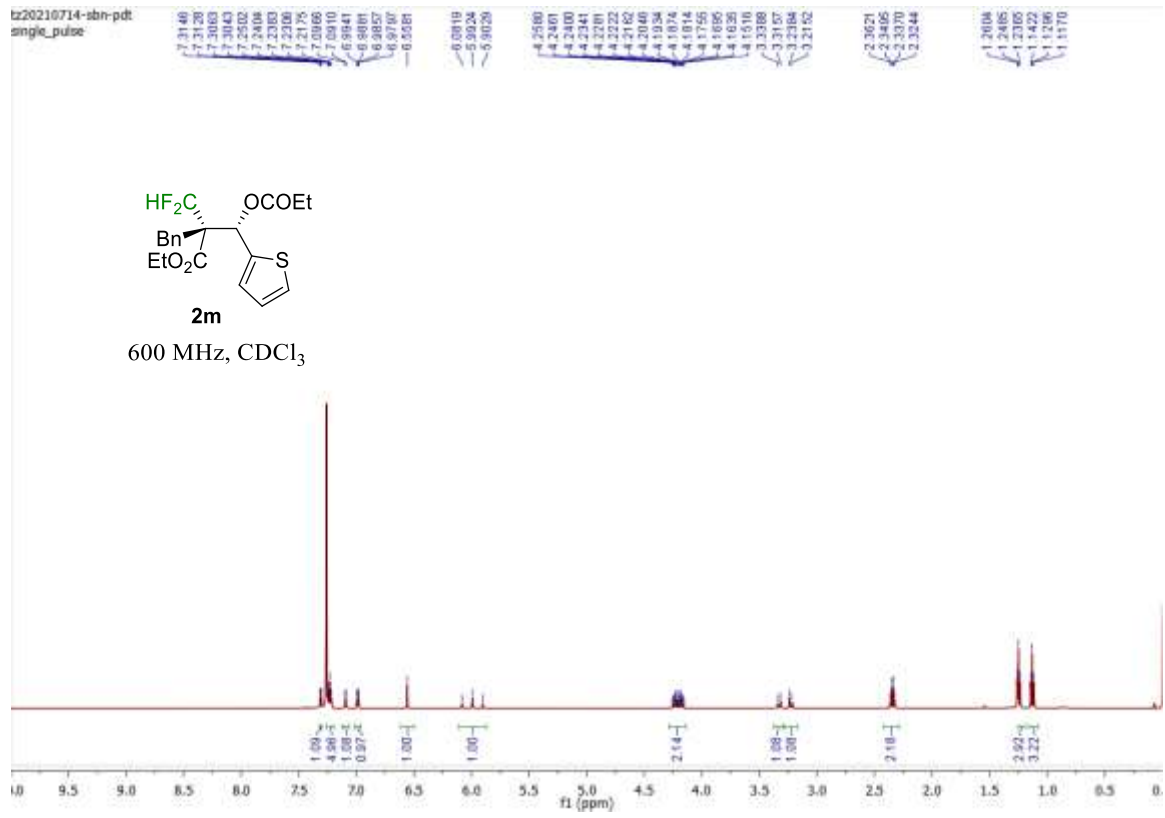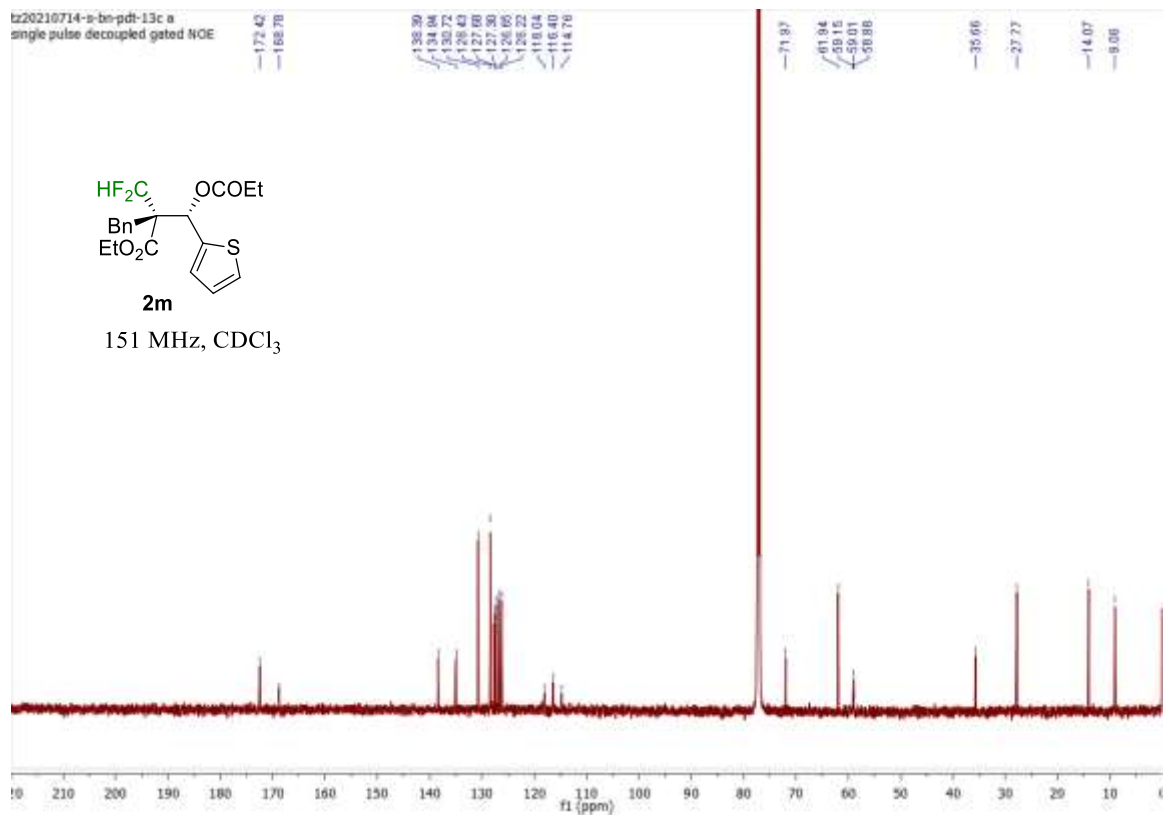

tz20210714-s-bn-pdf

-124.48  
-124.02  
-122.33  
-122.29  
-121.95  
-121.86  
-121.67  
-121.67  
-128.12

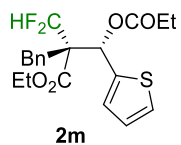

376 MHz, CDCl<sub>3</sub>

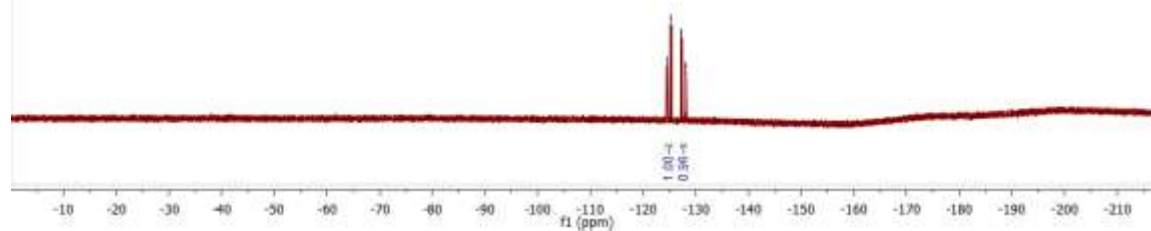

tz191104-nccp

7.4024  
7.4117  
7.3753  
7.3562  
7.2538  
7.2356  
7.2200  
7.2053  
7.1740  
7.1562  
6.4340  
6.4268  
6.3936  
6.3706  
6.1881  
6.1821  
6.0273  
5.8923  
4.2445  
4.2267  
4.2089  
4.1911  
-3.0099  
2.3376  
2.3585  
2.3503  
2.3399  
2.3216  
2.3210  
1.2671  
1.2463  
1.2310  
1.1481  
1.1272  
1.1083

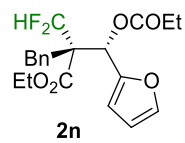

400 MHz, CDCl<sub>3</sub>

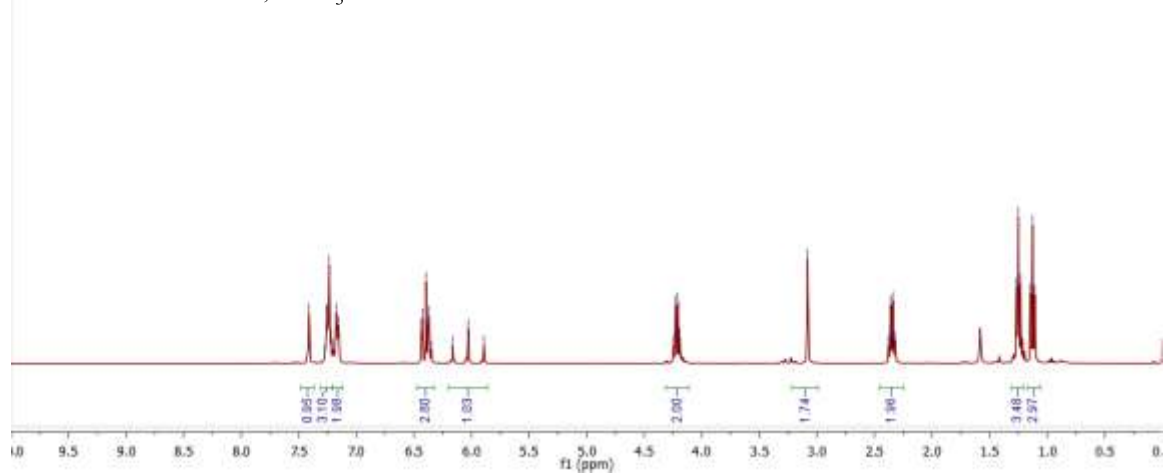

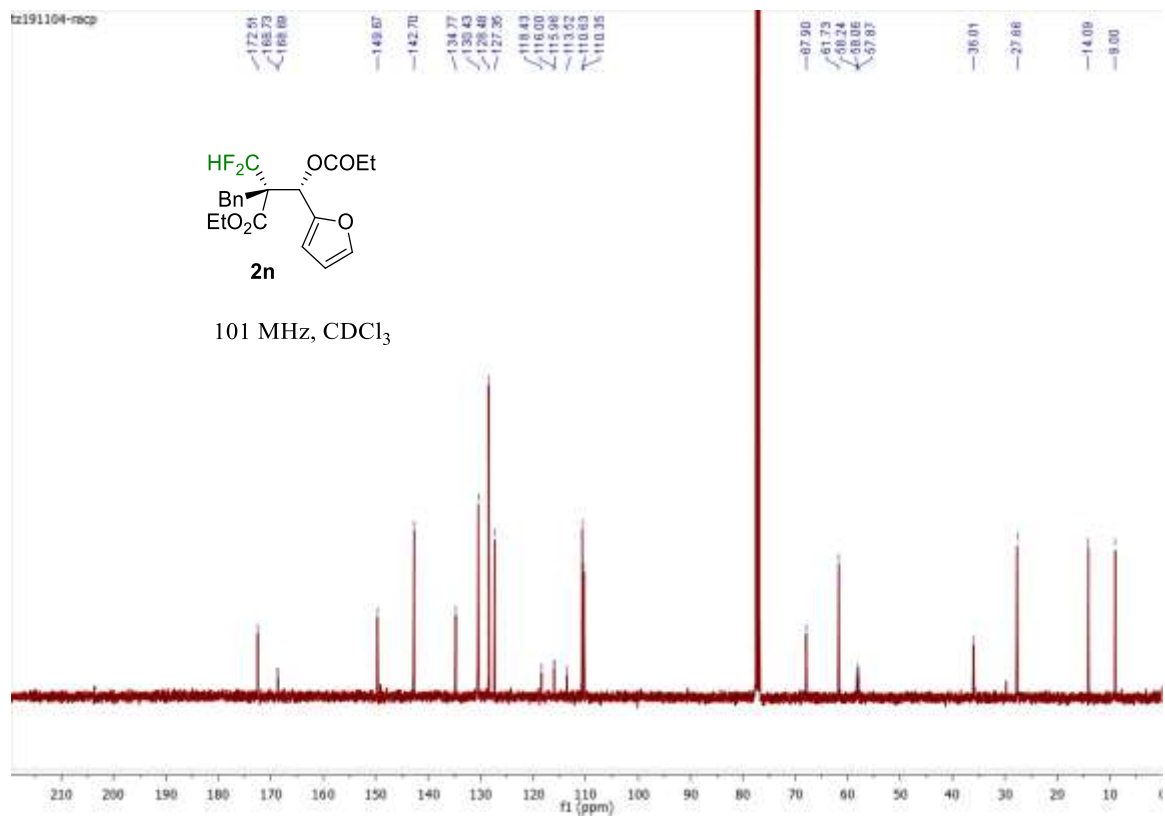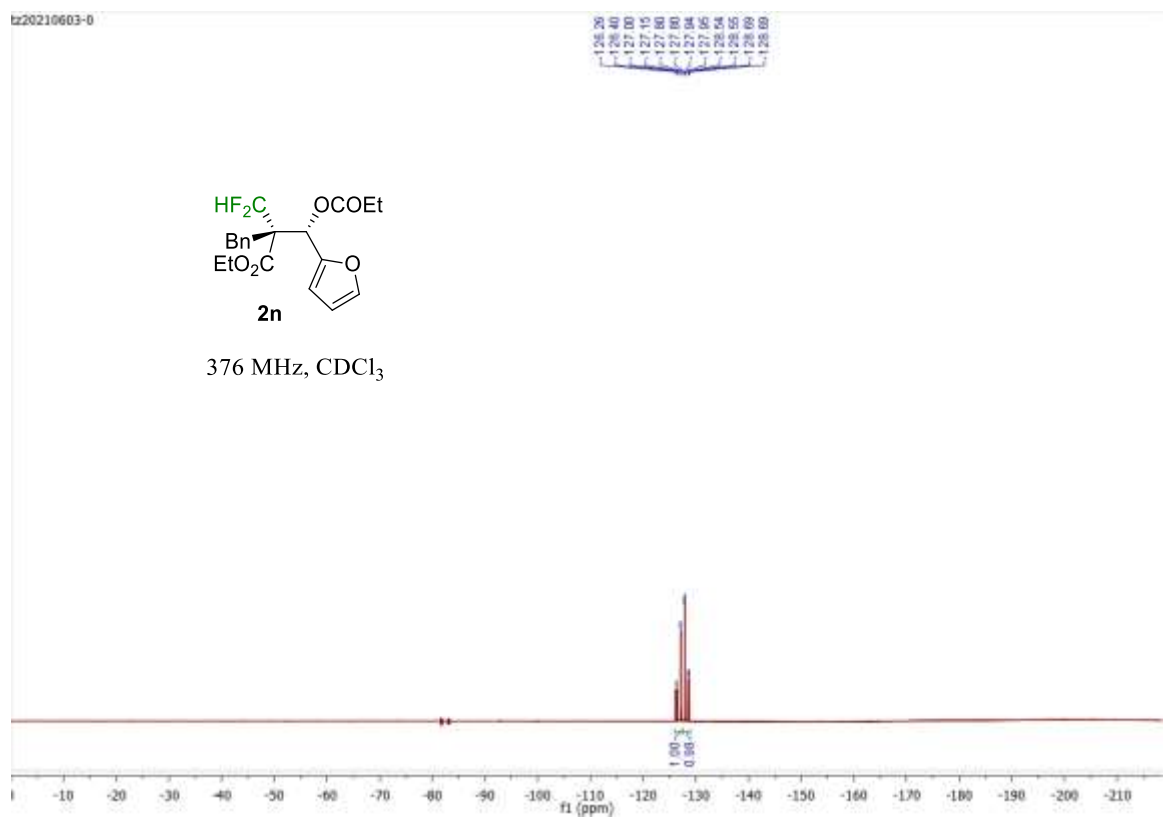

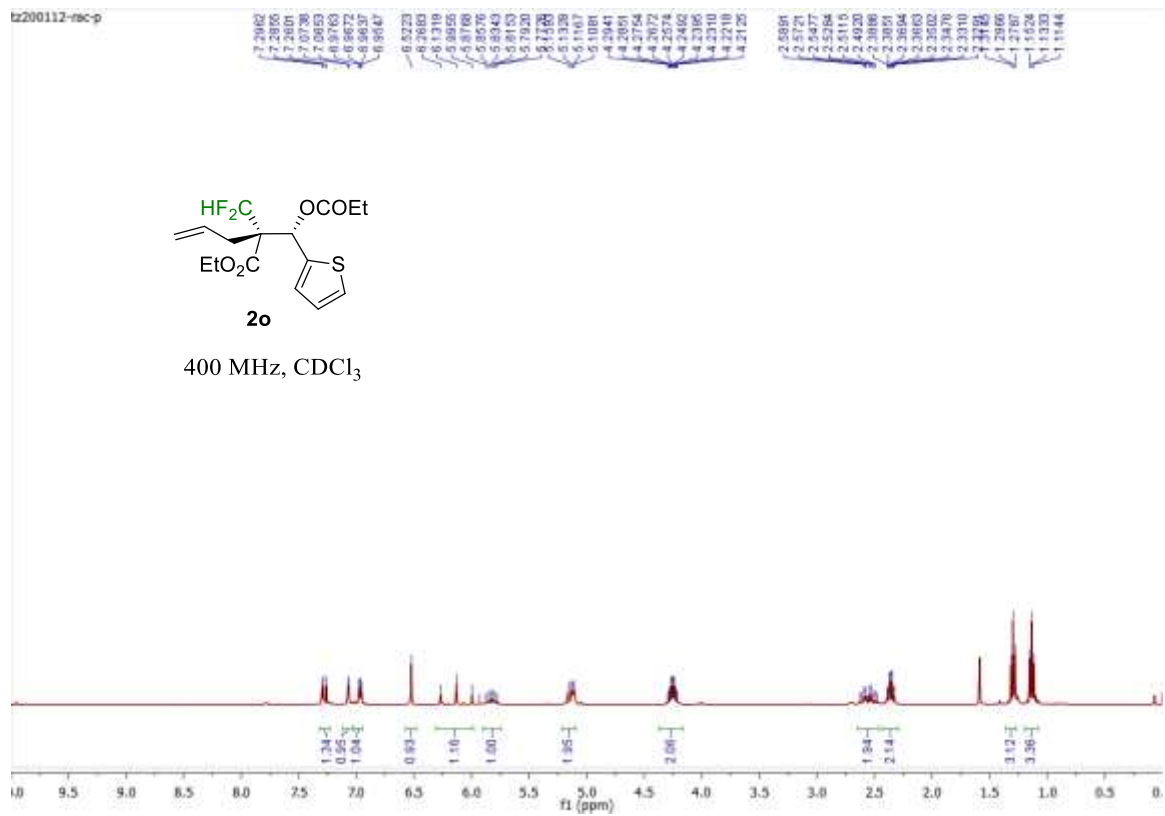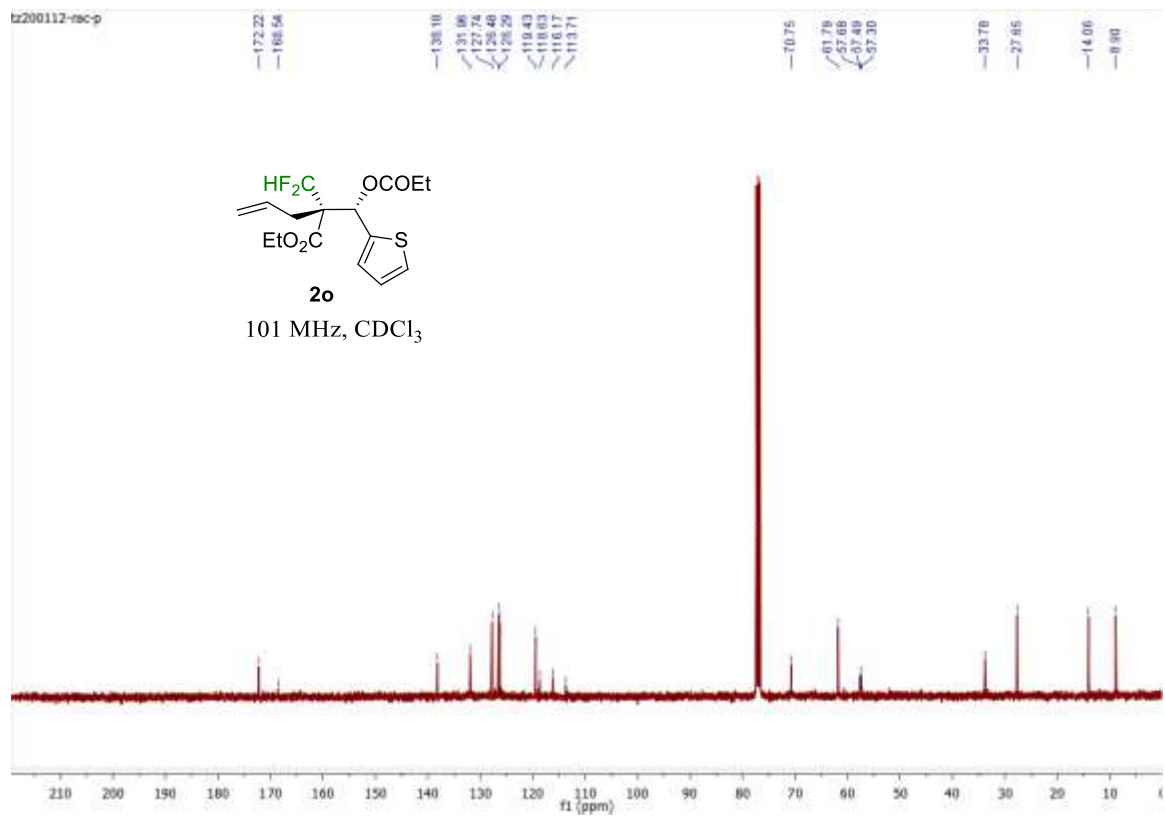

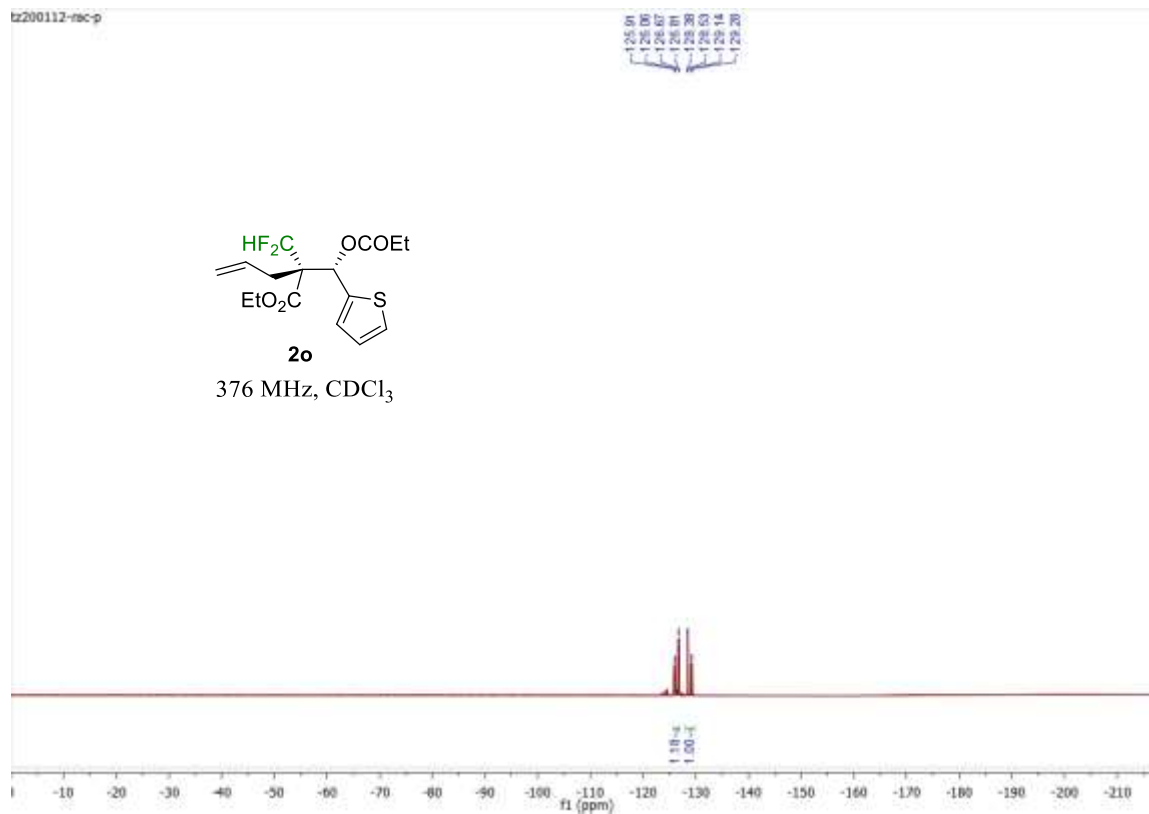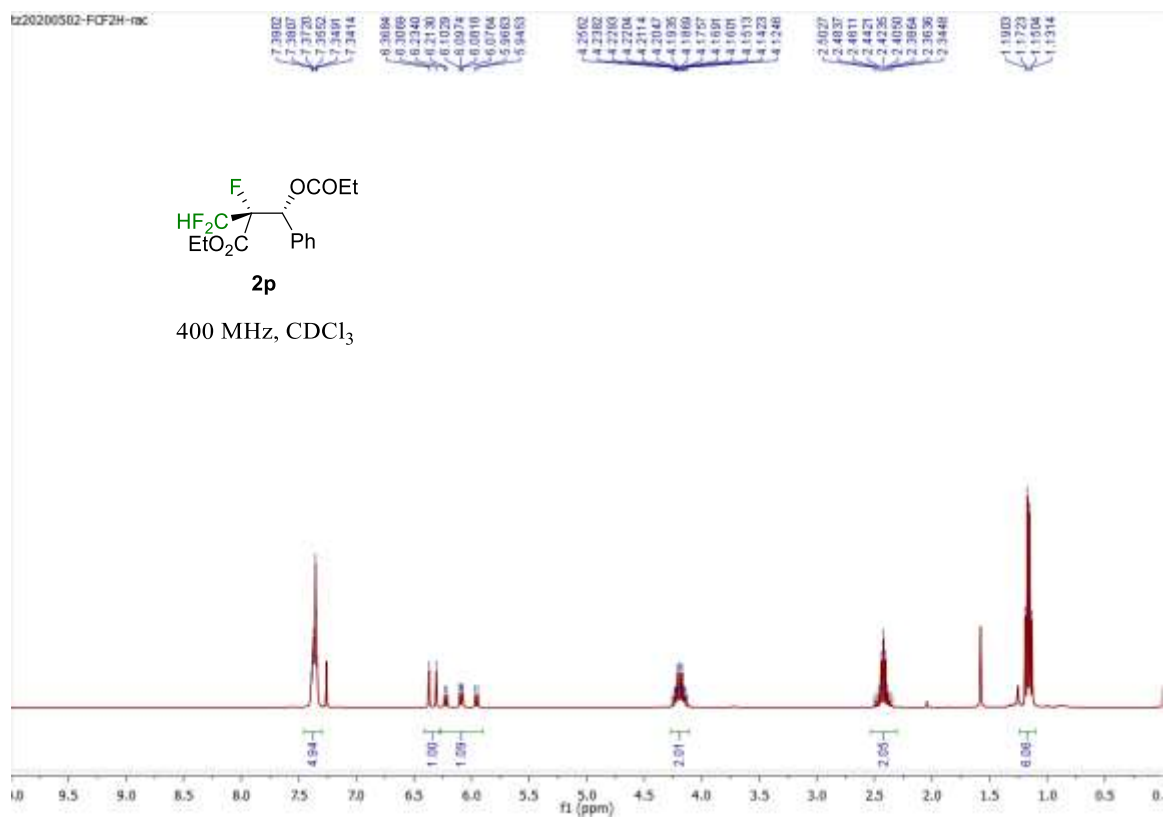

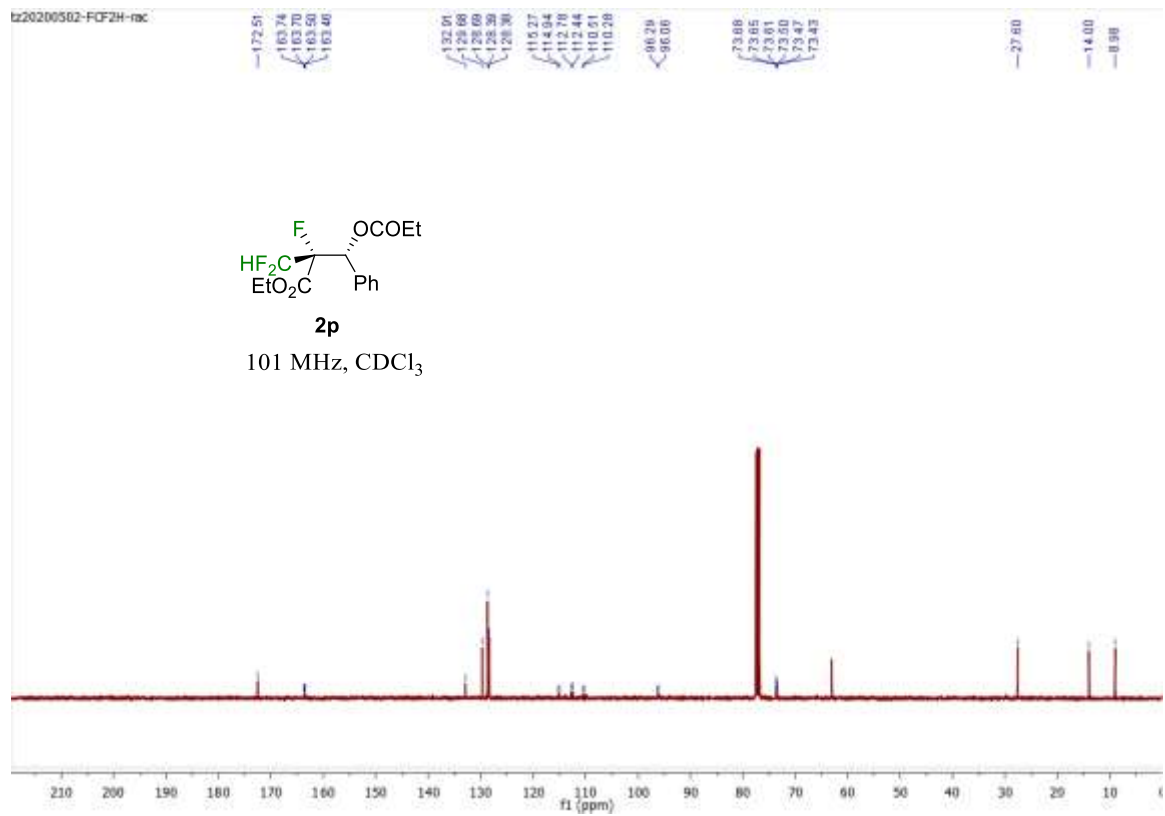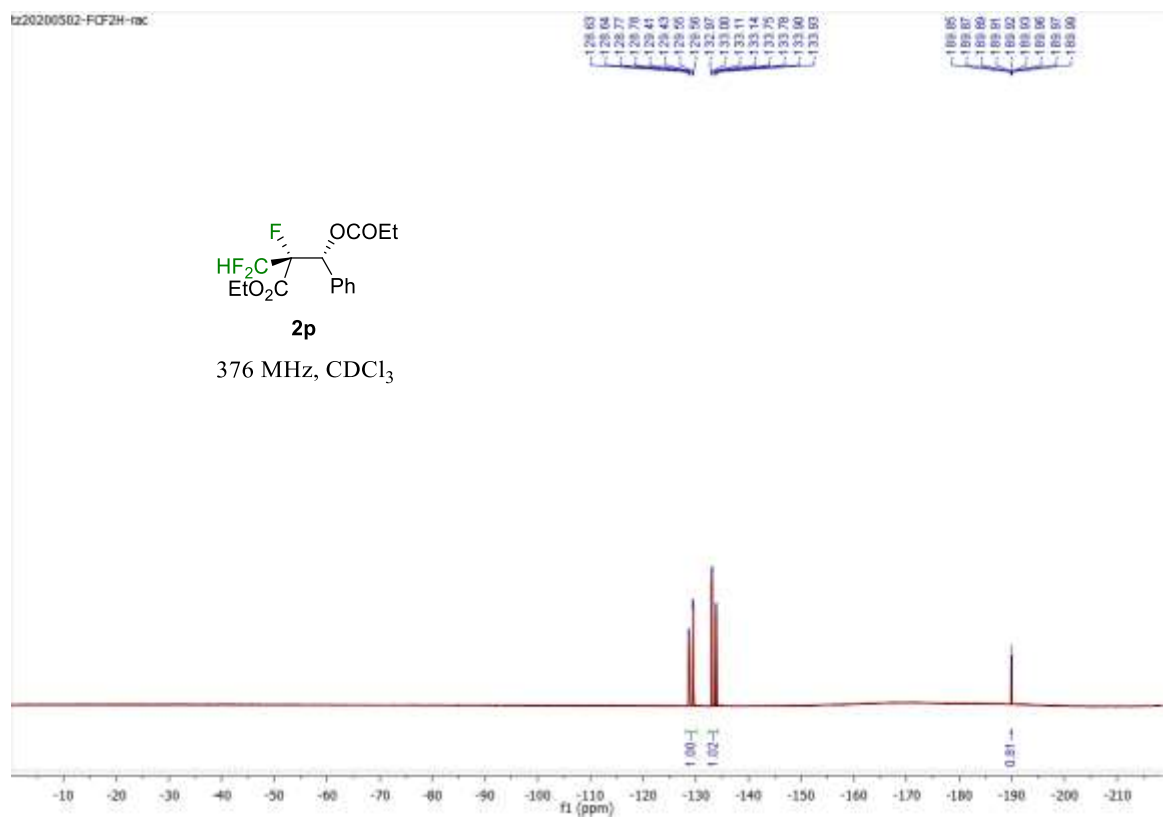

tz20200506-pdt-rac-iso-2

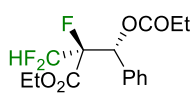

**2q**

400 MHz, CDCl<sub>3</sub>

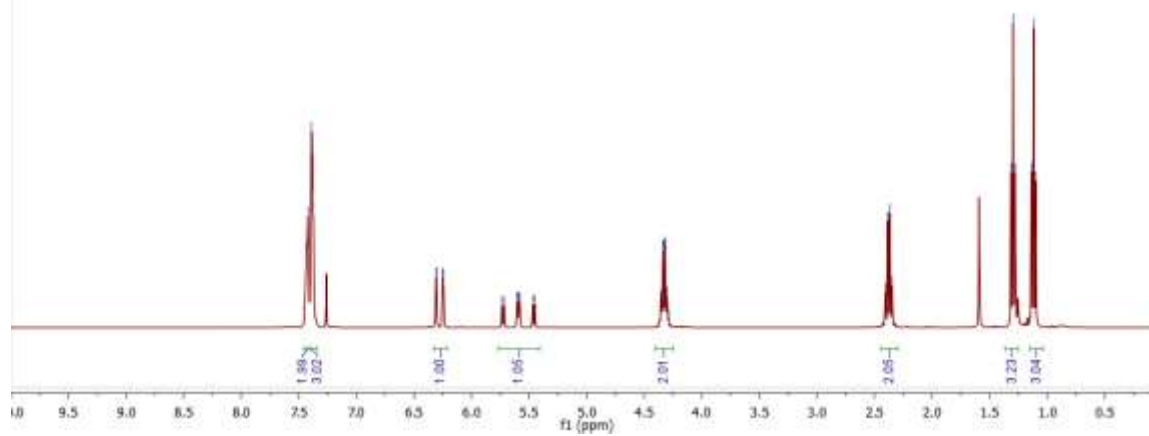

tz20200506-pdt-rac-iso-2

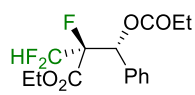

**2q**

101 MHz, CDCl<sub>3</sub>

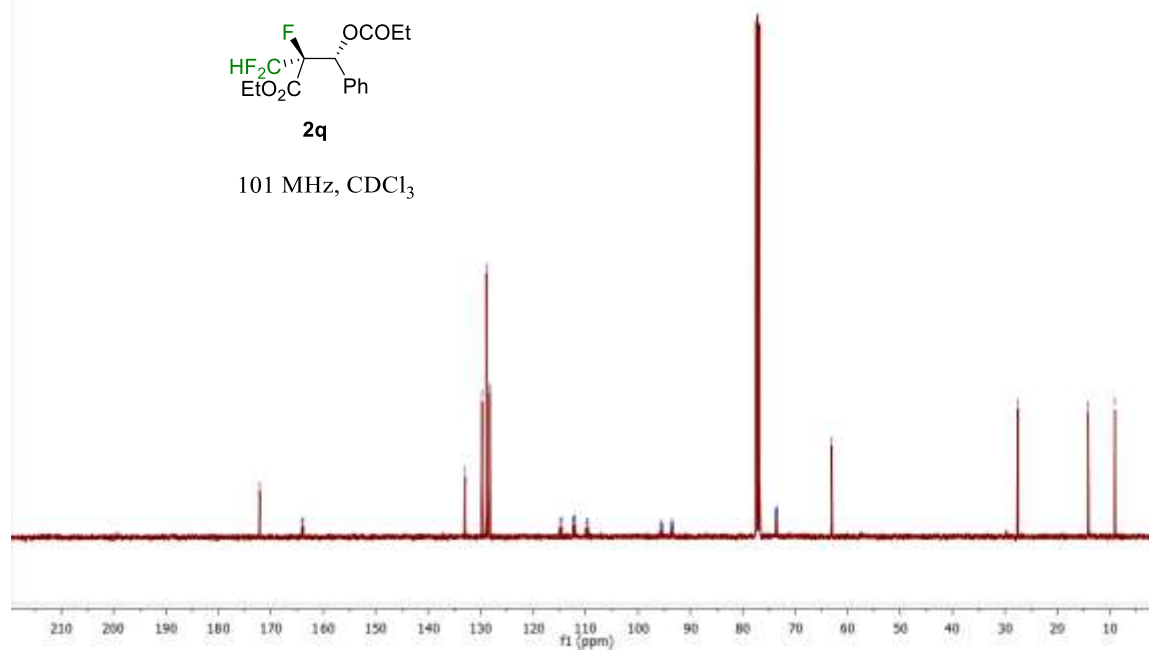



tz20200506-pdt-rac-iso-2

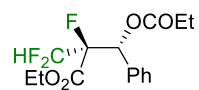

**2q**

376 MHz, CDCl<sub>3</sub>

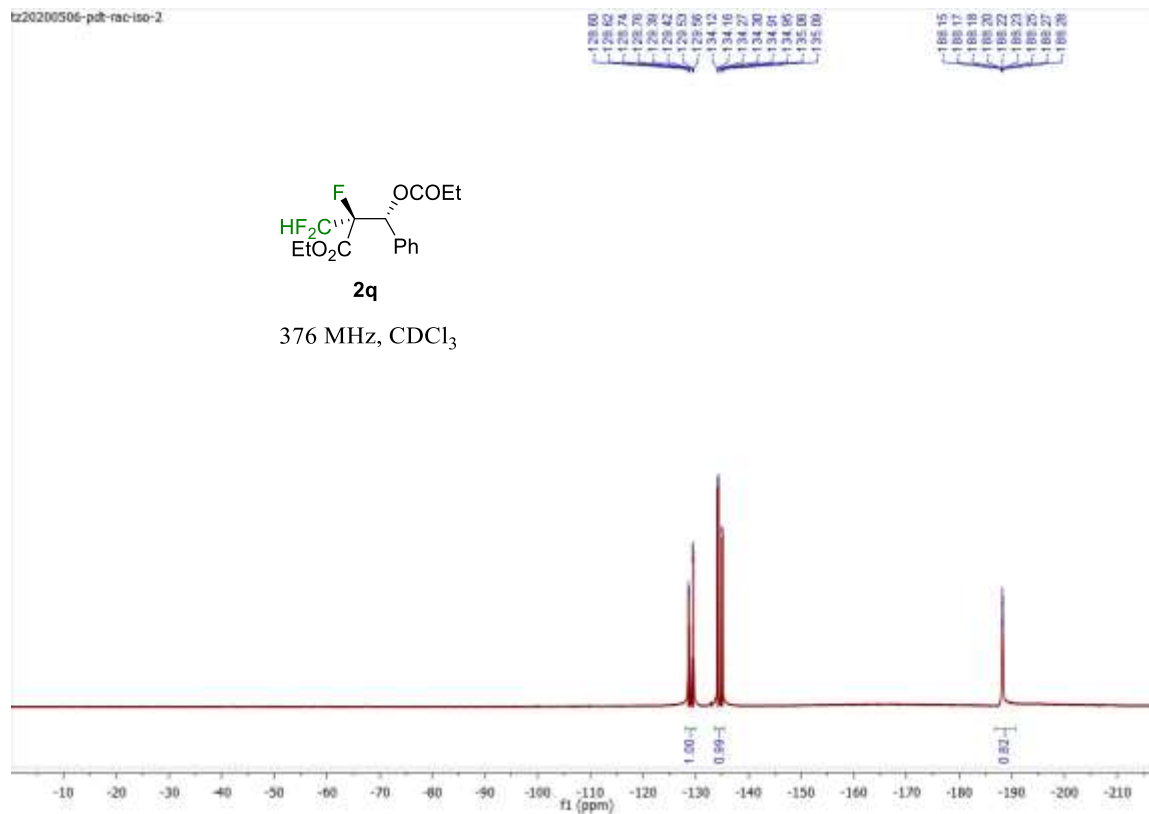

tz191118-rec-p

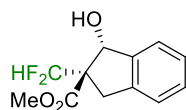

**2r**

400 MHz, CDCl<sub>3</sub>

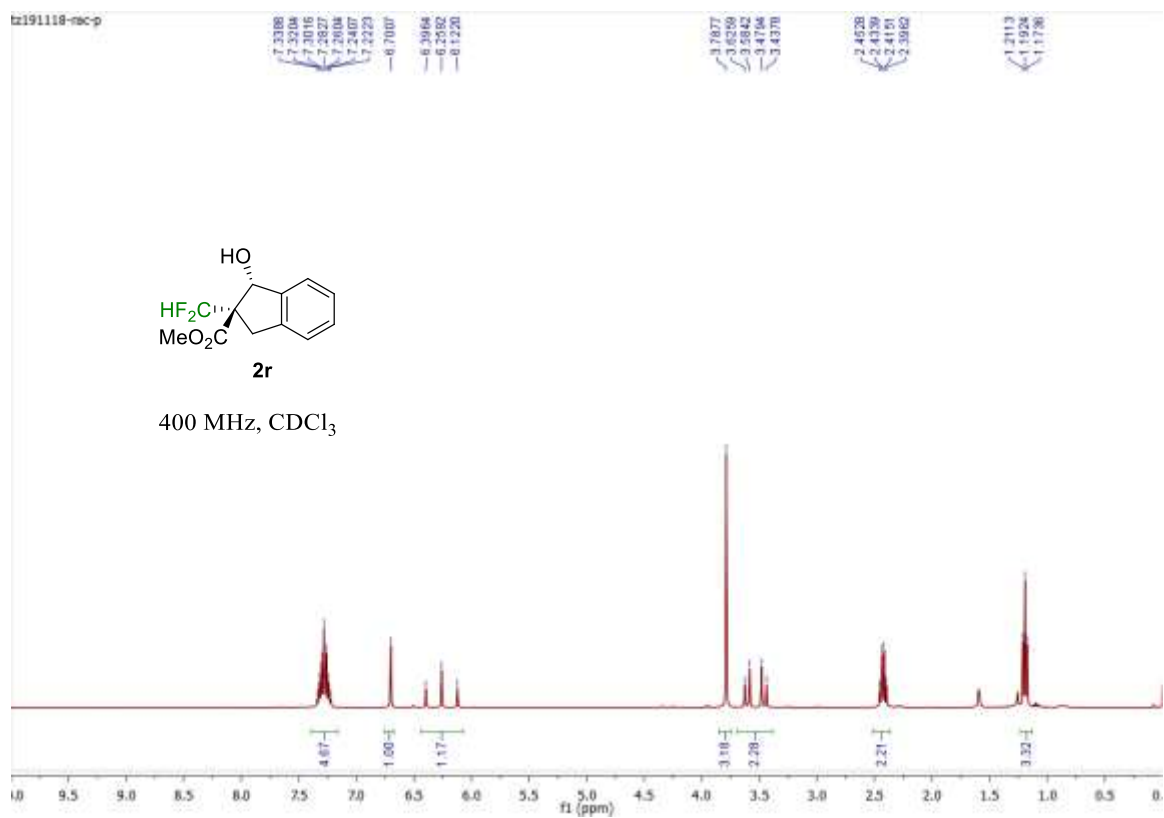

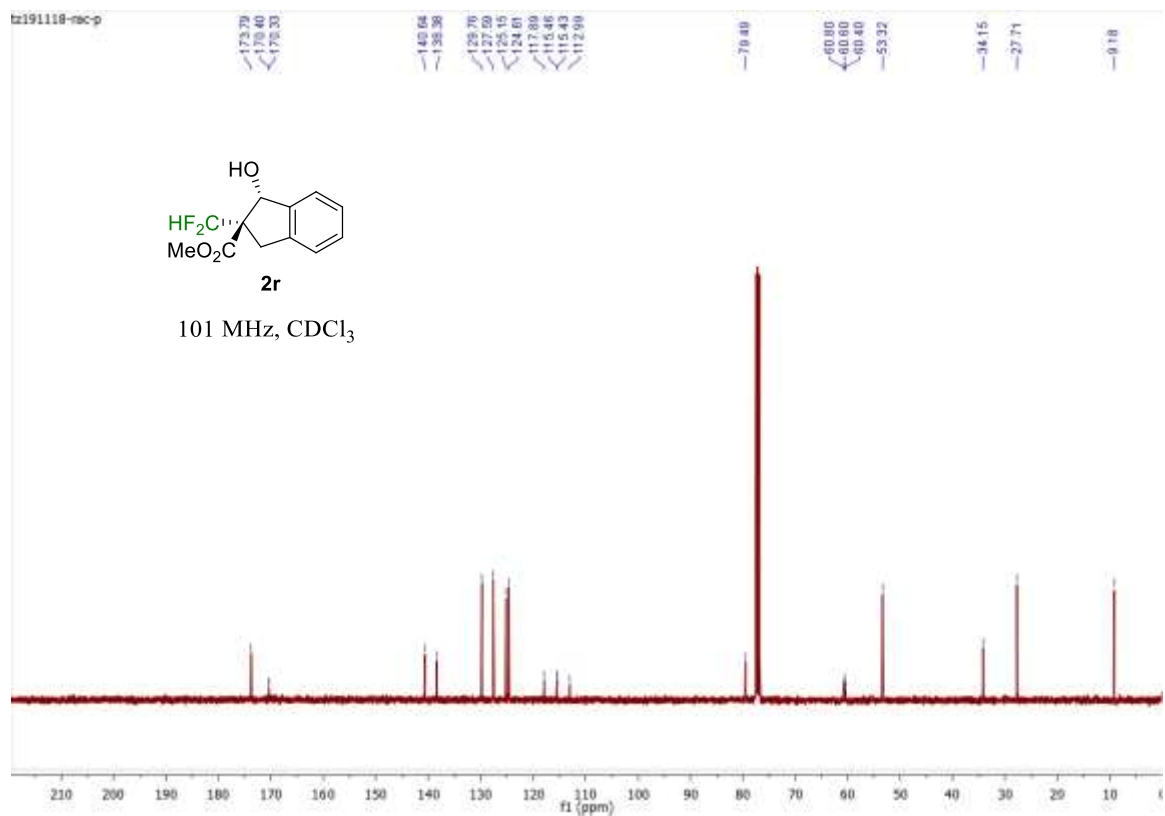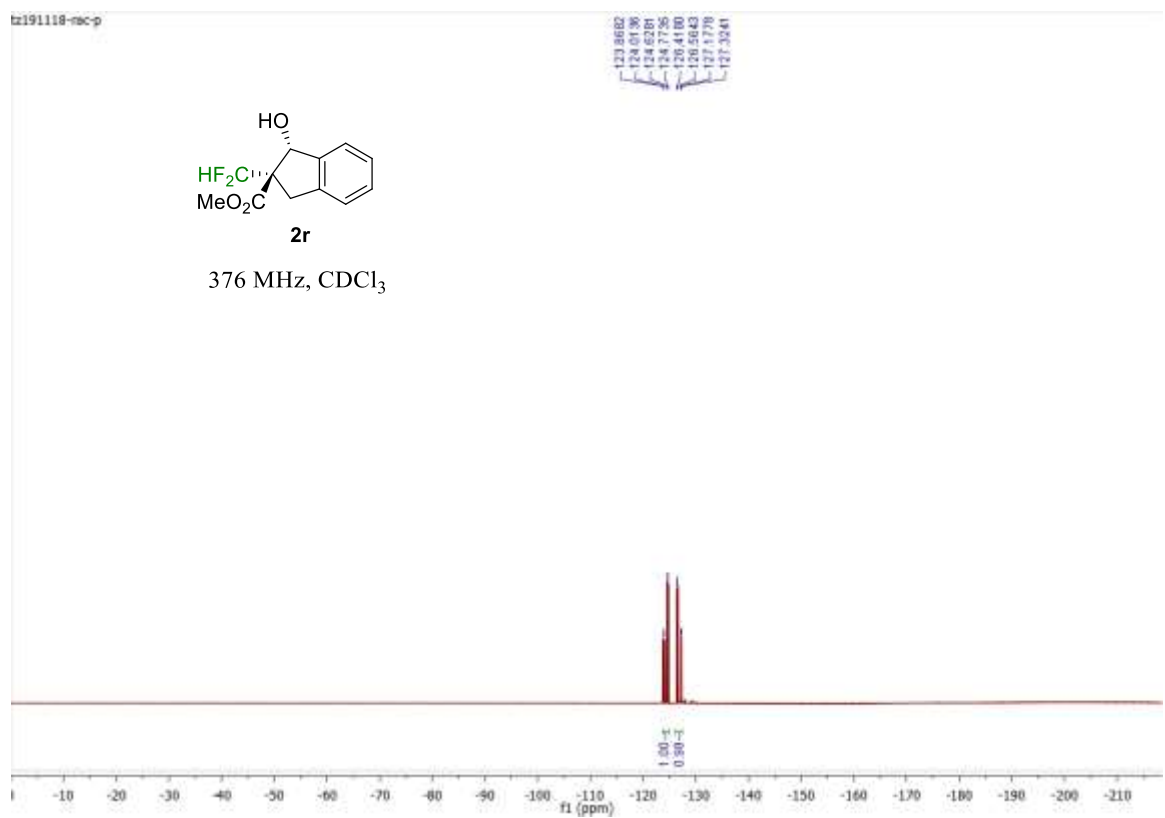

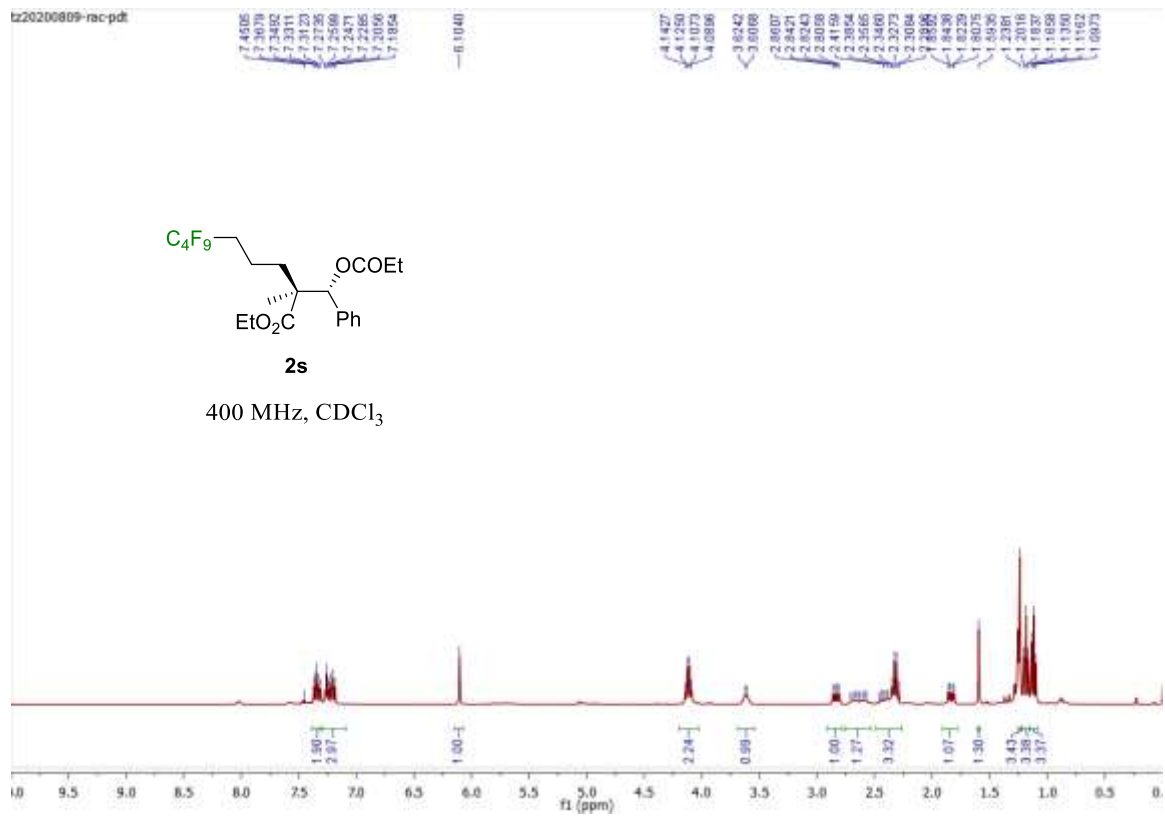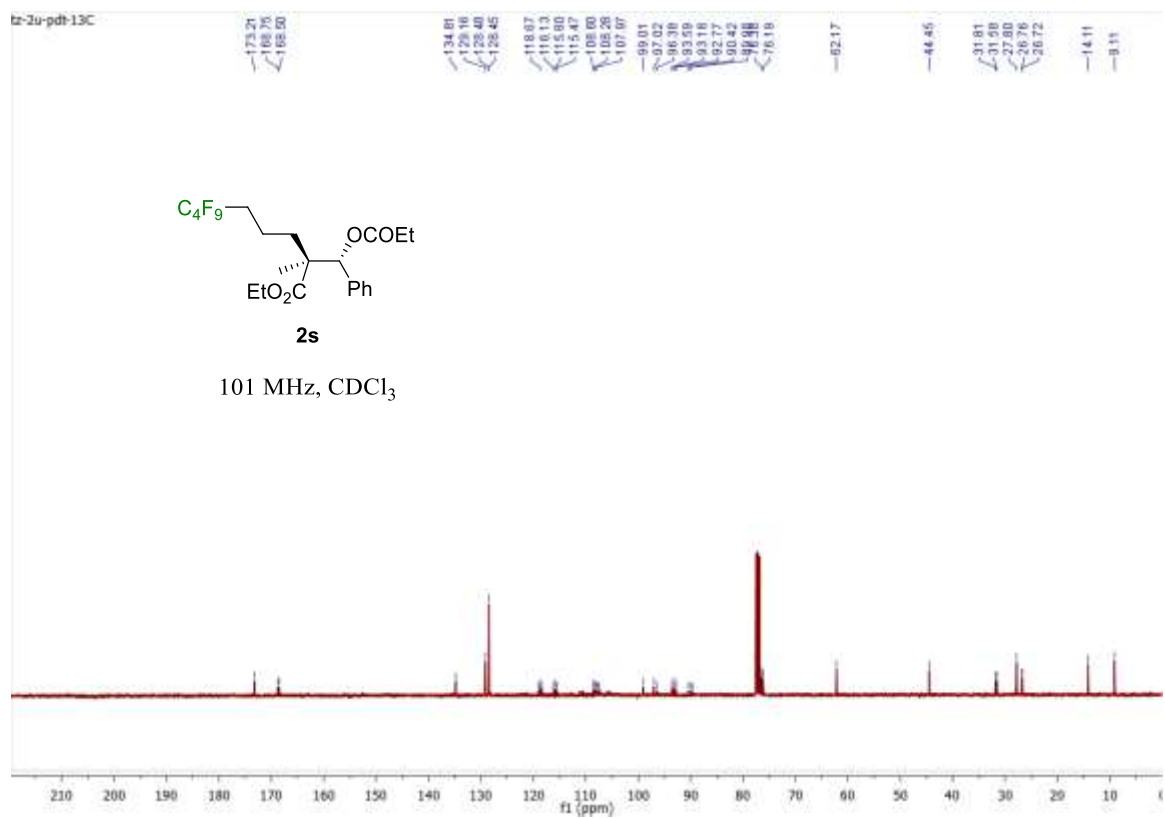

tz20200809-rec.pdf

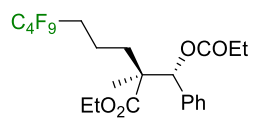

**2s**

376 MHz, CDCl<sub>3</sub>

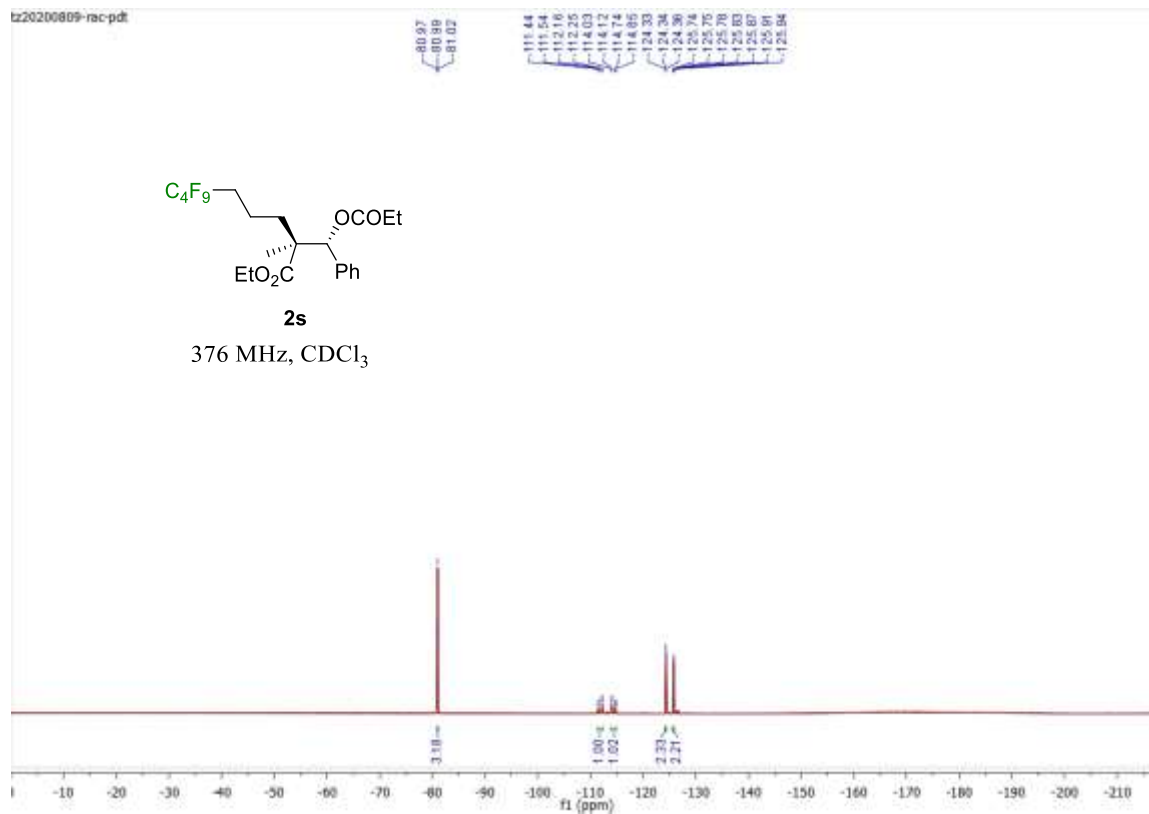

7.3105  
7.3105  
7.3105  
7.3135  
7.3135  
7.3135  
6.1205  
6.0958  
5.8135  
5.8034  
5.7997  
5.7951  
5.7895  
5.7843  
5.7818  
5.7760  
5.7724  
5.7682  
5.7621  
5.7561  
5.7482  
5.7442  
5.7444  
5.1690  
5.1470  
4.1041  
4.1222  
4.1161  
4.1103  
4.1043  
4.0983  
4.0923  
4.0785  
4.0725  
4.0666  
4.0606  
4.0547  
4.0487  
4.0388  
2.8191  
2.8057  
2.7978  
2.7915  
2.7838  
2.7815  
2.7794  
2.7760  
2.7738  
2.7675  
2.7617  
2.7571  
2.6934  
2.6835  
2.6652  
2.6514  
2.6411  
2.6272  
2.4934  
2.4708  
2.4684  
2.4657  
2.4432  
2.4310  
2.4180  
2.4060  
2.4034  
2.4038  
2.3908  
1.5711  
1.5685  
1.5457  
1.5443  
1.5324  
1.5205

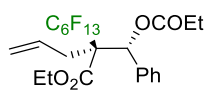

**2t**

600 MHz, CDCl<sub>3</sub>

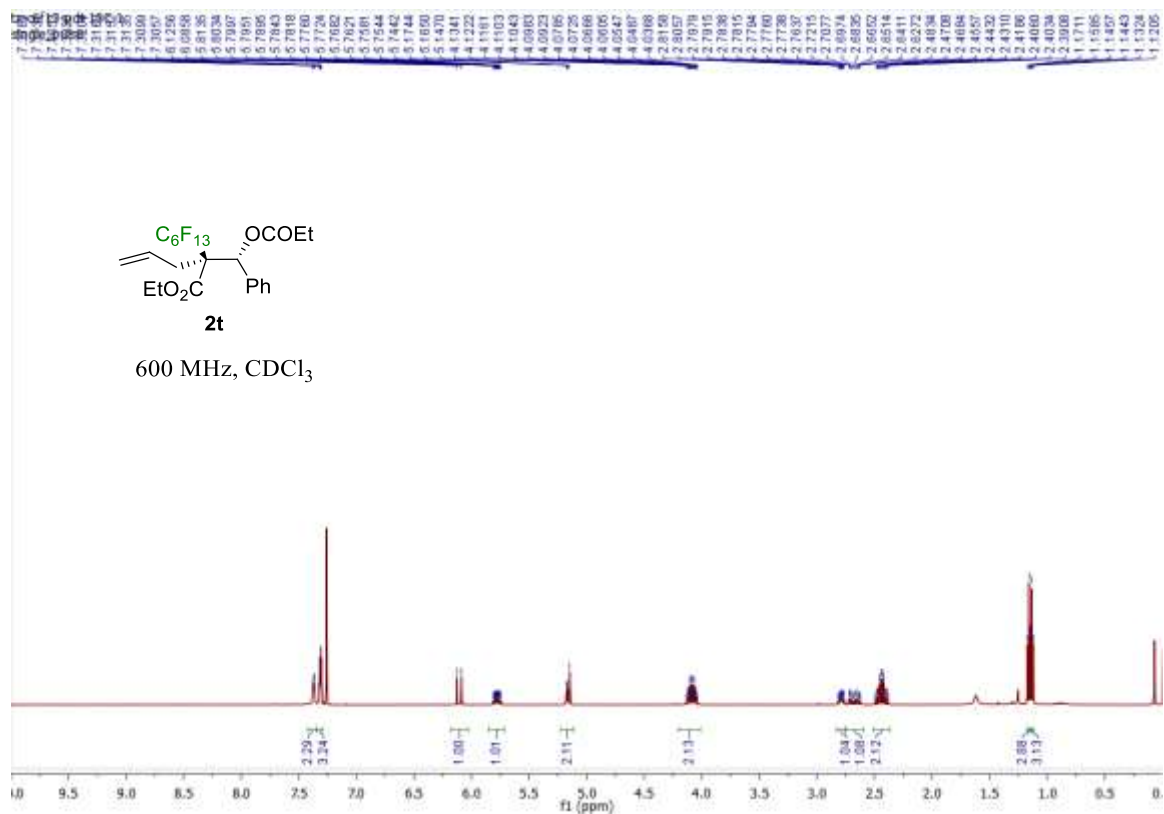

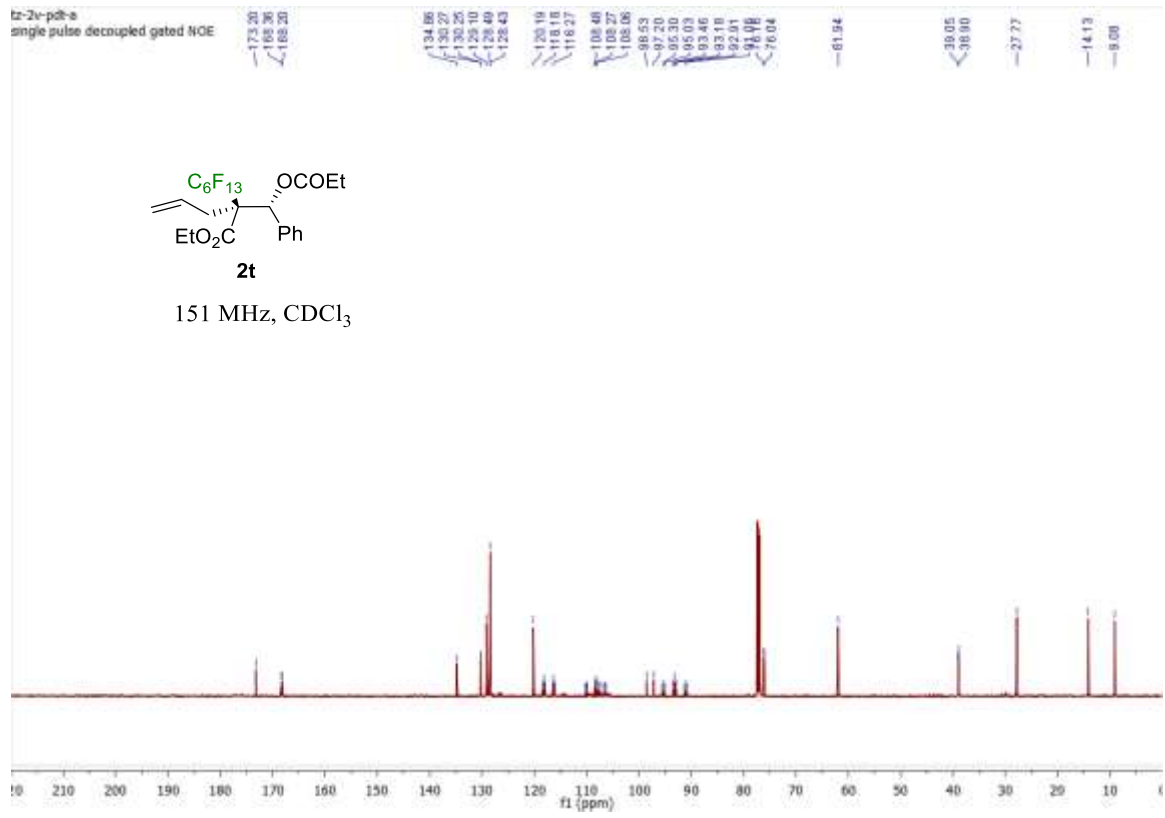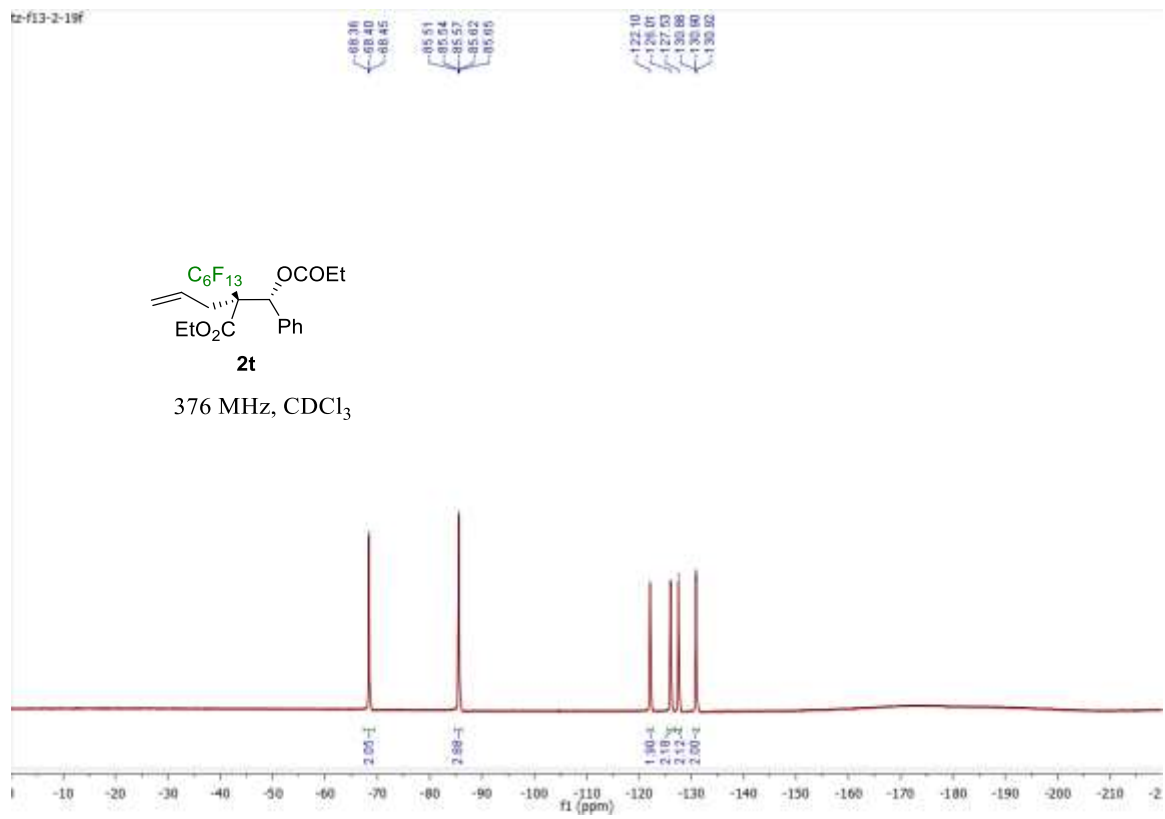

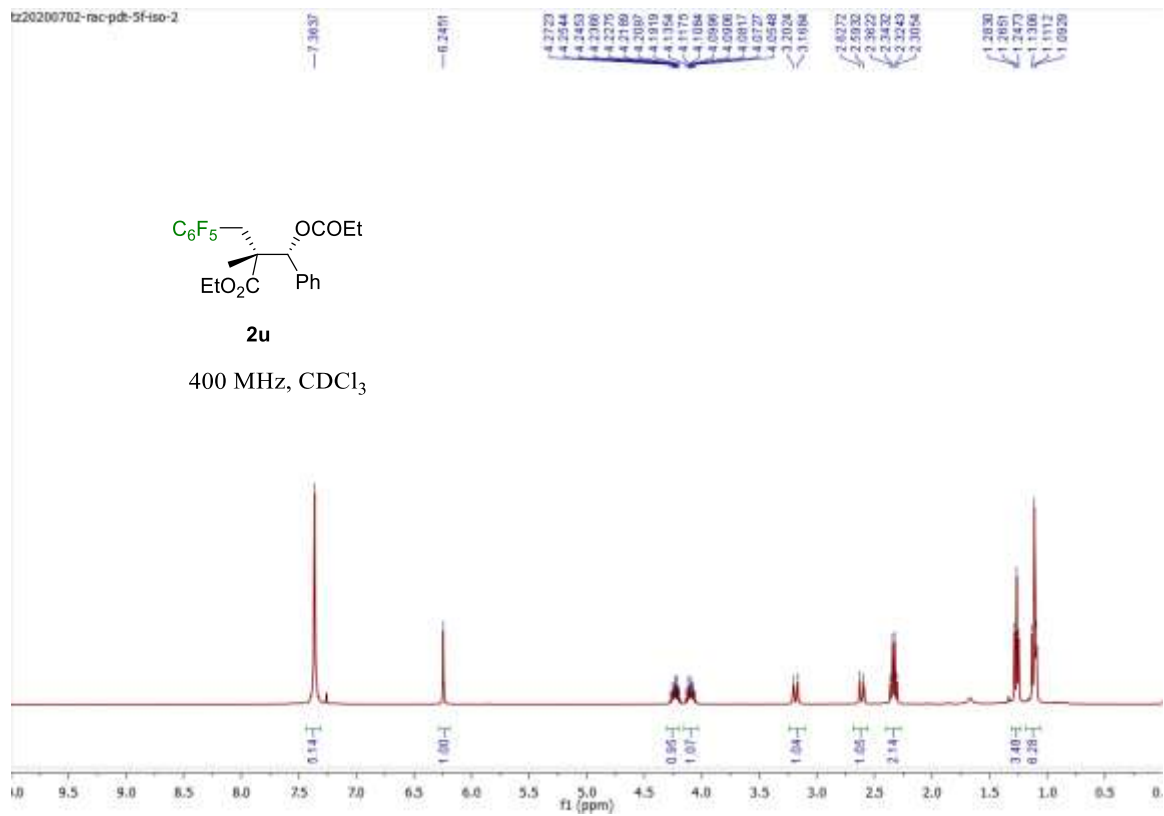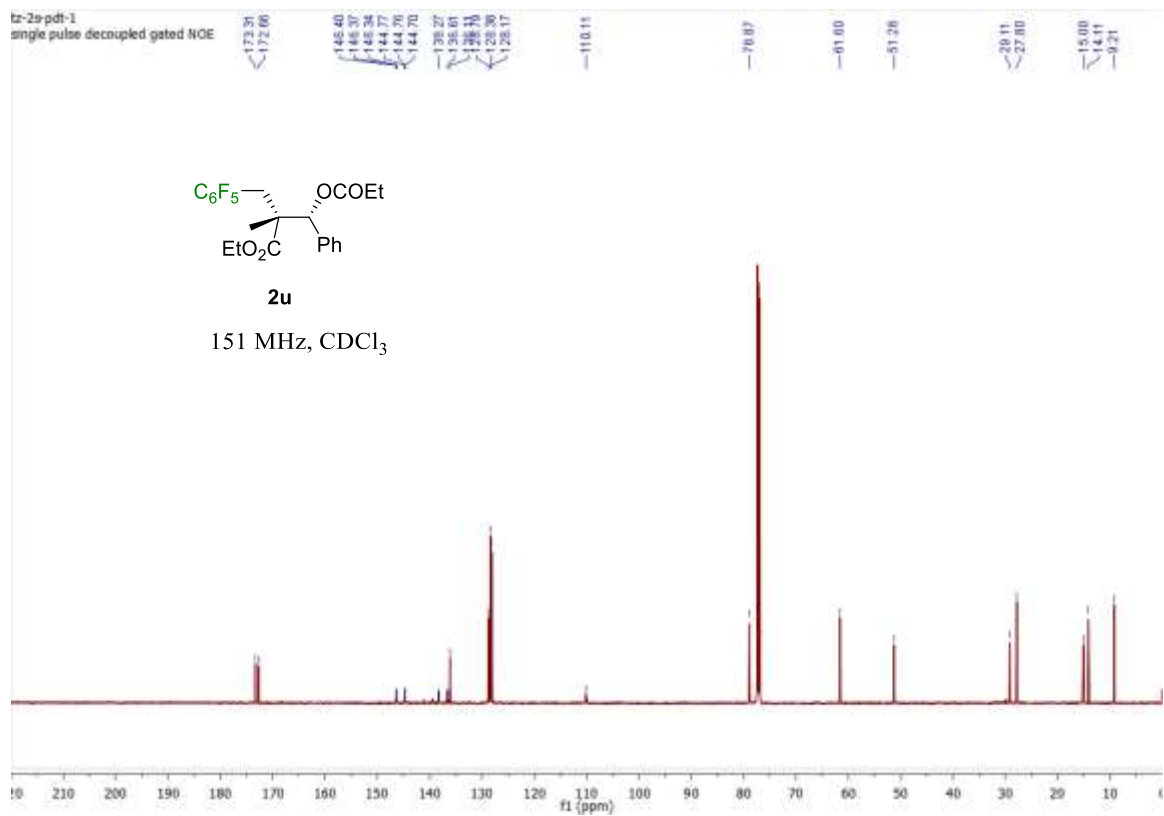

tz20200702-rac-pdt-Sf-iso-2

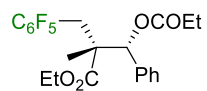

**2u**

376 MHz, CDCl<sub>3</sub>

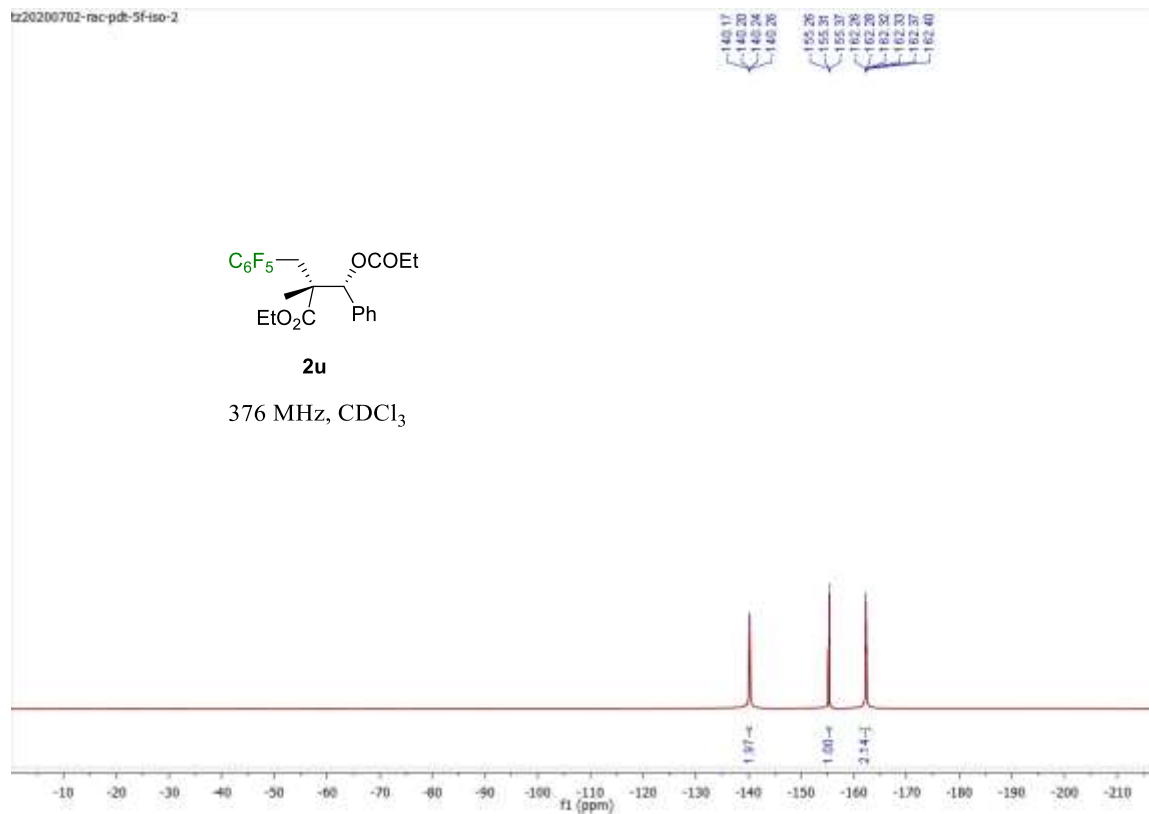

tz20200707-Sf-iso-1-rac-pdt

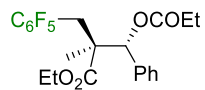

**2v**

400 MHz, CDCl<sub>3</sub>

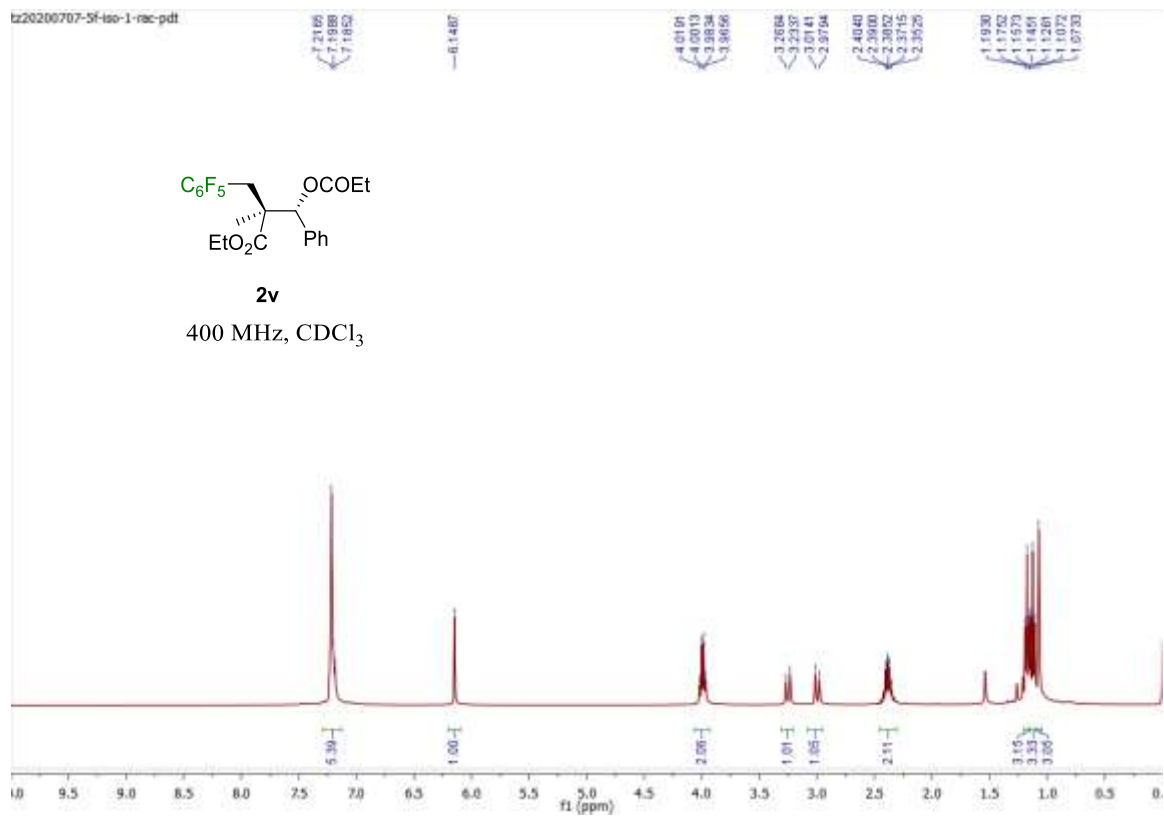

tz-5f-iso-1-pdt  
single pulse decoupled gated NOE

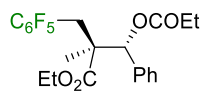

**2v**

151 MHz, CDCl<sub>3</sub>

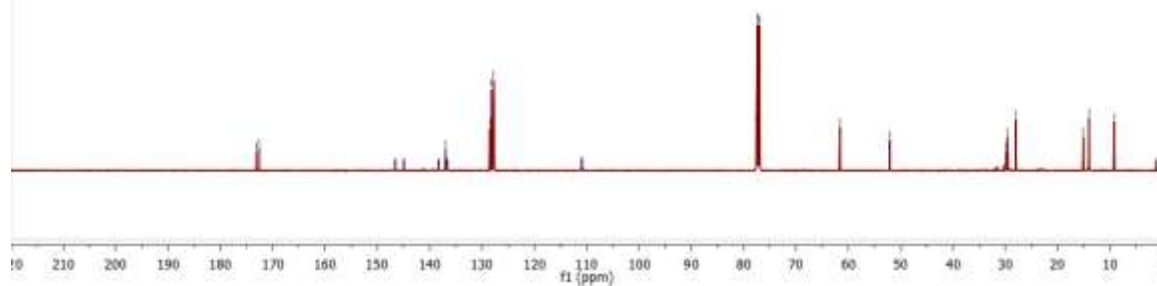

tz20200707-5f-iso-1-rac-pdt

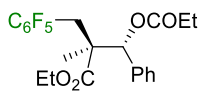

**2v**

376 MHz, CDCl<sub>3</sub>

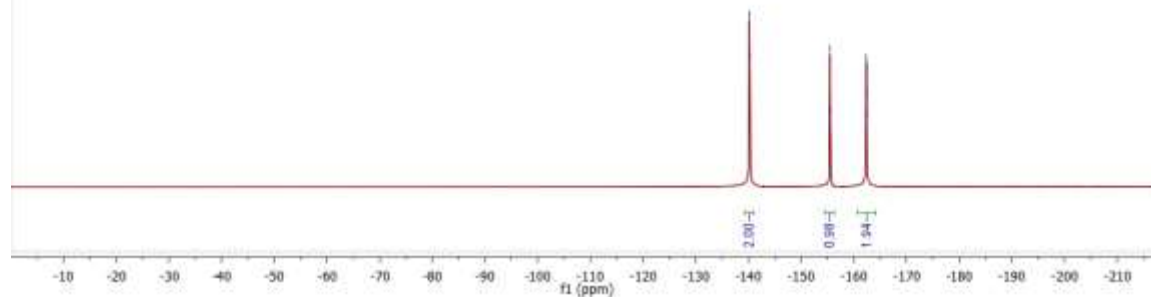



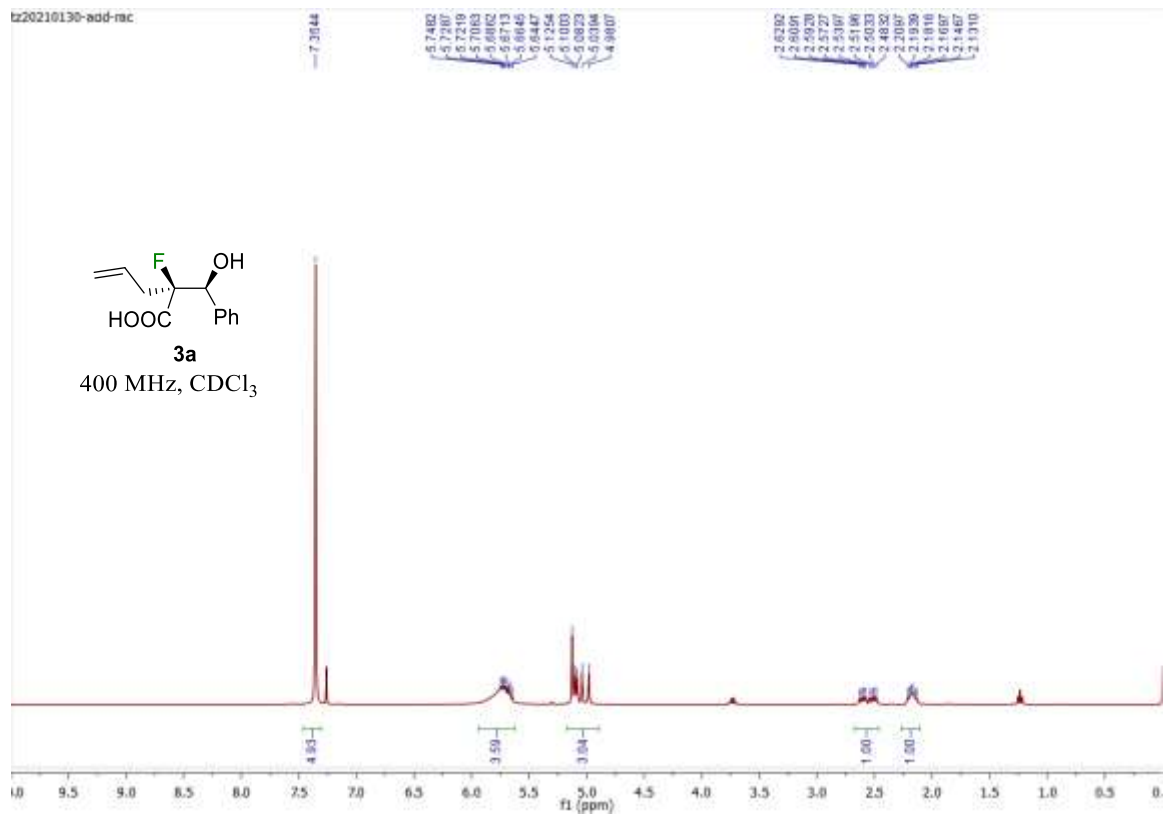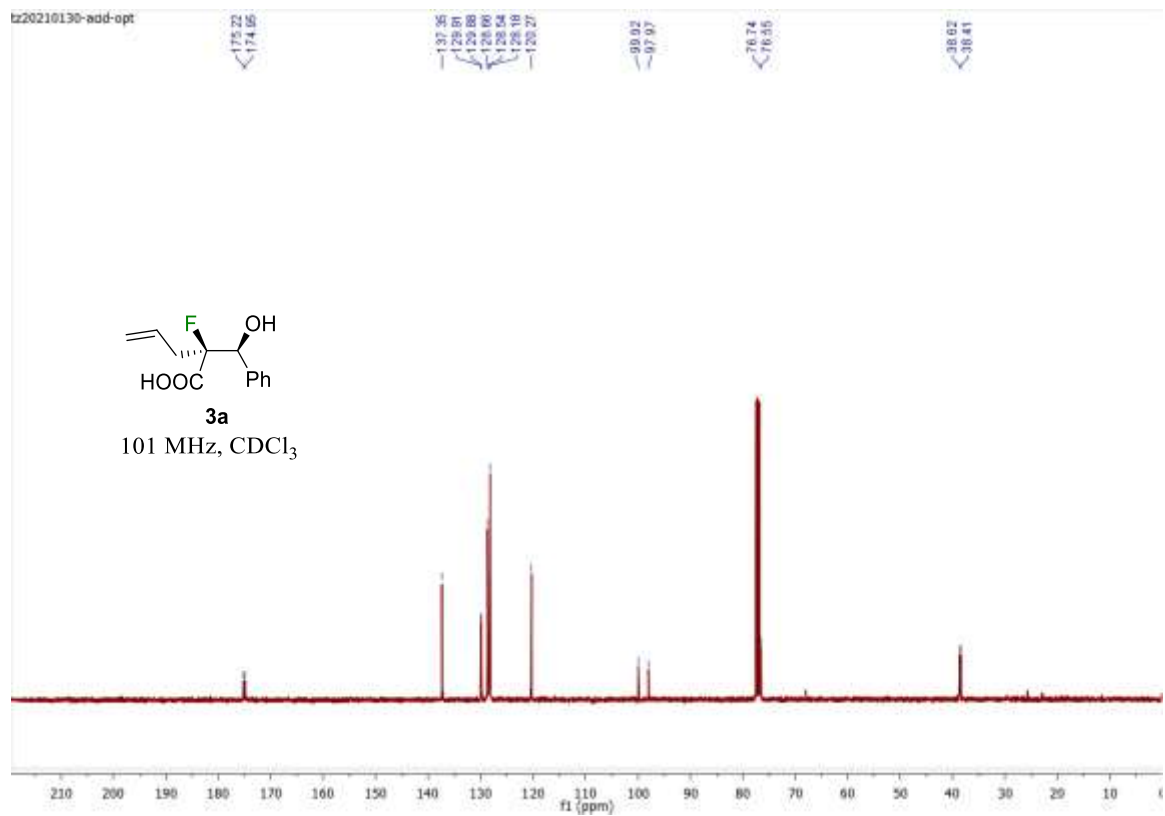

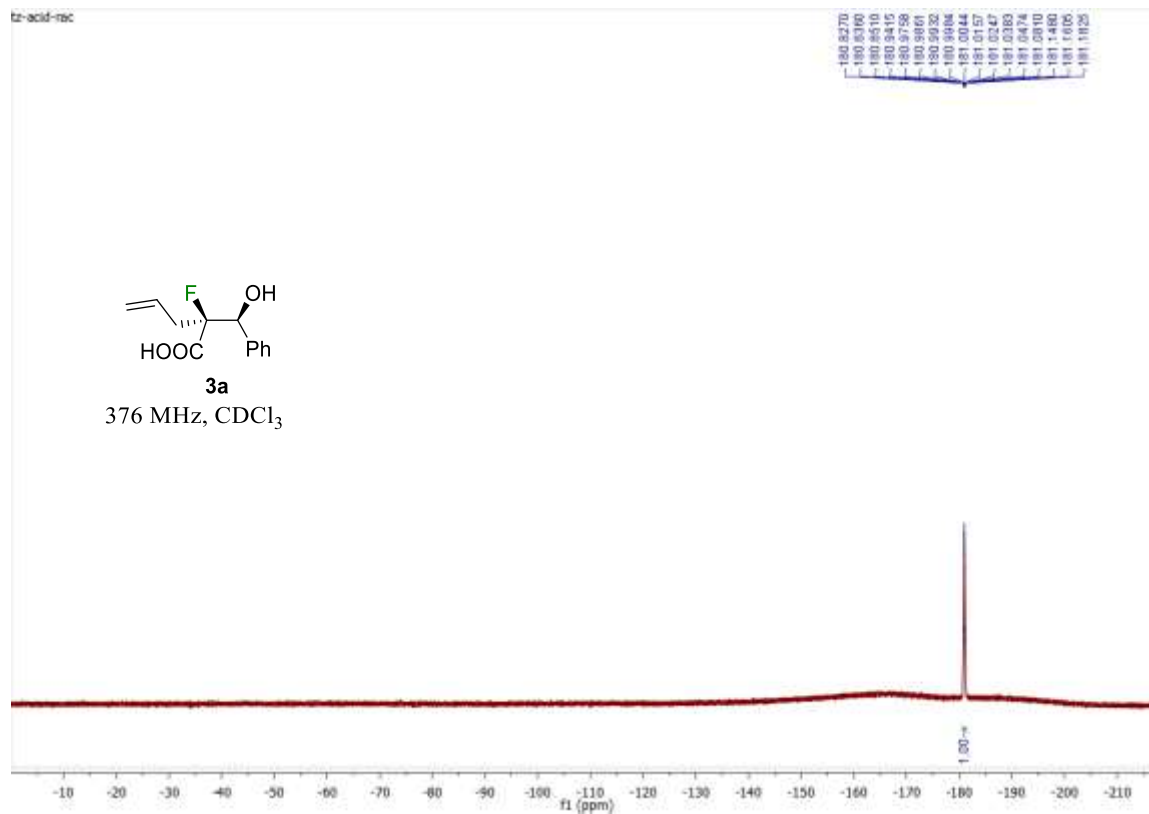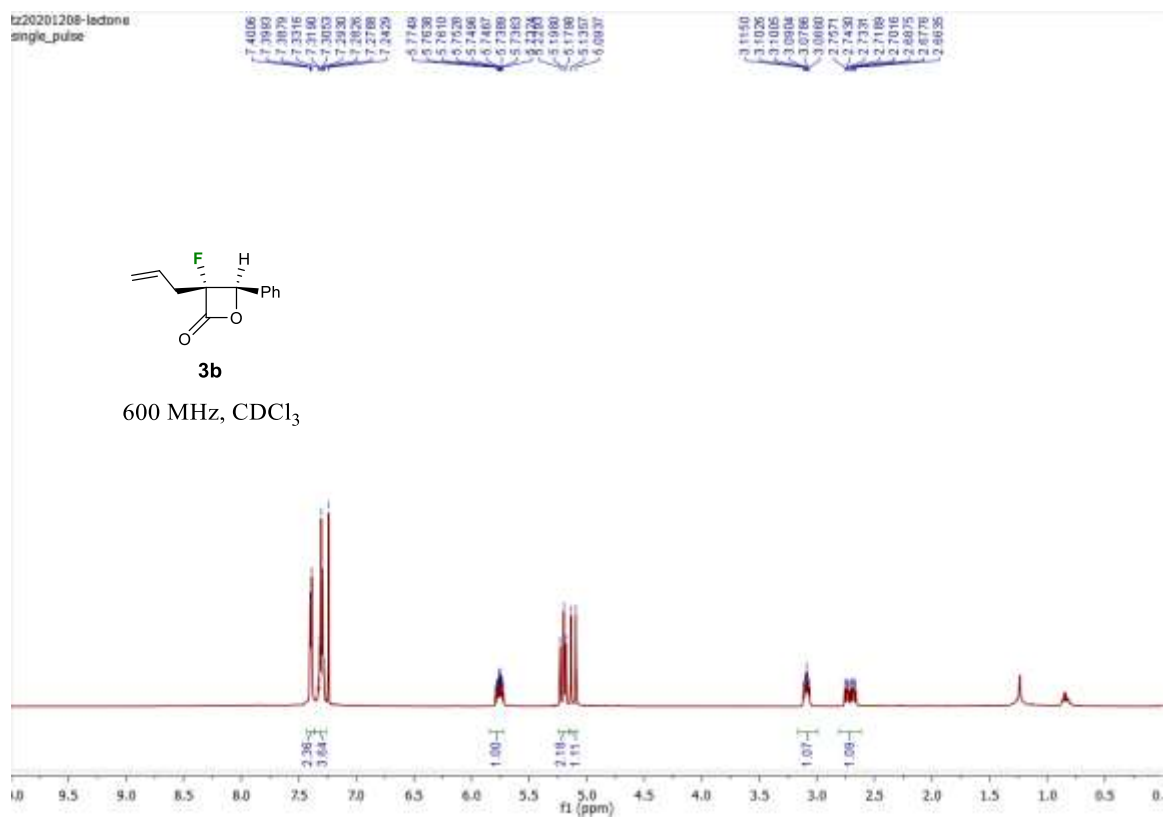

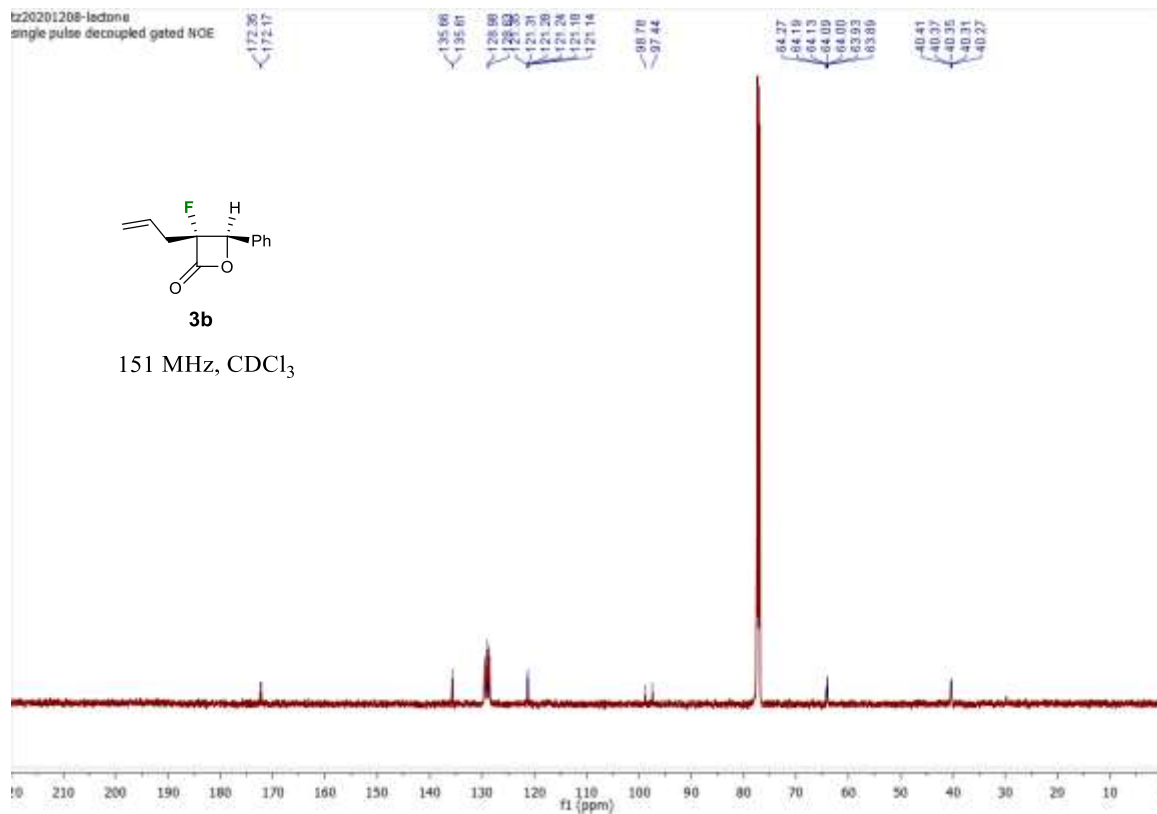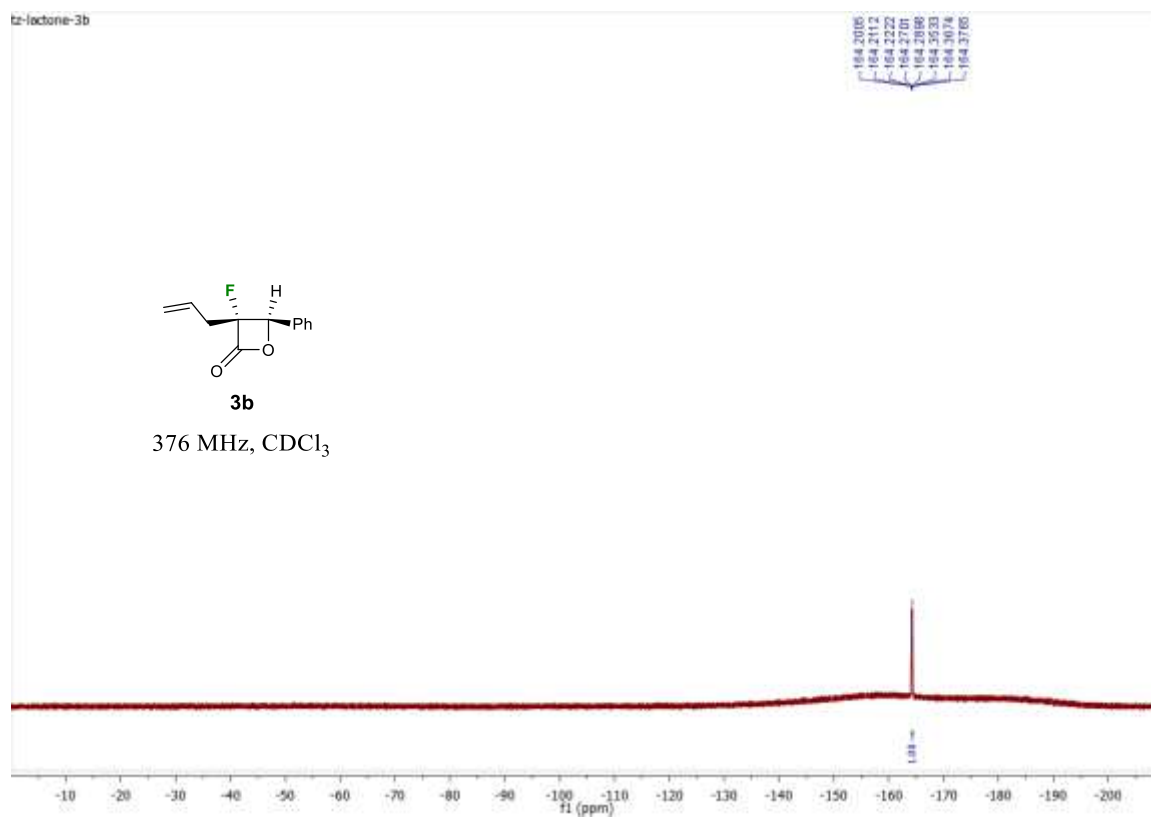

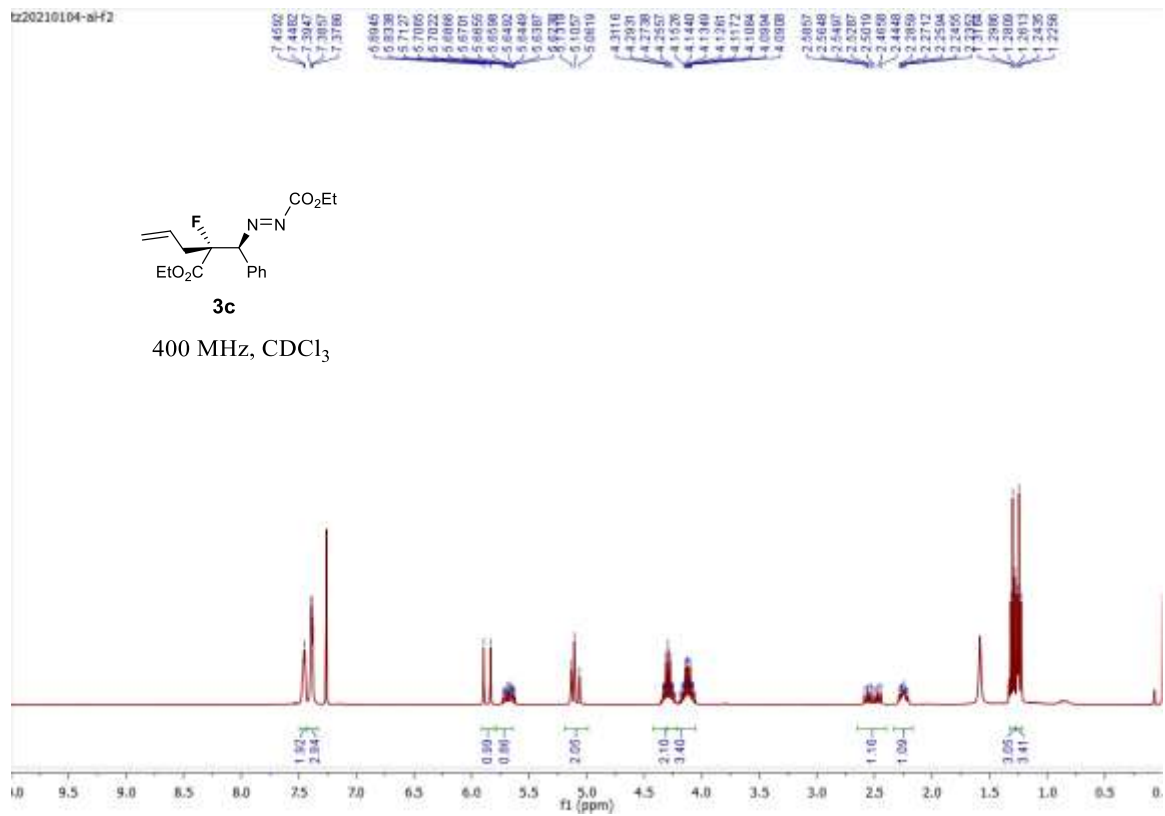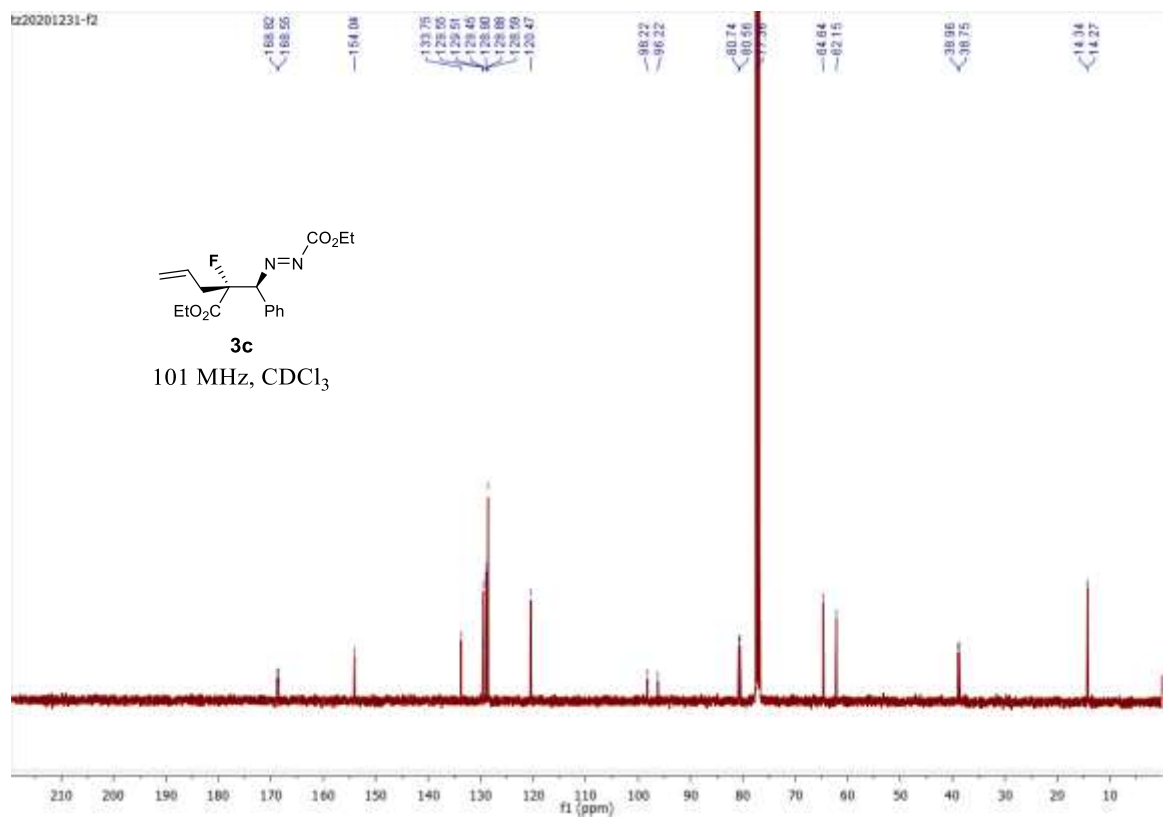

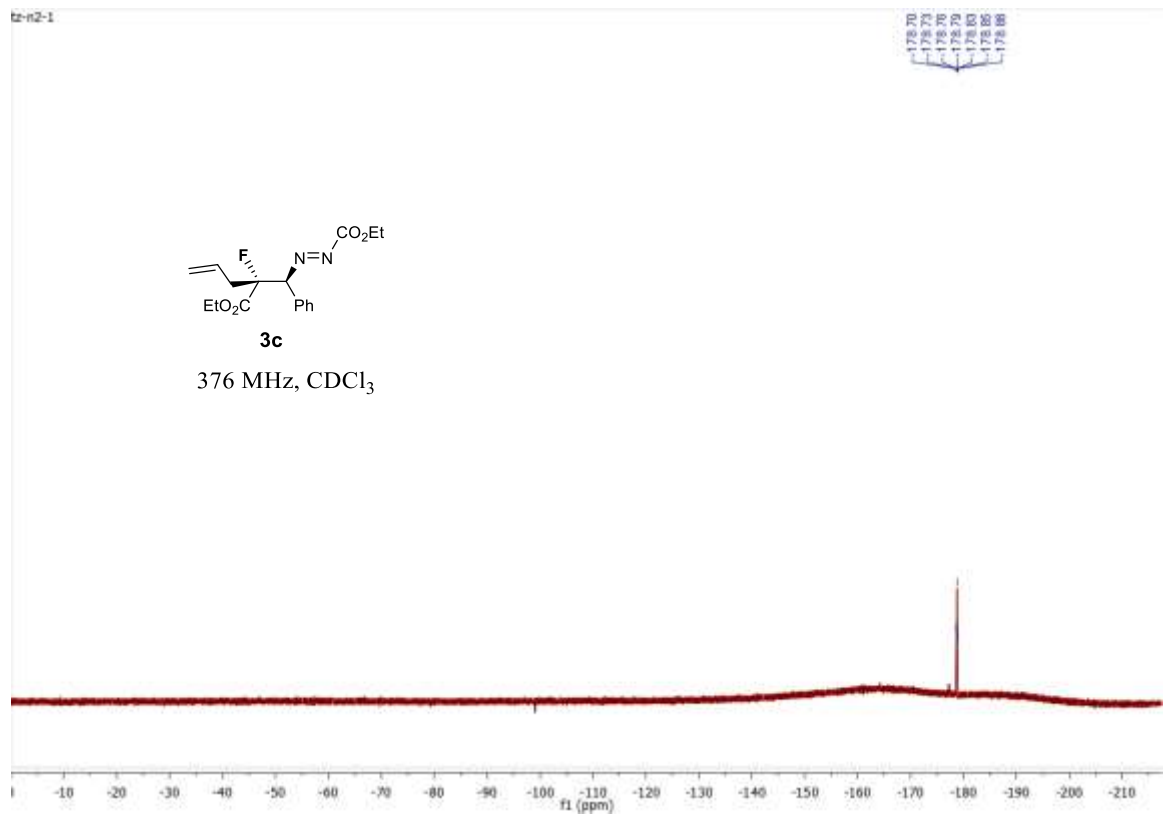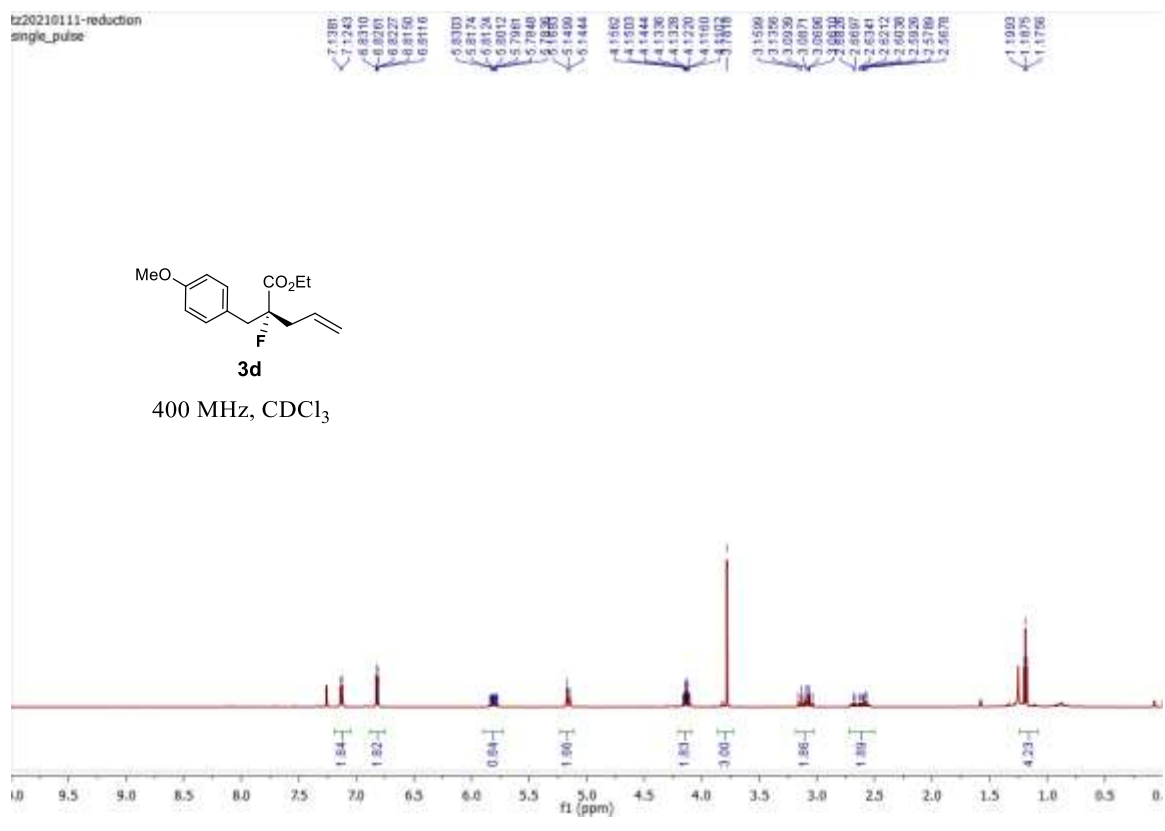

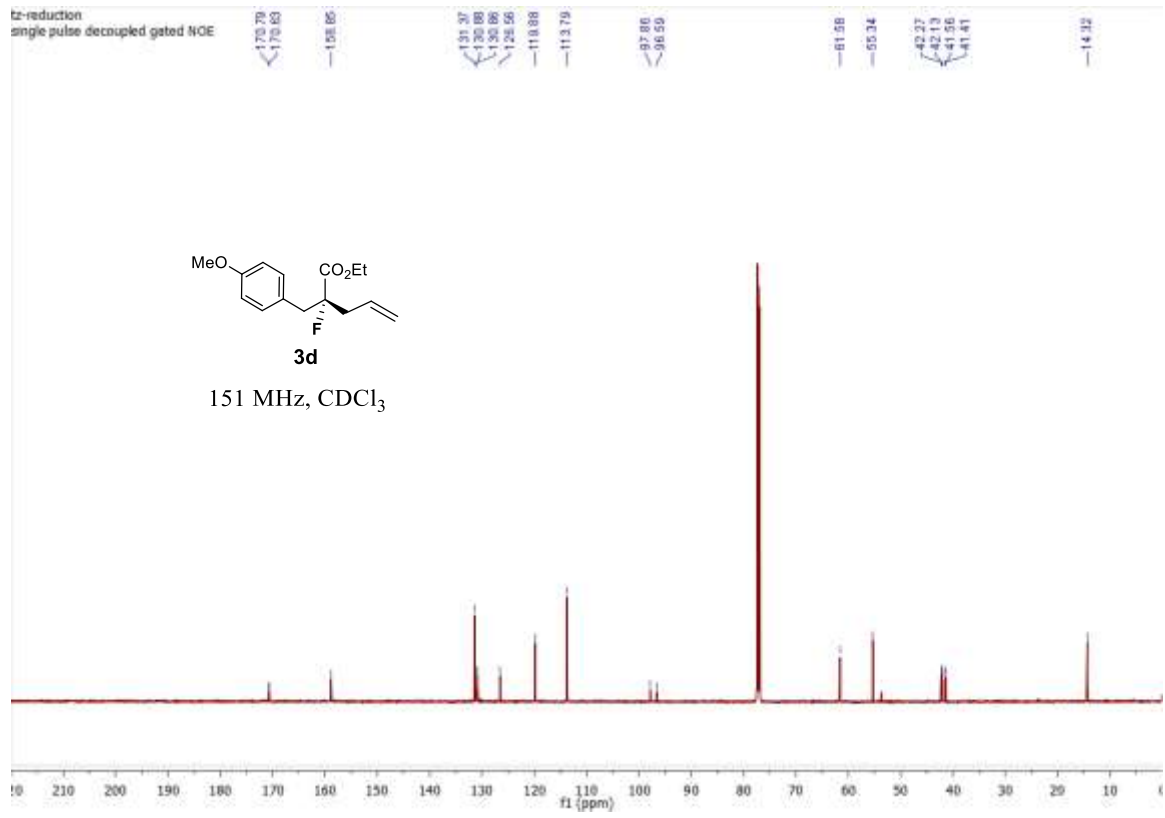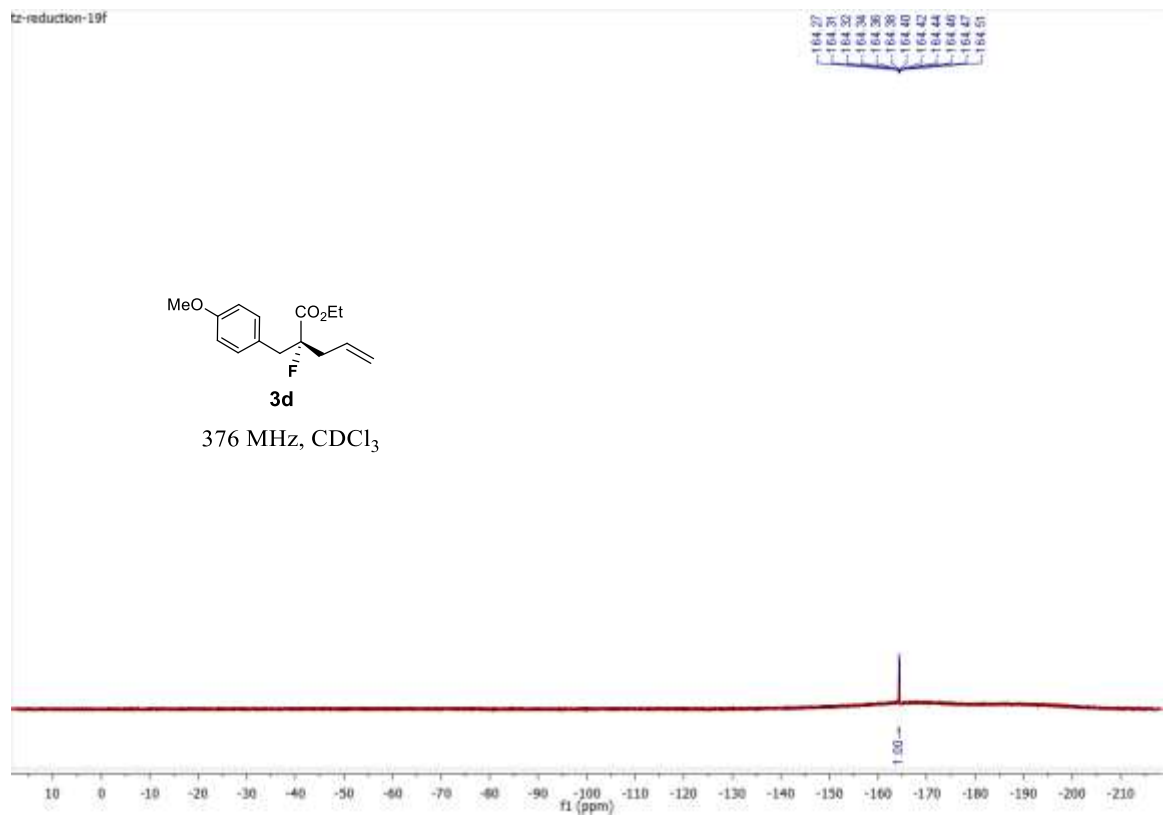

tz20201208-f1-epoxi 1  
single\_pulse

7.3934  
7.3917  
7.3566

4.4954  
4.4927  
4.4854  
4.1763  
4.1735  
4.1674  
4.1615  
4.1587  
4.1555  
4.1487  
4.1436  
4.1410  
4.1349  
4.1289  
4.1221  
4.1169

1.1245  
1.1175  
1.1065

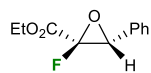

**3e**

600 MHz, CDCl<sub>3</sub>

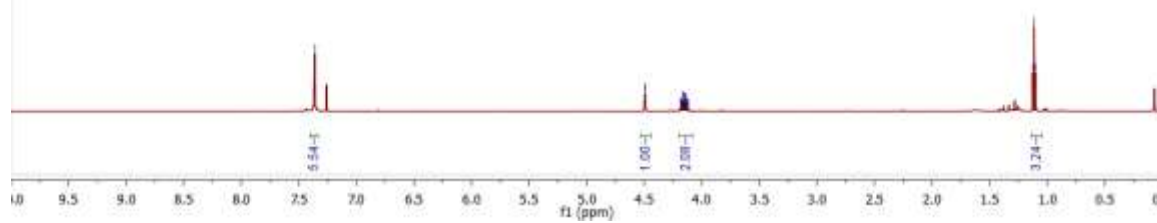

tz20201208-f1-epoxi 1  
single pulse decoupled gated NCE

161.93  
161.96

126.91  
126.37  
126.25  
126.37  
126.62

93.48  
91.04

62.87

13.86

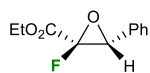

**3e**

151 MHz, CDCl<sub>3</sub>

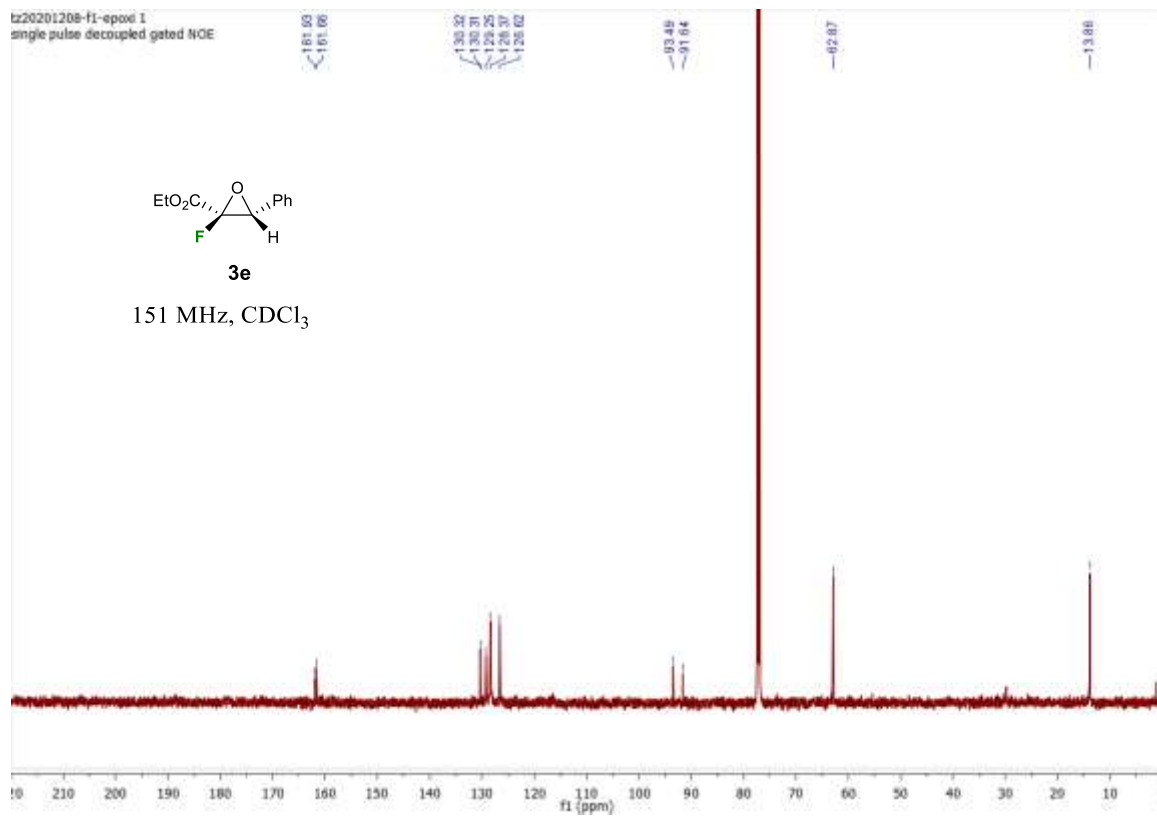





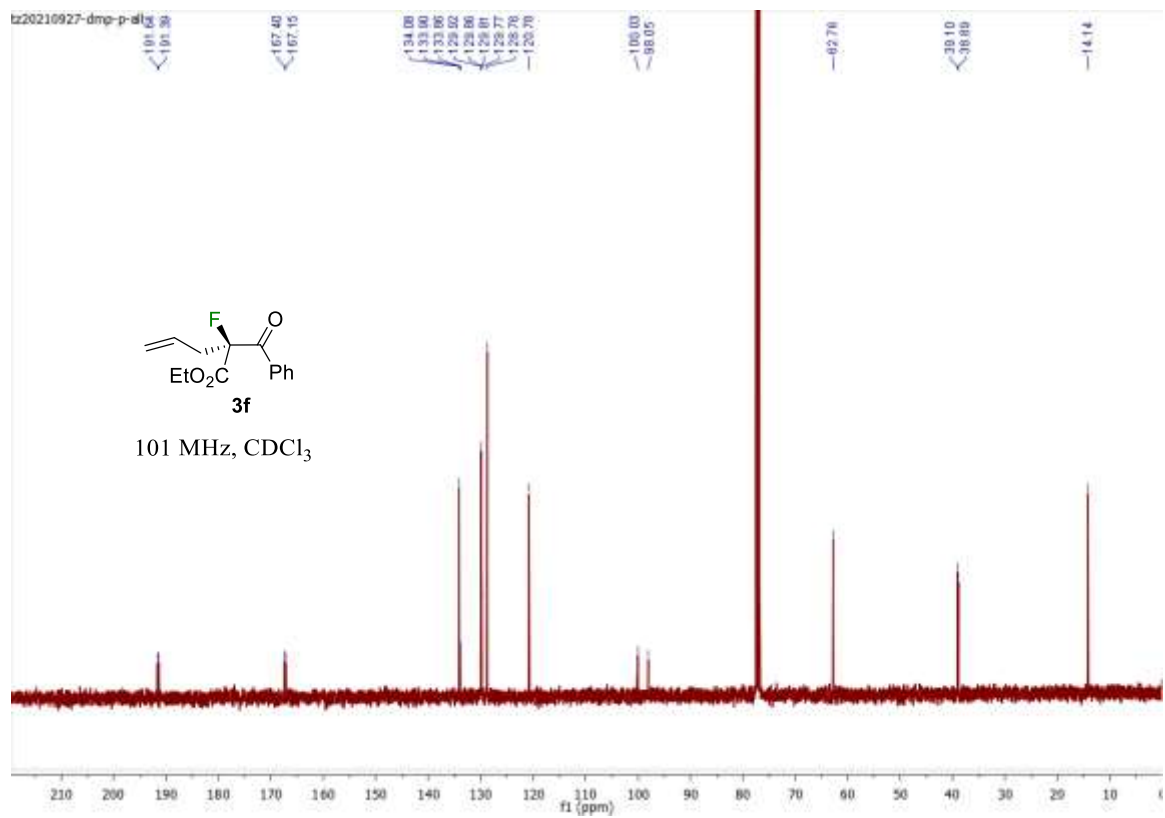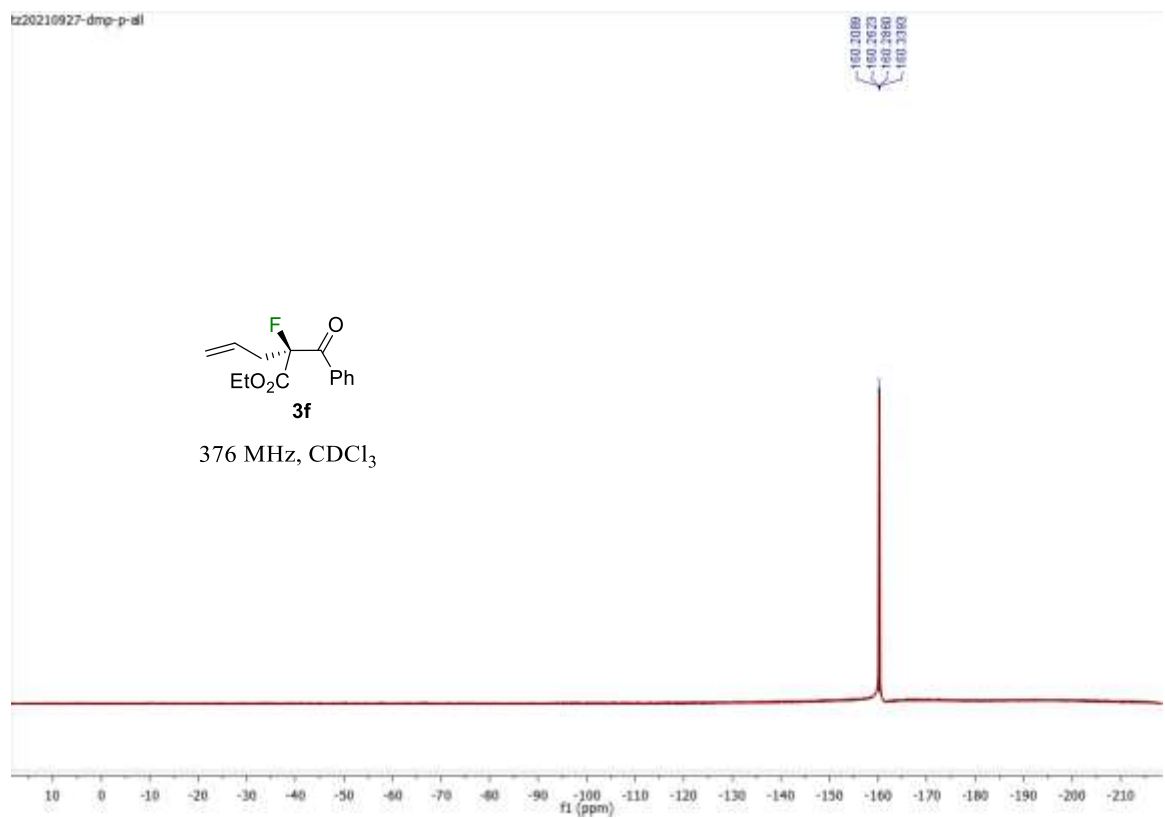

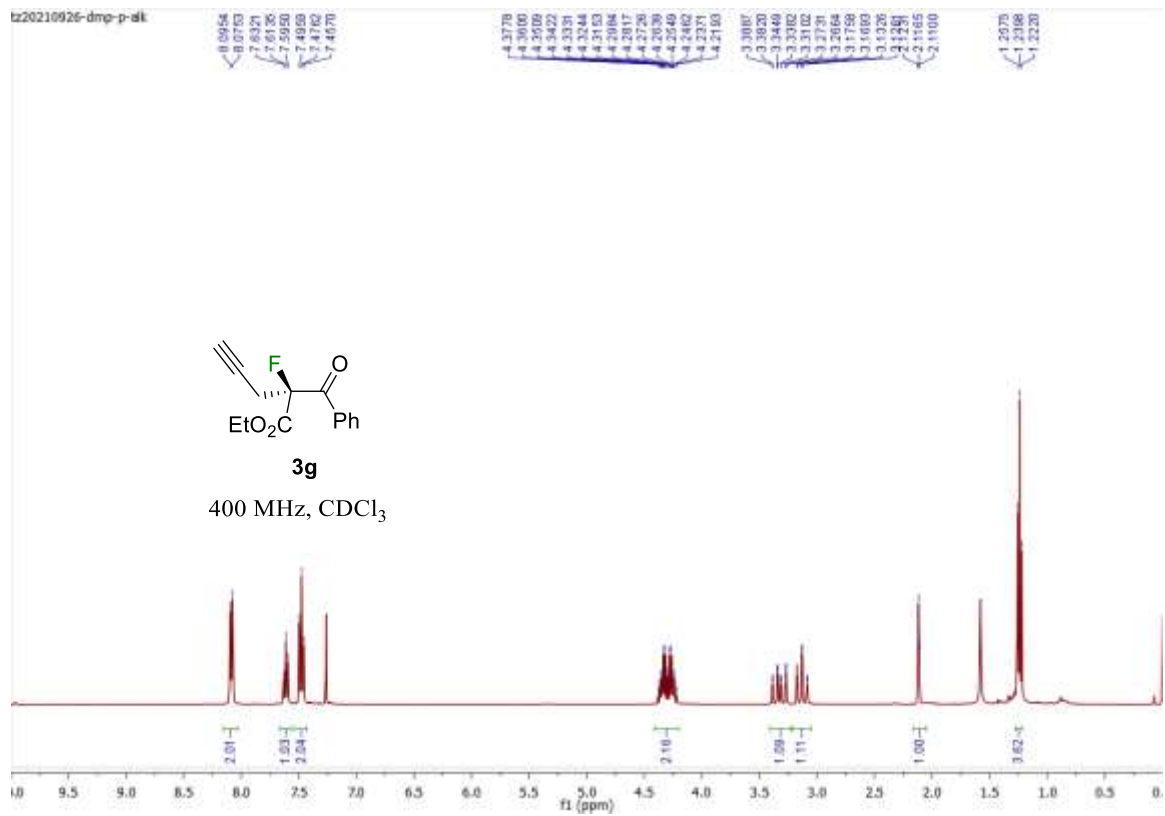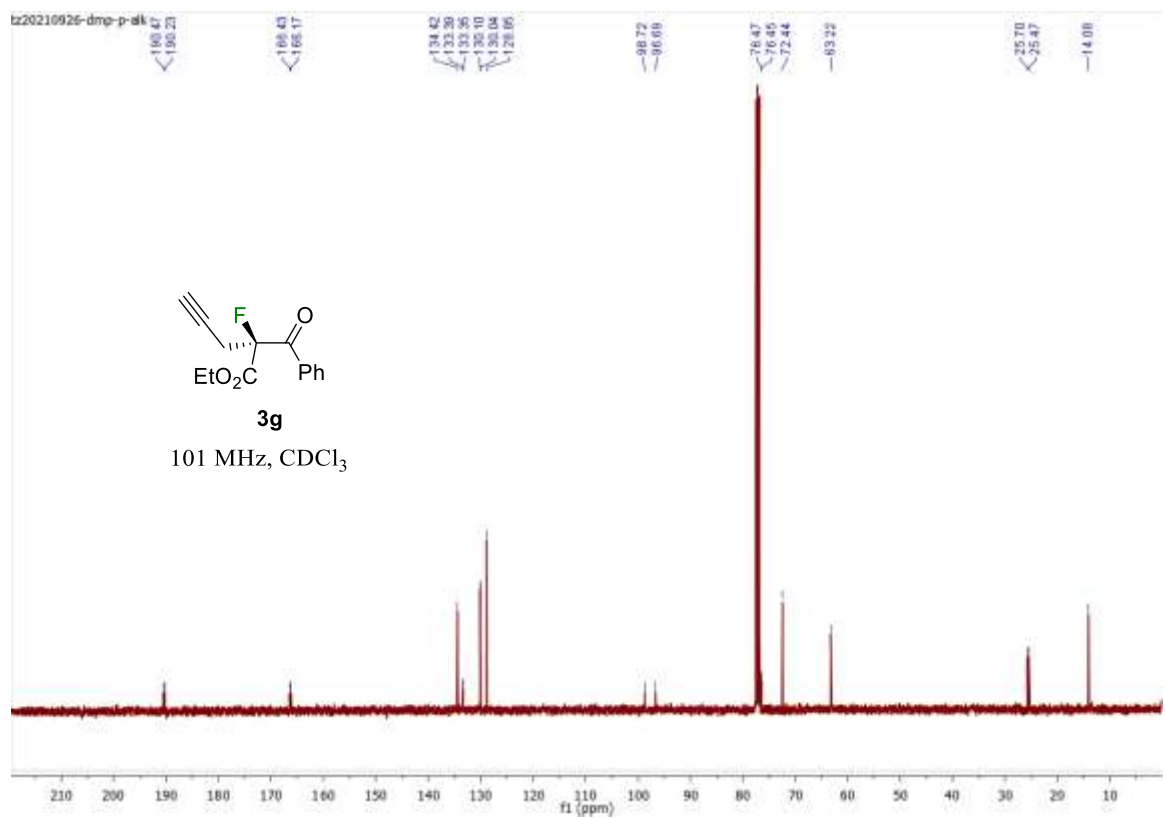

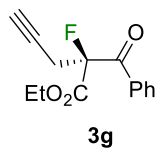376 MHz, CDCl<sub>3</sub>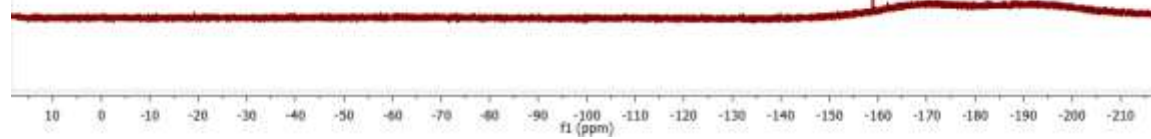

### VIII. HPLC spectra for *ee* determination.

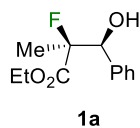

#### <Chromatogram>

mV

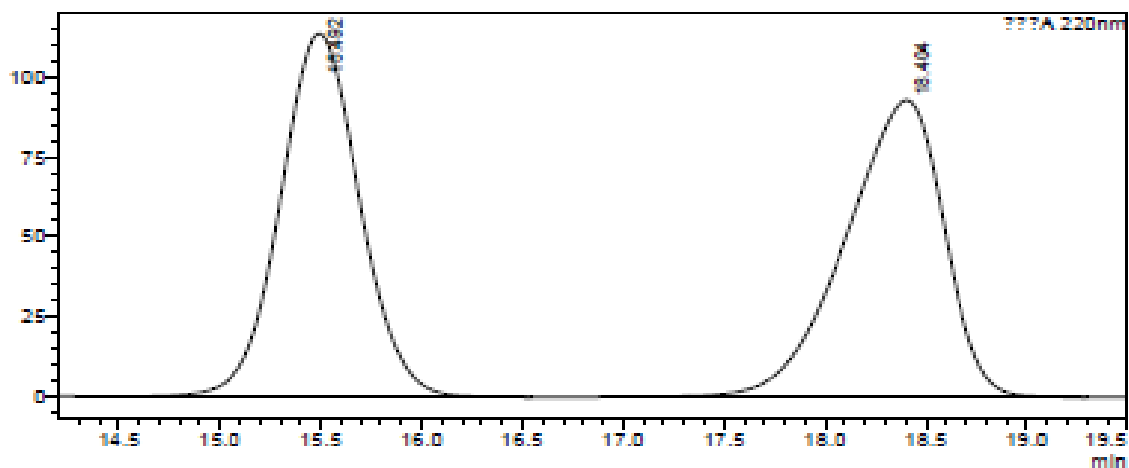

#### <Peak Table>

???A 220nm

| Peak# | Ret. Time | Area    | Height | Conc.  | Unit | Mark | Name |
|-------|-----------|---------|--------|--------|------|------|------|
| 1     | 15.492    | 3115010 | 113822 | 49.796 |      |      |      |
| 2     | 18.404    | 3140571 | 92903  | 50.204 |      |      |      |
| Total |           | 6255581 | 206725 |        |      |      |      |

#### <Chromatogram>

mV

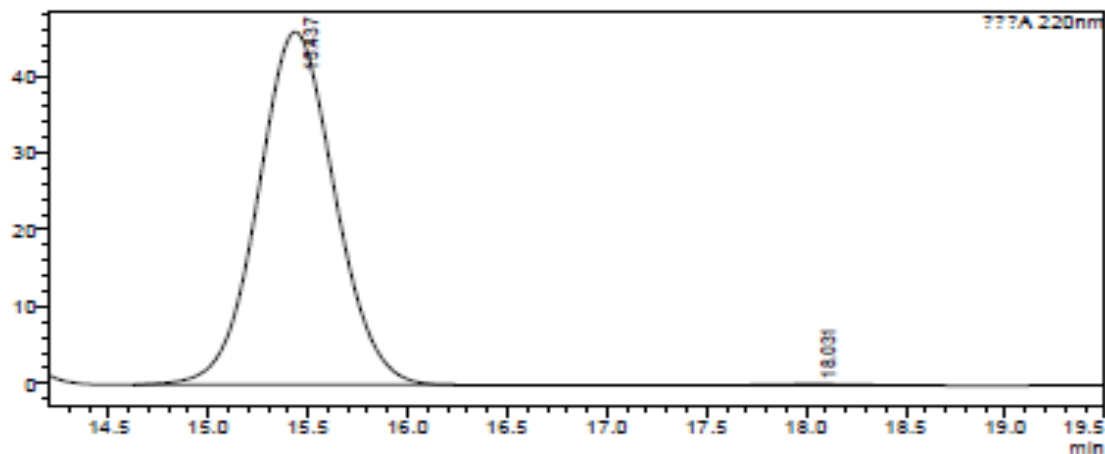

#### <Peak Table>

???A 220nm

| Peak# | Ret. Time | Area    | Height | Conc.  | Unit | Mark | Name |
|-------|-----------|---------|--------|--------|------|------|------|
| 1     | 15.437    | 1228237 | 45871  | 99.660 |      | M    |      |
| 2     | 18.031    | 4191    | 156    | 0.340  |      |      |      |
| Total |           | 1232429 | 46027  |        |      |      |      |

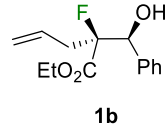

**<Chromatogram>**

mV

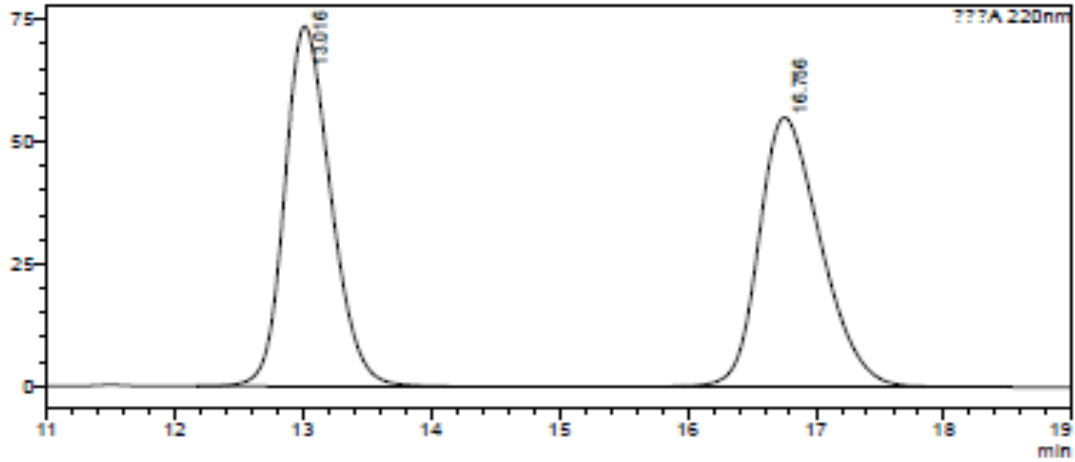

**<Peak Table>**

??A 220nm

| Peak# | Ret. Time | Area    | Height | Conc.  | Unit | Mark | Name |
|-------|-----------|---------|--------|--------|------|------|------|
| 1     | 13.016    | 1848570 | 73765  | 50.103 |      |      |      |
| 2     | 16.756    | 1840954 | 55139  | 49.897 |      |      |      |
| Total |           | 3689524 | 128903 |        |      |      |      |

**<Chromatogram>**

mV

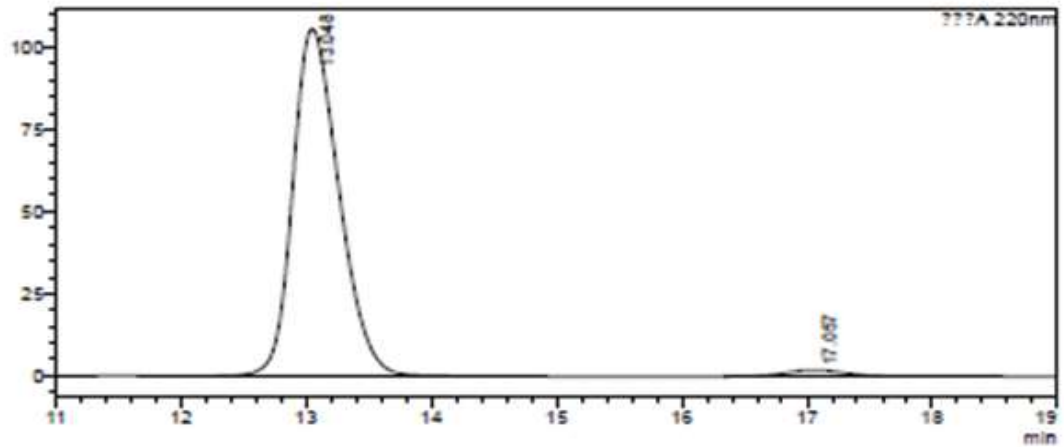

**<Peak Table>**

??A 220nm

| Peak# | Ret. Time | Area    | Height | Conc.  | Unit | Mark | Name |
|-------|-----------|---------|--------|--------|------|------|------|
| 1     | 13.048    | 2707295 | 105650 | 97.898 |      |      |      |
| 2     | 17.057    | 58142   | 1889   | 2.102  |      |      |      |
| Total |           | 2765437 | 107540 |        |      |      |      |

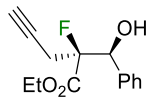

1c

<Chromatogram>

mV

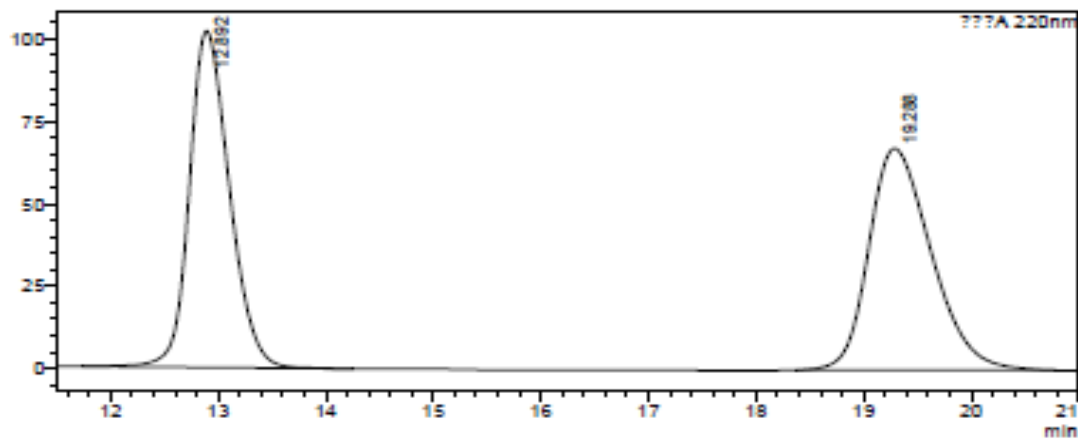

<Peak Table>

???A 220nm

| Peak# | Ret. Time | Area    | Height | Conc.  | Unit | Mark | Name |
|-------|-----------|---------|--------|--------|------|------|------|
| 1     | 12.892    | 2643872 | 102086 | 49.374 |      |      |      |
| 2     | 19.288    | 2710931 | 67255  | 50.626 |      | M    |      |
| Total |           | 5354804 | 169341 |        |      |      |      |

<Chromatogram>

mV

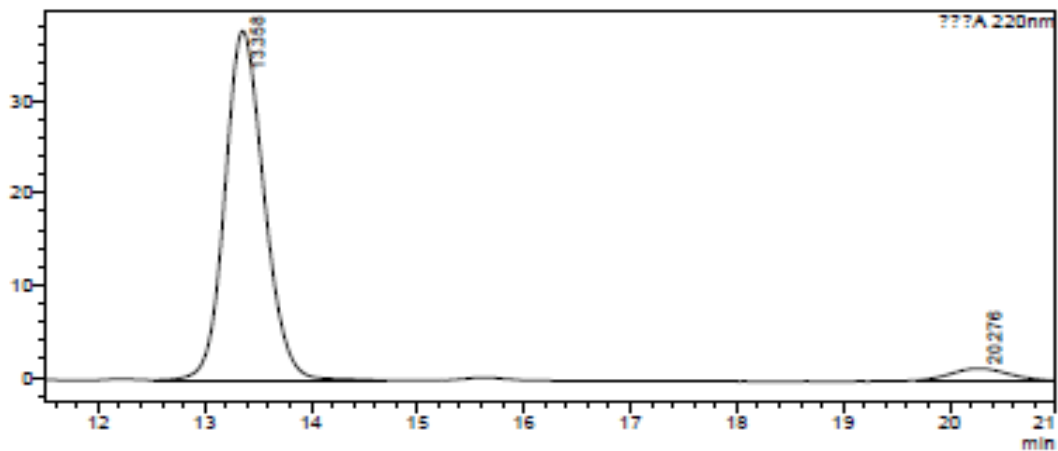

<Peak Table>

???A 220nm

| Peak# | Ret. Time | Area    | Height | Conc.  | Unit | Mark | Name |
|-------|-----------|---------|--------|--------|------|------|------|
| 1     | 13.358    | 967935  | 37844  | 95.387 |      |      |      |
| 2     | 20.276    | 46814   | 1292   | 4.613  |      | M    |      |
| Total |           | 1014749 | 39136  |        |      |      |      |

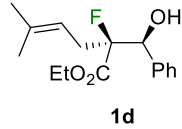

<Chromatogram>

mV

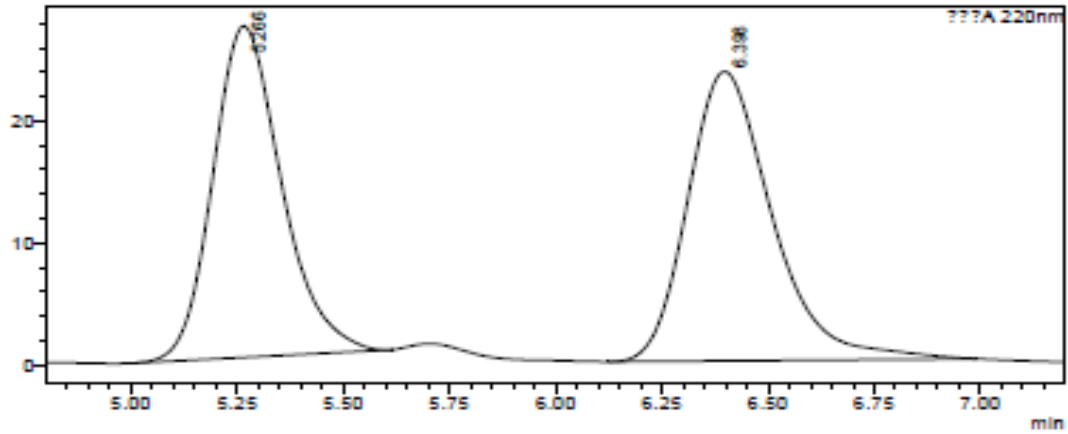

<Peak Table>

??A 220nm

| Peak# | Ret. Time | Area   | Height | Conc.  | Unit | Mark | Name |
|-------|-----------|--------|--------|--------|------|------|------|
| 1     | 5.266     | 306412 | 27210  | 48.280 |      | M    |      |
| 2     | 6.398     | 328245 | 23746  | 51.720 |      | M    |      |
| Total |           | 634656 | 50956  |        |      |      |      |

<Chromatogram>

mV

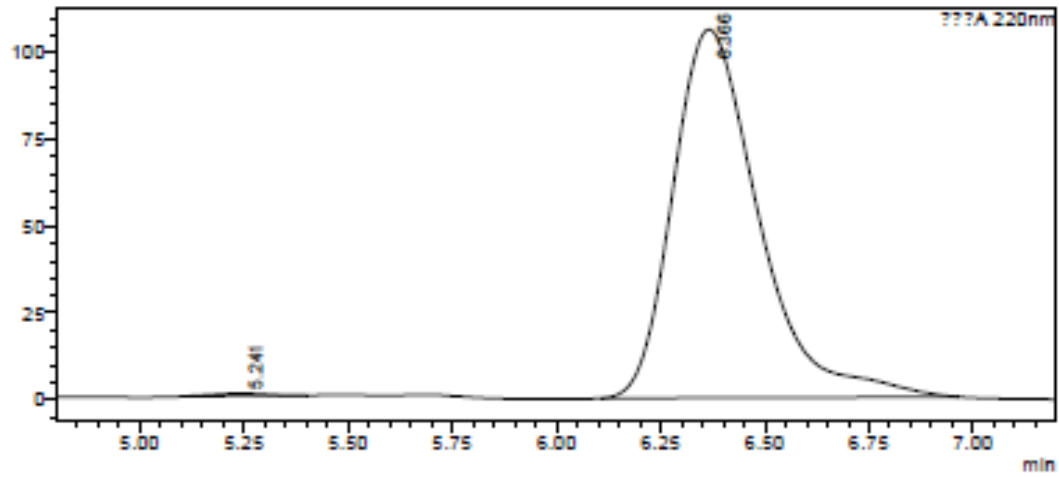

<Peak Table>

??A 220nm

| Peak# | Ret. Time | Area    | Height | Conc.  | Unit | Mark | Name |
|-------|-----------|---------|--------|--------|------|------|------|
| 1     | 5.241     | 5418    | 675    | 0.354  |      | M    |      |
| 2     | 6.366     | 1523460 | 106253 | 99.646 |      |      |      |
| Total |           | 1528878 | 106928 |        |      |      |      |

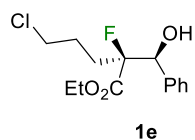

<Chromatogram>

mV

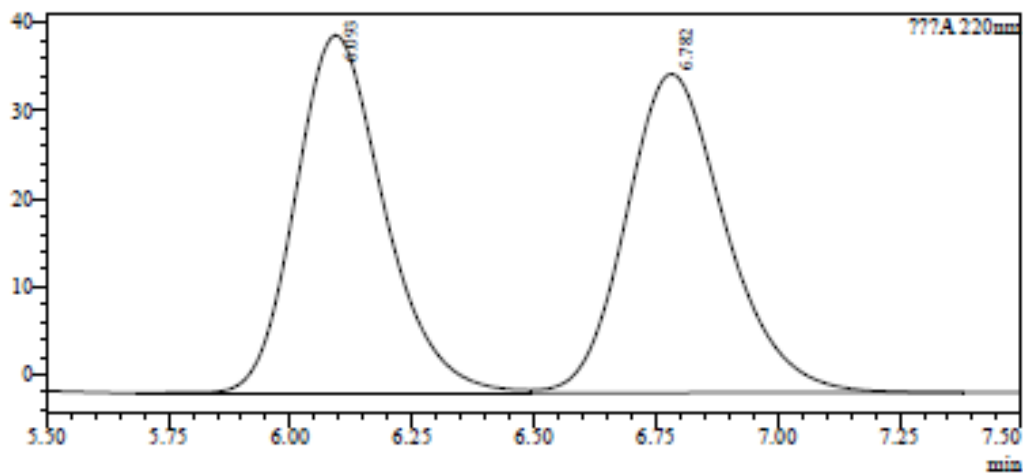

<Peak Table>

| Peak# | Ret. Time | Area    | Height | Conc.  | Unit | Mark | Name |
|-------|-----------|---------|--------|--------|------|------|------|
| 1     | 6.093     | 513689  | 40652  | 49.969 |      |      |      |
| 2     | 6.782     | 514319  | 36235  | 50.031 |      | V    |      |
| Total |           | 1028007 | 76887  |        |      |      |      |

<Chromatogram>

mV

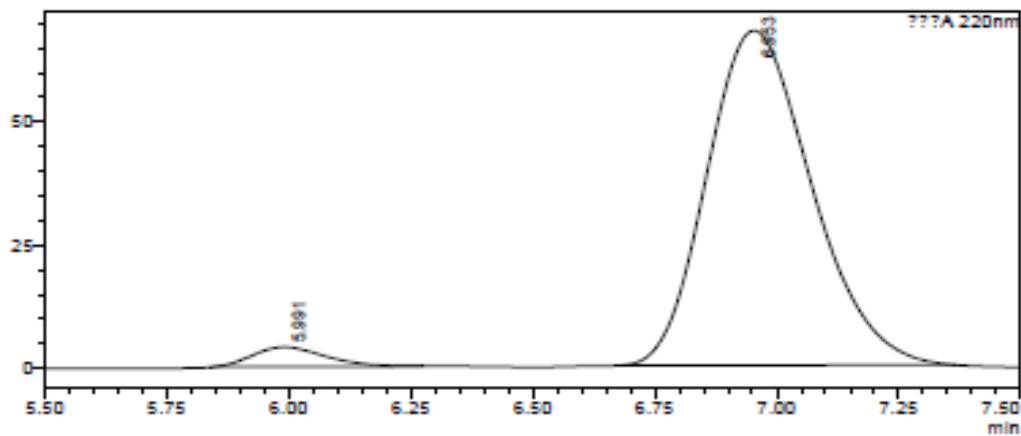

<Peak Table>

| Peak# | Ret. Time | Area    | Height | Conc.  | Unit | Mark | Name |
|-------|-----------|---------|--------|--------|------|------|------|
| 1     | 5.991     | 41215   | 4002   | 3.915  |      | M    |      |
| 2     | 6.953     | 1011460 | 67909  | 96.085 |      |      |      |
| Total |           | 1052675 | 71911  |        |      |      |      |



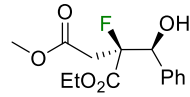

1f

<Chromatogram>

mV

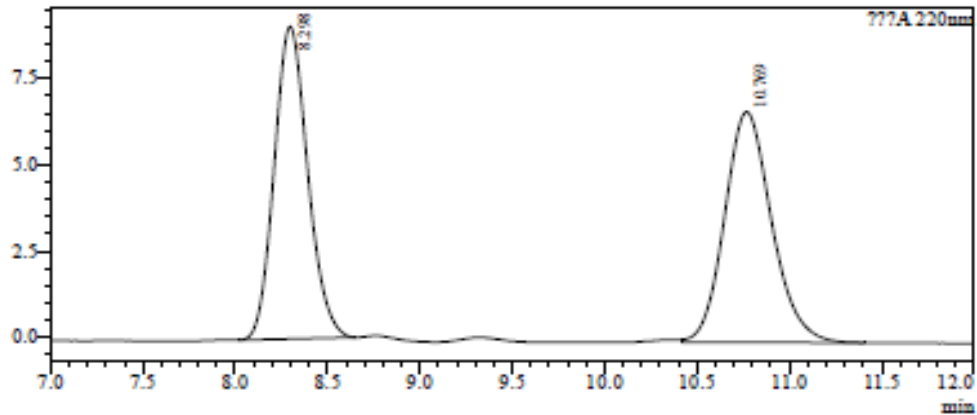

<Peak Table>

777A 220nm

| Peak# | Ret. Time | Area   | Height | Conc.  | Unit | Mark | Name |
|-------|-----------|--------|--------|--------|------|------|------|
| 1     | 8.298     | 114495 | 9052   | 49.167 |      |      |      |
| 2     | 10.769    | 118376 | 6680   | 50.833 |      | V    |      |
| Total |           | 232871 | 15732  |        |      |      |      |

<Chromatogram>

mV

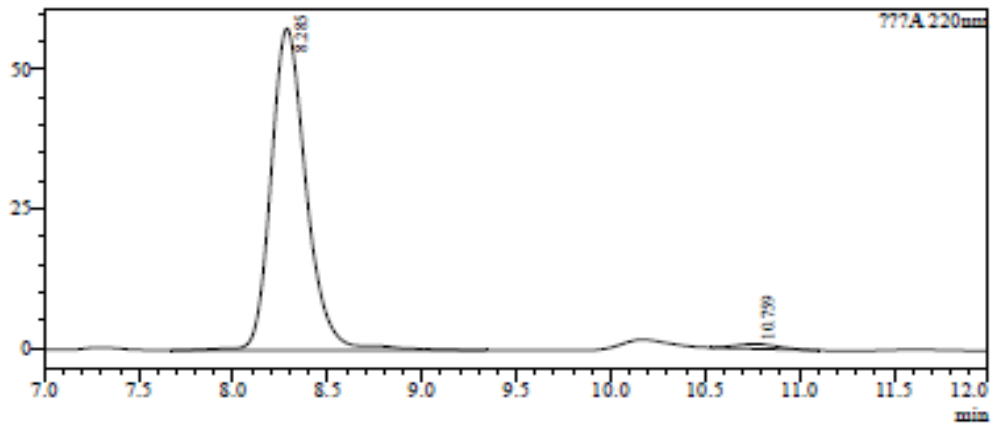

<Peak Table>

777A 220nm

| Peak# | Ret. Time | Area   | Height | Conc.  | Unit | Mark | Name |
|-------|-----------|--------|--------|--------|------|------|------|
| 1     | 8.285     | 752890 | 57693  | 98.302 |      | S    |      |
| 2     | 10.759    | 13005  | 869    | 1.698  |      |      |      |
| Total |           | 765895 | 58562  |        |      |      |      |

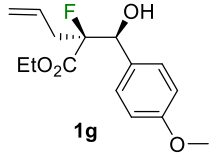

<Chromatogram>

mV

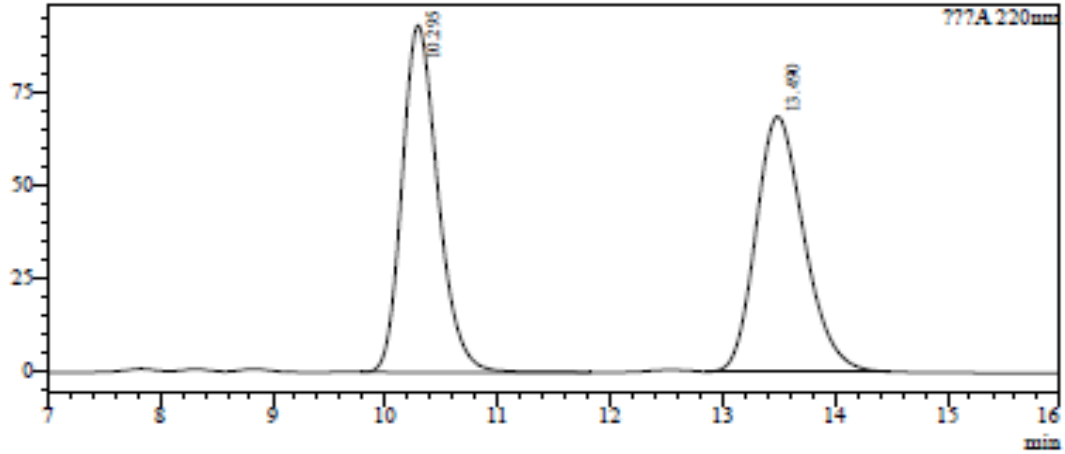

<Peak Table>

777A 220nm

| Peak# | Ret. Time | Area    | Height | Conc.  | Unit | Mark | Name |
|-------|-----------|---------|--------|--------|------|------|------|
| 1     | 10.295    | 2055819 | 92756  | 50.307 |      |      |      |
| 2     | 13.490    | 2030720 | 68239  | 49.693 |      | M    |      |
| Total |           | 4086539 | 160995 |        |      |      |      |

<Chromatogram>

mV

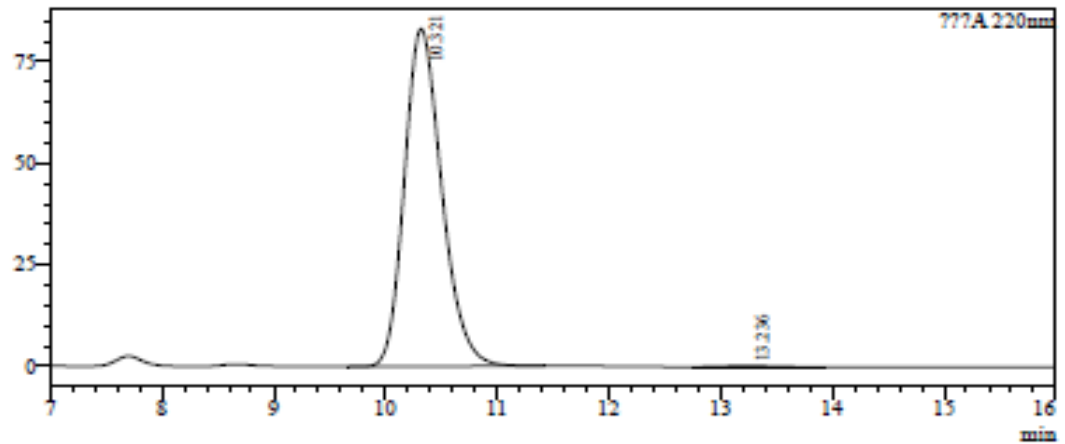

<Peak Table>

777A 220nm

| Peak# | Ret. Time | Area    | Height | Conc.  | Unit | Mark | Name |
|-------|-----------|---------|--------|--------|------|------|------|
| 1     | 10.321    | 1931959 | 82986  | 99.664 |      |      |      |
| 2     | 13.236    | 6520    | 225    | 0.336  |      |      |      |
| Total |           | 1938478 | 83211  |        |      |      |      |

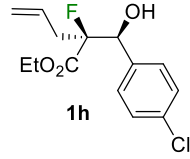

<Chromatogram>

mV

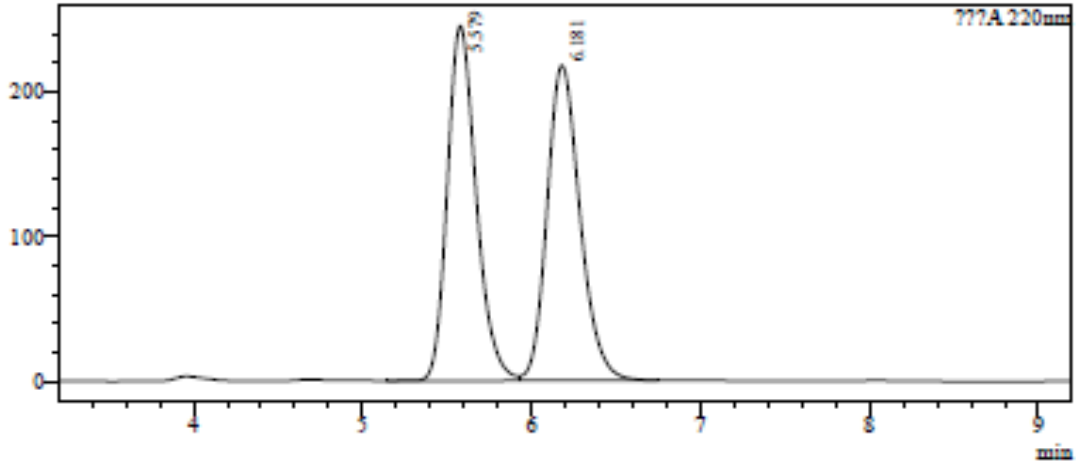

<Peak Table>

777A 220nm

| Peak# | Ret. Time | Area    | Height | Conc.  | Unit | Mark | Name |
|-------|-----------|---------|--------|--------|------|------|------|
| 1     | 5.579     | 2922459 | 244591 | 49.897 |      |      |      |
| 2     | 6.181     | 2934575 | 217390 | 50.103 |      | V    |      |
| Total |           | 5857034 | 461980 |        |      |      |      |

<Chromatogram>

mV

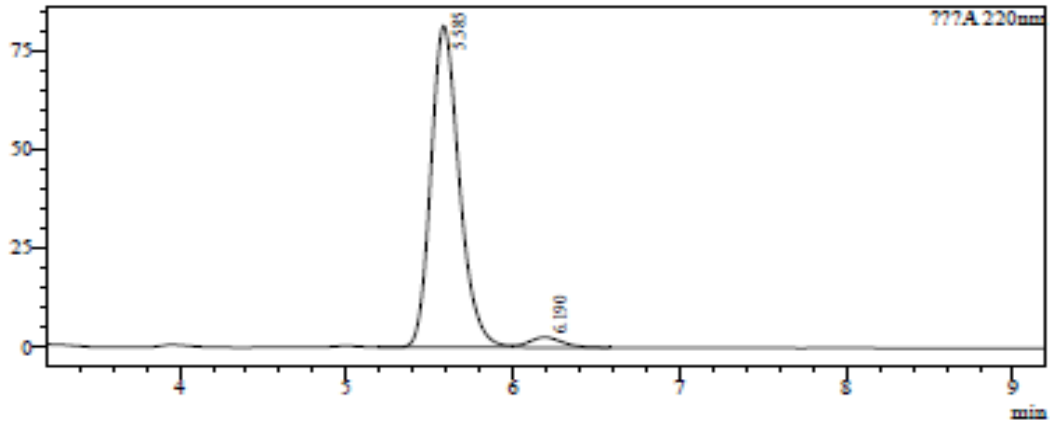

<Peak Table>

777A 220nm

| Peak# | Ret. Time | Area    | Height | Conc.  | Unit | Mark | Name |
|-------|-----------|---------|--------|--------|------|------|------|
| 1     | 5.585     | 967821  | 81386  | 96.448 |      |      |      |
| 2     | 6.190     | 35642   | 2594   | 3.552  |      | V    |      |
| Total |           | 1003464 | 83980  |        |      |      |      |

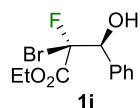

<Chromatogram>

mV

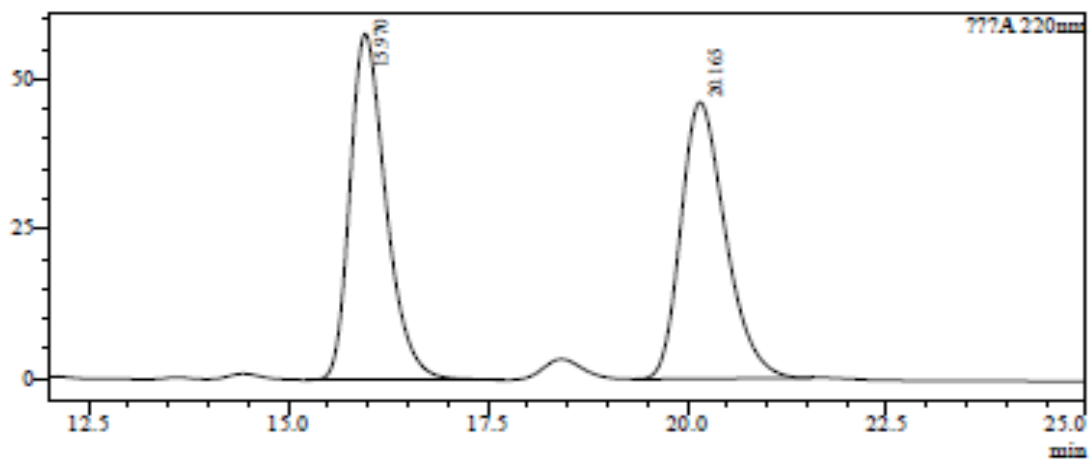

<Peak Table>

| Peak# | Ret. Time | Area    | Height | Conc.  | Unit | Mark | Name |
|-------|-----------|---------|--------|--------|------|------|------|
| 1     | 15.970    | 1815549 | 57860  | 50.200 |      |      |      |
| 2     | 20.165    | 1801076 | 46270  | 49.800 |      |      |      |
| Total |           | 3616625 | 104130 |        |      |      |      |

<Chromatogram>

mV

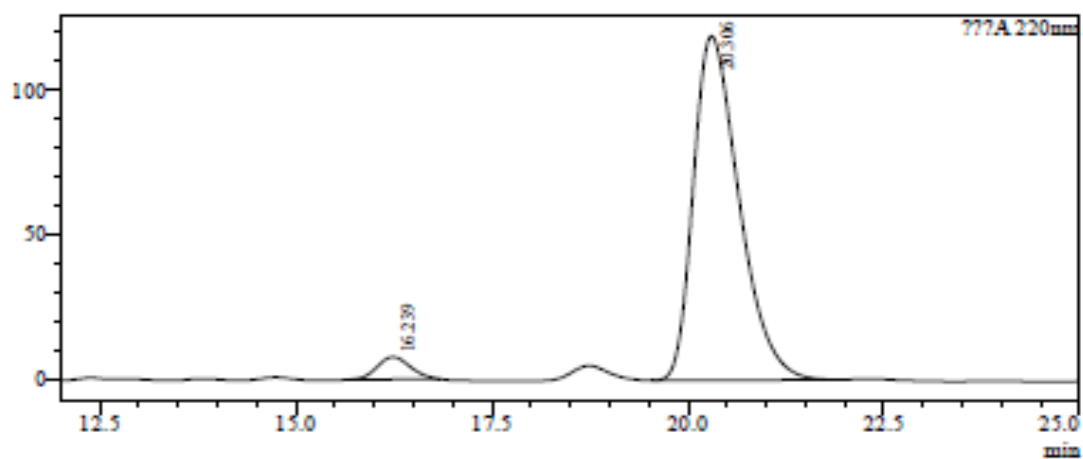

<Peak Table>

| Peak# | Ret. Time | Area    | Height | Conc.  | Unit | Mark | Name |
|-------|-----------|---------|--------|--------|------|------|------|
| 1     | 16.239    | 227182  | 7734   | 4.490  |      | M    |      |
| 2     | 20.306    | 4831990 | 119045 | 95.510 |      |      |      |
| Total |           | 5059172 | 126780 |        |      |      |      |

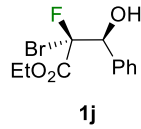

<Chromatogram>

mV

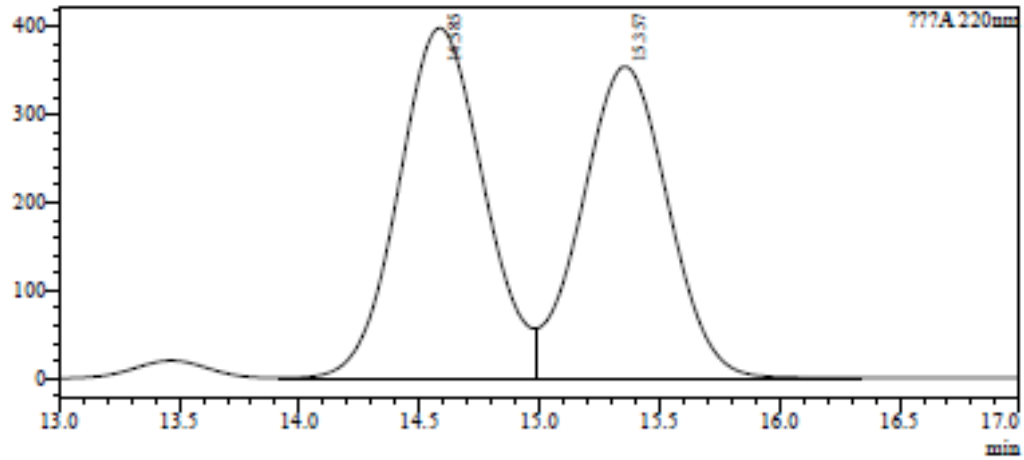

<Peak Table>

777A 220nm

| Peak# | Ret. Time | Area     | Height | Conc.  | Unit | Mark | Name |
|-------|-----------|----------|--------|--------|------|------|------|
| 1     | 14.585    | 9788878  | 398235 | 52.462 |      |      |      |
| 2     | 15.357    | 8869943  | 354517 | 47.538 |      | V    |      |
| Total |           | 18658821 | 752751 |        |      |      |      |

<Chromatogram>

mV

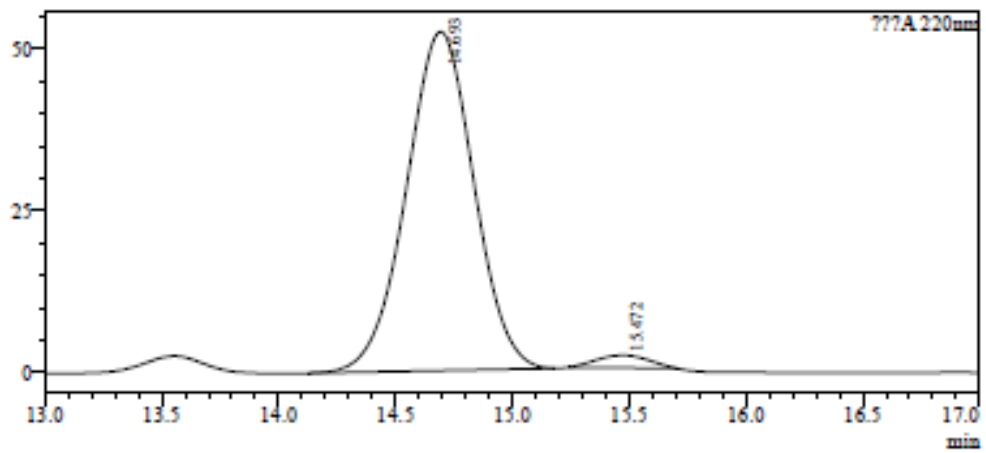

<Peak Table>

777A 220nm

| Peak# | Ret. Time | Area    | Height | Conc.  | Unit | Mark | Name |
|-------|-----------|---------|--------|--------|------|------|------|
| 1     | 14.693    | 1053359 | 52403  | 97.242 |      |      |      |
| 2     | 15.472    | 29875   | 1926   | 2.758  |      | M    |      |
| Total |           | 1083234 | 54328  |        |      |      |      |

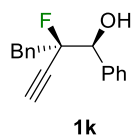

<Chromatogram>

mV

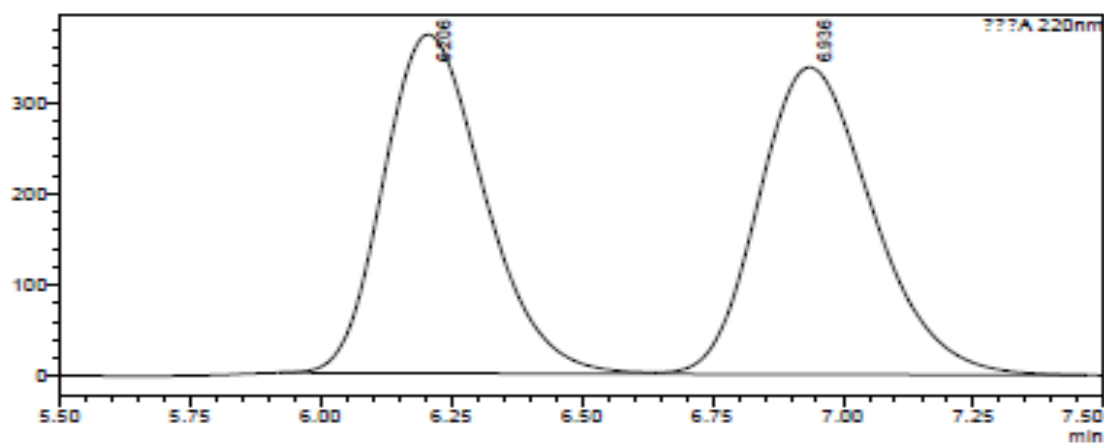

<Peak Table>

??A 220nm

| Peak# | Ret. Time | Area     | Height | Conc.  | Unit | Mark | Name |
|-------|-----------|----------|--------|--------|------|------|------|
| 1     | 6.206     | 4970491  | 370466 | 49.378 |      |      |      |
| 2     | 6.936     | 5095773  | 335819 | 50.622 |      | V    |      |
| Total |           | 10066264 | 706285 |        |      |      |      |

<Chromatogram>

mV

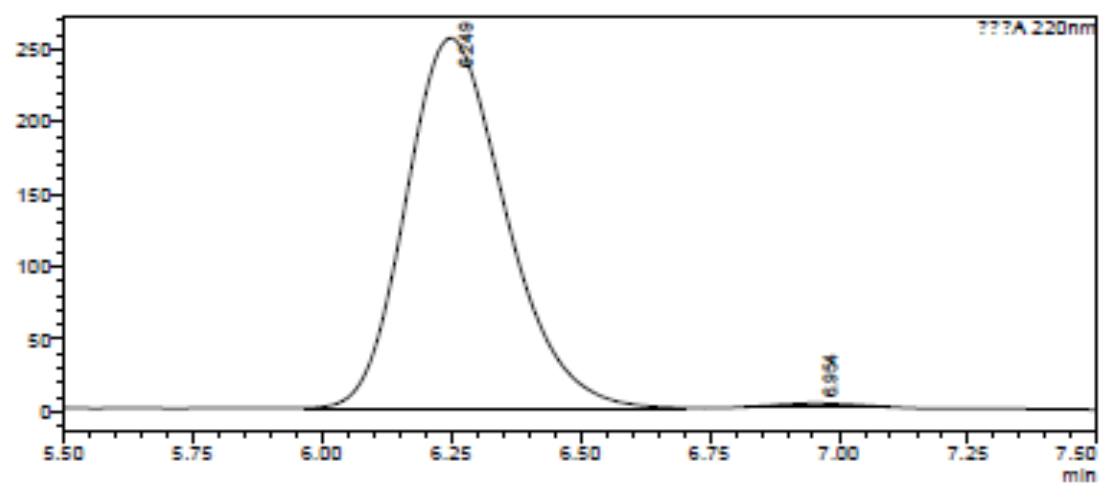

<Peak Table>

??A 220nm

| Peak# | Ret. Time | Area    | Height | Conc.  | Unit | Mark | Name |
|-------|-----------|---------|--------|--------|------|------|------|
| 1     | 6.249     | 3419222 | 255549 | 99.263 |      |      |      |
| 2     | 6.954     | 25393   | 2556   | 0.737  |      | M    |      |
| Total |           | 3444614 | 258105 |        |      |      |      |

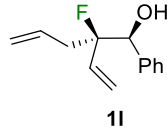

<Chromatogram>

mV

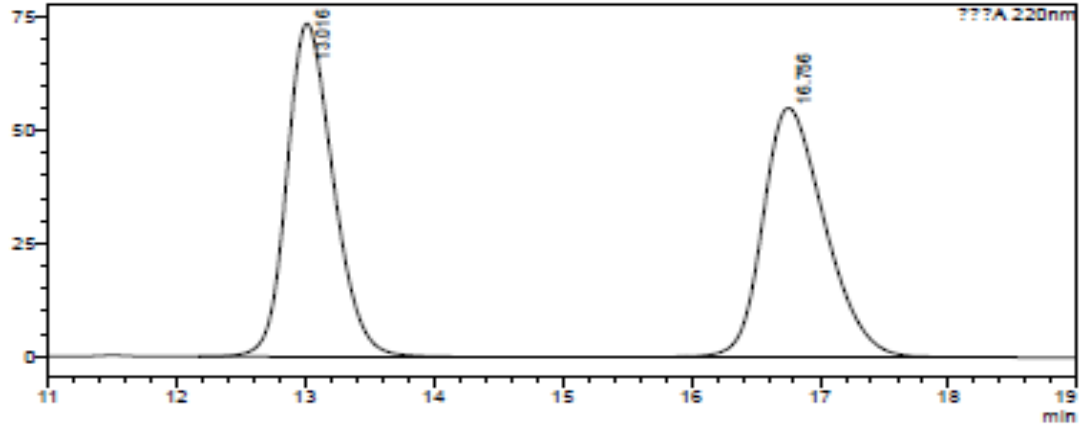

<Peak Table>

??A 220nm

| Peak# | Ret. Time | Area    | Height | Conc.  | Unit | Mark | Name |
|-------|-----------|---------|--------|--------|------|------|------|
| 1     | 13.016    | 1848570 | 73765  | 50.103 |      |      |      |
| 2     | 16.756    | 1840954 | 55139  | 49.897 |      |      |      |
| Total |           | 3689524 | 128903 |        |      |      |      |

<Chromatogram>

mV

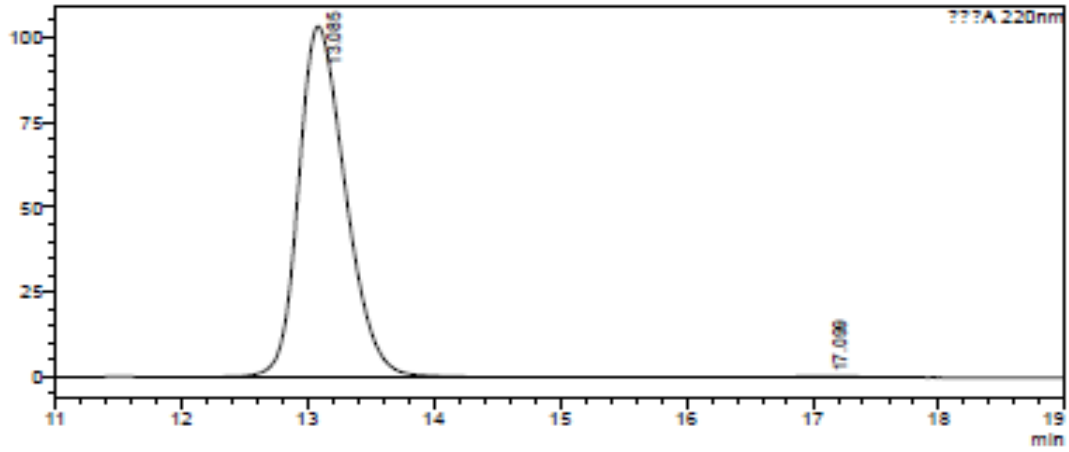

<Peak Table>

??A 220nm

| Peak# | Ret. Time | Area    | Height | Conc.  | Unit | Mark | Name |
|-------|-----------|---------|--------|--------|------|------|------|
| 1     | 13.085    | 2660439 | 103251 | 99.691 |      |      |      |
| 2     | 17.099    | 8233    | 267    | 0.309  |      |      |      |
| Total |           | 2668672 | 103519 |        |      |      |      |

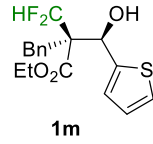

<Chromatogram>

mV

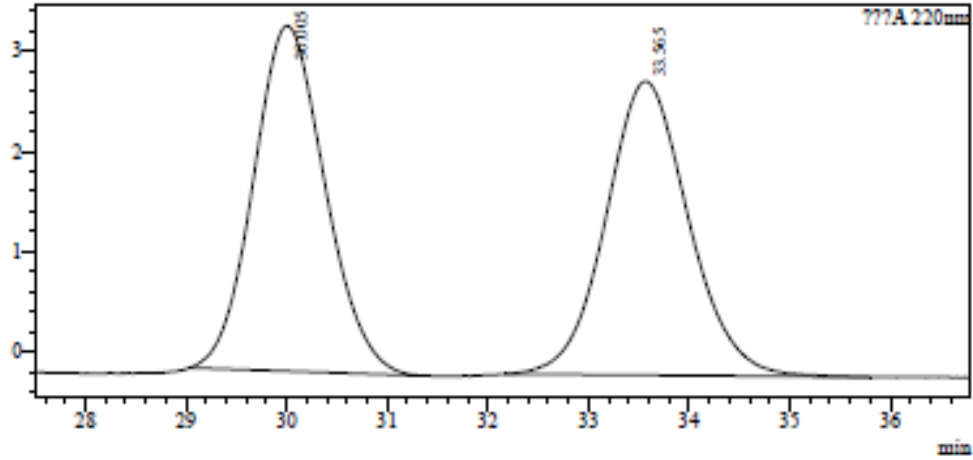

<Peak Table>

777A 220nm

| Peak# | Ret. Time | Area   | Height | Conc.  | Unit | Mark | Name |
|-------|-----------|--------|--------|--------|------|------|------|
| 1     | 30.005    | 170160 | 3441   | 50.424 |      |      |      |
| 2     | 33.565    | 167295 | 2926   | 49.576 |      | M    |      |
| Total |           | 337455 | 6367   |        |      |      |      |

<Chromatogram>

mV

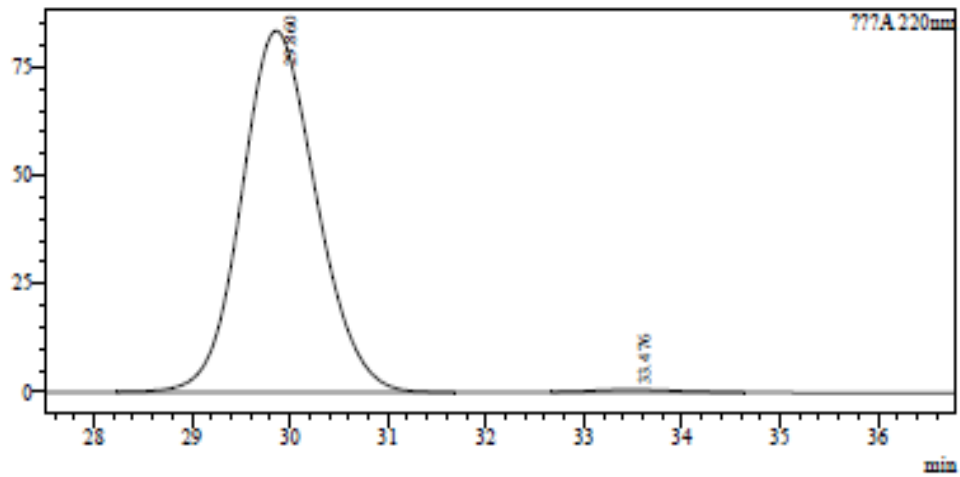

<Peak Table>

777A 220nm

| Peak# | Ret. Time | Area    | Height | Conc.  | Unit | Mark | Name |
|-------|-----------|---------|--------|--------|------|------|------|
| 1     | 29.860    | 4435195 | 83567  | 99.241 |      |      |      |
| 2     | 33.476    | 33912   | 648    | 0.759  |      |      |      |
| Total |           | 4469106 | 84215  |        |      |      |      |



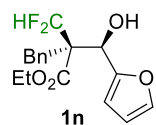

<Chromatogram>

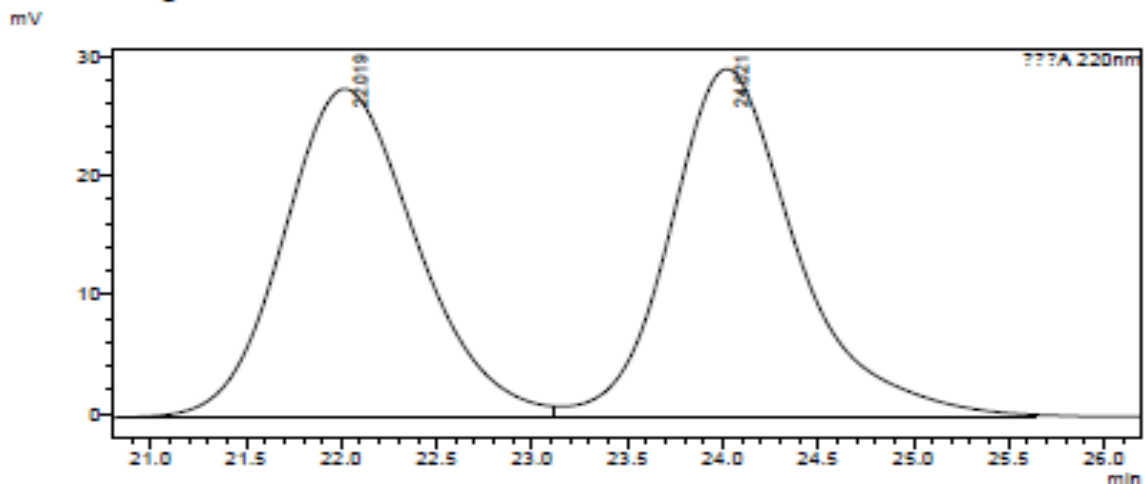

<Peak Table>

??A 220nm

| Peak# | Ret. Time | Area    | Height | Conc.  | Unit | Mark | Name |
|-------|-----------|---------|--------|--------|------|------|------|
| 1     | 22.019    | 1337474 | 27514  | 49.656 |      | M    |      |
| 2     | 24.021    | 1356032 | 29171  | 50.344 |      | V M  |      |
| Total |           | 2693506 | 56685  |        |      |      |      |

<Chromatogram>

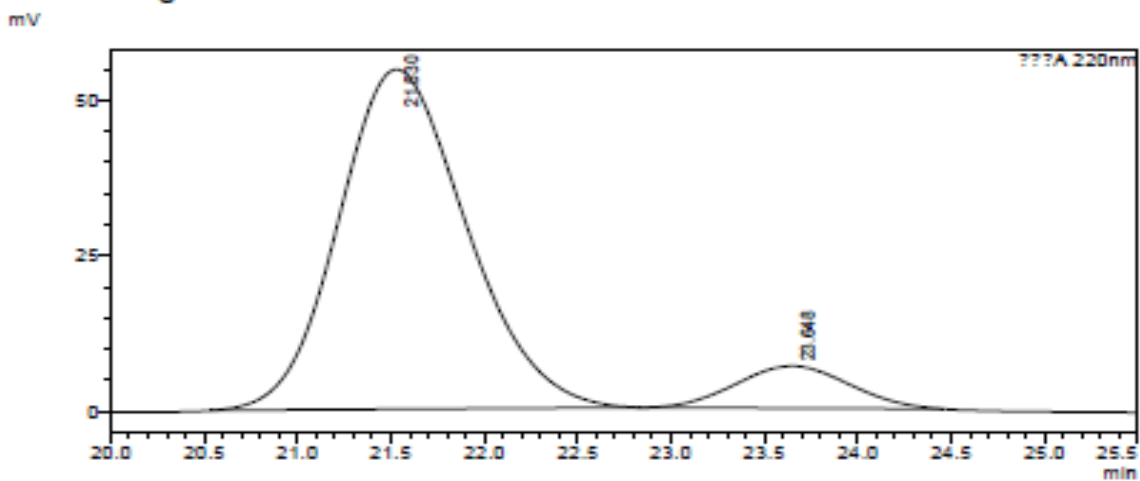

<Peak Table>

??A 220nm

| Peak# | Ret. Time | Area    | Height | Conc.  | Unit | Mark | Name |
|-------|-----------|---------|--------|--------|------|------|------|
| 1     | 21.530    | 2593876 | 54578  | 90.098 |      | M    |      |
| 2     | 23.648    | 285076  | 6756   | 9.902  |      | M    |      |
| Total |           | 2878953 | 61334  |        |      |      |      |

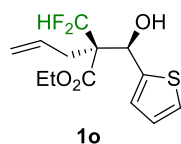

<Chromatogram>

mV

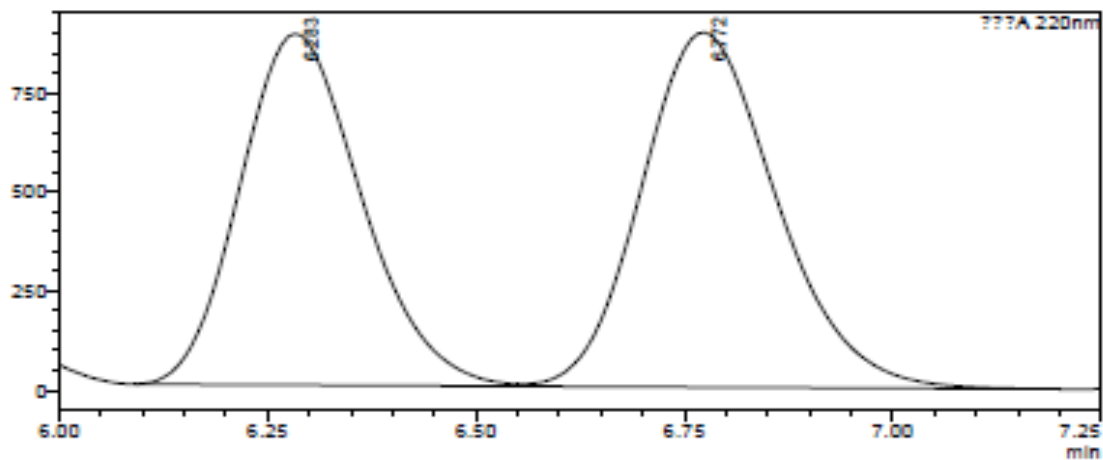

<Peak Table>

??A 220nm

| Peak# | Ret. Time | Area     | Height  | Conc.  | Unit | Mark | Name |
|-------|-----------|----------|---------|--------|------|------|------|
| 1     | 6.283     | 8955367  | 885514  | 47.083 |      |      |      |
| 2     | 6.772     | 10065051 | 893748  | 52.917 |      | V    |      |
| Total |           | 19020418 | 1779262 |        |      |      |      |

<Chromatogram>

mV

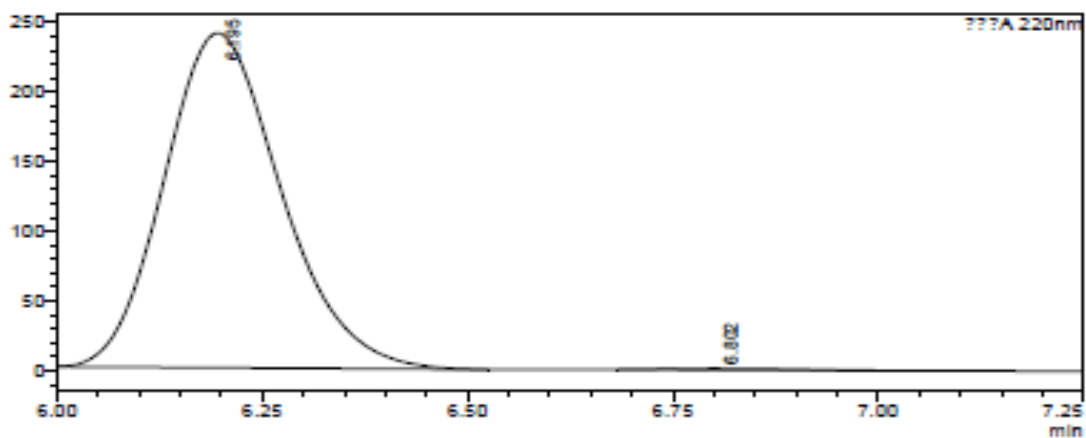

<Peak Table>

??A 220nm

| Peak# | Ret. Time | Area    | Height | Conc.  | Unit | Mark | Name |
|-------|-----------|---------|--------|--------|------|------|------|
| 1     | 6.195     | 2381115 | 239960 | 99.588 |      |      |      |
| 2     | 6.802     | 9856    | 1022   | 0.412  |      |      |      |
| Total |           | 2390971 | 240982 |        |      |      |      |

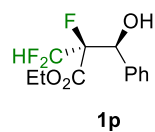

<Chromatogram>

mV

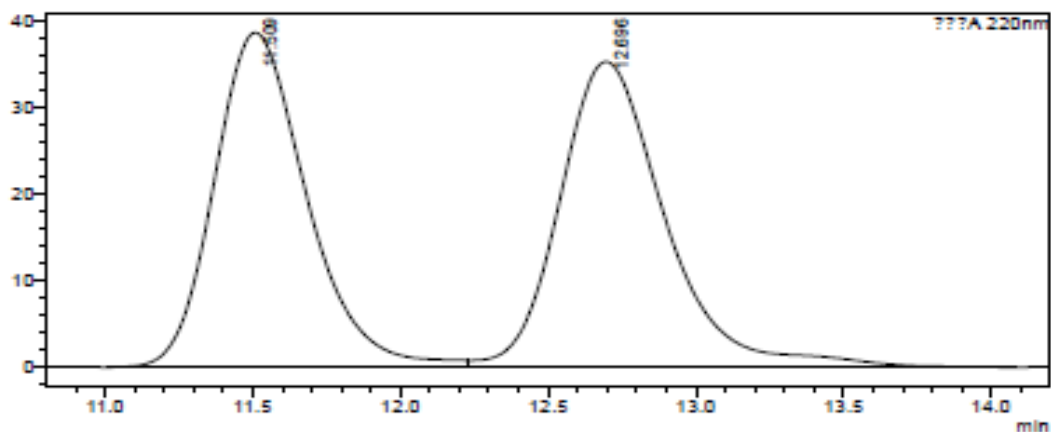

<Peak Table>

??A 220nm

| Peak# | Ret. Time | Area    | Height | Conc.  | Unit | Mark | Name |
|-------|-----------|---------|--------|--------|------|------|------|
| 1     | 11.509    | 836960  | 38578  | 49.015 |      |      |      |
| 2     | 12.696    | 870596  | 35224  | 50.985 |      | V    |      |
| Total |           | 1707556 | 73801  |        |      |      |      |

<Chromatogram>

mV

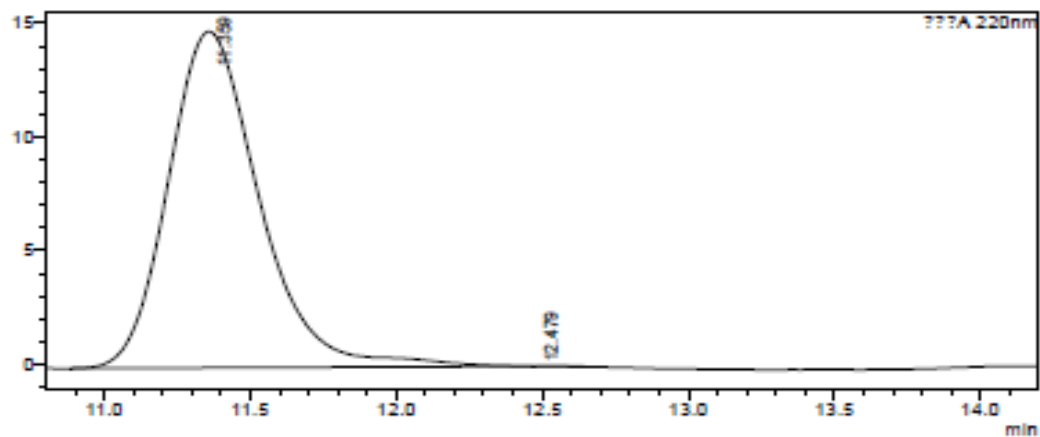

<Peak Table>

??A 220nm

| Peak# | Ret. Time | Area   | Height | Conc.  | Unit | Mark | Name |
|-------|-----------|--------|--------|--------|------|------|------|
| 1     | 11.359    | 320901 | 14792  | 99.969 |      |      |      |
| 2     | 12.479    | 98     | 1      | 0.031  |      | M    |      |
| Total |           | 321000 | 14793  |        |      |      |      |

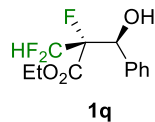

<Chromatogram>

mV

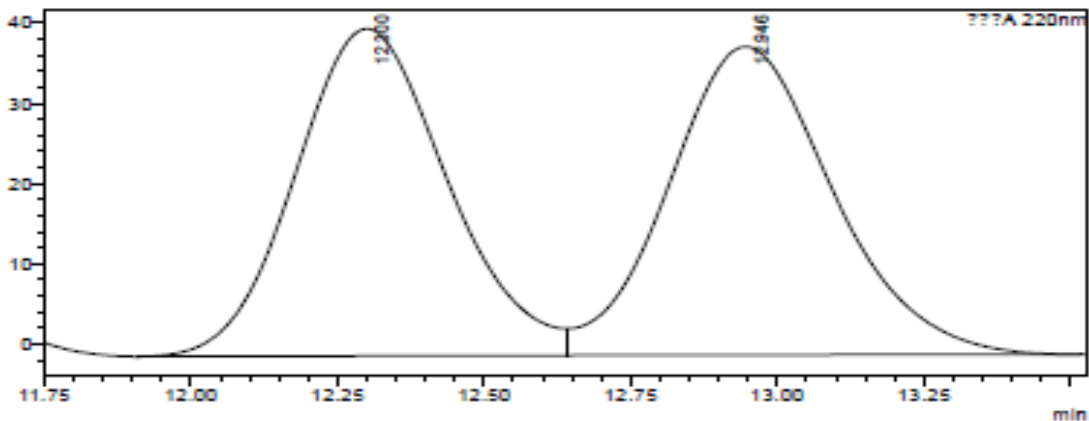

<Peak Table>

??A 220nm

| Peak# | Ret. Time | Area    | Height | Conc.  | Unit | Mark | Name |
|-------|-----------|---------|--------|--------|------|------|------|
| 1     | 12.300    | 732411  | 40777  | 49.532 |      |      |      |
| 2     | 12.946    | 746260  | 38397  | 50.468 |      | V    |      |
| Total |           | 1478671 | 79174  |        |      |      |      |

<Chromatogram>

mV

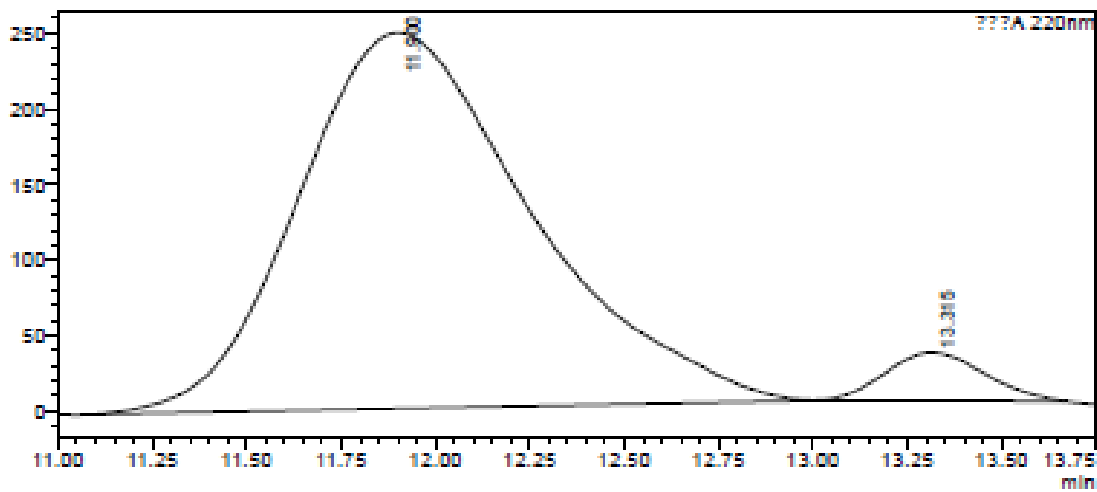

<Peak Table>

??A 220nm

| Peak# | Ret. Time | Area     | Height | Conc.  | Unit | Mark | Name |
|-------|-----------|----------|--------|--------|------|------|------|
| 1     | 11.900    | 10657558 | 248408 | 94.851 |      |      |      |
| 2     | 13.315    | 578494   | 31784  | 5.149  |      | M    |      |
| Total |           | 11236052 | 280192 |        |      |      |      |

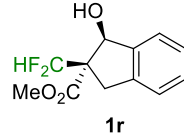

<Chromatogram>

mV

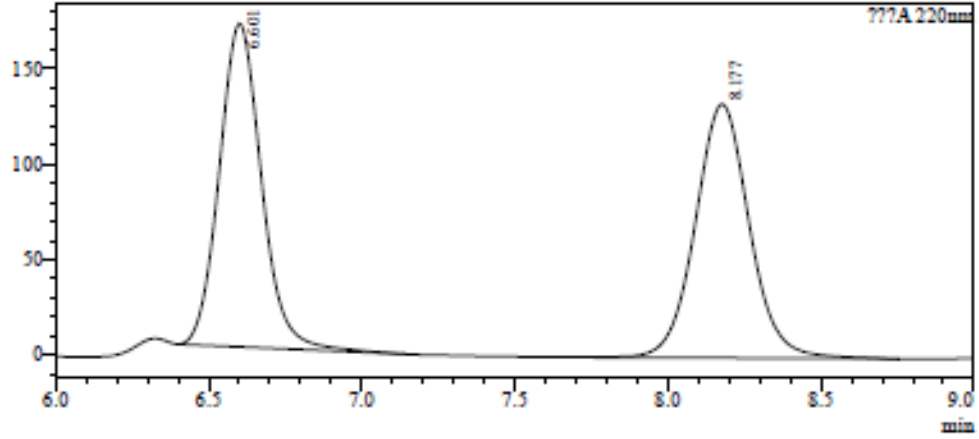

<Peak Table>

| Peak# | Ret. Time | Area    | Height | Conc.  | Unit | Mark | Name |
|-------|-----------|---------|--------|--------|------|------|------|
| 1     | 6.601     | 1623134 | 169397 | 49.854 |      |      |      |
| 2     | 8.177     | 1632664 | 132933 | 50.146 |      |      |      |
| Total |           | 3255798 | 302330 |        |      |      |      |

<Chromatogram>

mV

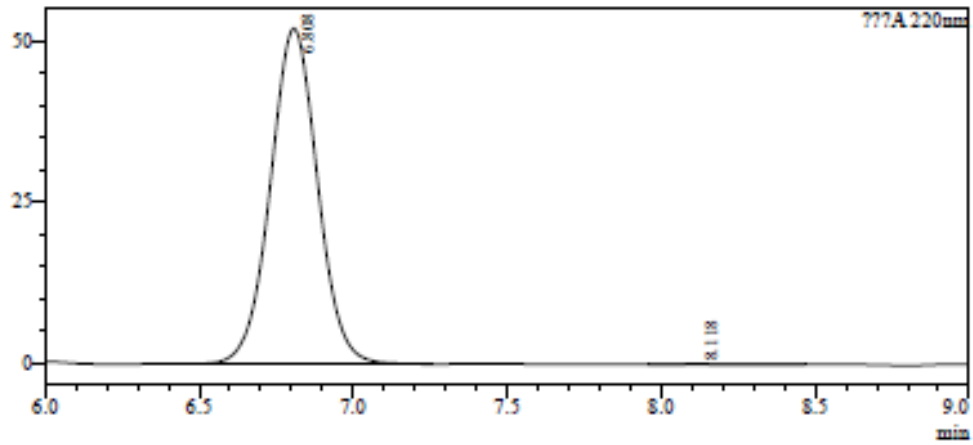

<Peak Table>

| Peak# | Ret. Time | Area   | Height | Conc.  | Unit | Mark | Name |
|-------|-----------|--------|--------|--------|------|------|------|
| 1     | 6.808     | 558770 | 52304  | 99.809 |      | V    |      |
| 2     | 8.118     | 1069   | 90     | 0.191  |      |      |      |
| Total |           | 559839 | 52394  |        |      |      |      |

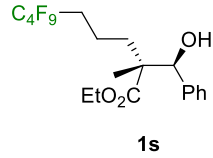

<Chromatogram>

mV

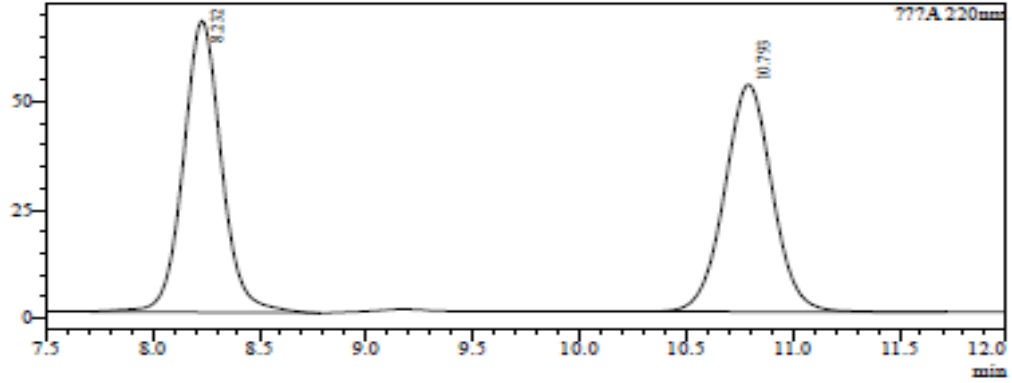

<Peak Table>

| Peak# | Ret. Time | Area    | Height | Conc.  | Unit | Mark | Name |
|-------|-----------|---------|--------|--------|------|------|------|
| 1     | 8.232     | 837867  | 67161  | 30.678 |      |      |      |
| 2     | 10.793    | 815455  | 52403  | 49.322 |      |      |      |
| Total |           | 1653322 | 119564 |        |      |      |      |

<Chromatogram>

mV

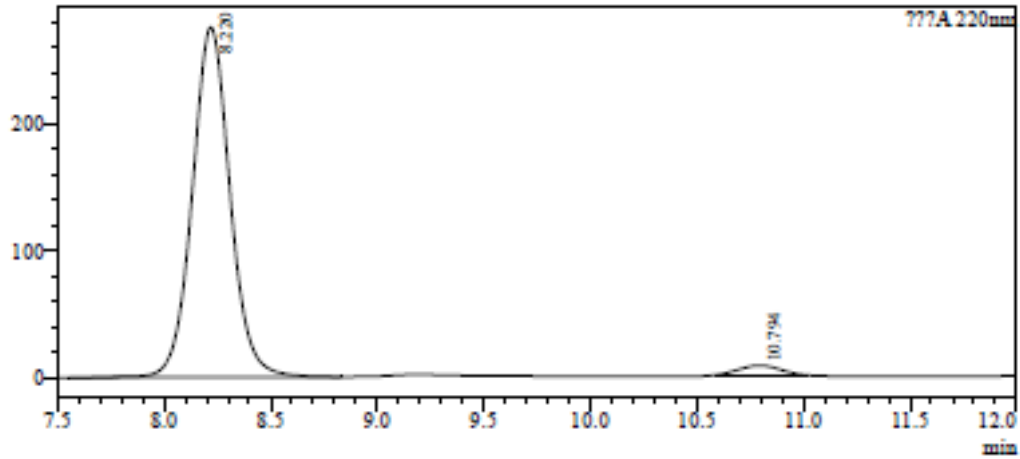

<Peak Table>

| Peak# | Ret. Time | Area    | Height | Conc.  | Unit | Mark | Name |
|-------|-----------|---------|--------|--------|------|------|------|
| 1     | 8.220     | 3403032 | 275483 | 97.121 |      |      |      |
| 2     | 10.794    | 100895  | 7629   | 2.879  |      | M    |      |
| Total |           | 3503927 | 283112 |        |      |      |      |

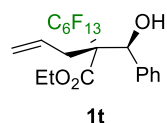

<Chromatogram>

mV

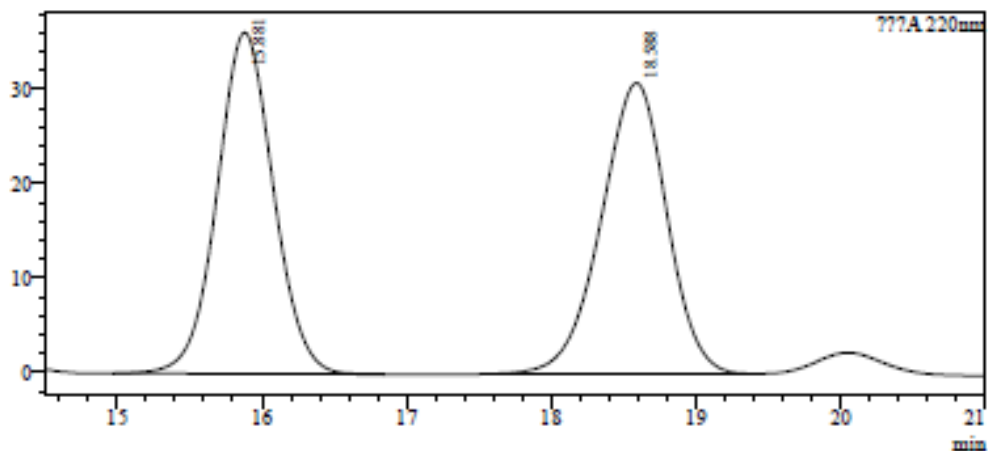

<Peak Table>

???A 220nm

| Peak# | Ret. Time | Area    | Height | Conc.  | Unit | Mark | Name |
|-------|-----------|---------|--------|--------|------|------|------|
| 1     | 15.881    | 979692  | 36175  | 50.104 |      |      |      |
| 2     | 18.388    | 975629  | 30846  | 49.896 |      |      |      |
| Total |           | 1955321 | 67020  |        |      |      |      |

<Chromatogram>

mV

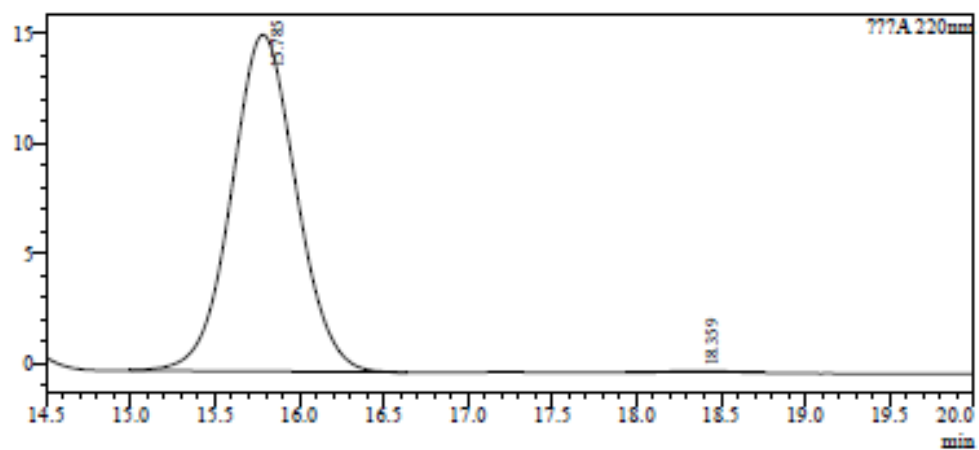

<Peak Table>

???A 220nm

| Peak# | Ret. Time | Area   | Height | Conc.  | Unit | Mark | Name |
|-------|-----------|--------|--------|--------|------|------|------|
| 1     | 15.785    | 408550 | 15310  | 99.480 |      |      |      |
| 2     | 18.359    | 2137   | 86     | 0.520  |      | M    |      |
| Total |           | 410688 | 15396  |        |      |      |      |

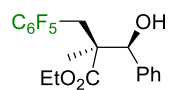

1u

<Chromatogram>

mV

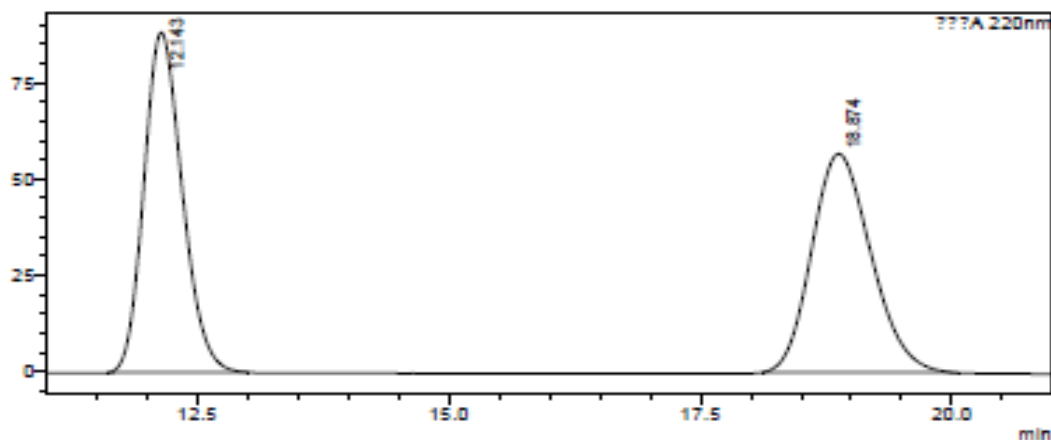

<Peak Table>

??A 220nm

| Peak# | Ret. Time | Area    | Height | Conc.  | Unit | Mark | Name |
|-------|-----------|---------|--------|--------|------|------|------|
| 1     | 12.143    | 2343743 | 88326  | 50.165 |      |      |      |
| 2     | 18.874    | 2328356 | 56807  | 49.835 |      |      |      |
| Total |           | 4672099 | 145134 |        |      |      |      |

<Chromatogram>

mV

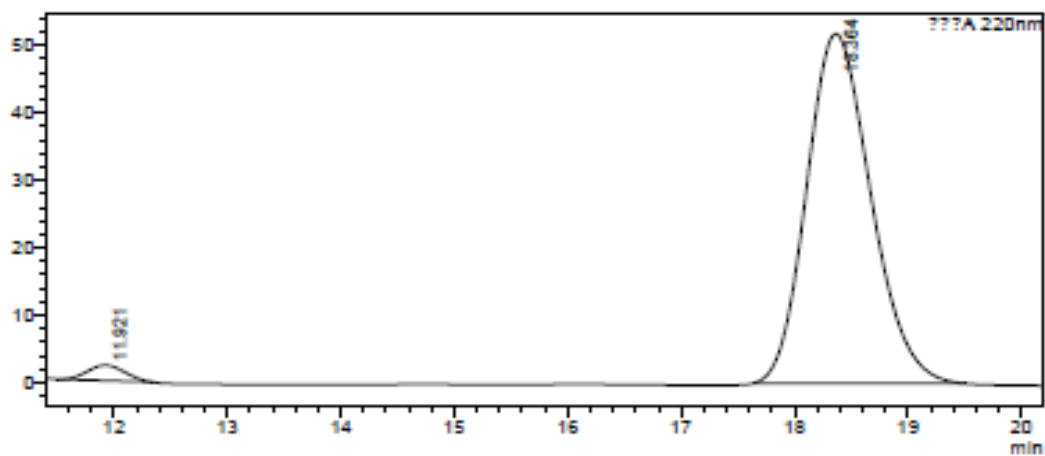

<Peak Table>

??A 220nm

| Peak# | Ret. Time | Area    | Height | Conc.  | Unit | Mark | Name |
|-------|-----------|---------|--------|--------|------|------|------|
| 1     | 11.921    | 52192   | 2280   | 2.501  |      | M    |      |
| 2     | 18.364    | 2034630 | 51794  | 97.499 |      |      |      |
| Total |           | 2086822 | 54074  |        |      |      |      |



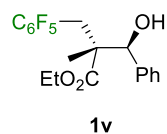

<Chromatogram>

mV

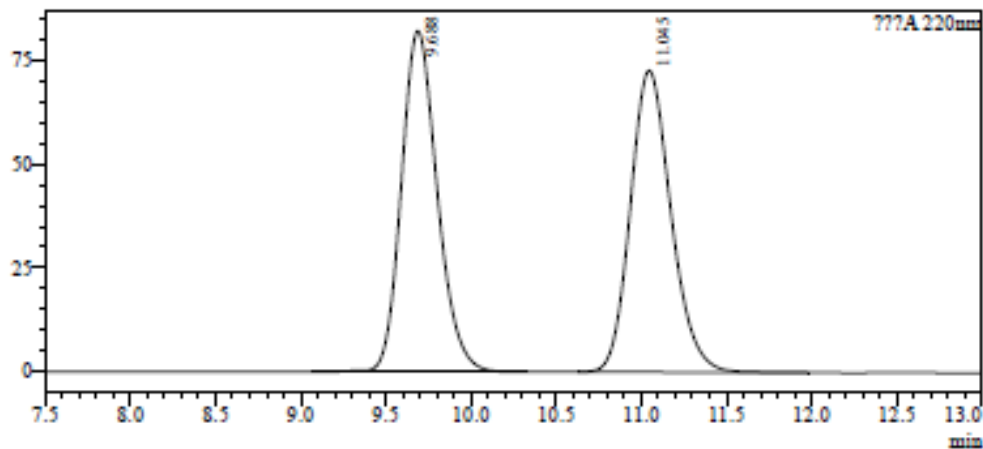

<Peak Table>

777A 220nm

| Peak# | Ret. Time | Area    | Height | Conc.  | Unit | Mark | Name |
|-------|-----------|---------|--------|--------|------|------|------|
| 1     | 9.688     | 1207385 | 81927  | 50.108 |      |      |      |
| 2     | 11.045    | 1202175 | 72410  | 49.892 |      |      |      |
| Total |           | 2409560 | 154337 |        |      |      |      |

<Chromatogram>

mV

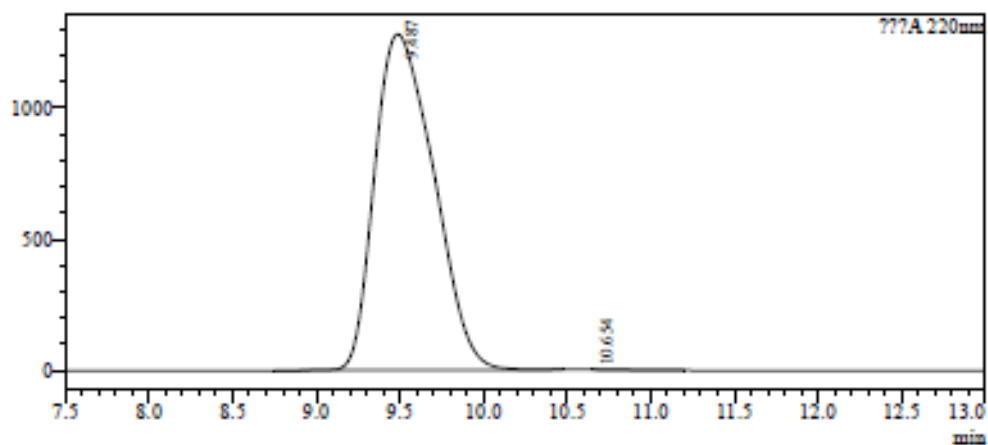

<Peak Table>

777A 220nm

| Peak# | Ret. Time | Area     | Height  | Conc.  | Unit | Mark | Name |
|-------|-----------|----------|---------|--------|------|------|------|
| 1     | 9.487     | 31414499 | 1278637 | 99.976 |      |      |      |
| 2     | 10.654    | 7444     | 19      | 0.024  |      | M    |      |
| Total |           | 31421943 | 1278656 |        |      |      |      |

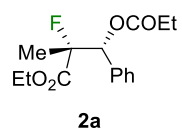

<Chromatogram>

mV

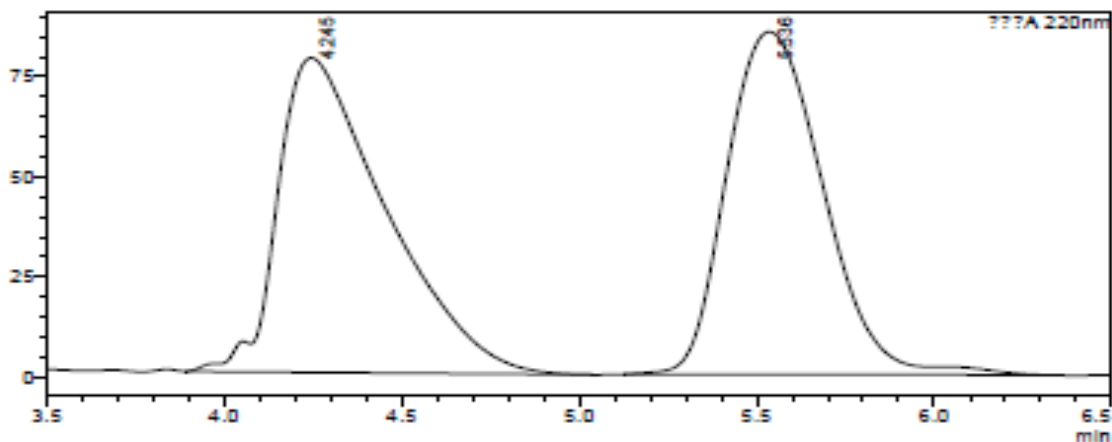

<Peak Table>

???A 220nm

| Peak# | Ret. Time | Area    | Height | Conc.  | Unit | Mark | Name |
|-------|-----------|---------|--------|--------|------|------|------|
| 1     | 4.245     | 1661297 | 78442  | 50.732 |      |      |      |
| 2     | 5.536     | 1613338 | 85469  | 49.268 |      | M    |      |
| Total |           | 3274635 | 163911 |        |      |      |      |

<Chromatogram>

mV

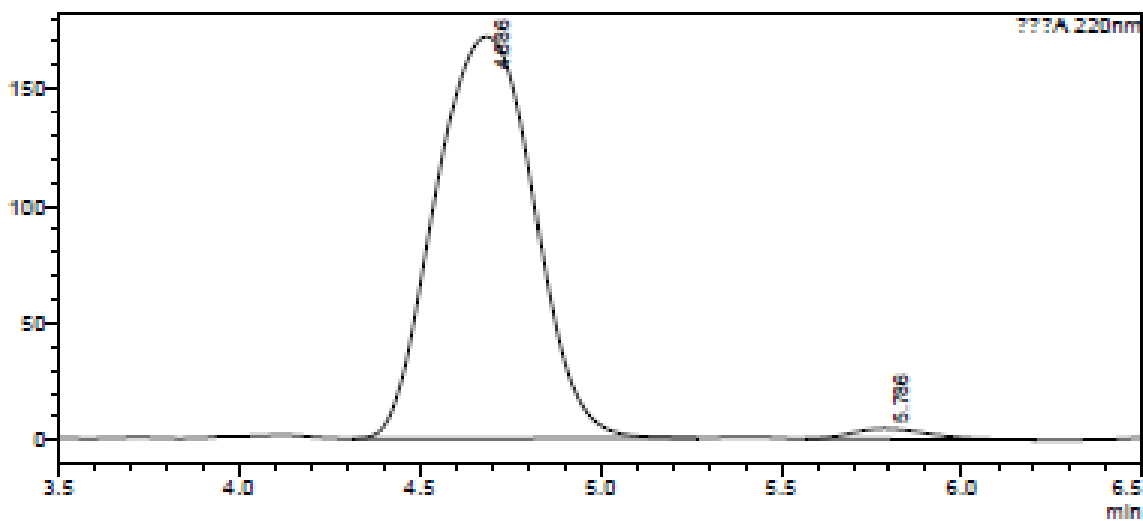

<Peak Table>

???A 220nm

| Peak# | Ret. Time | Area    | Height | Conc.  | Unit | Mark | Name |
|-------|-----------|---------|--------|--------|------|------|------|
| 1     | 4.686     | 3255949 | 171392 | 98.101 |      |      |      |
| 2     | 5.786     | 63018   | 4425   | 1.899  |      |      |      |
| Total |           | 3318968 | 175817 |        |      |      |      |

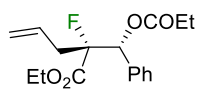

2b

<Chromatogram>

mV

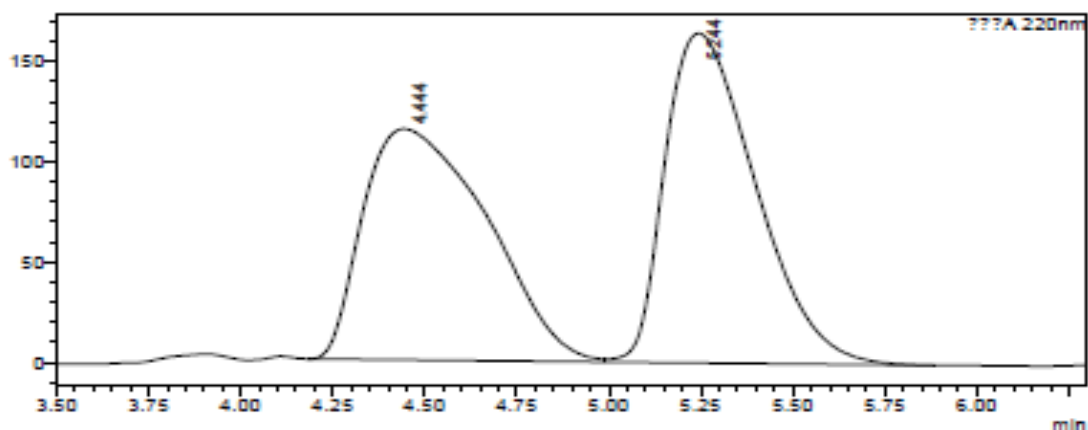

<Peak Table>

??A 220nm

| Peak# | Ret. Time | Area    | Height | Conc.  | Unit | Mark | Name |
|-------|-----------|---------|--------|--------|------|------|------|
| 1     | 4.444     | 2703549 | 115281 | 48.969 |      |      |      |
| 2     | 5.244     | 2817351 | 164521 | 51.031 |      | V    |      |
| Total |           | 5520900 | 279801 |        |      |      |      |

<Chromatogram>

mV

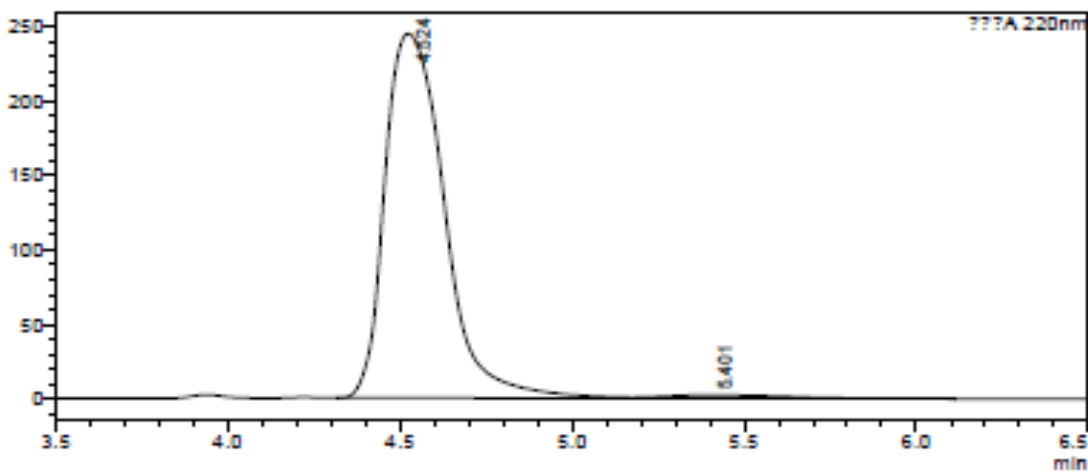

<Peak Table>

??A 220nm

| Peak# | Ret. Time | Area    | Height | Conc.  | Unit | Mark | Name |
|-------|-----------|---------|--------|--------|------|------|------|
| 1     | 4.524     | 2944557 | 244889 | 98.187 |      |      |      |
| 2     | 5.401     | 54364   | 2230   | 1.813  |      | V    |      |
| Total |           | 2998922 | 247119 |        |      |      |      |

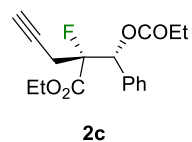

<Chromatogram>

mV

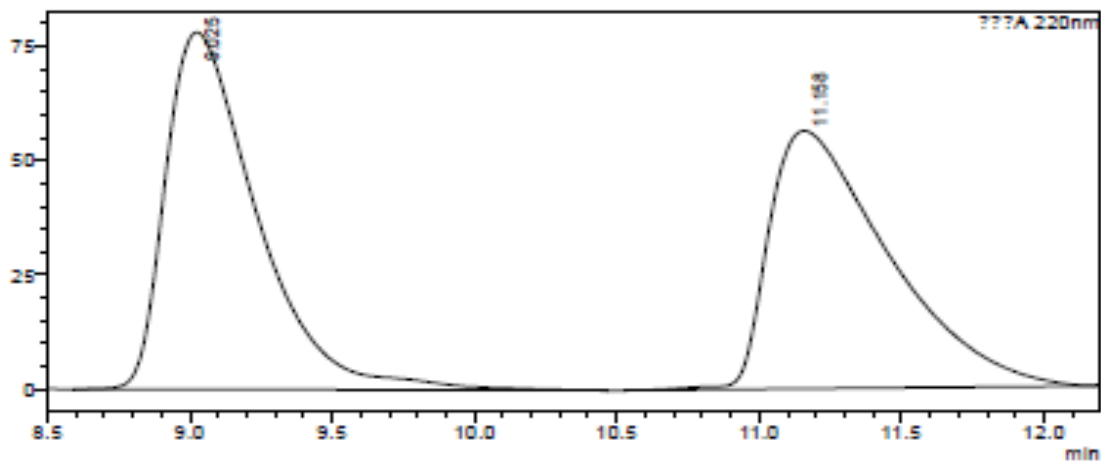

<Peak Table>

??A 220nm

| Peak# | Ret. Time | Area    | Height | Conc.  | Unit | Mark | Name |
|-------|-----------|---------|--------|--------|------|------|------|
| 1     | 9.025     | 1740874 | 78080  | 51.396 |      |      |      |
| 2     | 11.158    | 1646333 | 56342  | 48.604 |      |      |      |
| Total |           | 3387207 | 134422 |        |      |      |      |

<Chromatogram>

mV

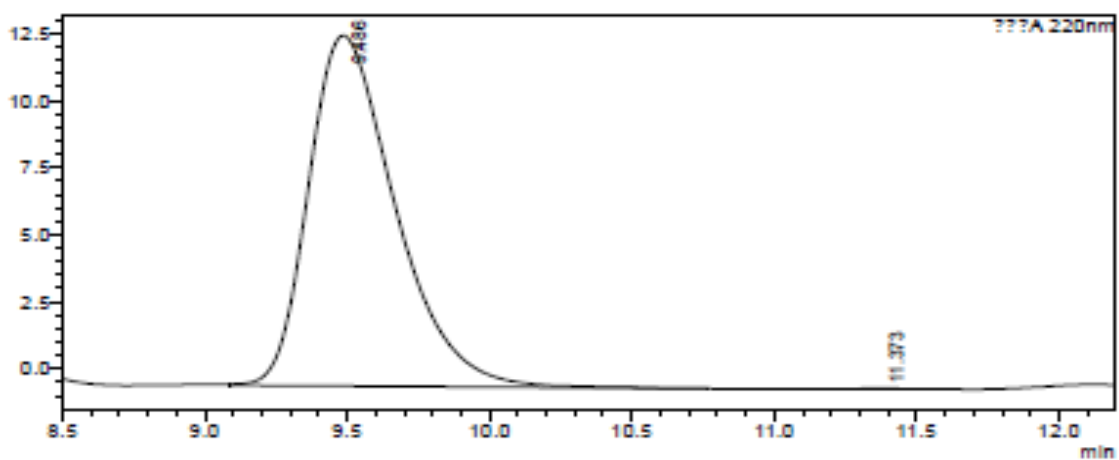

<Peak Table>

??A 220nm

| Peak# | Ret. Time | Area   | Height | Conc.  | Unit | Mark | Name |
|-------|-----------|--------|--------|--------|------|------|------|
| 1     | 9.486     | 277361 | 13065  | 99.961 |      | V    |      |
| 2     | 11.373    | 108    | 10     | 0.039  |      | M    |      |
| Total |           | 277470 | 13075  |        |      |      |      |

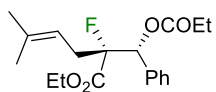

2d

<Chromatogram>

mV

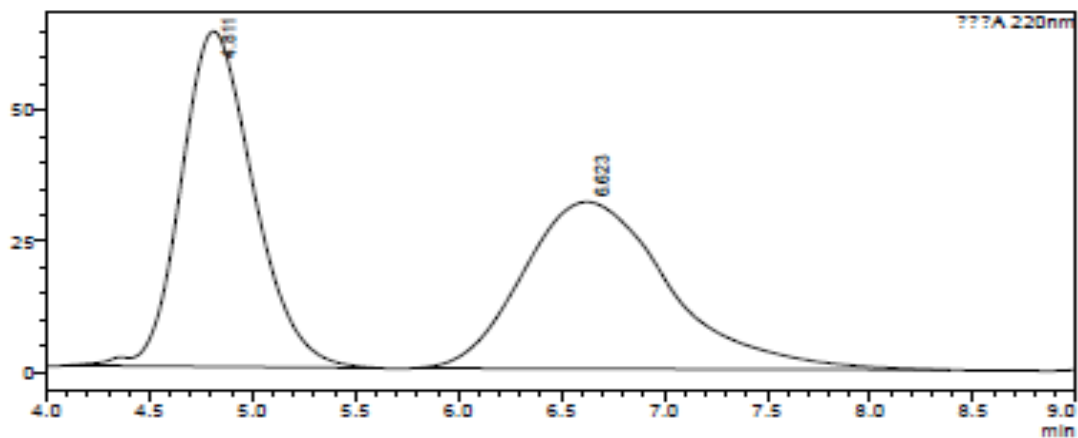

<Peak Table>

??A 220nm

| Peak# | Ret. Time | Area    | Height | Conc.  | Unit | Mark | Name |
|-------|-----------|---------|--------|--------|------|------|------|
| 1     | 4.811     | 1574151 | 64154  | 49.873 |      | M    |      |
| 2     | 6.623     | 1582196 | 31911  | 50.127 |      | M    |      |
| Total |           | 3156347 | 96065  |        |      |      |      |

<Chromatogram>

mV

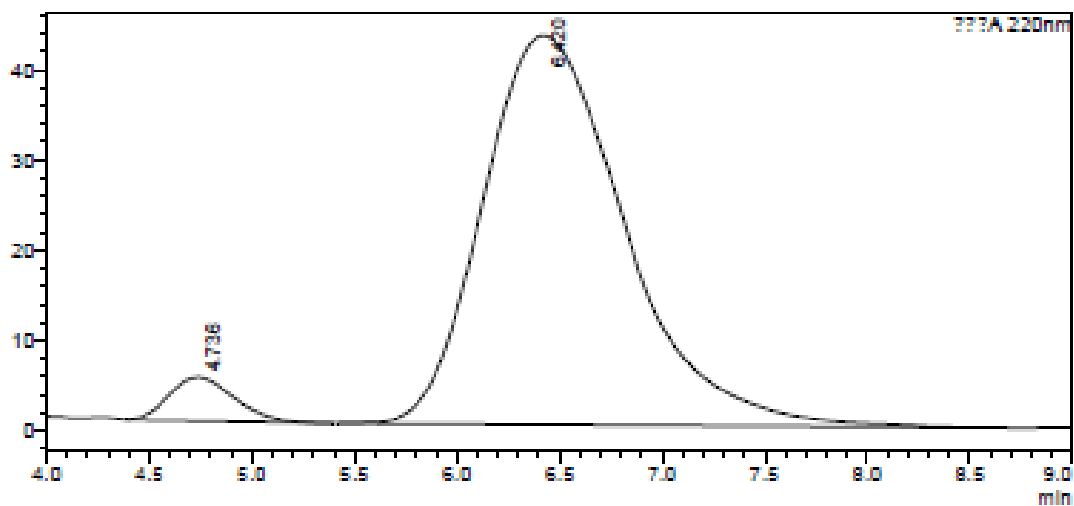

<Peak Table>

??A 220nm

| Peak# | Ret. Time | Area    | Height | Conc.  | Unit | Mark | Name |
|-------|-----------|---------|--------|--------|------|------|------|
| 1     | 4.736     | 106131  | 4843   | 4.869  |      |      |      |
| 2     | 6.420     | 2073387 | 43138  | 95.131 |      |      |      |
| Total |           | 2179518 | 47981  |        |      |      |      |

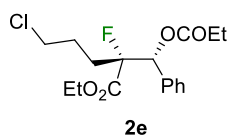

<Chromatogram>

mV

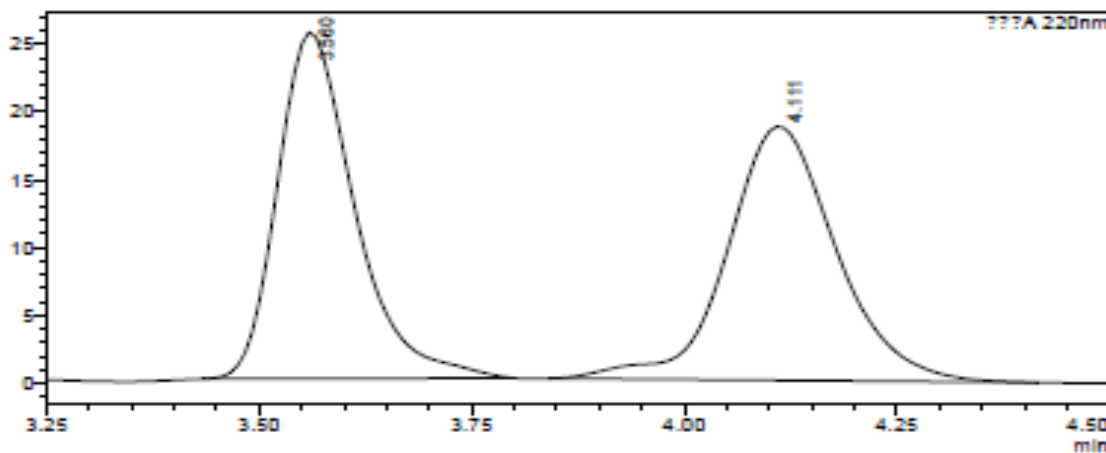

<Peak Table>

??A 220nm

| Peak# | Ret. Time | Area   | Height | Conc.  | Unit | Mark | Name |
|-------|-----------|--------|--------|--------|------|------|------|
| 1     | 3.560     | 161013 | 25542  | 49.104 |      |      |      |
| 2     | 4.111     | 166886 | 18719  | 50.896 |      | M    |      |
| Total |           | 327899 | 44261  |        |      |      |      |

<Chromatogram>

mV

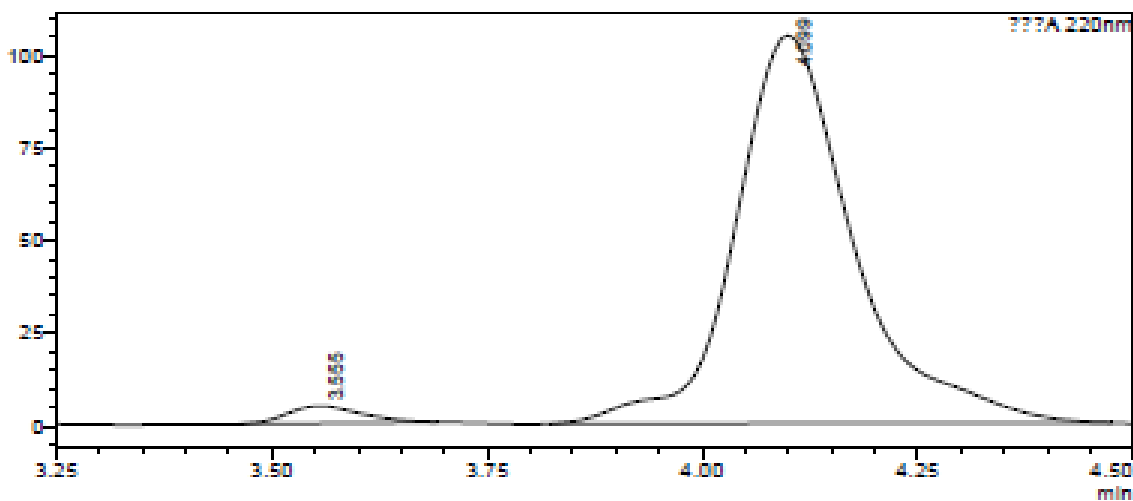

<Peak Table>

??A 220nm

| Peak# | Ret. Time | Area    | Height | Conc.  | Unit | Mark | Name |
|-------|-----------|---------|--------|--------|------|------|------|
| 1     | 3.555     | 27577   | 4637   | 2.683  |      |      |      |
| 2     | 4.099     | 1000386 | 104856 | 97.317 |      |      |      |
| Total |           | 1027964 | 109494 |        |      |      |      |

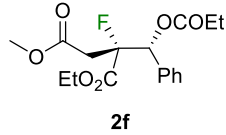

<Chromatogram>

mV

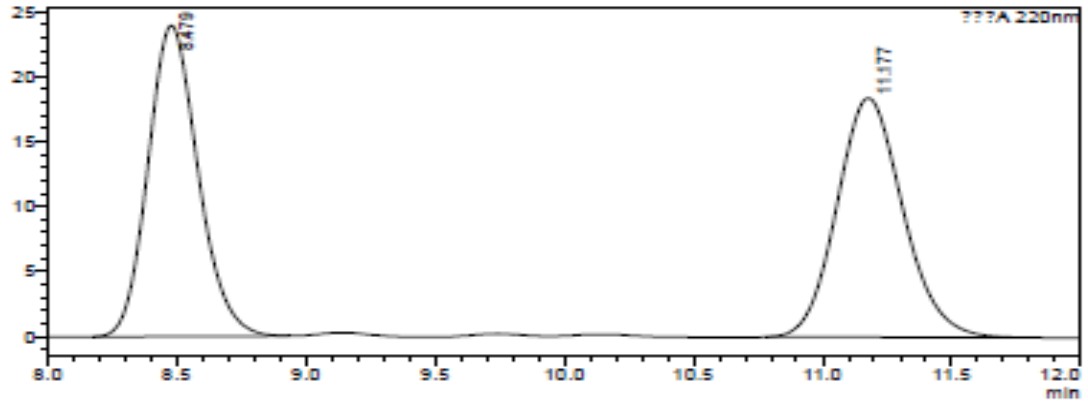

<Peak Table>

??A 220nm

| Peak# | Ret. Time | Area   | Height | Conc.  | Unit | Mark | Name |
|-------|-----------|--------|--------|--------|------|------|------|
| 1     | 8.479     | 322918 | 23914  | 49.695 |      | M    |      |
| 2     | 11.177    | 326887 | 18381  | 50.305 |      | M    |      |
| Total |           | 649805 | 42295  |        |      |      |      |

<Chromatogram>

mV

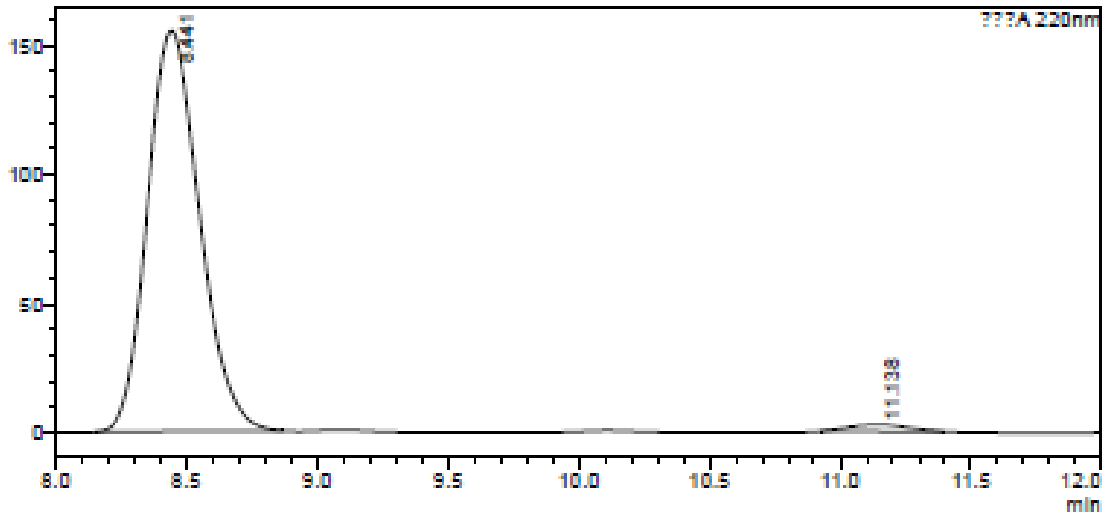

<Peak Table>

??A 220nm

| Peak# | Ret. Time | Area    | Height | Conc.  | Unit | Mark | Name |
|-------|-----------|---------|--------|--------|------|------|------|
| 1     | 8.441     | 2160208 | 156384 | 98.087 |      |      |      |
| 2     | 11.138    | 42135   | 2833   | 1.913  |      | M    |      |
| Total |           | 2202343 | 158217 |        |      |      |      |

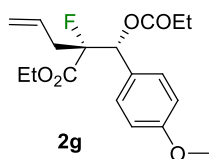

<Chromatogram>

mV

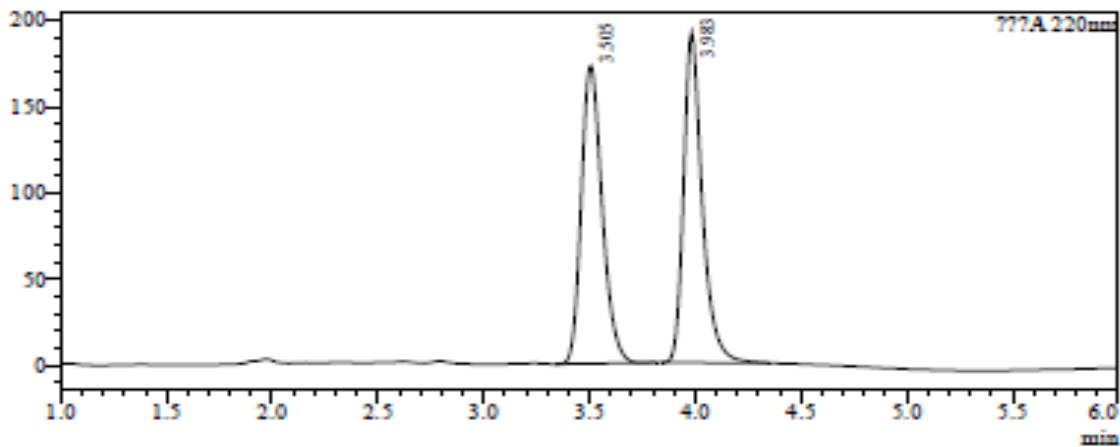

<Peak Table>

777A 220nm

| Peak# | Ret. Time | Area    | Height | Conc.  | Unit | Mark | Name |
|-------|-----------|---------|--------|--------|------|------|------|
| 1     | 3.505     | 1175478 | 172553 | 50.018 |      |      |      |
| 2     | 3.983     | 1174647 | 191551 | 49.982 |      | M    |      |
| Total |           | 2350125 | 364103 |        |      |      |      |

<Chromatogram>

mV

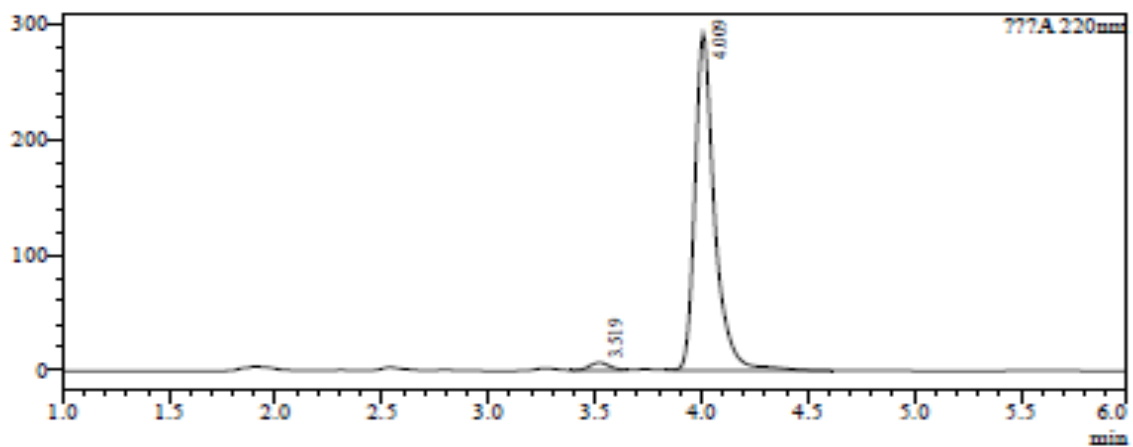

<Peak Table>

777A 220nm

| Peak# | Ret. Time | Area    | Height | Conc.  | Unit | Mark | Name |
|-------|-----------|---------|--------|--------|------|------|------|
| 1     | 3.519     | 41757   | 6562   | 2.180  |      |      |      |
| 2     | 4.009     | 1873749 | 290848 | 97.820 |      |      |      |
| Total |           | 1915506 | 297410 |        |      |      |      |



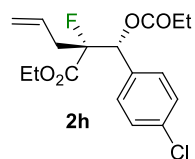

<Chromatogram>

mV

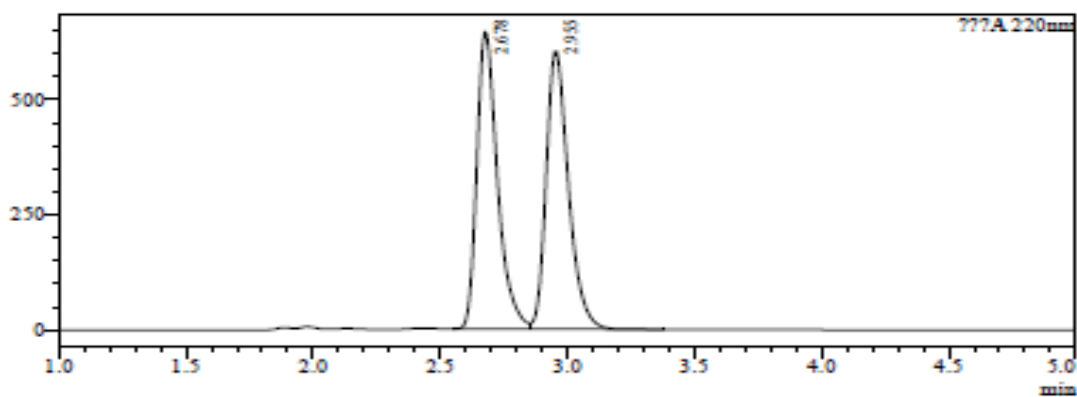

<Peak Table>

777A.220nm

| Peak# | Ret. Time | Area    | Height  | Conc.  | Unit | Mark | Name |
|-------|-----------|---------|---------|--------|------|------|------|
| 1     | 2.678     | 3644707 | 644052  | 49.743 |      |      |      |
| 2     | 2.955     | 3682321 | 602814  | 50.257 |      | V    |      |
| Total |           | 7327029 | 1246866 |        |      |      |      |

<Chromatogram>

mV

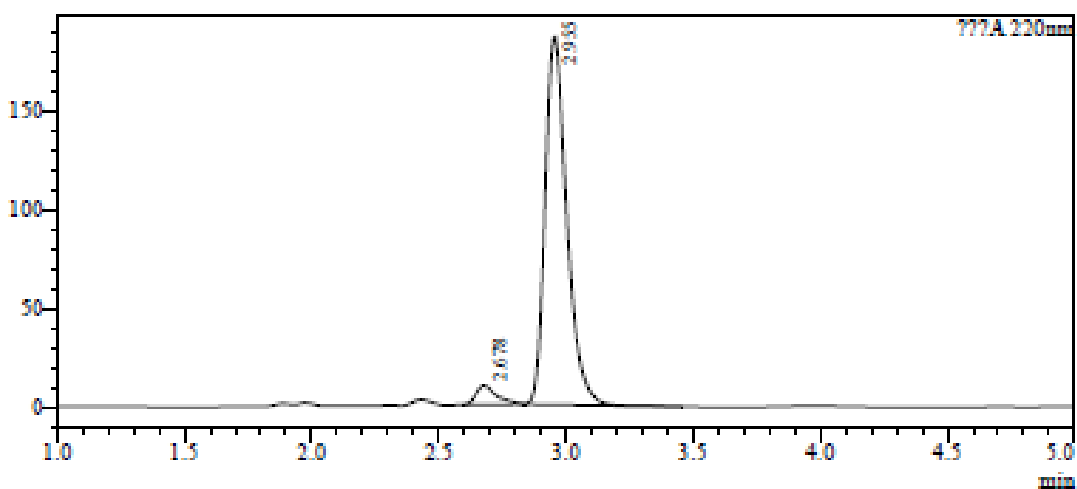

<Peak Table>

777A.220nm

| Peak# | Ret. Time | Area    | Height | Conc.  | Unit | Mark | Name |
|-------|-----------|---------|--------|--------|------|------|------|
| 1     | 2.678     | 53664   | 9567   | 4.626  |      | M    |      |
| 2     | 2.955     | 1106410 | 186148 | 95.374 |      |      |      |
| Total |           | 1160074 | 195715 |        |      |      |      |

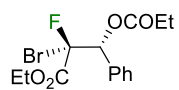

2i

<Chromatogram>

mV

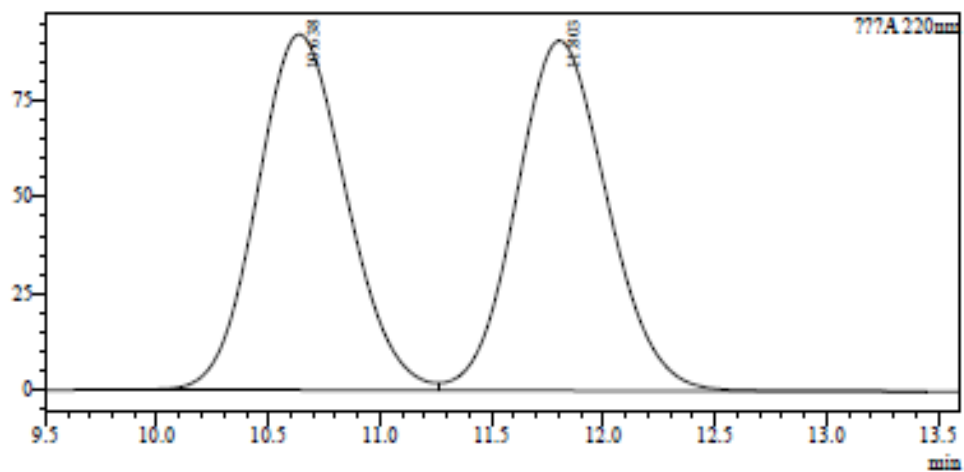

<Peak Table>

777A 220nm

| Peak# | Ret. Time | Area    | Height | Conc.  | Unit | Mark | Name |
|-------|-----------|---------|--------|--------|------|------|------|
| 1     | 10.638    | 2551631 | 91902  | 49.878 |      |      |      |
| 2     | 11.803    | 2564147 | 90418  | 50.122 |      | SV   |      |
| Total |           | 5115778 | 182320 |        |      |      |      |

<Chromatogram>

mV

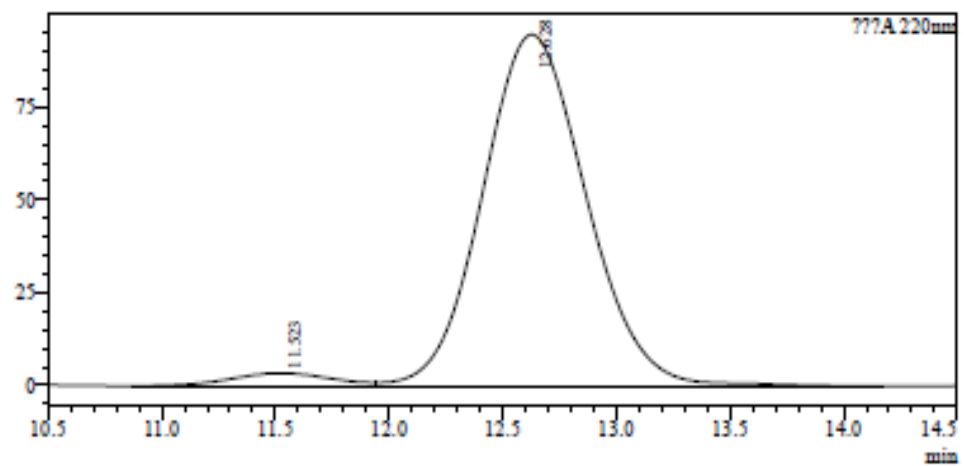

<Peak Table>

777A 220nm

| Peak# | Ret. Time | Area    | Height | Conc.  | Unit | Mark | Name |
|-------|-----------|---------|--------|--------|------|------|------|
| 1     | 11.523    | 104201  | 3438   | 3.357  |      |      |      |
| 2     | 12.628    | 3000239 | 94787  | 96.643 |      | V    |      |
| Total |           | 3104440 | 98225  |        |      |      |      |

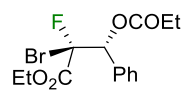

2j

<Chromatogram>

mV

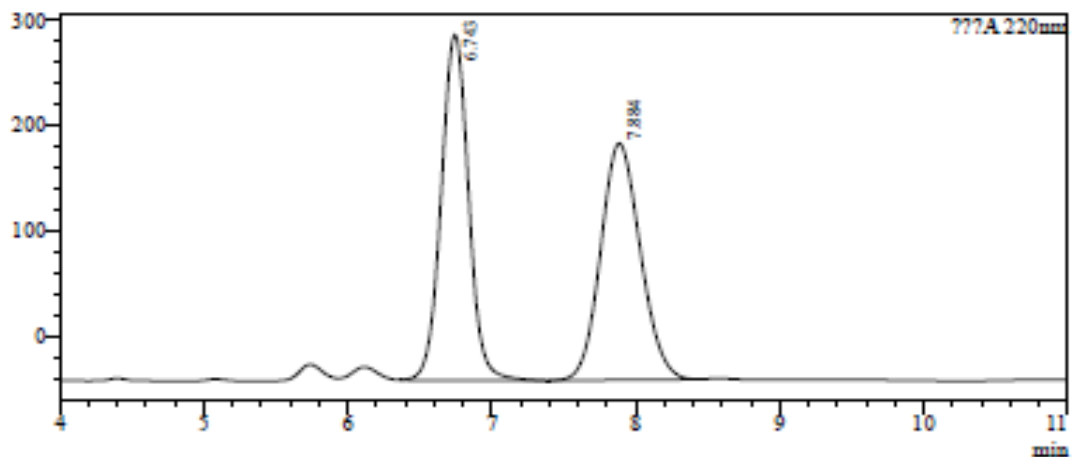

<Peak Table>

| Peak# | Ret. Time | Area    | Height | Conc.  | Unit | Mark | Name |
|-------|-----------|---------|--------|--------|------|------|------|
| 1     | 6.743     | 4326191 | 327126 | 50.204 |      |      |      |
| 2     | 7.884     | 4291058 | 224019 | 49.796 |      |      |      |
| Total |           | 8617249 | 551144 |        |      |      |      |

<Chromatogram>

mV

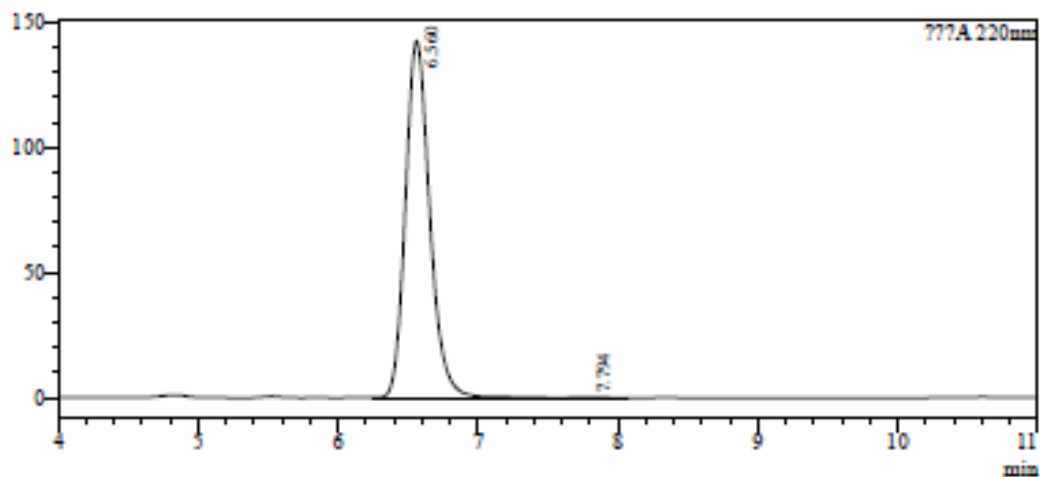

<Peak Table>

| Peak# | Ret. Time | Area    | Height | Conc.  | Unit | Mark | Name |
|-------|-----------|---------|--------|--------|------|------|------|
| 1     | 6.560     | 1725970 | 142436 | 99.924 |      | SV   |      |
| 2     | 7.794     | 1319    | 107    | 0.076  |      | T    |      |
| Total |           | 1727289 | 142543 |        |      |      |      |

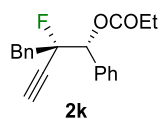

<Chromatogram>

mV

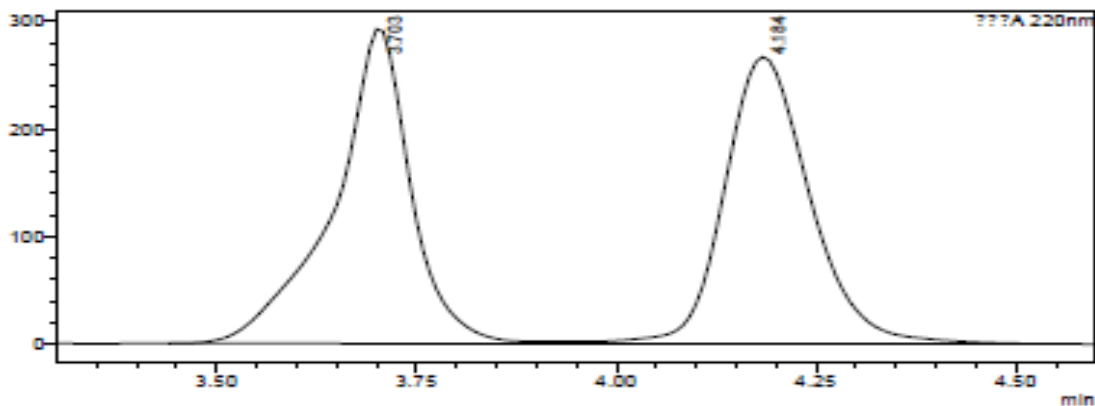

<Peak Table>

???A 220nm

| Peak# | Ret. Time | Area    | Height | Conc.  | Unit | Mark | Name |
|-------|-----------|---------|--------|--------|------|------|------|
| 1     | 3.703     | 1962597 | 291795 | 49.723 |      |      |      |
| 2     | 4.184     | 1984436 | 266370 | 50.277 |      | V    |      |
| Total |           | 3947032 | 558165 |        |      |      |      |

<Chromatogram>

mV

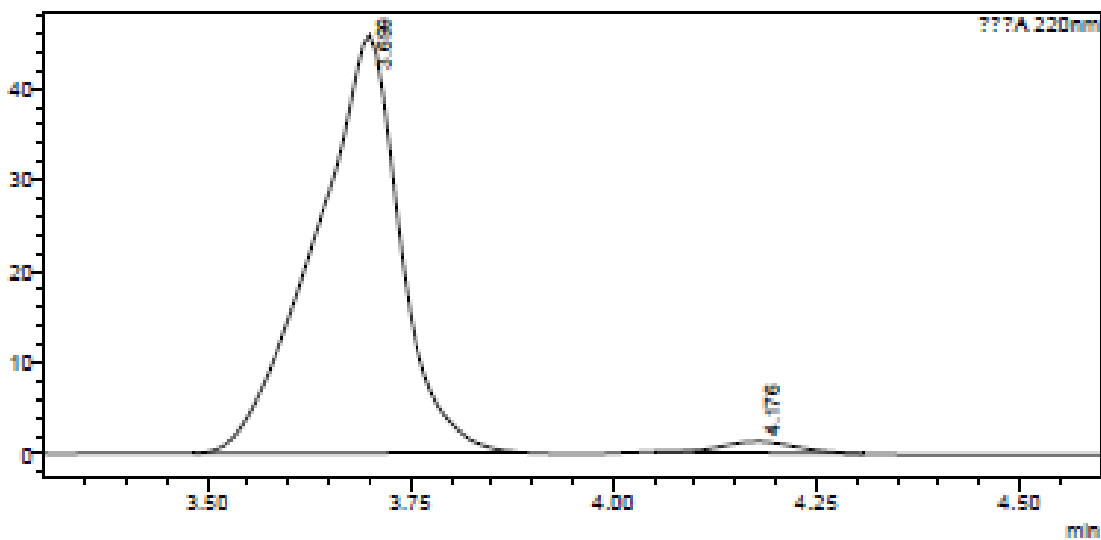

<Peak Table>

???A 220nm

| Peak# | Ret. Time | Area   | Height | Conc.  | Unit | Mark | Name |
|-------|-----------|--------|--------|--------|------|------|------|
| 1     | 3.699     | 334403 | 45817  | 97.705 |      |      |      |
| 2     | 4.176     | 7854   | 1261   | 2.295  |      | M    |      |
| Total |           | 342257 | 47078  |        |      |      |      |

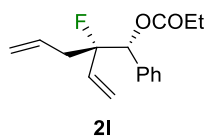

<Chromatogram>

mV

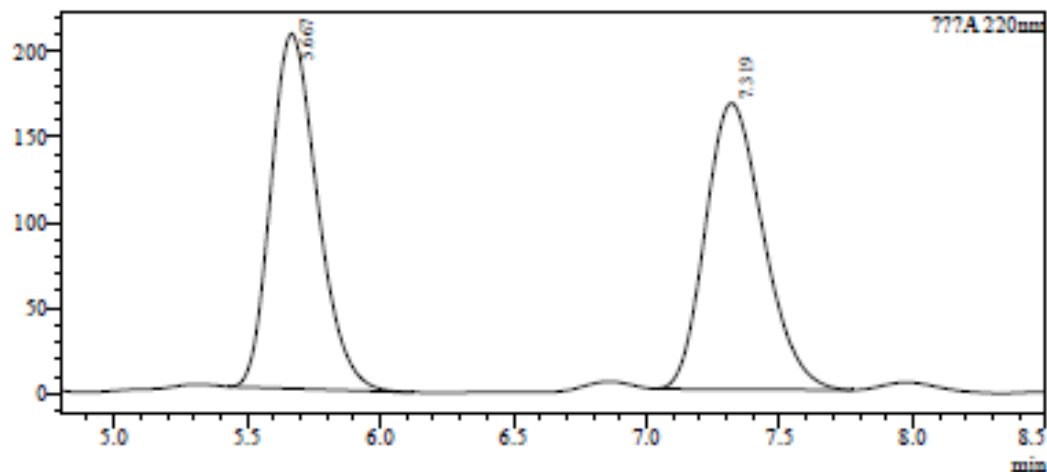

<Peak Table>

??A 220nm

| Peak# | Ret. Time | Area    | Height | Conc.  | Unit | Mark | Name |
|-------|-----------|---------|--------|--------|------|------|------|
| 1     | 5.667     | 2526234 | 207828 | 49.879 |      |      |      |
| 2     | 7.319     | 2538524 | 167444 | 50.121 |      |      |      |
| Total |           | 5064758 | 375272 |        |      |      |      |

<Chromatogram>

mV

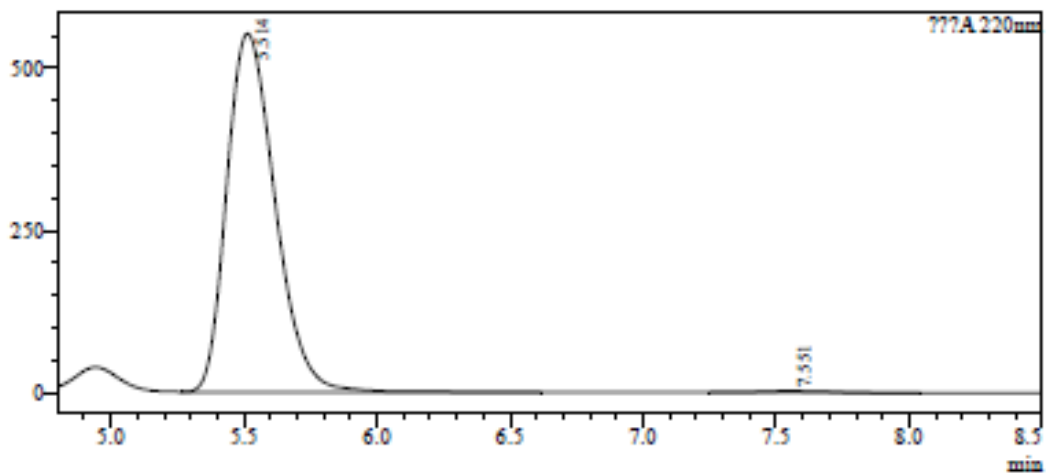

<Peak Table>

??A 220nm

| Peak# | Ret. Time | Area    | Height | Conc.  | Unit | Mark | Name |
|-------|-----------|---------|--------|--------|------|------|------|
| 1     | 5.514     | 6989045 | 552469 | 99.460 |      |      |      |
| 2     | 7.551     | 37923   | 2412   | 0.540  |      |      |      |
| Total |           | 7026968 | 554881 |        |      |      |      |

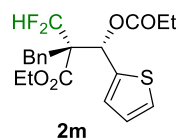

<Chromatogram>

mV

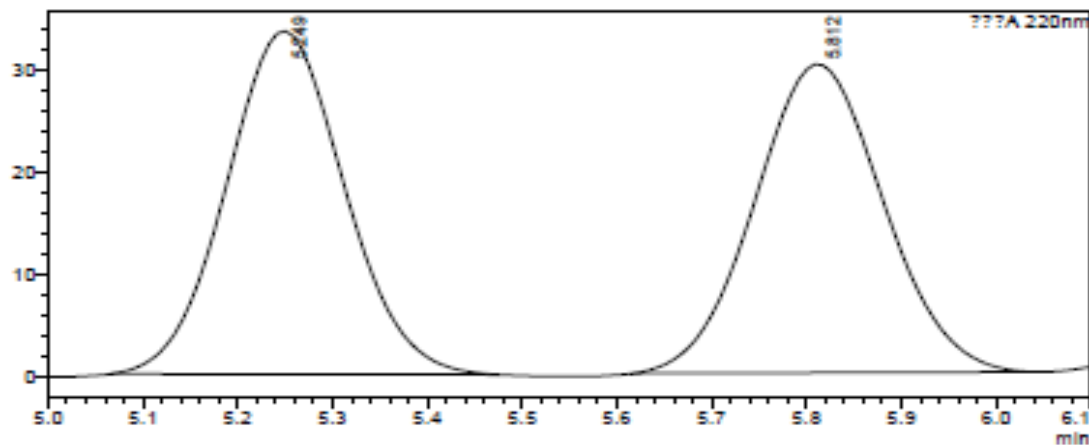

<Peak Table>

???A 220nm

| Peak# | Ret. Time | Area   | Height | Conc.  | Unit | Mark | Name |
|-------|-----------|--------|--------|--------|------|------|------|
| 1     | 5.249     | 289330 | 33472  | 50.427 |      |      |      |
| 2     | 5.812     | 284427 | 30062  | 49.573 |      |      |      |
| Total |           | 573757 | 63534  |        |      |      |      |

<Chromatogram>

mV

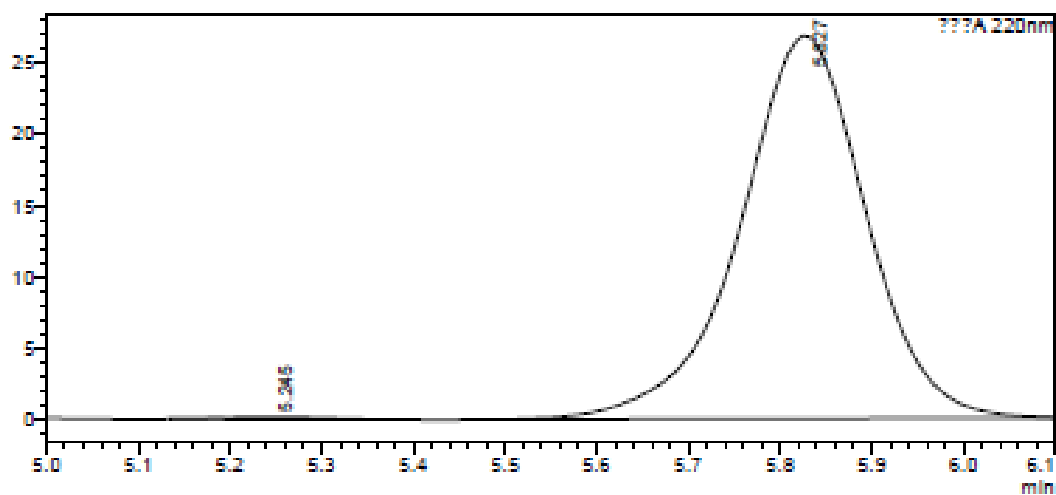

<Peak Table>

???A 220nm

| Peak# | Ret. Time | Area   | Height | Conc.  | Unit | Mark | Name |
|-------|-----------|--------|--------|--------|------|------|------|
| 1     | 5.245     | 1139   | 147    | 0.444  |      | M    |      |
| 2     | 5.827     | 255139 | 26684  | 99.556 |      | M    |      |
| Total |           | 256277 | 26831  |        |      |      |      |

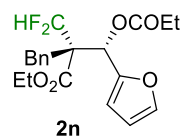

**<Chromatogram>**

mV

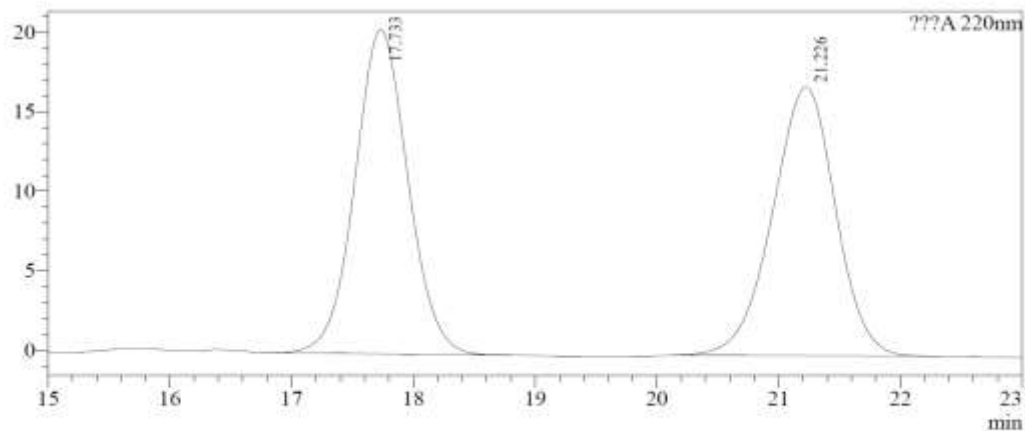

**<Peak Table>**

??A 220nm

| Peak# | Ret. Time | Area    | Height | Conc.  | Unit | Mark | Name |
|-------|-----------|---------|--------|--------|------|------|------|
| 1     | 17.733    | 619123  | 20398  | 50.424 |      |      |      |
| 2     | 21.226    | 608708  | 16922  | 49.576 |      |      |      |
| Total |           | 1227831 | 37320  |        |      |      |      |

**<Chromatogram>**

mV

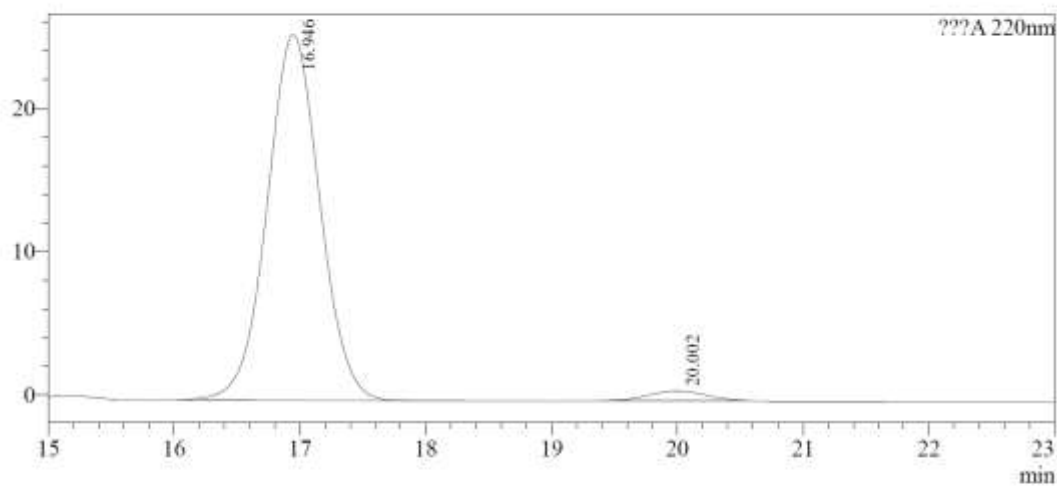

**<Peak Table>**

??A 220nm

| Peak# | Ret. Time | Area   | Height | Conc.  | Unit | Mark | Name |
|-------|-----------|--------|--------|--------|------|------|------|
| 1     | 16.946    | 744185 | 25509  | 97.228 |      |      |      |
| 2     | 20.002    | 21220  | 683    | 2.772  |      | M    |      |
| Total |           | 765404 | 26191  |        |      |      |      |

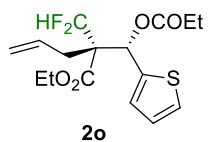

**<Chromatogram>**

mV

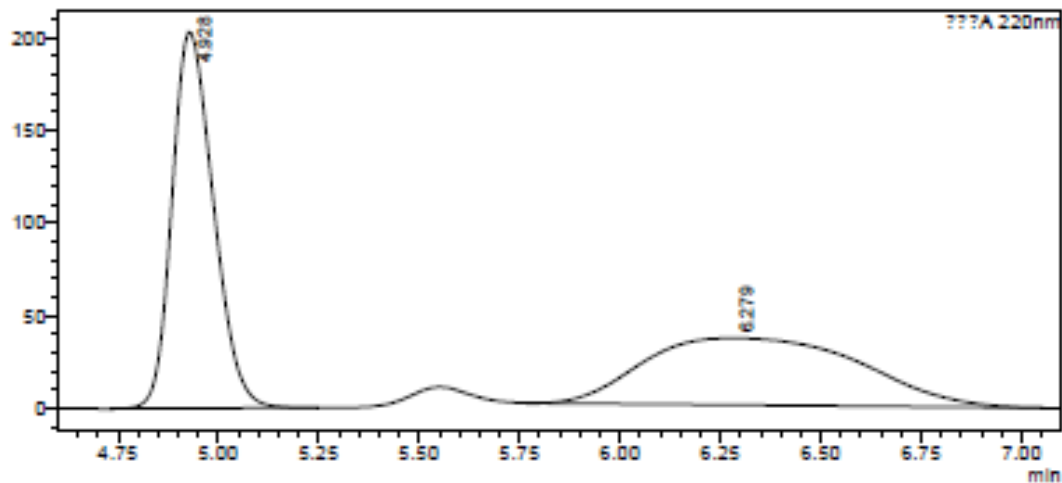

**<Peak Table>**

??A 220nm

| Peak# | Ret. Time | Area    | Height | Conc.  | Unit | Mark | Name |
|-------|-----------|---------|--------|--------|------|------|------|
| 1     | 4.928     | 1454034 | 202781 | 51.746 |      |      |      |
| 2     | 6.279     | 1355921 | 36031  | 48.254 |      | M    |      |
| Total |           | 2809955 | 238812 |        |      |      |      |

**<Chromatogram>**

mV

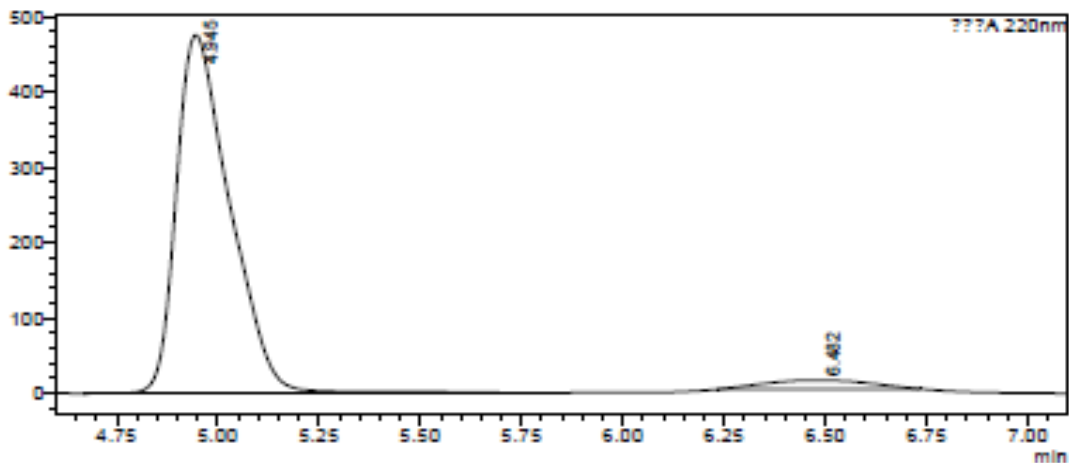

**<Peak Table>**

??A 220nm

| Peak# | Ret. Time | Area    | Height | Conc.  | Unit | Mark | Name |
|-------|-----------|---------|--------|--------|------|------|------|
| 1     | 4.945     | 4371827 | 474957 | 95.318 |      |      |      |
| 2     | 6.482     | 214750  | 11841  | 4.682  |      | M    |      |
| Total |           | 4586577 | 486798 |        |      |      |      |



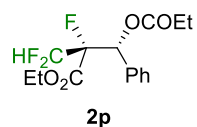

<Chromatogram>

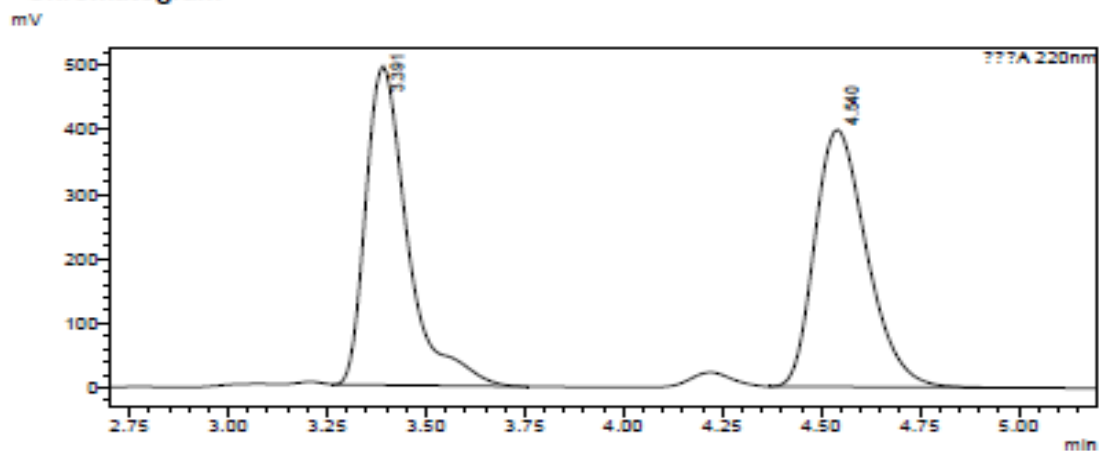

<Peak Table>

??A 220nm

| Peak# | Ret. Time | Area    | Height | Conc.  | Unit | Mark | Name |
|-------|-----------|---------|--------|--------|------|------|------|
| 1     | 3.391     | 3644962 | 494245 | 50.020 |      |      |      |
| 2     | 4.540     | 3642025 | 398744 | 49.980 |      |      |      |
| Total |           | 7286987 | 892989 |        |      |      |      |

<Chromatogram>

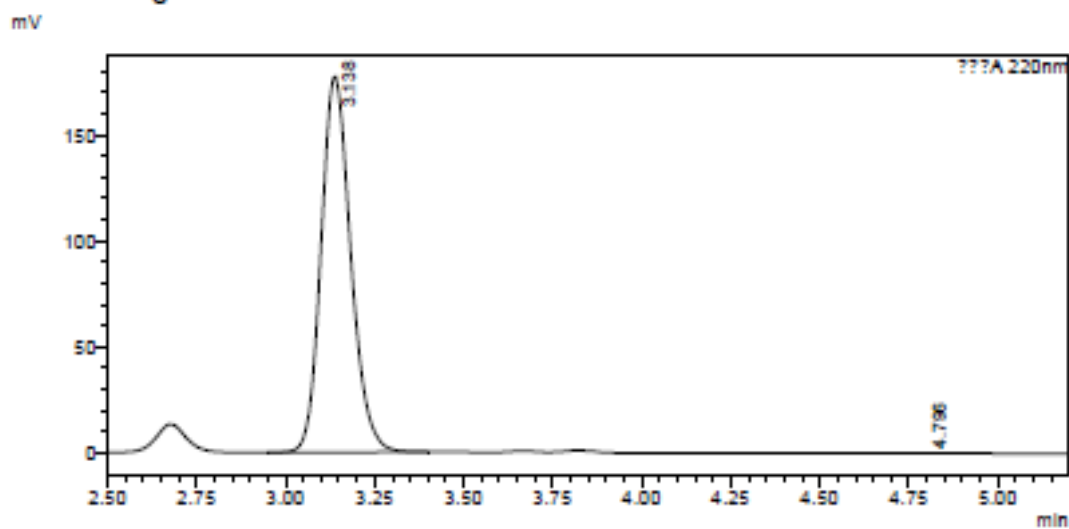

<Peak Table>

??A 220nm

| Peak# | Ret. Time | Area    | Height | Conc.  | Unit | Mark | Name |
|-------|-----------|---------|--------|--------|------|------|------|
| 1     | 3.138     | 1025314 | 176827 | 99.763 |      |      |      |
| 2     | 4.796     | 2440    | 187    | 0.237  |      | M    |      |
| Total |           | 1027754 | 177014 |        |      |      |      |

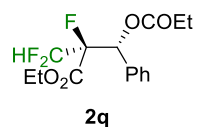

<Chromatogram>

mV

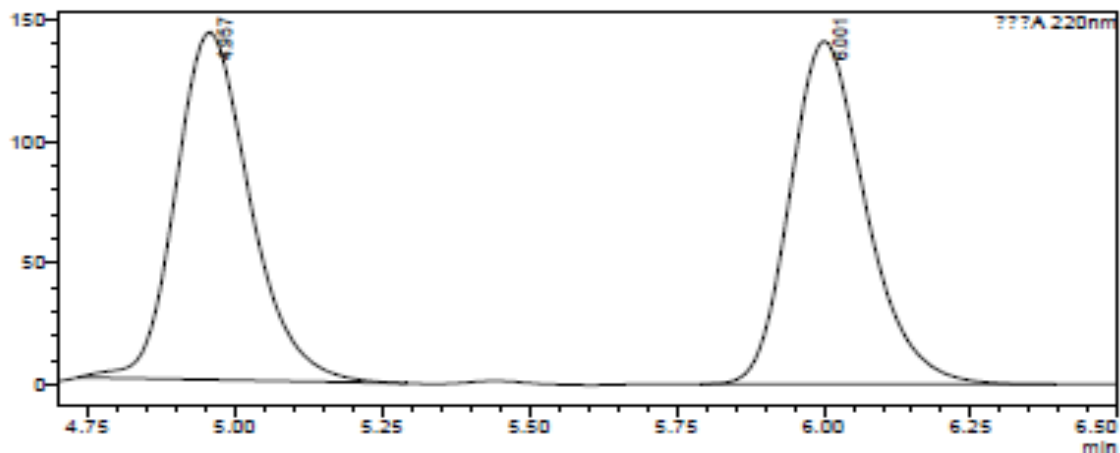

<Peak Table>

???A 220nm

| Peak# | Ret. Time | Area    | Height | Conc.  | Unit | Mark | Name |
|-------|-----------|---------|--------|--------|------|------|------|
| 1     | 4.957     | 1254261 | 142643 | 49.890 |      | M    |      |
| 2     | 6.001     | 1259811 | 140792 | 50.110 |      |      |      |
| Total |           | 2514073 | 283435 |        |      |      |      |

<Chromatogram>

mV

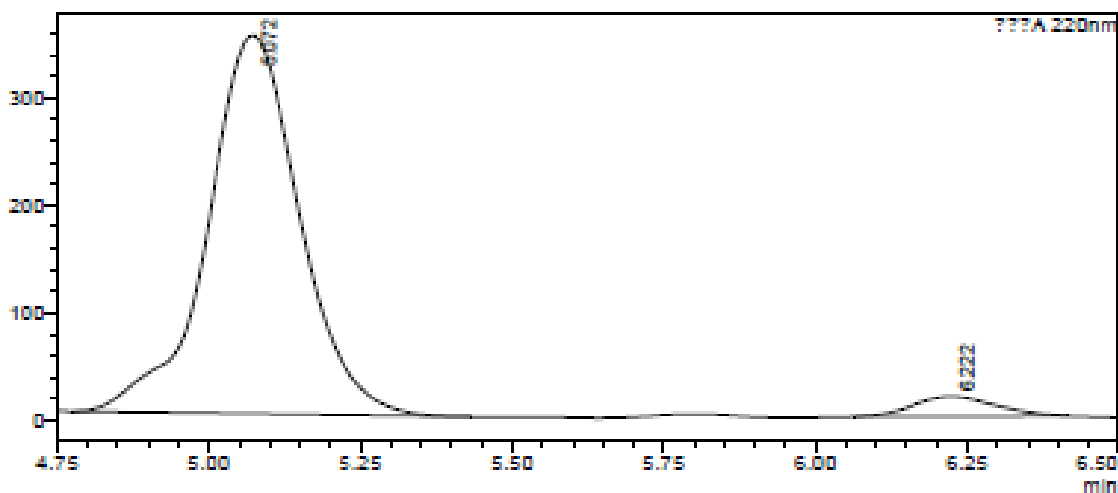

<Peak Table>

???A 220nm

| Peak# | Ret. Time | Area    | Height | Conc.  | Unit | Mark | Name |
|-------|-----------|---------|--------|--------|------|------|------|
| 1     | 5.072     | 3713900 | 351484 | 95.609 |      |      |      |
| 2     | 6.222     | 170567  | 18271  | 4.391  |      | M    |      |
| Total |           | 3884467 | 369755 |        |      |      |      |

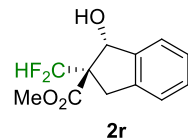

<Chromatogram>

mV

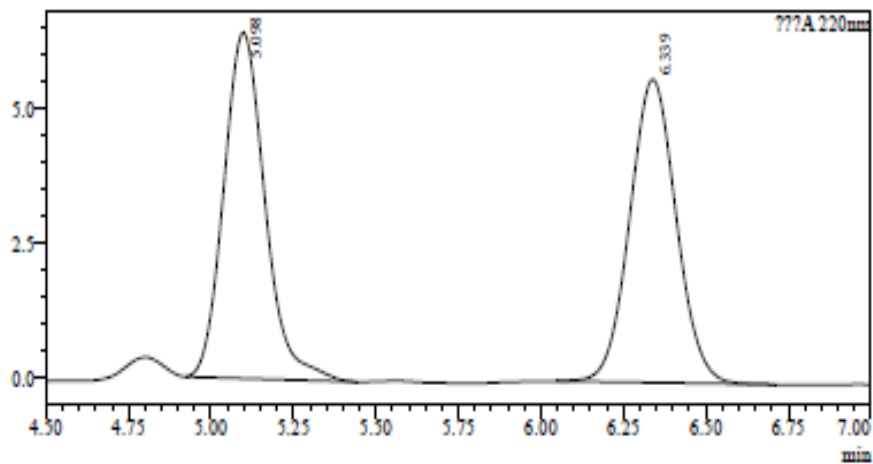

<Peak Table>

777A 220nm

| Peak# | Ret. Time | Area   | Height | Conc.  | Unit | Mark | Name |
|-------|-----------|--------|--------|--------|------|------|------|
| 1     | 5.098     | 55881  | 6432   | 50.302 |      |      |      |
| 2     | 6.339     | 55209  | 5632   | 49.698 |      |      |      |
| Total |           | 111091 | 12065  |        |      |      |      |

<Chromatogram>

mV

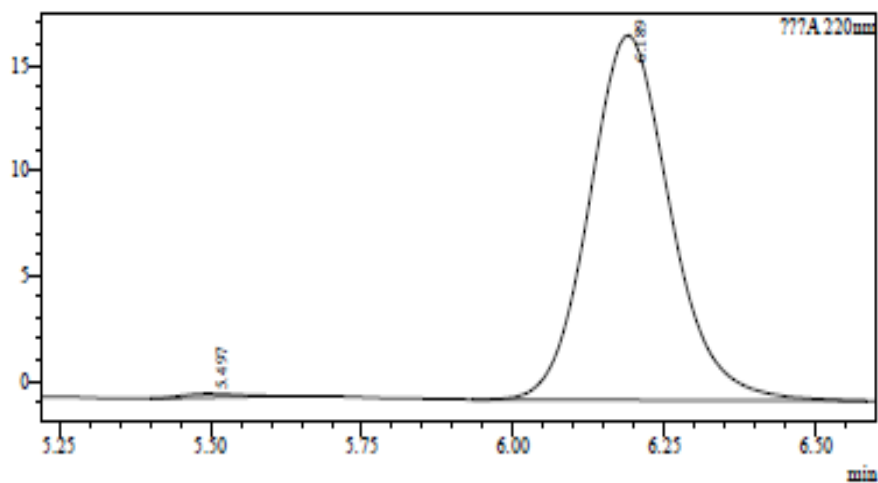

<Peak Table>

777A 220nm

| Peak# | Ret. Time | Area   | Height | Conc.  | Unit | Mark | Name |
|-------|-----------|--------|--------|--------|------|------|------|
| 1     | 5.497     | 1146   | 177    | 0.704  |      |      |      |
| 2     | 6.189     | 161517 | 17333  | 99.296 |      | M    |      |
| Total |           | 162663 | 17510  |        |      |      |      |

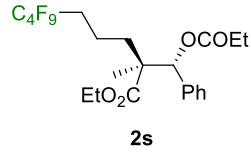

<Chromatogram>

mV

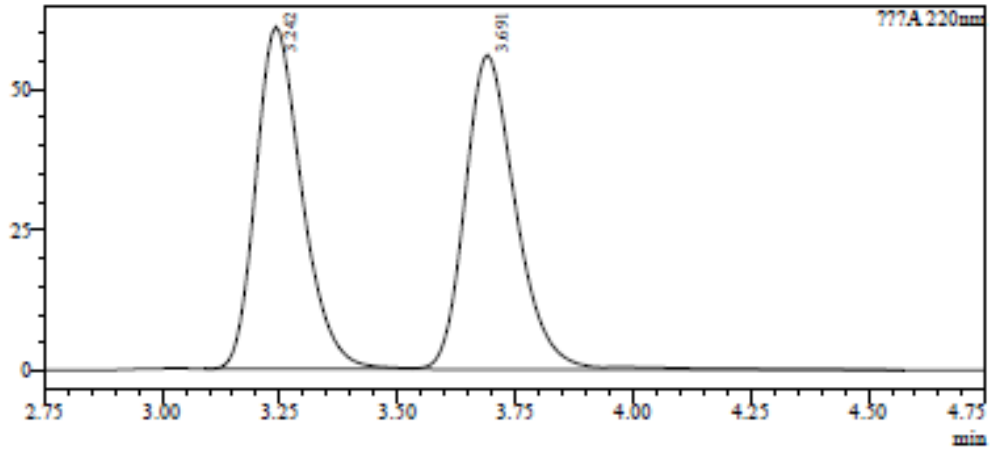

<Peak Table>

777A 220nm

| Peak# | Ret. Time | Area   | Height | Conc.  | Unit | Mark | Name |
|-------|-----------|--------|--------|--------|------|------|------|
| 1     | 3.242     | 412978 | 60642  | 49.693 |      |      |      |
| 2     | 3.691     | 418080 | 55685  | 50.307 |      | SV   |      |
| Total |           | 831058 | 116327 |        |      |      |      |

<Chromatogram>

mV

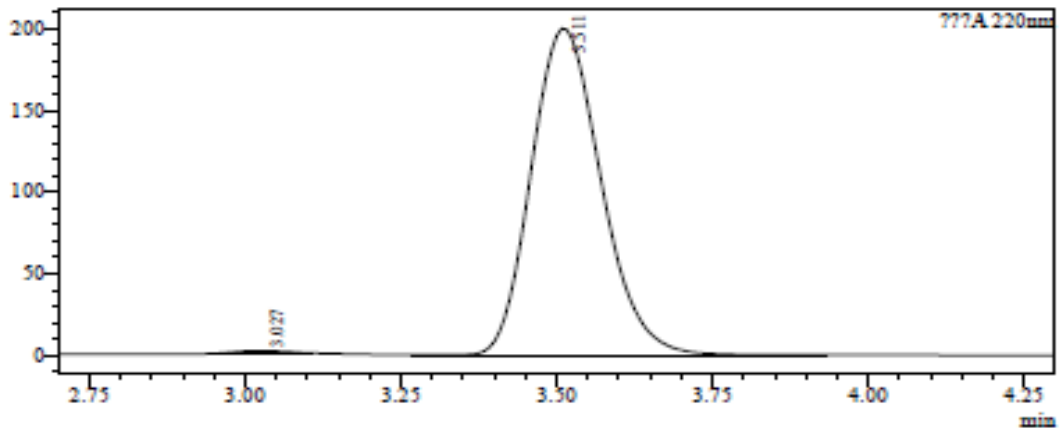

<Peak Table>

777A 220nm

| Peak# | Ret. Time | Area    | Height | Conc.  | Unit | Mark | Name |
|-------|-----------|---------|--------|--------|------|------|------|
| 1     | 3.027     | 7531    | 1413   | 0.483  |      | M    |      |
| 2     | 3.511     | 1552243 | 199412 | 99.517 |      |      |      |
| Total |           | 1559774 | 200825 |        |      |      |      |

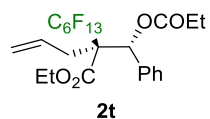

<Chromatogram>

mV

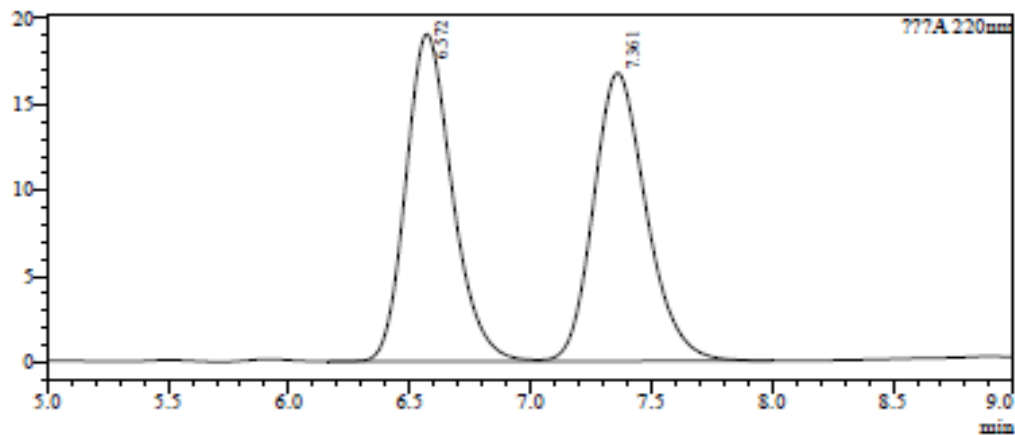

<Peak Table>

777A 220nm

| Peak# | Ret. Time | Area   | Height | Conc.  | Unit | Mark | Name |
|-------|-----------|--------|--------|--------|------|------|------|
| 1     | 6.572     | 254105 | 19016  | 49.970 |      |      |      |
| 2     | 7.361     | 254408 | 16746  | 50.030 |      | V    |      |
| Total |           | 508513 | 35762  |        |      |      |      |

<Chromatogram>

mV

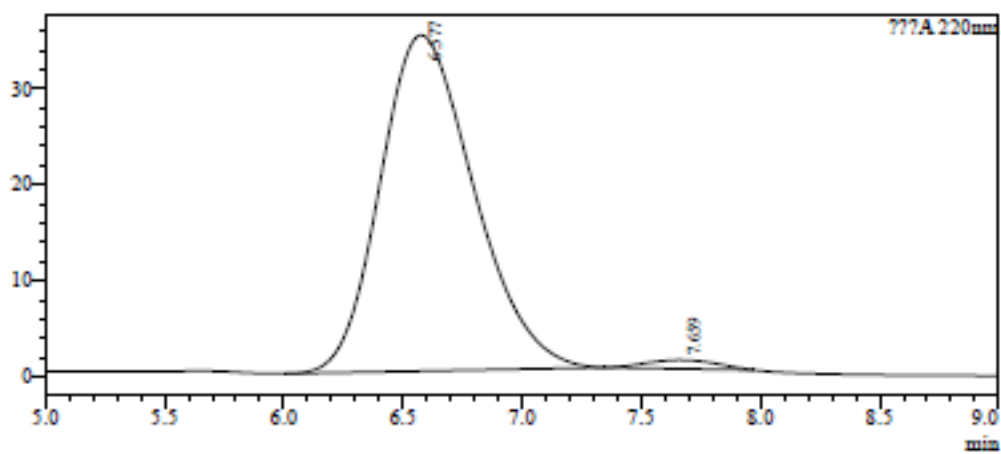

<Peak Table>

777A 220nm

| Peak# | Ret. Time | Area   | Height | Conc.  | Unit | Mark | Name |
|-------|-----------|--------|--------|--------|------|------|------|
| 1     | 6.577     | 955955 | 34945  | 98.099 |      |      |      |
| 2     | 7.659     | 18524  | 894    | 1.901  |      | M    |      |
| Total |           | 974479 | 35839  |        |      |      |      |

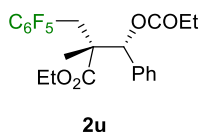

<Chromatogram>

mV

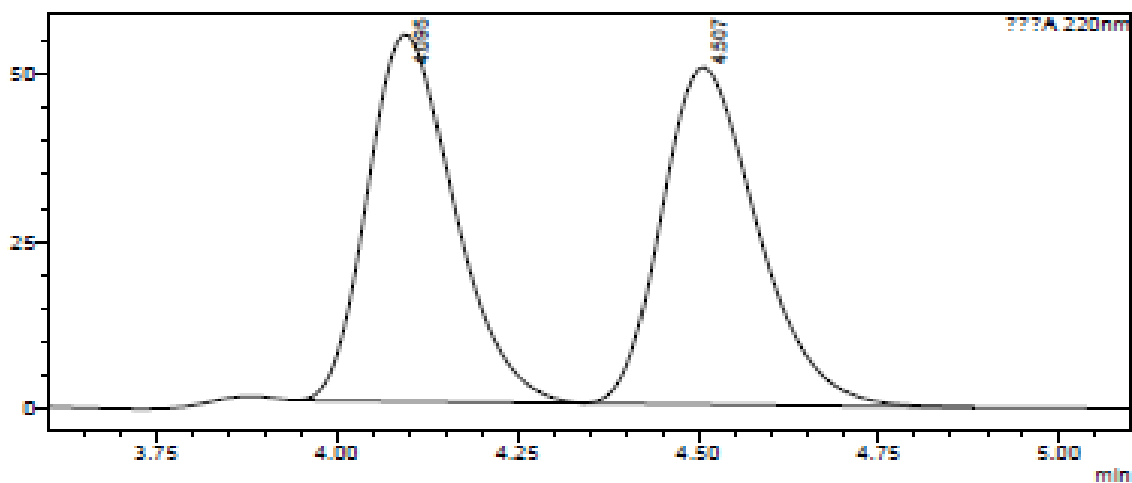

<Peak Table>

??A 220nm

| Peak# | Ret. Time | Area   | Height | Conc.  | Unit | Mark | Name |
|-------|-----------|--------|--------|--------|------|------|------|
| 1     | 4.095     | 457175 | 54910  | 49.474 |      |      |      |
| 2     | 4.507     | 466901 | 50467  | 50.526 |      | V    |      |
| Total |           | 924075 | 105377 |        |      |      |      |

<Chromatogram>

mV

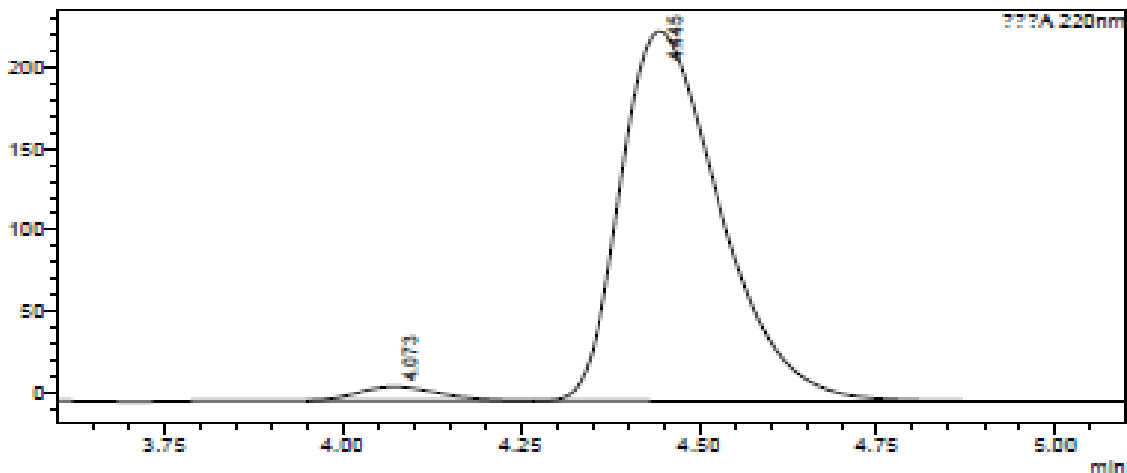

<Peak Table>

??A 220nm

| Peak# | Ret. Time | Area    | Height | Conc.  | Unit | Mark | Name |
|-------|-----------|---------|--------|--------|------|------|------|
| 1     | 4.073     | 66100   | 8448   | 2.906  |      |      |      |
| 2     | 4.445     | 2208902 | 227874 | 97.094 |      |      |      |
| Total |           | 2275003 | 236322 |        |      |      |      |

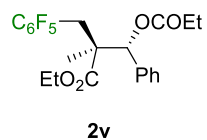

<Chromatogram>

mV

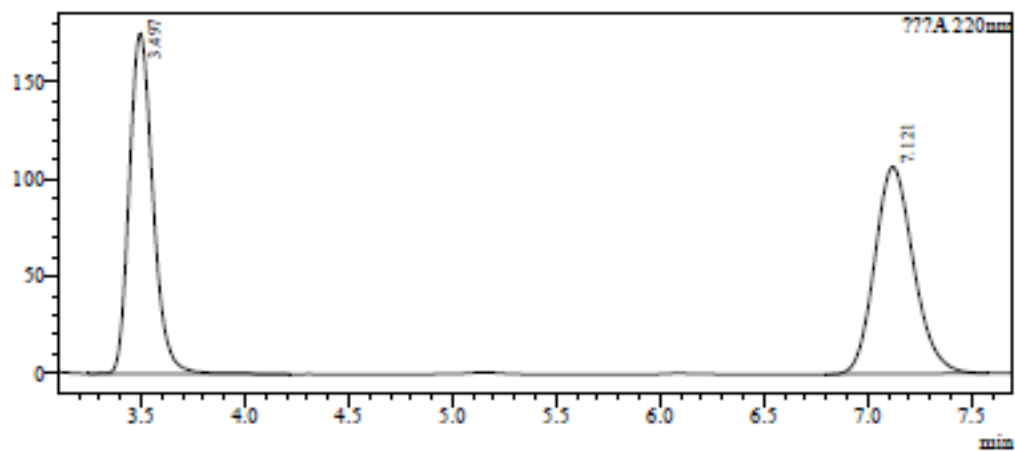

<Peak Table>

| Peak# | Ret. Time | Area    | Height | Conc.  | Unit | Mark | Name |
|-------|-----------|---------|--------|--------|------|------|------|
| 1     | 3.497     | 1388017 | 175042 | 50.055 |      | S    |      |
| 2     | 7.121     | 1384980 | 106342 | 49.945 |      |      |      |
| Total |           | 2772998 | 281384 |        |      |      |      |

<Chromatogram>

mV

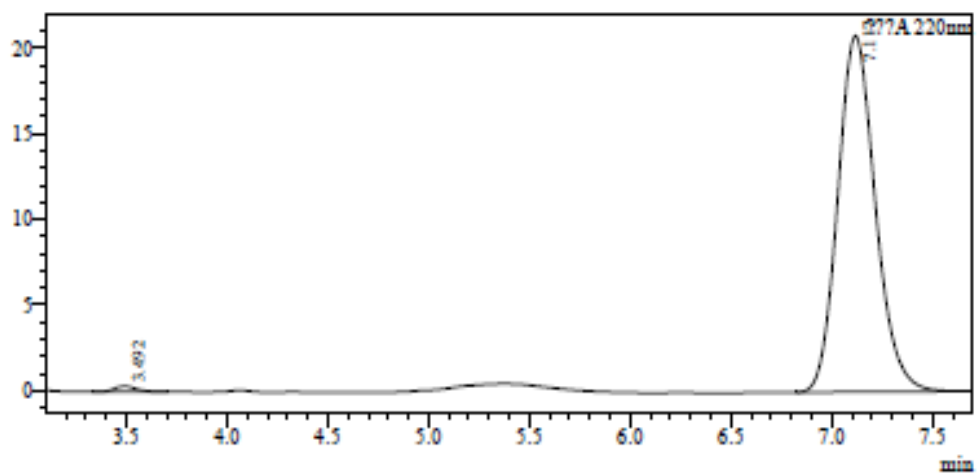

<Peak Table>

| Peak# | Ret. Time | Area   | Height | Conc.  | Unit | Mark | Name |
|-------|-----------|--------|--------|--------|------|------|------|
| 1     | 3.492     | 2502   | 326    | 0.920  |      |      |      |
| 2     | 7.117     | 269381 | 20821  | 99.080 |      | V    |      |
| Total |           | 271883 | 21147  |        |      |      |      |

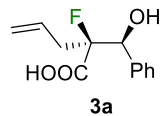

<Chromatogram>

mV

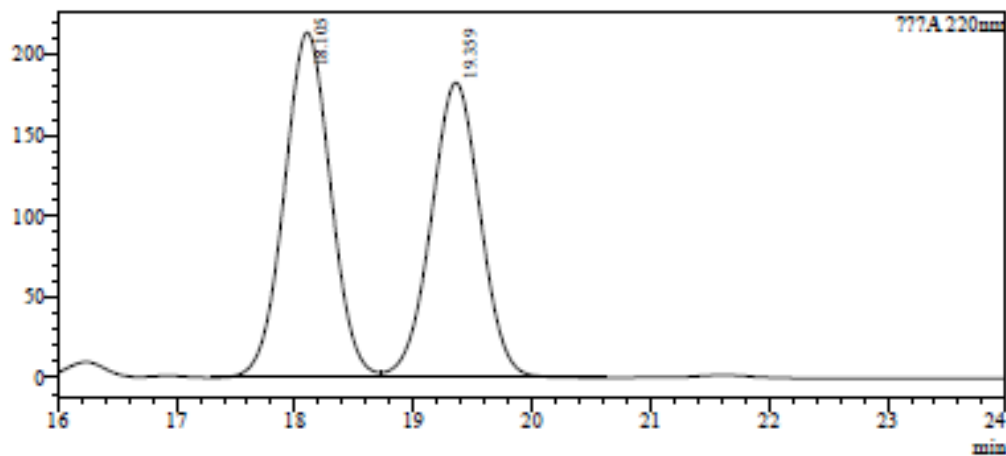

<Peak Table>

777A 220nm

| Peak# | Ret. Time | Area     | Height | Conc.  | Unit | Mark | Name |
|-------|-----------|----------|--------|--------|------|------|------|
| 1     | 18.105    | 5823757  | 213740 | 32.462 |      |      |      |
| 2     | 19.359    | 5277243  | 182808 | 47.538 |      | V    |      |
| Total |           | 11101000 | 396547 |        |      |      |      |

<Chromatogram>

mV

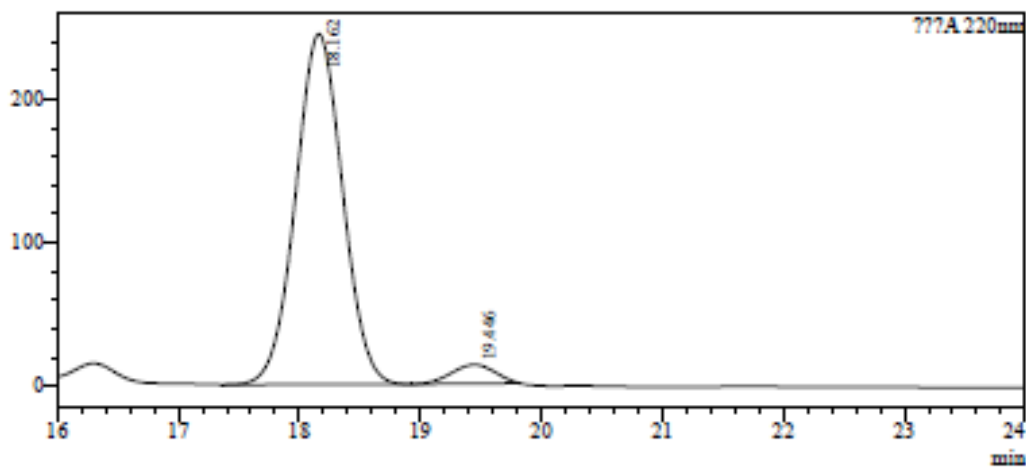

<Peak Table>

777A 220nm

| Peak# | Ret. Time | Area    | Height | Conc.  | Unit | Mark | Name |
|-------|-----------|---------|--------|--------|------|------|------|
| 1     | 18.162    | 6603485 | 244175 | 95.245 |      |      |      |
| 2     | 19.446    | 329677  | 13122  | 4.755  |      | M    |      |
| Total |           | 6933162 | 257297 |        |      |      |      |



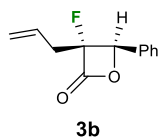

<Chromatogram>

mV

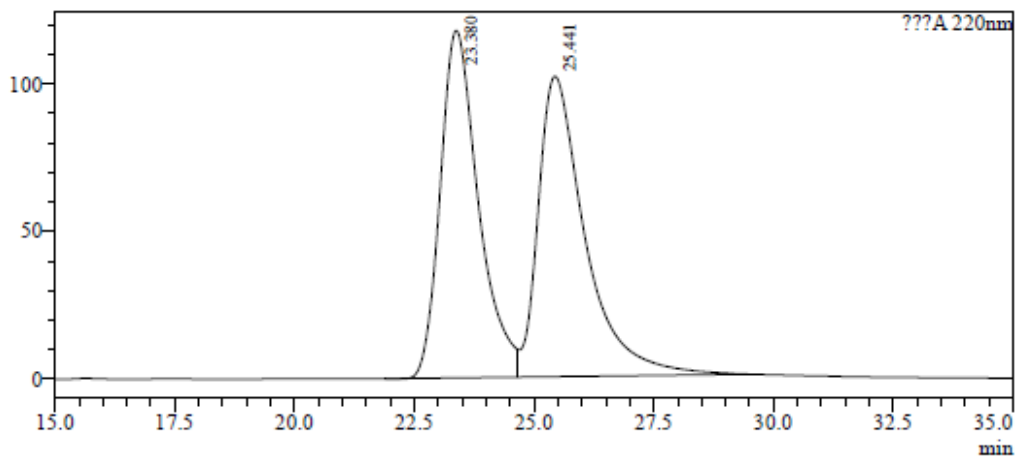

<Peak Table>

??A 220nm

| Peak# | Ret. Time | Area     | Height | Conc.  | Unit | Mark | Name |
|-------|-----------|----------|--------|--------|------|------|------|
| 1     | 23.380    | 6534230  | 117838 | 48.503 |      | M    |      |
| 2     | 25.441    | 6937677  | 101860 | 51.497 |      | VM   |      |
| Total |           | 13471907 | 219698 |        |      |      |      |

<Chromatogram>

mV

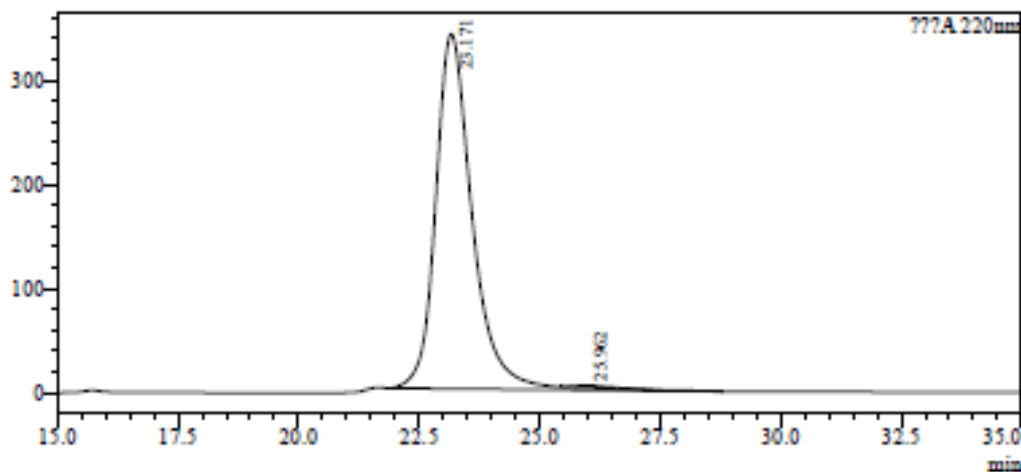

<Peak Table>

??A 220nm

| Peak# | Ret. Time | Area     | Height | Conc.  | Unit | Mark | Name |
|-------|-----------|----------|--------|--------|------|------|------|
| 1     | 23.171    | 18068731 | 340116 | 99.427 |      | S    |      |
| 2     | 25.962    | 104165   | 1878   | 0.573  |      | T    |      |
| Total |           | 18172896 | 341994 |        |      |      |      |

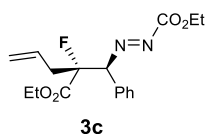

<Chromatogram>

mV

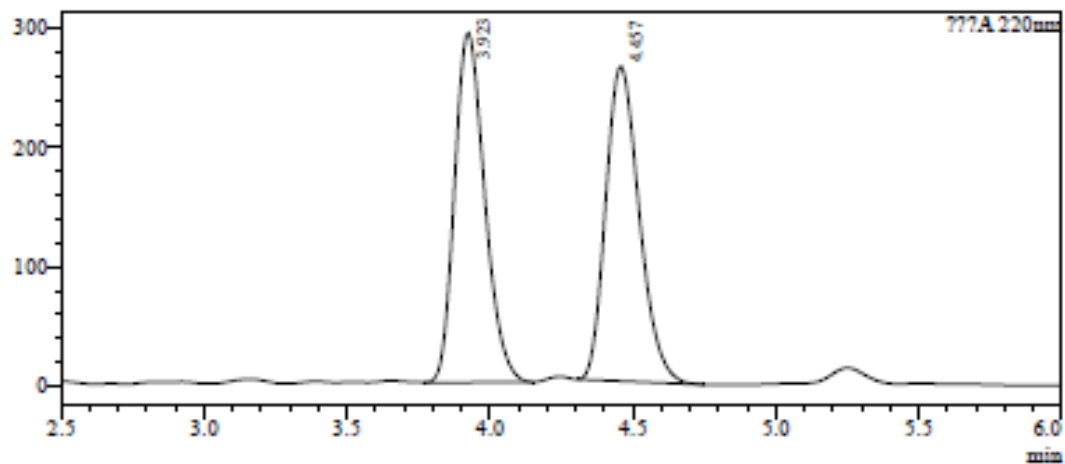

<Peak Table>

777A 220nm

| Peak# | Ret. Time | Area    | Height | Conc.  | Unit | Mark | Name |
|-------|-----------|---------|--------|--------|------|------|------|
| 1     | 3.923     | 2146964 | 293294 | 49.841 |      |      |      |
| 2     | 4.457     | 2160692 | 264324 | 50.159 |      |      |      |
| Total |           | 4307656 | 557618 |        |      |      |      |

<Chromatogram>

mV

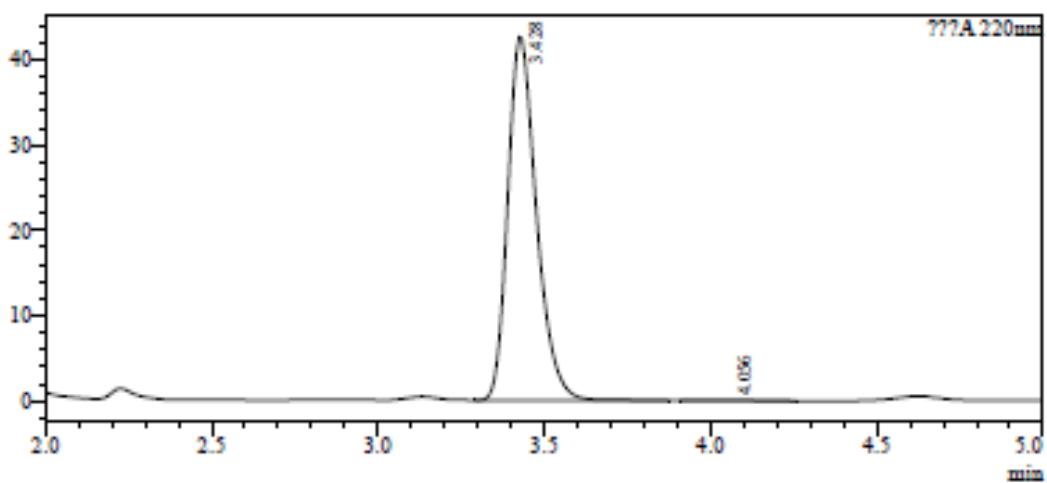

<Peak Table>

777A 220nm

| Peak# | Ret. Time | Area   | Height | Conc.  | Unit | Mark | Name |
|-------|-----------|--------|--------|--------|------|------|------|
| 1     | 3.428     | 256201 | 42588  | 99.916 |      |      |      |
| 2     | 4.056     | 214    | 18     | 0.084  |      | M    |      |
| Total |           | 256415 | 42607  |        |      |      |      |

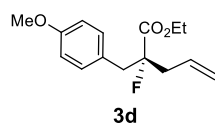

<Chromatogram>

mV

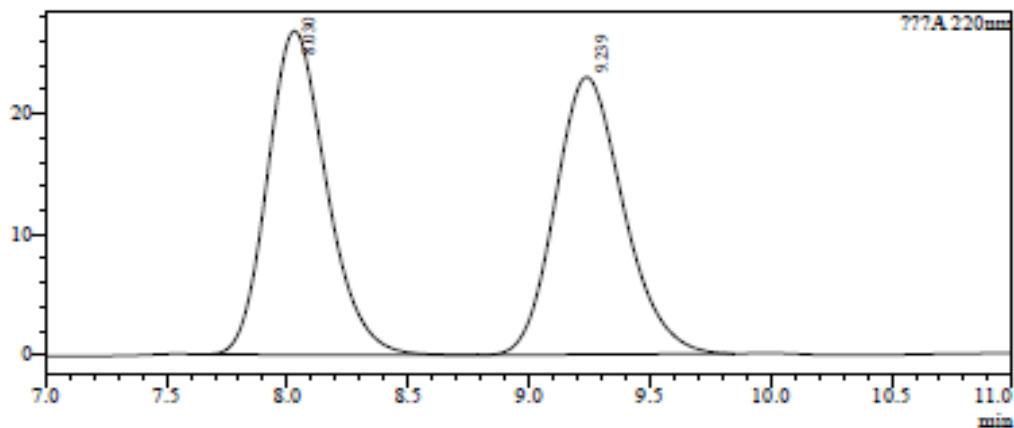

<Peak Table>

??A 220nm

| Peak# | Ret. Time | Area   | Height | Conc.  | Unit | Mark | Name |
|-------|-----------|--------|--------|--------|------|------|------|
| 1     | 8.030     | 456923 | 26856  | 50.250 |      |      |      |
| 2     | 9.239     | 452383 | 23006  | 49.750 |      |      |      |
| Total |           | 909306 | 49862  |        |      |      |      |

<Chromatogram>

mV

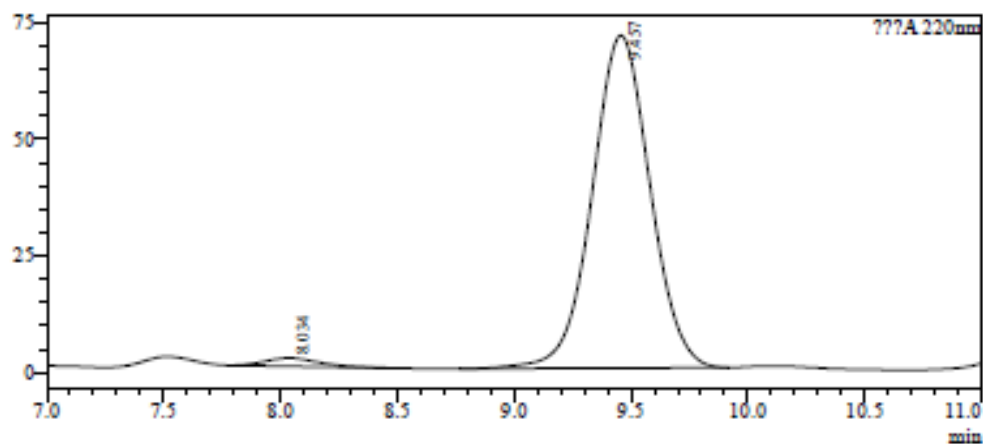

<Peak Table>

??A 220nm

| Peak# | Ret. Time | Area    | Height | Conc.  | Unit | Mark | Name |
|-------|-----------|---------|--------|--------|------|------|------|
| 1     | 8.034     | 28209   | 1760   | 2.242  |      |      |      |
| 2     | 9.457     | 1229896 | 71416  | 97.758 |      |      |      |
| Total |           | 1258104 | 73176  |        |      |      |      |

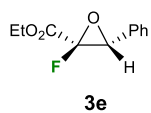

<Chromatogram>

mV

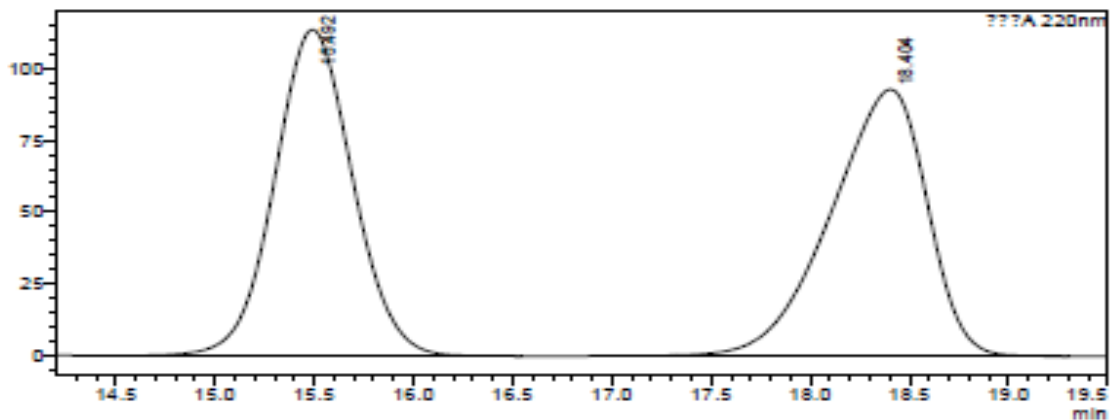

<Peak Table>

??A 220nm

| Peak# | Ret. Time | Area    | Height | Conc.  | Unit | Mark | Name |
|-------|-----------|---------|--------|--------|------|------|------|
| 1     | 15.492    | 3115010 | 113822 | 49.796 |      |      |      |
| 2     | 18.404    | 3140571 | 92903  | 50.204 |      |      |      |
| Total |           | 6255581 | 206725 |        |      |      |      |

<Chromatogram>

mV

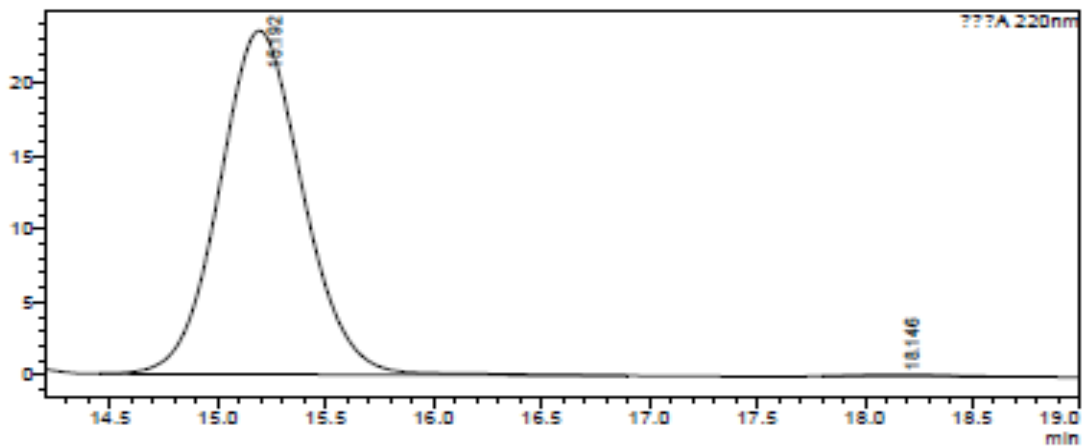

<Peak Table>

??A 220nm

| Peak# | Ret. Time | Area   | Height | Conc.  | Unit | Mark | Name |
|-------|-----------|--------|--------|--------|------|------|------|
| 1     | 15.192    | 636023 | 23566  | 99.504 |      |      |      |
| 2     | 18.146    | 3173   | 118    | 0.496  |      |      |      |
| Total |           | 639196 | 23684  |        |      |      |      |

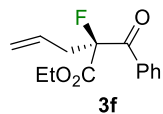

<Chromatogram>

mV

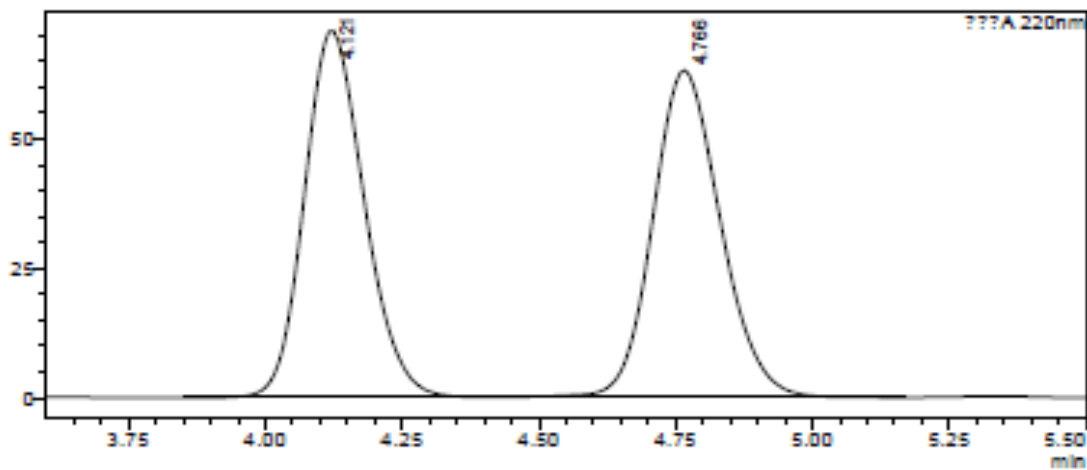

<Peak Table>

???A 220nm

| Peak# | Ret. Time | Area    | Height | Conc.  | Unit | Mark | Name |
|-------|-----------|---------|--------|--------|------|------|------|
| 1     | 4.121     | 539869  | 70797  | 49.785 |      |      |      |
| 2     | 4.766     | 544535  | 63202  | 50.215 |      | V    |      |
| Total |           | 1084404 | 133998 |        |      |      |      |

<Chromatogram>

mV

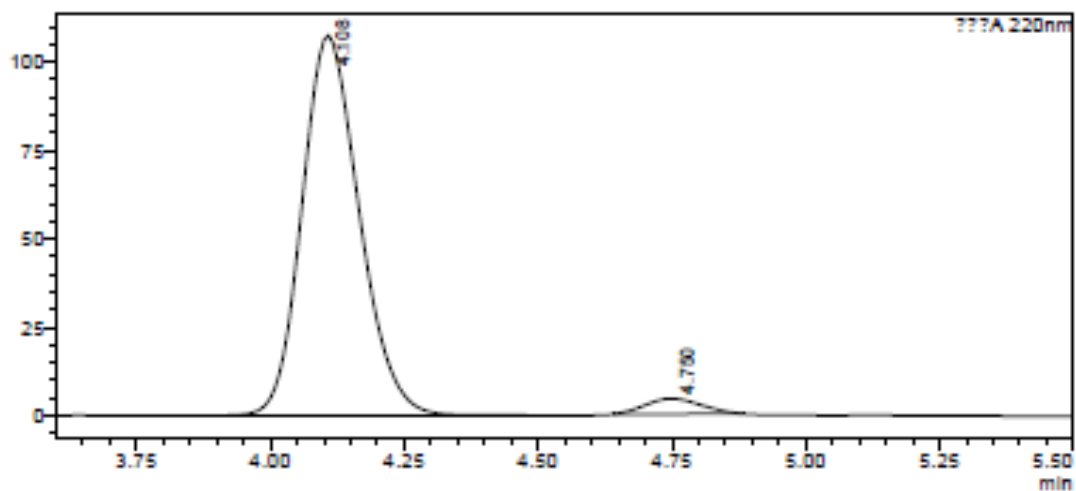

<Peak Table>

???A 220nm

| Peak# | Ret. Time | Area   | Height | Conc.  | Unit | Mark | Name |
|-------|-----------|--------|--------|--------|------|------|------|
| 1     | 4.108     | 800948 | 107483 | 96.222 |      |      |      |
| 2     | 4.750     | 31445  | 4330   | 3.778  |      | M    |      |
| Total |           | 832393 | 111813 |        |      |      |      |

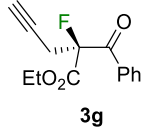

<Chromatogram>

mV

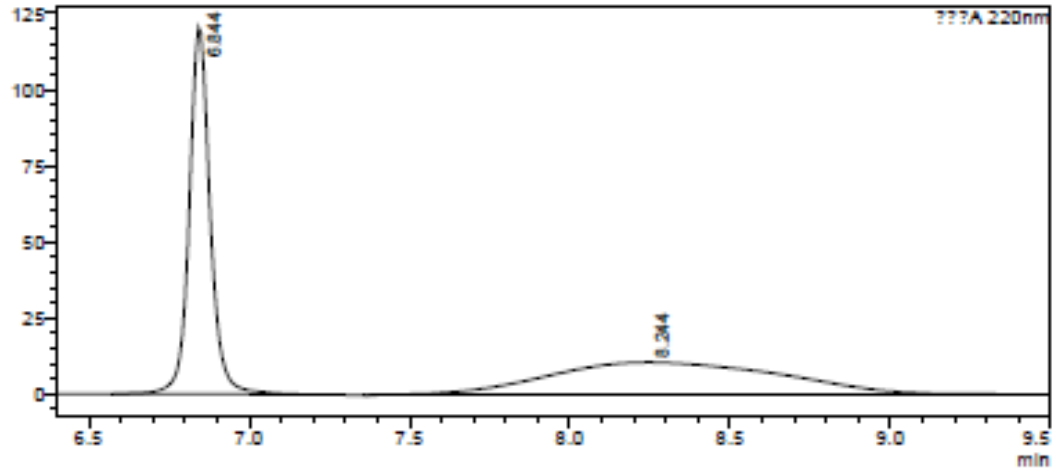

<Peak Table>

???A 220nm

| Peak# | Ret. Time | Area    | Height | Conc.  | Unit | Mark | Name |
|-------|-----------|---------|--------|--------|------|------|------|
| 1     | 6.844     | 548679  | 120348 | 50.583 |      |      |      |
| 2     | 8.244     | 536030  | 10573  | 49.417 |      |      |      |
| Total |           | 1084709 | 130921 |        |      |      |      |

<Chromatogram>

mV

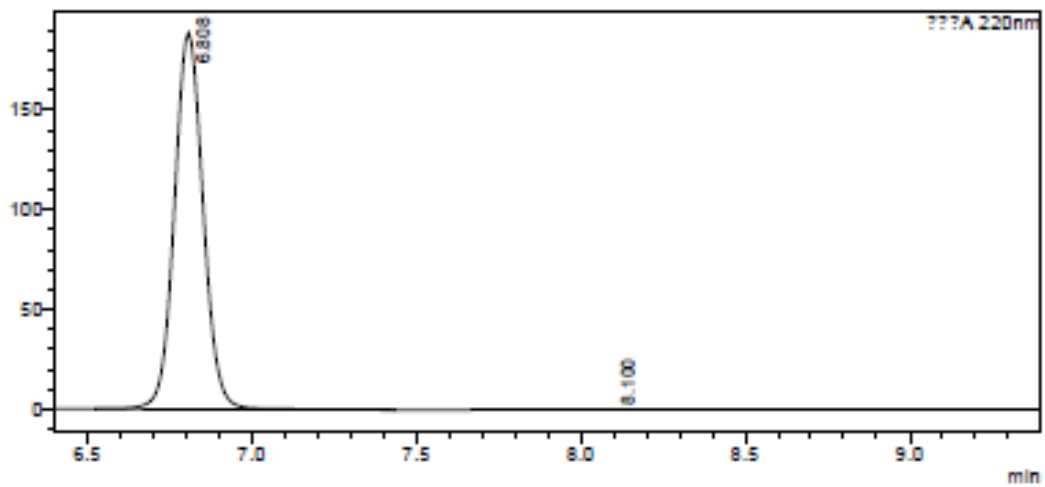

<Peak Table>

???A 220nm

| Peak# | Ret. Time | Area    | Height | Conc.  | Unit | Mark | Name |
|-------|-----------|---------|--------|--------|------|------|------|
| 1     | 6.808     | 1145250 | 188510 | 99.965 |      |      |      |
| 2     | 8.100     | 396     | 31     | 0.035  |      | M    |      |
| Total |           | 1145646 | 188540 |        |      |      |      |
